# Supplementary material for: RNAMethPre: A Web Server for the Prediction and Query of mRNA m6A Sites
Source: PLoS One. 2016 Oct 10;11(10):e0162707. doi: 10.1371/journal.pone.0162707 (PMC5056760; doi:10.1371/journal.pone.0162707)
Supplement: S6 Table — (XLSX) [file pone.0162707.s009.xlsx]

## Sheet: S6 Table
S6 Table. The mouse testing dataset for the full transcript mode predictor
TranscriptID	Position	Class	TranscriptID	Position	Class	TranscriptID	Position	Class	TranscriptID	Position	Class	TranscriptID	Position	Class	TranscriptID	Position	Class	TranscriptID	Position	Class	TranscriptID	Position	Class	TranscriptID	Position	Class	TranscriptID	Position	Class	TranscriptID	Position	Class
ENSMUST00000026043	62564	1	ENSMUST00000019679	3094	-1	ENSMUST00000021347	20235	-1	ENSMUST00000022603	8302	-1	ENSMUST00000024599	28751	-1	ENSMUST00000025963	25211	-1	ENSMUST00000027655	9042	-1	ENSMUST00000029222	20662	-1	ENSMUST00000030676	13971	-1	ENSMUST00000032168	2535	-1	ENSMUST00000033975	1921	-1
ENSMUST00000026043	62585	1	ENSMUST00000019679	313	-1	ENSMUST00000021347	20567	-1	ENSMUST00000022603	8553	-1	ENSMUST00000024599	2902	-1	ENSMUST00000025963	25469	-1	ENSMUST00000027655	9963	-1	ENSMUST00000029222	20711	-1	ENSMUST00000030676	141818	-1	ENSMUST00000032168	2613	-1	ENSMUST00000033975	19537	-1
ENSMUST00000026043	40412	1	ENSMUST00000019679	3607	-1	ENSMUST00000021347	20713	-1	ENSMUST00000022603	8871	-1	ENSMUST00000024599	29147	-1	ENSMUST00000025963	25561	-1	ENSMUST00000027657	10208	-1	ENSMUST00000029222	20856	-1	ENSMUST00000030676	147667	-1	ENSMUST00000032168	2882	-1	ENSMUST00000033975	23646	-1
ENSMUST00000026043	40419	1	ENSMUST00000019679	3865	-1	ENSMUST00000021347	21083	-1	ENSMUST00000022603	8881	-1	ENSMUST00000024599	29378	-1	ENSMUST00000025963	26021	-1	ENSMUST00000027657	10492	-1	ENSMUST00000029222	21147	-1	ENSMUST00000030676	148260	-1	ENSMUST00000032168	3083	-1	ENSMUST00000033975	24366	-1
ENSMUST00000099353	2069	1	ENSMUST00000019679	4334	-1	ENSMUST00000021347	21178	-1	ENSMUST00000022603	8908	-1	ENSMUST00000024599	29603	-1	ENSMUST00000025963	26268	-1	ENSMUST00000027657	10517	-1	ENSMUST00000029222	21236	-1	ENSMUST00000030676	150502	-1	ENSMUST00000032168	3512	-1	ENSMUST00000033975	24490	-1
ENSMUST00000164039	584	1	ENSMUST00000019679	450	-1	ENSMUST00000021347	21989	-1	ENSMUST00000022603	8947	-1	ENSMUST00000024599	30308	-1	ENSMUST00000025963	2631	-1	ENSMUST00000027657	11019	-1	ENSMUST00000029222	21304	-1	ENSMUST00000030676	153078	-1	ENSMUST00000032168	3521	-1	ENSMUST00000033975	24645	-1
ENSMUST00000164039	3254	1	ENSMUST00000019679	4609	-1	ENSMUST00000021347	22664	-1	ENSMUST00000022603	9151	-1	ENSMUST00000024599	30595	-1	ENSMUST00000025963	26579	-1	ENSMUST00000027657	11465	-1	ENSMUST00000029222	21468	-1	ENSMUST00000030676	163921	-1	ENSMUST00000032168	3627	-1	ENSMUST00000033975	2515	-1
ENSMUST00000164039	530383	1	ENSMUST00000019679	4976	-1	ENSMUST00000021347	22771	-1	ENSMUST00000022603	9612	-1	ENSMUST00000024599	32253	-1	ENSMUST00000025963	27141	-1	ENSMUST00000027657	12374	-1	ENSMUST00000029222	21638	-1	ENSMUST00000030676	166040	-1	ENSMUST00000032168	4341	-1	ENSMUST00000033975	25159	-1
ENSMUST00000111741	104956	1	ENSMUST00000019679	5119	-1	ENSMUST00000021347	23145	-1	ENSMUST00000022603	9718	-1	ENSMUST00000024599	33588	-1	ENSMUST00000025963	27545	-1	ENSMUST00000027657	12854	-1	ENSMUST00000029222	22389	-1	ENSMUST00000030676	166862	-1	ENSMUST00000032168	5024	-1	ENSMUST00000033975	26023	-1
ENSMUST00000111741	104971	1	ENSMUST00000019679	5243	-1	ENSMUST00000021347	23164	-1	ENSMUST00000022609	10210	-1	ENSMUST00000024599	35511	-1	ENSMUST00000025963	27686	-1	ENSMUST00000027657	12860	-1	ENSMUST00000029222	25380	-1	ENSMUST00000030676	168155	-1	ENSMUST00000032168	5057	-1	ENSMUST00000033975	26029	-1
ENSMUST00000003870	61335	1	ENSMUST00000019679	5993	-1	ENSMUST00000021347	24532	-1	ENSMUST00000022609	10337	-1	ENSMUST00000024599	38813	-1	ENSMUST00000025963	27733	-1	ENSMUST00000027657	14481	-1	ENSMUST00000029222	25935	-1	ENSMUST00000030676	169244	-1	ENSMUST00000032168	5385	-1	ENSMUST00000033975	26726	-1
ENSMUST00000038287	12411	1	ENSMUST00000019679	5998	-1	ENSMUST00000021347	25579	-1	ENSMUST00000022609	11359	-1	ENSMUST00000024599	39113	-1	ENSMUST00000025963	27959	-1	ENSMUST00000027657	14516	-1	ENSMUST00000029222	26222	-1	ENSMUST00000030676	171815	-1	ENSMUST00000032168	5611	-1	ENSMUST00000033975	26838	-1
ENSMUST00000038287	12735	1	ENSMUST00000019679	6042	-1	ENSMUST00000021347	27515	-1	ENSMUST00000022609	11436	-1	ENSMUST00000024599	39593	-1	ENSMUST00000025963	28287	-1	ENSMUST00000027657	14537	-1	ENSMUST00000029222	27119	-1	ENSMUST00000030676	174262	-1	ENSMUST00000032168	5637	-1	ENSMUST00000033975	27494	-1
ENSMUST00000025932	42834	1	ENSMUST00000019679	6894	-1	ENSMUST00000021347	28165	-1	ENSMUST00000022609	12081	-1	ENSMUST00000024599	39890	-1	ENSMUST00000025963	28322	-1	ENSMUST00000027657	15757	-1	ENSMUST00000029222	28118	-1	ENSMUST00000030676	17523	-1	ENSMUST00000032168	5768	-1	ENSMUST00000033975	27546	-1
ENSMUST00000025932	43107	1	ENSMUST00000019679	6902	-1	ENSMUST00000021347	28734	-1	ENSMUST00000022609	13599	-1	ENSMUST00000024599	41235	-1	ENSMUST00000025963	28679	-1	ENSMUST00000027657	1616	-1	ENSMUST00000029222	28212	-1	ENSMUST00000030676	183011	-1	ENSMUST00000032168	5857	-1	ENSMUST00000033975	27721	-1
ENSMUST00000025932	43122	1	ENSMUST00000019679	6912	-1	ENSMUST00000021347	30045	-1	ENSMUST00000022609	13748	-1	ENSMUST00000024599	42184	-1	ENSMUST00000025963	29111	-1	ENSMUST00000027657	17285	-1	ENSMUST00000029222	28995	-1	ENSMUST00000030676	185163	-1	ENSMUST00000032168	6056	-1	ENSMUST00000033975	28748	-1
ENSMUST00000025932	43186	1	ENSMUST00000019679	715	-1	ENSMUST00000021347	31086	-1	ENSMUST00000022609	14321	-1	ENSMUST00000024599	42457	-1	ENSMUST00000025963	29151	-1	ENSMUST00000027657	1738	-1	ENSMUST00000029222	29430	-1	ENSMUST00000030676	187997	-1	ENSMUST00000032168	6159	-1	ENSMUST00000033975	28915	-1
ENSMUST00000025932	43253	1	ENSMUST00000019679	7444	-1	ENSMUST00000021347	3124	-1	ENSMUST00000022609	14780	-1	ENSMUST00000024599	45284	-1	ENSMUST00000025963	29433	-1	ENSMUST00000027657	17388	-1	ENSMUST00000029222	29474	-1	ENSMUST00000030676	193062	-1	ENSMUST00000032168	6414	-1	ENSMUST00000033975	2950	-1
ENSMUST00000025932	86438	1	ENSMUST00000019679	7568	-1	ENSMUST00000021347	32417	-1	ENSMUST00000022609	15344	-1	ENSMUST00000024599	46438	-1	ENSMUST00000025963	29684	-1	ENSMUST00000027657	17500	-1	ENSMUST00000029222	29824	-1	ENSMUST00000030676	194354	-1	ENSMUST00000032168	6607	-1	ENSMUST00000033975	4202	-1
ENSMUST00000025932	43089	1	ENSMUST00000019679	7616	-1	ENSMUST00000021347	32857	-1	ENSMUST00000022609	15574	-1	ENSMUST00000024599	4652	-1	ENSMUST00000025963	30700	-1	ENSMUST00000027657	17648	-1	ENSMUST00000029222	29882	-1	ENSMUST00000030676	203589	-1	ENSMUST00000032168	6756	-1	ENSMUST00000033975	4678	-1
ENSMUST00000025932	86407	1	ENSMUST00000019679	7654	-1	ENSMUST00000021347	3500	-1	ENSMUST00000022609	16596	-1	ENSMUST00000024599	47706	-1	ENSMUST00000025963	4116	-1	ENSMUST00000027657	17842	-1	ENSMUST00000029222	3050	-1	ENSMUST00000030676	204017	-1	ENSMUST00000032168	7177	-1	ENSMUST00000033975	471	-1
ENSMUST00000036700	943	1	ENSMUST00000019679	7805	-1	ENSMUST00000021347	35225	-1	ENSMUST00000022609	17823	-1	ENSMUST00000024599	4889	-1	ENSMUST00000025963	4148	-1	ENSMUST00000027657	18764	-1	ENSMUST00000029222	30629	-1	ENSMUST00000030676	208237	-1	ENSMUST00000032168	7184	-1	ENSMUST00000033975	5489	-1
ENSMUST00000036700	947	1	ENSMUST00000019679	810	-1	ENSMUST00000021347	36043	-1	ENSMUST00000022609	1807	-1	ENSMUST00000024599	49631	-1	ENSMUST00000025963	495	-1	ENSMUST00000027657	19420	-1	ENSMUST00000029222	30871	-1	ENSMUST00000030676	212199	-1	ENSMUST00000032168	7423	-1	ENSMUST00000033975	5504	-1
ENSMUST00000036700	1107	1	ENSMUST00000019679	8141	-1	ENSMUST00000021347	36521	-1	ENSMUST00000022609	18394	-1	ENSMUST00000024599	49820	-1	ENSMUST00000025963	5577	-1	ENSMUST00000027657	20445	-1	ENSMUST00000029222	31297	-1	ENSMUST00000030676	214158	-1	ENSMUST00000032168	7577	-1	ENSMUST00000033975	5658	-1
ENSMUST00000036700	1119	1	ENSMUST00000019679	8938	-1	ENSMUST00000021347	36737	-1	ENSMUST00000022609	18550	-1	ENSMUST00000024599	49872	-1	ENSMUST00000025963	6086	-1	ENSMUST00000027657	20452	-1	ENSMUST00000029222	31400	-1	ENSMUST00000030676	214534	-1	ENSMUST00000032168	7608	-1	ENSMUST00000033975	8156	-1
ENSMUST00000036700	2412	1	ENSMUST00000019679	9210	-1	ENSMUST00000021347	37989	-1	ENSMUST00000022609	1915	-1	ENSMUST00000024599	52433	-1	ENSMUST00000025963	6107	-1	ENSMUST00000027657	2057	-1	ENSMUST00000029222	3189	-1	ENSMUST00000030676	214590	-1	ENSMUST00000032168	7942	-1	ENSMUST00000033975	8561	-1
ENSMUST00000086868	2962	1	ENSMUST00000019708	10447	-1	ENSMUST00000021347	38045	-1	ENSMUST00000022609	20323	-1	ENSMUST00000024599	52728	-1	ENSMUST00000025963	6270	-1	ENSMUST00000027657	2170	-1	ENSMUST00000029222	3431	-1	ENSMUST00000030676	218909	-1	ENSMUST00000032168	8572	-1	ENSMUST00000033975	8720	-1
ENSMUST00000076891	16367	1	ENSMUST00000019708	10454	-1	ENSMUST00000021347	38472	-1	ENSMUST00000022609	20878	-1	ENSMUST00000024599	57642	-1	ENSMUST00000025963	7891	-1	ENSMUST00000027657	21773	-1	ENSMUST00000029222	3682	-1	ENSMUST00000030676	21938	-1	ENSMUST00000032168	8633	-1	ENSMUST00000033975	9139	-1
ENSMUST00000070075	130358	1	ENSMUST00000019708	10940	-1	ENSMUST00000021347	38790	-1	ENSMUST00000022609	21153	-1	ENSMUST00000024599	598	-1	ENSMUST00000025963	791	-1	ENSMUST00000027657	21855	-1	ENSMUST00000029222	3828	-1	ENSMUST00000030676	220614	-1	ENSMUST00000032168	9095	-1	ENSMUST00000033975	9359	-1
ENSMUST00000086848	190995	1	ENSMUST00000019708	11020	-1	ENSMUST00000021347	39041	-1	ENSMUST00000022609	22167	-1	ENSMUST00000024599	61251	-1	ENSMUST00000025963	8448	-1	ENSMUST00000027657	22592	-1	ENSMUST00000029222	4565	-1	ENSMUST00000030676	22102	-1	ENSMUST00000032168	9100	-1	ENSMUST00000033975	9674	-1
ENSMUST00000026062	44622	1	ENSMUST00000019708	11178	-1	ENSMUST00000021347	39705	-1	ENSMUST00000022609	22316	-1	ENSMUST00000024599	6223	-1	ENSMUST00000025963	8496	-1	ENSMUST00000027657	22948	-1	ENSMUST00000029222	5036	-1	ENSMUST00000030676	222485	-1	ENSMUST00000032168	9688	-1	ENSMUST00000033975	9695	-1
ENSMUST00000026063	15997	1	ENSMUST00000019708	116	-1	ENSMUST00000021347	40141	-1	ENSMUST00000022609	22980	-1	ENSMUST00000024599	64625	-1	ENSMUST00000025963	8592	-1	ENSMUST00000027657	22973	-1	ENSMUST00000029222	5528	-1	ENSMUST00000030676	22914	-1	ENSMUST00000032168	9736	-1	ENSMUST00000033975	9708	-1
ENSMUST00000026063	16294	1	ENSMUST00000019708	12842	-1	ENSMUST00000021347	40157	-1	ENSMUST00000022609	24113	-1	ENSMUST00000024599	65210	-1	ENSMUST00000025963	9240	-1	ENSMUST00000027657	22994	-1	ENSMUST00000029222	5682	-1	ENSMUST00000030676	27384	-1	ENSMUST00000032169	1010	-1	ENSMUST00000033990	102846	-1
ENSMUST00000026063	17761	1	ENSMUST00000019708	12984	-1	ENSMUST00000021347	40488	-1	ENSMUST00000022609	25474	-1	ENSMUST00000024599	65623	-1	ENSMUST00000025963	9809	-1	ENSMUST00000027657	23301	-1	ENSMUST00000029222	6155	-1	ENSMUST00000030676	29460	-1	ENSMUST00000032169	1023	-1	ENSMUST00000033990	105129	-1
ENSMUST00000026063	15107	1	ENSMUST00000019708	13632	-1	ENSMUST00000021347	41656	-1	ENSMUST00000022609	25728	-1	ENSMUST00000024599	67174	-1	ENSMUST00000025973	103450	-1	ENSMUST00000027657	2338	-1	ENSMUST00000029222	6339	-1	ENSMUST00000030676	31617	-1	ENSMUST00000032169	1303	-1	ENSMUST00000033990	1063	-1
ENSMUST00000026063	16313	1	ENSMUST00000019708	13928	-1	ENSMUST00000021347	42429	-1	ENSMUST00000022609	26960	-1	ENSMUST00000024599	67211	-1	ENSMUST00000025973	110539	-1	ENSMUST00000027657	23545	-1	ENSMUST00000029222	6724	-1	ENSMUST00000030676	32336	-1	ENSMUST00000032169	1365	-1	ENSMUST00000033990	106583	-1
ENSMUST00000026063	18006	1	ENSMUST00000019708	14472	-1	ENSMUST00000021347	6066	-1	ENSMUST00000022609	28017	-1	ENSMUST00000024599	6910	-1	ENSMUST00000025973	111321	-1	ENSMUST00000027657	23600	-1	ENSMUST00000029222	7105	-1	ENSMUST00000030676	43865	-1	ENSMUST00000032169	1421	-1	ENSMUST00000033990	106956	-1
ENSMUST00000038949	2245	1	ENSMUST00000019708	15080	-1	ENSMUST00000021347	6964	-1	ENSMUST00000022609	28311	-1	ENSMUST00000024599	69108	-1	ENSMUST00000025973	11186	-1	ENSMUST00000027657	23942	-1	ENSMUST00000029222	7534	-1	ENSMUST00000030676	46604	-1	ENSMUST00000032169	1613	-1	ENSMUST00000033990	109953	-1
ENSMUST00000118592	2047	1	ENSMUST00000019708	15103	-1	ENSMUST00000021347	6979	-1	ENSMUST00000022609	28723	-1	ENSMUST00000024599	69557	-1	ENSMUST00000025973	112658	-1	ENSMUST00000027657	24231	-1	ENSMUST00000029222	7790	-1	ENSMUST00000030676	47917	-1	ENSMUST00000032169	1667	-1	ENSMUST00000033990	111383	-1
ENSMUST00000118592	3510	1	ENSMUST00000019708	15367	-1	ENSMUST00000021347	7127	-1	ENSMUST00000022609	29133	-1	ENSMUST00000024599	70459	-1	ENSMUST00000025973	11672	-1	ENSMUST00000027657	24969	-1	ENSMUST00000029222	7956	-1	ENSMUST00000030676	50381	-1	ENSMUST00000032169	1720	-1	ENSMUST00000033990	112356	-1
ENSMUST00000118592	25719	1	ENSMUST00000019708	15741	-1	ENSMUST00000021347	7335	-1	ENSMUST00000022609	32494	-1	ENSMUST00000024599	70738	-1	ENSMUST00000025973	120299	-1	ENSMUST00000027657	25427	-1	ENSMUST00000029222	8130	-1	ENSMUST00000030676	54566	-1	ENSMUST00000032169	1962	-1	ENSMUST00000033990	113514	-1
ENSMUST00000118592	25810	1	ENSMUST00000019708	15979	-1	ENSMUST00000021347	7838	-1	ENSMUST00000022609	32811	-1	ENSMUST00000024599	71243	-1	ENSMUST00000025973	120784	-1	ENSMUST00000027657	25499	-1	ENSMUST00000029222	8667	-1	ENSMUST00000030676	54783	-1	ENSMUST00000032169	2137	-1	ENSMUST00000033990	113763	-1
ENSMUST00000118592	25851	1	ENSMUST00000019708	16260	-1	ENSMUST00000021347	7964	-1	ENSMUST00000022609	33015	-1	ENSMUST00000024599	72021	-1	ENSMUST00000025973	120799	-1	ENSMUST00000027657	26588	-1	ENSMUST00000029222	8718	-1	ENSMUST00000030676	57865	-1	ENSMUST00000032169	2249	-1	ENSMUST00000033990	114096	-1
ENSMUST00000118592	26001	1	ENSMUST00000019708	16321	-1	ENSMUST00000021347	7977	-1	ENSMUST00000022609	33845	-1	ENSMUST00000024599	73042	-1	ENSMUST00000025973	120939	-1	ENSMUST00000027657	3013	-1	ENSMUST00000029222	9026	-1	ENSMUST00000030676	69420	-1	ENSMUST00000032169	2256	-1	ENSMUST00000033990	114805	-1
ENSMUST00000118592	26052	1	ENSMUST00000019708	16591	-1	ENSMUST00000021347	8898	-1	ENSMUST00000022609	37218	-1	ENSMUST00000024599	74410	-1	ENSMUST00000025973	121256	-1	ENSMUST00000027657	3033	-1	ENSMUST00000029222	9376	-1	ENSMUST00000030676	78281	-1	ENSMUST00000032169	259	-1	ENSMUST00000033990	117080	-1
ENSMUST00000118592	26032	1	ENSMUST00000019708	16945	-1	ENSMUST00000021347	9676	-1	ENSMUST00000022609	39013	-1	ENSMUST00000024599	75251	-1	ENSMUST00000025973	125394	-1	ENSMUST00000027657	3428	-1	ENSMUST00000029222	9557	-1	ENSMUST00000030676	80165	-1	ENSMUST00000032169	2755	-1	ENSMUST00000033990	117320	-1
ENSMUST00000122359	990	1	ENSMUST00000019708	17014	-1	ENSMUST00000021356	1427	-1	ENSMUST00000022609	39980	-1	ENSMUST00000024599	76018	-1	ENSMUST00000025973	126743	-1	ENSMUST00000027657	5157	-1	ENSMUST00000029222	9839	-1	ENSMUST00000030676	81493	-1	ENSMUST00000032169	2845	-1	ENSMUST00000033990	118562	-1
ENSMUST00000122359	1018	1	ENSMUST00000019708	17378	-1	ENSMUST00000021356	1457	-1	ENSMUST00000022609	40119	-1	ENSMUST00000024599	80089	-1	ENSMUST00000025973	127587	-1	ENSMUST00000027657	5715	-1	ENSMUST00000029240	1000	-1	ENSMUST00000030676	82117	-1	ENSMUST00000032169	2865	-1	ENSMUST00000033990	119412	-1
ENSMUST00000079360	750	1	ENSMUST00000019708	18192	-1	ENSMUST00000021356	1471	-1	ENSMUST00000022609	41006	-1	ENSMUST00000024599	83936	-1	ENSMUST00000025973	128416	-1	ENSMUST00000027657	6772	-1	ENSMUST00000029240	10036	-1	ENSMUST00000030676	87007	-1	ENSMUST00000032169	2916	-1	ENSMUST00000033990	121699	-1
ENSMUST00000079360	4261	1	ENSMUST00000019708	18423	-1	ENSMUST00000021356	1576	-1	ENSMUST00000022609	44637	-1	ENSMUST00000024599	84986	-1	ENSMUST00000025973	128505	-1	ENSMUST00000027657	7558	-1	ENSMUST00000029240	10446	-1	ENSMUST00000030676	88477	-1	ENSMUST00000032169	2997	-1	ENSMUST00000033990	130337	-1
ENSMUST00000079360	4415	1	ENSMUST00000019708	18773	-1	ENSMUST00000021356	1610	-1	ENSMUST00000022609	45327	-1	ENSMUST00000024599	86412	-1	ENSMUST00000025973	131700	-1	ENSMUST00000027657	792	-1	ENSMUST00000029240	11084	-1	ENSMUST00000030676	91625	-1	ENSMUST00000032169	3008	-1	ENSMUST00000033990	132090	-1
ENSMUST00000079360	4460	1	ENSMUST00000019708	18777	-1	ENSMUST00000021356	1714	-1	ENSMUST00000022609	46589	-1	ENSMUST00000024599	87050	-1	ENSMUST00000025973	134173	-1	ENSMUST00000027657	8216	-1	ENSMUST00000029240	1109	-1	ENSMUST00000030676	92767	-1	ENSMUST00000032169	3215	-1	ENSMUST00000033990	132841	-1
ENSMUST00000079360	4464	1	ENSMUST00000019708	18900	-1	ENSMUST00000021356	1769	-1	ENSMUST00000022609	46711	-1	ENSMUST00000024619	100395	-1	ENSMUST00000025973	137586	-1	ENSMUST00000027657	8534	-1	ENSMUST00000029240	11148	-1	ENSMUST00000030676	94356	-1	ENSMUST00000032169	3223	-1	ENSMUST00000033990	140761	-1
ENSMUST00000079360	4435	1	ENSMUST00000019708	19062	-1	ENSMUST00000021356	1834	-1	ENSMUST00000022609	47169	-1	ENSMUST00000024619	100415	-1	ENSMUST00000025973	137807	-1	ENSMUST00000027657	9229	-1	ENSMUST00000029240	11283	-1	ENSMUST00000030684	10247	-1	ENSMUST00000032169	3273	-1	ENSMUST00000033990	145122	-1
ENSMUST00000079360	4475	1	ENSMUST00000019708	19222	-1	ENSMUST00000021356	2033	-1	ENSMUST00000022609	49703	-1	ENSMUST00000024619	101440	-1	ENSMUST00000025973	142036	-1	ENSMUST00000027657	9600	-1	ENSMUST00000029240	12219	-1	ENSMUST00000030684	10833	-1	ENSMUST00000032169	3462	-1	ENSMUST00000033990	14762	-1
ENSMUST00000079360	4478	1	ENSMUST00000019708	19280	-1	ENSMUST00000021356	2112	-1	ENSMUST00000022609	50629	-1	ENSMUST00000024619	102705	-1	ENSMUST00000025973	144278	-1	ENSMUST00000027657	9653	-1	ENSMUST00000029240	12391	-1	ENSMUST00000030684	11193	-1	ENSMUST00000032169	3636	-1	ENSMUST00000033990	147786	-1
ENSMUST00000036407	25881	1	ENSMUST00000019708	19721	-1	ENSMUST00000021356	2154	-1	ENSMUST00000022609	57898	-1	ENSMUST00000024619	103377	-1	ENSMUST00000025973	14473	-1	ENSMUST00000027657	9876	-1	ENSMUST00000029240	13056	-1	ENSMUST00000030684	12028	-1	ENSMUST00000032169	3673	-1	ENSMUST00000033990	149834	-1
ENSMUST00000036407	25893	1	ENSMUST00000019708	20697	-1	ENSMUST00000021356	230	-1	ENSMUST00000022609	58007	-1	ENSMUST00000024619	107616	-1	ENSMUST00000025973	153989	-1	ENSMUST00000027675	10284	-1	ENSMUST00000029240	13085	-1	ENSMUST00000030684	12556	-1	ENSMUST00000032169	3760	-1	ENSMUST00000033990	20920	-1
ENSMUST00000026072	35256	1	ENSMUST00000019708	2100	-1	ENSMUST00000021356	2339	-1	ENSMUST00000022609	59061	-1	ENSMUST00000024619	10916	-1	ENSMUST00000025973	161646	-1	ENSMUST00000027675	10549	-1	ENSMUST00000029240	13974	-1	ENSMUST00000030684	12680	-1	ENSMUST00000032169	3953	-1	ENSMUST00000033990	23372	-1
ENSMUST00000026072	35281	1	ENSMUST00000019708	22400	-1	ENSMUST00000021356	2653	-1	ENSMUST00000022609	59223	-1	ENSMUST00000024619	114984	-1	ENSMUST00000025973	162504	-1	ENSMUST00000027675	1058	-1	ENSMUST00000029240	14130	-1	ENSMUST00000030684	12963	-1	ENSMUST00000032169	426	-1	ENSMUST00000033990	28919	-1
ENSMUST00000026072	35909	1	ENSMUST00000019708	22792	-1	ENSMUST00000021356	2760	-1	ENSMUST00000022609	61126	-1	ENSMUST00000024619	118963	-1	ENSMUST00000025973	166444	-1	ENSMUST00000027675	11050	-1	ENSMUST00000029240	14604	-1	ENSMUST00000030684	13033	-1	ENSMUST00000032169	4299	-1	ENSMUST00000033990	30094	-1
ENSMUST00000077282	520170	1	ENSMUST00000019708	23477	-1	ENSMUST00000021356	2795	-1	ENSMUST00000022609	784	-1	ENSMUST00000024619	121111	-1	ENSMUST00000025973	167139	-1	ENSMUST00000027675	11883	-1	ENSMUST00000029240	14860	-1	ENSMUST00000030684	13190	-1	ENSMUST00000032169	443	-1	ENSMUST00000033990	31335	-1
ENSMUST00000077282	520315	1	ENSMUST00000019708	2349	-1	ENSMUST00000021356	287	-1	ENSMUST00000022609	7870	-1	ENSMUST00000024619	126086	-1	ENSMUST00000025973	167326	-1	ENSMUST00000027675	12091	-1	ENSMUST00000029240	14910	-1	ENSMUST00000030684	14067	-1	ENSMUST00000032169	4477	-1	ENSMUST00000033990	33131	-1
ENSMUST00000077282	520337	1	ENSMUST00000019708	24141	-1	ENSMUST00000021356	2990	-1	ENSMUST00000022609	8407	-1	ENSMUST00000024619	127169	-1	ENSMUST00000025973	168745	-1	ENSMUST00000027675	1268	-1	ENSMUST00000029240	15006	-1	ENSMUST00000030684	15864	-1	ENSMUST00000032169	4641	-1	ENSMUST00000033990	33911	-1
ENSMUST00000077282	520513	1	ENSMUST00000019708	24933	-1	ENSMUST00000021356	3264	-1	ENSMUST00000022609	9193	-1	ENSMUST00000024619	1638	-1	ENSMUST00000025973	174467	-1	ENSMUST00000027675	12752	-1	ENSMUST00000029240	15030	-1	ENSMUST00000030684	1627	-1	ENSMUST00000032169	4676	-1	ENSMUST00000033990	35598	-1
ENSMUST00000077282	521179	1	ENSMUST00000019708	25593	-1	ENSMUST00000021356	3409	-1	ENSMUST00000022614	10555	-1	ENSMUST00000024619	1962	-1	ENSMUST00000025973	174741	-1	ENSMUST00000027675	13130	-1	ENSMUST00000029240	1528	-1	ENSMUST00000030684	16877	-1	ENSMUST00000032169	4766	-1	ENSMUST00000033990	37398	-1
ENSMUST00000077282	521269	1	ENSMUST00000019708	2609	-1	ENSMUST00000021356	3484	-1	ENSMUST00000022614	1073	-1	ENSMUST00000024619	20074	-1	ENSMUST00000025973	181930	-1	ENSMUST00000027675	13775	-1	ENSMUST00000029240	15468	-1	ENSMUST00000030684	17129	-1	ENSMUST00000032169	4857	-1	ENSMUST00000033990	39531	-1
ENSMUST00000077282	521326	1	ENSMUST00000019708	26182	-1	ENSMUST00000021356	3542	-1	ENSMUST00000022614	11925	-1	ENSMUST00000024619	21270	-1	ENSMUST00000025973	185675	-1	ENSMUST00000027675	14186	-1	ENSMUST00000029240	15925	-1	ENSMUST00000030684	17298	-1	ENSMUST00000032169	4946	-1	ENSMUST00000033990	41512	-1
ENSMUST00000077282	521193	1	ENSMUST00000019708	26489	-1	ENSMUST00000021356	3633	-1	ENSMUST00000022614	1222	-1	ENSMUST00000024619	21383	-1	ENSMUST00000025973	186007	-1	ENSMUST00000027675	15442	-1	ENSMUST00000029240	16331	-1	ENSMUST00000030684	17348	-1	ENSMUST00000032169	4957	-1	ENSMUST00000033990	43	-1
ENSMUST00000077282	521220	1	ENSMUST00000019708	27013	-1	ENSMUST00000021356	3716	-1	ENSMUST00000022614	12406	-1	ENSMUST00000024619	25151	-1	ENSMUST00000025973	195687	-1	ENSMUST00000027675	15685	-1	ENSMUST00000029240	1707	-1	ENSMUST00000030684	17480	-1	ENSMUST00000032169	497	-1	ENSMUST00000033990	44964	-1
ENSMUST00000026076	678	1	ENSMUST00000019708	27022	-1	ENSMUST00000021356	4046	-1	ENSMUST00000022614	12488	-1	ENSMUST00000024619	27135	-1	ENSMUST00000025973	196274	-1	ENSMUST00000027675	16192	-1	ENSMUST00000029240	17969	-1	ENSMUST00000030684	18083	-1	ENSMUST00000032169	5096	-1	ENSMUST00000033990	49438	-1
ENSMUST00000026076	2321	1	ENSMUST00000019708	27236	-1	ENSMUST00000021356	4164	-1	ENSMUST00000022614	12962	-1	ENSMUST00000024619	30257	-1	ENSMUST00000025973	206472	-1	ENSMUST00000027675	16774	-1	ENSMUST00000029240	19447	-1	ENSMUST00000030684	18231	-1	ENSMUST00000032169	5156	-1	ENSMUST00000033990	50860	-1
ENSMUST00000026076	2348	1	ENSMUST00000019708	27687	-1	ENSMUST00000021356	4189	-1	ENSMUST00000022614	13632	-1	ENSMUST00000024619	31096	-1	ENSMUST00000025973	209658	-1	ENSMUST00000027675	16875	-1	ENSMUST00000029240	1956	-1	ENSMUST00000030684	18611	-1	ENSMUST00000032169	5317	-1	ENSMUST00000033990	54337	-1
ENSMUST00000026076	2372	1	ENSMUST00000019708	2958	-1	ENSMUST00000021356	4294	-1	ENSMUST00000022614	14414	-1	ENSMUST00000024619	31713	-1	ENSMUST00000025973	211126	-1	ENSMUST00000027675	1723	-1	ENSMUST00000029240	19982	-1	ENSMUST00000030684	18967	-1	ENSMUST00000032169	5374	-1	ENSMUST00000033990	55020	-1
ENSMUST00000026076	2377	1	ENSMUST00000019708	3270	-1	ENSMUST00000021356	45	-1	ENSMUST00000022614	15807	-1	ENSMUST00000024619	35151	-1	ENSMUST00000025973	211933	-1	ENSMUST00000027675	17872	-1	ENSMUST00000029240	20017	-1	ENSMUST00000030684	18972	-1	ENSMUST00000032169	5720	-1	ENSMUST00000033990	56048	-1
ENSMUST00000026076	2541	1	ENSMUST00000019708	3387	-1	ENSMUST00000021356	4725	-1	ENSMUST00000022614	16354	-1	ENSMUST00000024619	36897	-1	ENSMUST00000025973	214152	-1	ENSMUST00000027675	17939	-1	ENSMUST00000029240	20056	-1	ENSMUST00000030684	19511	-1	ENSMUST00000032169	5860	-1	ENSMUST00000033990	58510	-1
ENSMUST00000026076	2547	1	ENSMUST00000019708	5142	-1	ENSMUST00000021356	4949	-1	ENSMUST00000022614	16450	-1	ENSMUST00000024619	39638	-1	ENSMUST00000025973	2192	-1	ENSMUST00000027675	18192	-1	ENSMUST00000029240	20484	-1	ENSMUST00000030684	19611	-1	ENSMUST00000032169	5882	-1	ENSMUST00000033990	61507	-1
ENSMUST00000026076	2557	1	ENSMUST00000019708	5176	-1	ENSMUST00000021356	5036	-1	ENSMUST00000022614	16485	-1	ENSMUST00000024619	41585	-1	ENSMUST00000025973	231	-1	ENSMUST00000027675	18921	-1	ENSMUST00000029240	20569	-1	ENSMUST00000030684	2016	-1	ENSMUST00000032169	748	-1	ENSMUST00000033990	64260	-1
ENSMUST00000026076	2594	1	ENSMUST00000019708	5389	-1	ENSMUST00000021356	5041	-1	ENSMUST00000022614	16817	-1	ENSMUST00000024619	42580	-1	ENSMUST00000025973	23189	-1	ENSMUST00000027675	2002	-1	ENSMUST00000029240	2113	-1	ENSMUST00000030684	20306	-1	ENSMUST00000032169	839	-1	ENSMUST00000033990	64301	-1
ENSMUST00000026076	2616	1	ENSMUST00000019708	6536	-1	ENSMUST00000021356	5333	-1	ENSMUST00000022614	1759	-1	ENSMUST00000024619	44129	-1	ENSMUST00000025973	26413	-1	ENSMUST00000027675	20121	-1	ENSMUST00000029240	23416	-1	ENSMUST00000030684	21483	-1	ENSMUST00000032169	891	-1	ENSMUST00000033990	65264	-1
ENSMUST00000026076	2312	1	ENSMUST00000019708	6910	-1	ENSMUST00000021356	5654	-1	ENSMUST00000022614	18724	-1	ENSMUST00000024619	47644	-1	ENSMUST00000025973	3029	-1	ENSMUST00000027675	20589	-1	ENSMUST00000029240	24388	-1	ENSMUST00000030684	2161	-1	ENSMUST00000032180	10364	-1	ENSMUST00000033990	70340	-1
ENSMUST00000066285	1028	1	ENSMUST00000019708	6978	-1	ENSMUST00000021356	5709	-1	ENSMUST00000022614	19179	-1	ENSMUST00000024619	48066	-1	ENSMUST00000025973	31989	-1	ENSMUST00000027675	20823	-1	ENSMUST00000029240	24845	-1	ENSMUST00000030684	21822	-1	ENSMUST00000032180	11422	-1	ENSMUST00000033990	72035	-1
ENSMUST00000066285	1131	1	ENSMUST00000019708	801	-1	ENSMUST00000021356	5893	-1	ENSMUST00000022614	19858	-1	ENSMUST00000024619	48993	-1	ENSMUST00000025973	52974	-1	ENSMUST00000027675	21340	-1	ENSMUST00000029240	24944	-1	ENSMUST00000030684	2196	-1	ENSMUST00000032180	11561	-1	ENSMUST00000033990	72814	-1
ENSMUST00000066285	1181	1	ENSMUST00000019708	9056	-1	ENSMUST00000021356	6180	-1	ENSMUST00000022614	19906	-1	ENSMUST00000024619	50274	-1	ENSMUST00000025973	53283	-1	ENSMUST00000027675	21391	-1	ENSMUST00000029240	25263	-1	ENSMUST00000030684	22308	-1	ENSMUST00000032180	12031	-1	ENSMUST00000033990	73837	-1
ENSMUST00000066285	1396	1	ENSMUST00000019708	9683	-1	ENSMUST00000021356	6574	-1	ENSMUST00000022614	20	-1	ENSMUST00000024619	50742	-1	ENSMUST00000025973	60094	-1	ENSMUST00000027675	21564	-1	ENSMUST00000029240	26250	-1	ENSMUST00000030684	22694	-1	ENSMUST00000032180	12205	-1	ENSMUST00000033990	74031	-1
ENSMUST00000066285	1479	1	ENSMUST00000019708	9726	-1	ENSMUST00000021356	6579	-1	ENSMUST00000022614	20256	-1	ENSMUST00000024619	53450	-1	ENSMUST00000025973	71826	-1	ENSMUST00000027675	2161	-1	ENSMUST00000029240	26696	-1	ENSMUST00000030684	23148	-1	ENSMUST00000032180	12729	-1	ENSMUST00000033990	75632	-1
ENSMUST00000066285	1512	1	ENSMUST00000019721	10467	-1	ENSMUST00000021356	6591	-1	ENSMUST00000022614	21299	-1	ENSMUST00000024619	54245	-1	ENSMUST00000025973	74028	-1	ENSMUST00000027675	21690	-1	ENSMUST00000029240	26866	-1	ENSMUST00000030684	23433	-1	ENSMUST00000032180	1274	-1	ENSMUST00000033990	76191	-1
ENSMUST00000066285	1526	1	ENSMUST00000019721	10758	-1	ENSMUST00000021356	6748	-1	ENSMUST00000022614	21328	-1	ENSMUST00000024619	54685	-1	ENSMUST00000025973	7439	-1	ENSMUST00000027675	21729	-1	ENSMUST00000029240	27250	-1	ENSMUST00000030684	23880	-1	ENSMUST00000032180	13037	-1	ENSMUST00000033990	76566	-1
ENSMUST00000066285	1572	1	ENSMUST00000019721	10825	-1	ENSMUST00000021356	6853	-1	ENSMUST00000022614	21527	-1	ENSMUST00000024619	57897	-1	ENSMUST00000025973	81676	-1	ENSMUST00000027675	21923	-1	ENSMUST00000029240	27786	-1	ENSMUST00000030684	24044	-1	ENSMUST00000032180	15244	-1	ENSMUST00000033990	77948	-1
ENSMUST00000066285	1684	1	ENSMUST00000019721	10933	-1	ENSMUST00000021356	6992	-1	ENSMUST00000022614	22608	-1	ENSMUST00000024619	59398	-1	ENSMUST00000025973	81929	-1	ENSMUST00000027675	22201	-1	ENSMUST00000029240	28066	-1	ENSMUST00000030684	2434	-1	ENSMUST00000032180	16129	-1	ENSMUST00000033990	8070	-1
ENSMUST00000066285	1707	1	ENSMUST00000019721	10985	-1	ENSMUST00000021356	7026	-1	ENSMUST00000022614	22849	-1	ENSMUST00000024619	60294	-1	ENSMUST00000025973	88590	-1	ENSMUST00000027675	22213	-1	ENSMUST00000029240	28651	-1	ENSMUST00000030684	2726	-1	ENSMUST00000032180	16995	-1	ENSMUST00000033990	82867	-1
ENSMUST00000066285	3331	1	ENSMUST00000019721	11111	-1	ENSMUST00000021356	7039	-1	ENSMUST00000022614	23543	-1	ENSMUST00000024619	62867	-1	ENSMUST00000025973	9083	-1	ENSMUST00000027675	22491	-1	ENSMUST00000029240	28677	-1	ENSMUST00000030684	3458	-1	ENSMUST00000032180	17202	-1	ENSMUST00000033990	84865	-1
ENSMUST00000066285	3488	1	ENSMUST00000019721	11249	-1	ENSMUST00000021356	7452	-1	ENSMUST00000022614	2371	-1	ENSMUST00000024619	62881	-1	ENSMUST00000025973	95149	-1	ENSMUST00000027675	22883	-1	ENSMUST00000029240	28732	-1	ENSMUST00000030684	3863	-1	ENSMUST00000032180	19231	-1	ENSMUST00000033990	85065	-1
ENSMUST00000066285	3547	1	ENSMUST00000019721	11602	-1	ENSMUST00000021356	8433	-1	ENSMUST00000022614	24049	-1	ENSMUST00000024619	63677	-1	ENSMUST00000025973	97542	-1	ENSMUST00000027675	23247	-1	ENSMUST00000029240	29701	-1	ENSMUST00000030684	3920	-1	ENSMUST00000032180	19318	-1	ENSMUST00000033990	86656	-1
ENSMUST00000066285	3558	1	ENSMUST00000019721	11635	-1	ENSMUST00000021356	851	-1	ENSMUST00000022614	25115	-1	ENSMUST00000024619	70692	-1	ENSMUST00000025979	10003	-1	ENSMUST00000027675	23297	-1	ENSMUST00000029240	30123	-1	ENSMUST00000030684	4390	-1	ENSMUST00000032180	19658	-1	ENSMUST00000033990	90120	-1
ENSMUST00000066285	3709	1	ENSMUST00000019721	1187	-1	ENSMUST00000021356	8538	-1	ENSMUST00000022614	25353	-1	ENSMUST00000024619	73706	-1	ENSMUST00000025979	11117	-1	ENSMUST00000027675	23873	-1	ENSMUST00000029240	3182	-1	ENSMUST00000030684	4603	-1	ENSMUST00000032180	19706	-1	ENSMUST00000033990	95324	-1
ENSMUST00000066285	4068	1	ENSMUST00000019721	12027	-1	ENSMUST00000021356	8694	-1	ENSMUST00000022614	25947	-1	ENSMUST00000024619	73863	-1	ENSMUST00000025979	12618	-1	ENSMUST00000027675	24137	-1	ENSMUST00000029240	3930	-1	ENSMUST00000030684	4930	-1	ENSMUST00000032180	20233	-1	ENSMUST00000033990	97211	-1
ENSMUST00000047511	1545	1	ENSMUST00000019721	12275	-1	ENSMUST00000021356	8761	-1	ENSMUST00000022614	26072	-1	ENSMUST00000024619	77065	-1	ENSMUST00000025979	1307	-1	ENSMUST00000027675	24223	-1	ENSMUST00000029240	3972	-1	ENSMUST00000030684	4966	-1	ENSMUST00000032180	20701	-1	ENSMUST00000033990	97347	-1
ENSMUST00000047511	1658	1	ENSMUST00000019721	12532	-1	ENSMUST00000021356	8784	-1	ENSMUST00000022614	26126	-1	ENSMUST00000024619	77880	-1	ENSMUST00000025979	1324	-1	ENSMUST00000027675	24440	-1	ENSMUST00000029240	5100	-1	ENSMUST00000030684	5164	-1	ENSMUST00000032180	21443	-1	ENSMUST00000033990	98358	-1
ENSMUST00000047511	1672	1	ENSMUST00000019721	12871	-1	ENSMUST00000021356	88	-1	ENSMUST00000022614	26479	-1	ENSMUST00000024619	77908	-1	ENSMUST00000025979	13241	-1	ENSMUST00000027675	24718	-1	ENSMUST00000029240	546	-1	ENSMUST00000030684	569	-1	ENSMUST00000032180	21815	-1	ENSMUST00000034017	10127	-1
ENSMUST00000172821	4353	1	ENSMUST00000019721	1366	-1	ENSMUST00000021356	9148	-1	ENSMUST00000022614	27229	-1	ENSMUST00000024619	80815	-1	ENSMUST00000025979	15766	-1	ENSMUST00000027675	3447	-1	ENSMUST00000029240	5689	-1	ENSMUST00000030684	7622	-1	ENSMUST00000032180	22760	-1	ENSMUST00000034017	102303	-1
ENSMUST00000026084	34927	1	ENSMUST00000019721	1767	-1	ENSMUST00000021368	10275	-1	ENSMUST00000022614	28032	-1	ENSMUST00000024619	82930	-1	ENSMUST00000025979	16859	-1	ENSMUST00000027675	3666	-1	ENSMUST00000029240	6730	-1	ENSMUST00000030684	8462	-1	ENSMUST00000032180	22922	-1	ENSMUST00000034017	102405	-1
ENSMUST00000099274	2395	1	ENSMUST00000019721	1779	-1	ENSMUST00000021368	10310	-1	ENSMUST00000022614	28061	-1	ENSMUST00000024619	84624	-1	ENSMUST00000025979	16995	-1	ENSMUST00000027675	422	-1	ENSMUST00000029240	7084	-1	ENSMUST00000030684	8494	-1	ENSMUST00000032180	2510	-1	ENSMUST00000034017	10250	-1
ENSMUST00000099274	2504	1	ENSMUST00000019721	1966	-1	ENSMUST00000021368	10323	-1	ENSMUST00000022614	28485	-1	ENSMUST00000024619	86558	-1	ENSMUST00000025979	17067	-1	ENSMUST00000027675	4321	-1	ENSMUST00000029240	7364	-1	ENSMUST00000030684	8755	-1	ENSMUST00000032180	25362	-1	ENSMUST00000034017	103886	-1
ENSMUST00000099274	2579	1	ENSMUST00000019721	2177	-1	ENSMUST00000021368	10908	-1	ENSMUST00000022614	28579	-1	ENSMUST00000024619	86841	-1	ENSMUST00000025979	17881	-1	ENSMUST00000027675	503	-1	ENSMUST00000029240	81	-1	ENSMUST00000030684	9094	-1	ENSMUST00000032180	27027	-1	ENSMUST00000034017	106824	-1
ENSMUST00000099274	3468	1	ENSMUST00000019721	2575	-1	ENSMUST00000021368	11259	-1	ENSMUST00000022614	3048	-1	ENSMUST00000024619	86890	-1	ENSMUST00000025979	17949	-1	ENSMUST00000027675	5517	-1	ENSMUST00000029240	8407	-1	ENSMUST00000030684	910	-1	ENSMUST00000032180	27040	-1	ENSMUST00000034017	108915	-1
ENSMUST00000099274	3480	1	ENSMUST00000019721	2704	-1	ENSMUST00000021368	12078	-1	ENSMUST00000022614	4410	-1	ENSMUST00000024619	87072	-1	ENSMUST00000025979	19028	-1	ENSMUST00000027675	5898	-1	ENSMUST00000029240	8808	-1	ENSMUST00000030684	9209	-1	ENSMUST00000032180	27180	-1	ENSMUST00000034017	111190	-1
ENSMUST00000099274	3528	1	ENSMUST00000019721	2720	-1	ENSMUST00000021368	12249	-1	ENSMUST00000022614	4456	-1	ENSMUST00000024619	89248	-1	ENSMUST00000025979	2004	-1	ENSMUST00000027675	6145	-1	ENSMUST00000029240	9298	-1	ENSMUST00000030684	9637	-1	ENSMUST00000032180	28554	-1	ENSMUST00000034017	112354	-1
ENSMUST00000099274	3555	1	ENSMUST00000019721	382	-1	ENSMUST00000021368	15723	-1	ENSMUST00000022614	5263	-1	ENSMUST00000024619	90407	-1	ENSMUST00000025979	20665	-1	ENSMUST00000027675	6714	-1	ENSMUST00000029240	9579	-1	ENSMUST00000030684	9751	-1	ENSMUST00000032180	30575	-1	ENSMUST00000034017	115108	-1
ENSMUST00000099274	3656	1	ENSMUST00000019721	3875	-1	ENSMUST00000021368	17323	-1	ENSMUST00000022614	5301	-1	ENSMUST00000024619	90546	-1	ENSMUST00000025979	21565	-1	ENSMUST00000027675	7361	-1	ENSMUST00000029240	9629	-1	ENSMUST00000030684	9817	-1	ENSMUST00000032180	30638	-1	ENSMUST00000034017	119310	-1
ENSMUST00000099274	3978	1	ENSMUST00000019721	3960	-1	ENSMUST00000021368	17428	-1	ENSMUST00000022614	5360	-1	ENSMUST00000024619	92374	-1	ENSMUST00000025979	23034	-1	ENSMUST00000027675	8082	-1	ENSMUST00000029240	9797	-1	ENSMUST00000030691	103851	-1	ENSMUST00000032180	31767	-1	ENSMUST00000034017	120050	-1
ENSMUST00000099274	4225	1	ENSMUST00000019721	4047	-1	ENSMUST00000021368	18079	-1	ENSMUST00000022614	5643	-1	ENSMUST00000024619	94208	-1	ENSMUST00000025979	2346	-1	ENSMUST00000027675	8284	-1	ENSMUST00000029256	1071	-1	ENSMUST00000030691	108142	-1	ENSMUST00000032180	32553	-1	ENSMUST00000034017	122168	-1
ENSMUST00000099274	4243	1	ENSMUST00000019721	4233	-1	ENSMUST00000021368	18634	-1	ENSMUST00000022614	5730	-1	ENSMUST00000024619	95294	-1	ENSMUST00000025979	23549	-1	ENSMUST00000027675	8291	-1	ENSMUST00000029256	10778	-1	ENSMUST00000030691	11015	-1	ENSMUST00000032180	35745	-1	ENSMUST00000034017	124664	-1
ENSMUST00000099274	4637	1	ENSMUST00000019721	4276	-1	ENSMUST00000021368	18997	-1	ENSMUST00000022614	5962	-1	ENSMUST00000024619	97038	-1	ENSMUST00000025979	23638	-1	ENSMUST00000027675	9075	-1	ENSMUST00000029256	10937	-1	ENSMUST00000030691	111817	-1	ENSMUST00000032180	36047	-1	ENSMUST00000034017	125086	-1
ENSMUST00000099274	4893	1	ENSMUST00000019721	4304	-1	ENSMUST00000021368	20120	-1	ENSMUST00000022614	6166	-1	ENSMUST00000024619	97904	-1	ENSMUST00000025979	24009	-1	ENSMUST00000027675	9866	-1	ENSMUST00000029256	11299	-1	ENSMUST00000030691	112332	-1	ENSMUST00000032180	36710	-1	ENSMUST00000034017	126100	-1
ENSMUST00000099274	5153	1	ENSMUST00000019721	4693	-1	ENSMUST00000021368	20771	-1	ENSMUST00000022614	6584	-1	ENSMUST00000024619	98257	-1	ENSMUST00000025979	24020	-1	ENSMUST00000027682	1090	-1	ENSMUST00000029256	11962	-1	ENSMUST00000030691	127186	-1	ENSMUST00000032180	37105	-1	ENSMUST00000034017	12905	-1
ENSMUST00000099274	5439	1	ENSMUST00000019721	5029	-1	ENSMUST00000021368	2086	-1	ENSMUST00000022614	6951	-1	ENSMUST00000024620	1026	-1	ENSMUST00000025979	24404	-1	ENSMUST00000027682	1267	-1	ENSMUST00000029256	12378	-1	ENSMUST00000030691	12870	-1	ENSMUST00000032180	37518	-1	ENSMUST00000034017	13109	-1
ENSMUST00000099274	2523	1	ENSMUST00000019721	5718	-1	ENSMUST00000021368	22544	-1	ENSMUST00000022614	7372	-1	ENSMUST00000024620	10269	-1	ENSMUST00000025979	24718	-1	ENSMUST00000027682	1316	-1	ENSMUST00000029256	12691	-1	ENSMUST00000030691	129096	-1	ENSMUST00000032180	38310	-1	ENSMUST00000034017	131225	-1
ENSMUST00000099274	4318	1	ENSMUST00000019721	5927	-1	ENSMUST00000021368	23235	-1	ENSMUST00000022614	7700	-1	ENSMUST00000024620	11011	-1	ENSMUST00000025979	25149	-1	ENSMUST00000027682	1434	-1	ENSMUST00000029256	12992	-1	ENSMUST00000030691	129820	-1	ENSMUST00000032180	38356	-1	ENSMUST00000034017	131637	-1
ENSMUST00000099274	4463	1	ENSMUST00000019721	6138	-1	ENSMUST00000021368	23862	-1	ENSMUST00000022614	7736	-1	ENSMUST00000024620	11258	-1	ENSMUST00000025979	25216	-1	ENSMUST00000027682	1519	-1	ENSMUST00000029256	13536	-1	ENSMUST00000030691	134073	-1	ENSMUST00000032180	39055	-1	ENSMUST00000034017	133475	-1
ENSMUST00000062216	111	1	ENSMUST00000019721	6394	-1	ENSMUST00000021368	24428	-1	ENSMUST00000022614	839	-1	ENSMUST00000024620	11587	-1	ENSMUST00000025979	25380	-1	ENSMUST00000027682	1632	-1	ENSMUST00000029256	1547	-1	ENSMUST00000030691	134727	-1	ENSMUST00000032180	40146	-1	ENSMUST00000034017	135703	-1
ENSMUST00000062216	5387	1	ENSMUST00000019721	6485	-1	ENSMUST00000021368	25227	-1	ENSMUST00000022622	100135	-1	ENSMUST00000024620	1217	-1	ENSMUST00000025979	26866	-1	ENSMUST00000027682	1711	-1	ENSMUST00000029256	1601	-1	ENSMUST00000030691	135008	-1	ENSMUST00000032180	4033	-1	ENSMUST00000034017	136583	-1
ENSMUST00000062216	5449	1	ENSMUST00000019721	6501	-1	ENSMUST00000021368	25499	-1	ENSMUST00000022622	100956	-1	ENSMUST00000024620	12558	-1	ENSMUST00000025979	27104	-1	ENSMUST00000027682	2115	-1	ENSMUST00000029256	16318	-1	ENSMUST00000030691	1466	-1	ENSMUST00000032180	40638	-1	ENSMUST00000034017	137922	-1
ENSMUST00000062216	5598	1	ENSMUST00000019721	6626	-1	ENSMUST00000021368	26020	-1	ENSMUST00000022622	101505	-1	ENSMUST00000024620	1269	-1	ENSMUST00000025979	27929	-1	ENSMUST00000027682	223	-1	ENSMUST00000029256	16525	-1	ENSMUST00000030691	151871	-1	ENSMUST00000032180	4414	-1	ENSMUST00000034017	138620	-1
ENSMUST00000062216	5846	1	ENSMUST00000019721	6861	-1	ENSMUST00000021368	27392	-1	ENSMUST00000022622	103054	-1	ENSMUST00000024620	13345	-1	ENSMUST00000025979	28326	-1	ENSMUST00000027682	2472	-1	ENSMUST00000029256	16692	-1	ENSMUST00000030691	155820	-1	ENSMUST00000032180	44481	-1	ENSMUST00000034017	138709	-1
ENSMUST00000062216	6425	1	ENSMUST00000019721	6988	-1	ENSMUST00000021368	27439	-1	ENSMUST00000022622	104965	-1	ENSMUST00000024620	13893	-1	ENSMUST00000025979	2874	-1	ENSMUST00000027682	2501	-1	ENSMUST00000029256	16715	-1	ENSMUST00000030691	159080	-1	ENSMUST00000032180	44588	-1	ENSMUST00000034017	13919	-1
ENSMUST00000171986	4018	1	ENSMUST00000019721	701	-1	ENSMUST00000021368	2778	-1	ENSMUST00000022622	107474	-1	ENSMUST00000024620	1420	-1	ENSMUST00000025979	29143	-1	ENSMUST00000027682	2512	-1	ENSMUST00000029256	16751	-1	ENSMUST00000030691	161483	-1	ENSMUST00000032180	45049	-1	ENSMUST00000034017	139635	-1
ENSMUST00000171986	4160	1	ENSMUST00000019721	7166	-1	ENSMUST00000021368	28556	-1	ENSMUST00000022622	108857	-1	ENSMUST00000024620	15459	-1	ENSMUST00000025979	29200	-1	ENSMUST00000027682	2542	-1	ENSMUST00000029256	17278	-1	ENSMUST00000030691	172682	-1	ENSMUST00000032180	45154	-1	ENSMUST00000034017	139883	-1
ENSMUST00000171986	32834	1	ENSMUST00000019721	7251	-1	ENSMUST00000021368	296	-1	ENSMUST00000022622	112049	-1	ENSMUST00000024620	16332	-1	ENSMUST00000025979	29497	-1	ENSMUST00000027682	2584	-1	ENSMUST00000029256	17462	-1	ENSMUST00000030691	180552	-1	ENSMUST00000032180	45379	-1	ENSMUST00000034017	141854	-1
ENSMUST00000171986	32875	1	ENSMUST00000019721	7337	-1	ENSMUST00000021368	29747	-1	ENSMUST00000022622	119011	-1	ENSMUST00000024620	16986	-1	ENSMUST00000025979	30548	-1	ENSMUST00000027682	2612	-1	ENSMUST00000029256	1757	-1	ENSMUST00000030691	185313	-1	ENSMUST00000032180	45815	-1	ENSMUST00000034017	142175	-1
ENSMUST00000171986	32898	1	ENSMUST00000019721	7502	-1	ENSMUST00000021368	29904	-1	ENSMUST00000022622	119644	-1	ENSMUST00000024620	17044	-1	ENSMUST00000025979	30658	-1	ENSMUST00000027682	2736	-1	ENSMUST00000029256	17576	-1	ENSMUST00000030691	193981	-1	ENSMUST00000032180	47241	-1	ENSMUST00000034017	145851	-1
ENSMUST00000171986	33091	1	ENSMUST00000019721	7895	-1	ENSMUST00000021368	30664	-1	ENSMUST00000022622	120846	-1	ENSMUST00000024620	1707	-1	ENSMUST00000025979	30822	-1	ENSMUST00000027682	2836	-1	ENSMUST00000029256	18736	-1	ENSMUST00000030691	229663	-1	ENSMUST00000032180	609	-1	ENSMUST00000034017	147212	-1
ENSMUST00000081790	4143	1	ENSMUST00000019721	7960	-1	ENSMUST00000021368	31451	-1	ENSMUST00000022622	12278	-1	ENSMUST00000024620	17282	-1	ENSMUST00000025979	31202	-1	ENSMUST00000027682	3039	-1	ENSMUST00000029256	19135	-1	ENSMUST00000030691	24123	-1	ENSMUST00000032180	7719	-1	ENSMUST00000034017	148658	-1
ENSMUST00000081790	4341	1	ENSMUST00000019721	833	-1	ENSMUST00000021368	33039	-1	ENSMUST00000022622	123313	-1	ENSMUST00000024620	18371	-1	ENSMUST00000025979	32593	-1	ENSMUST00000027682	3082	-1	ENSMUST00000029256	19158	-1	ENSMUST00000030691	24202	-1	ENSMUST00000032180	9302	-1	ENSMUST00000034017	151449	-1
ENSMUST00000081790	4167	1	ENSMUST00000019721	8497	-1	ENSMUST00000021368	33246	-1	ENSMUST00000022622	124021	-1	ENSMUST00000024620	18550	-1	ENSMUST00000025979	34338	-1	ENSMUST00000027682	3095	-1	ENSMUST00000029256	19570	-1	ENSMUST00000030691	253231	-1	ENSMUST00000032183	10215	-1	ENSMUST00000034017	154205	-1
ENSMUST00000088237	1049	1	ENSMUST00000019721	8524	-1	ENSMUST00000021368	3353	-1	ENSMUST00000022622	125464	-1	ENSMUST00000024620	18603	-1	ENSMUST00000025979	34478	-1	ENSMUST00000027682	3291	-1	ENSMUST00000029256	20076	-1	ENSMUST00000030691	254256	-1	ENSMUST00000032183	10245	-1	ENSMUST00000034017	16141	-1
ENSMUST00000088237	1249	1	ENSMUST00000019721	8575	-1	ENSMUST00000021368	34350	-1	ENSMUST00000022622	126001	-1	ENSMUST00000024620	18882	-1	ENSMUST00000025979	34786	-1	ENSMUST00000027682	3378	-1	ENSMUST00000029256	20769	-1	ENSMUST00000030691	259578	-1	ENSMUST00000032183	1051	-1	ENSMUST00000034017	16722	-1
ENSMUST00000088237	1439	1	ENSMUST00000019721	8603	-1	ENSMUST00000021368	35452	-1	ENSMUST00000022622	16565	-1	ENSMUST00000024620	19009	-1	ENSMUST00000025979	36342	-1	ENSMUST00000027682	3480	-1	ENSMUST00000029256	20905	-1	ENSMUST00000030691	264793	-1	ENSMUST00000032183	10575	-1	ENSMUST00000034017	17249	-1
ENSMUST00000088237	1482	1	ENSMUST00000019721	8764	-1	ENSMUST00000021368	37418	-1	ENSMUST00000022622	17489	-1	ENSMUST00000024620	19236	-1	ENSMUST00000025979	36823	-1	ENSMUST00000027682	3653	-1	ENSMUST00000029256	21973	-1	ENSMUST00000030691	267624	-1	ENSMUST00000032183	10679	-1	ENSMUST00000034017	22378	-1
ENSMUST00000025955	5524	1	ENSMUST00000019721	8867	-1	ENSMUST00000021368	37429	-1	ENSMUST00000022622	18060	-1	ENSMUST00000024620	19747	-1	ENSMUST00000025979	36983	-1	ENSMUST00000027682	3681	-1	ENSMUST00000029256	22766	-1	ENSMUST00000030691	268412	-1	ENSMUST00000032183	10895	-1	ENSMUST00000034017	22683	-1
ENSMUST00000025955	1001	1	ENSMUST00000019721	9143	-1	ENSMUST00000021368	37634	-1	ENSMUST00000022622	18382	-1	ENSMUST00000024620	2080	-1	ENSMUST00000025979	37526	-1	ENSMUST00000027682	3693	-1	ENSMUST00000029256	22885	-1	ENSMUST00000030691	269708	-1	ENSMUST00000032183	10922	-1	ENSMUST00000034017	28219	-1
ENSMUST00000025955	3028	1	ENSMUST00000019721	9504	-1	ENSMUST00000021368	37809	-1	ENSMUST00000022622	18972	-1	ENSMUST00000024620	3118	-1	ENSMUST00000025979	3757	-1	ENSMUST00000027682	3906	-1	ENSMUST00000029256	23056	-1	ENSMUST00000030691	282609	-1	ENSMUST00000032183	11186	-1	ENSMUST00000034017	31121	-1
ENSMUST00000025955	3057	1	ENSMUST00000019721	9839	-1	ENSMUST00000021368	38663	-1	ENSMUST00000022622	21136	-1	ENSMUST00000024620	3139	-1	ENSMUST00000025979	37852	-1	ENSMUST00000027682	4019	-1	ENSMUST00000029256	23202	-1	ENSMUST00000030691	284523	-1	ENSMUST00000032183	1125	-1	ENSMUST00000034017	33475	-1
ENSMUST00000025955	5565	1	ENSMUST00000019723	1033	-1	ENSMUST00000021368	3887	-1	ENSMUST00000022622	21644	-1	ENSMUST00000024620	3667	-1	ENSMUST00000025979	37954	-1	ENSMUST00000027682	4196	-1	ENSMUST00000029256	23296	-1	ENSMUST00000030691	285443	-1	ENSMUST00000032183	11335	-1	ENSMUST00000034017	33671	-1
ENSMUST00000025955	5580	1	ENSMUST00000019723	1125	-1	ENSMUST00000021368	40815	-1	ENSMUST00000022622	25781	-1	ENSMUST00000024620	3731	-1	ENSMUST00000025979	4805	-1	ENSMUST00000027682	4236	-1	ENSMUST00000029256	24118	-1	ENSMUST00000030691	286344	-1	ENSMUST00000032183	11415	-1	ENSMUST00000034017	35993	-1
ENSMUST00000099260	195	1	ENSMUST00000019723	1597	-1	ENSMUST00000021368	40963	-1	ENSMUST00000022622	30141	-1	ENSMUST00000024620	4279	-1	ENSMUST00000025979	6340	-1	ENSMUST00000027682	4398	-1	ENSMUST00000029256	24231	-1	ENSMUST00000030691	290461	-1	ENSMUST00000032183	11654	-1	ENSMUST00000034017	37739	-1
ENSMUST00000115099	106792	1	ENSMUST00000019723	1712	-1	ENSMUST00000021368	41230	-1	ENSMUST00000022622	30639	-1	ENSMUST00000024620	4638	-1	ENSMUST00000025979	7374	-1	ENSMUST00000027682	446	-1	ENSMUST00000029256	25202	-1	ENSMUST00000030691	292121	-1	ENSMUST00000032183	12171	-1	ENSMUST00000034017	38166	-1
ENSMUST00000115099	107150	1	ENSMUST00000019723	176	-1	ENSMUST00000021368	42265	-1	ENSMUST00000022622	31519	-1	ENSMUST00000024620	4773	-1	ENSMUST00000025979	7614	-1	ENSMUST00000027682	4607	-1	ENSMUST00000029256	25795	-1	ENSMUST00000030691	292947	-1	ENSMUST00000032183	12632	-1	ENSMUST00000034017	4002	-1
ENSMUST00000115099	107162	1	ENSMUST00000019723	1823	-1	ENSMUST00000021368	43643	-1	ENSMUST00000022622	32299	-1	ENSMUST00000024620	4842	-1	ENSMUST00000025979	8413	-1	ENSMUST00000027682	4650	-1	ENSMUST00000029256	25887	-1	ENSMUST00000030691	295067	-1	ENSMUST00000032183	12739	-1	ENSMUST00000034017	44522	-1
ENSMUST00000115099	107672	1	ENSMUST00000019723	1914	-1	ENSMUST00000021368	43880	-1	ENSMUST00000022622	36879	-1	ENSMUST00000024620	5529	-1	ENSMUST00000025979	8632	-1	ENSMUST00000027682	474	-1	ENSMUST00000029256	26096	-1	ENSMUST00000030691	298277	-1	ENSMUST00000032183	12953	-1	ENSMUST00000034017	5369	-1
ENSMUST00000115099	107828	1	ENSMUST00000019723	1993	-1	ENSMUST00000021368	44851	-1	ENSMUST00000022622	37650	-1	ENSMUST00000024620	5994	-1	ENSMUST00000025979	9224	-1	ENSMUST00000027682	4993	-1	ENSMUST00000029256	26360	-1	ENSMUST00000030691	305397	-1	ENSMUST00000032183	13017	-1	ENSMUST00000034017	5565	-1
ENSMUST00000115099	107961	1	ENSMUST00000019723	2039	-1	ENSMUST00000021368	45235	-1	ENSMUST00000022622	37714	-1	ENSMUST00000024620	6047	-1	ENSMUST00000025979	9412	-1	ENSMUST00000027682	5054	-1	ENSMUST00000029256	26639	-1	ENSMUST00000030691	312309	-1	ENSMUST00000032183	13046	-1	ENSMUST00000034017	5671	-1
ENSMUST00000115099	107965	1	ENSMUST00000019723	223	-1	ENSMUST00000021368	45240	-1	ENSMUST00000022622	46699	-1	ENSMUST00000024620	6121	-1	ENSMUST00000025979	9662	-1	ENSMUST00000027682	5064	-1	ENSMUST00000029256	27287	-1	ENSMUST00000030691	315102	-1	ENSMUST00000032183	13067	-1	ENSMUST00000034017	6359	-1
ENSMUST00000115099	108254	1	ENSMUST00000019723	2303	-1	ENSMUST00000021368	4601	-1	ENSMUST00000022622	47141	-1	ENSMUST00000024620	6248	-1	ENSMUST00000025981	10083	-1	ENSMUST00000027682	5158	-1	ENSMUST00000029256	3058	-1	ENSMUST00000030691	324288	-1	ENSMUST00000032183	13509	-1	ENSMUST00000034017	6717	-1
ENSMUST00000115099	108279	1	ENSMUST00000019723	2634	-1	ENSMUST00000021368	5068	-1	ENSMUST00000022622	48148	-1	ENSMUST00000024620	6536	-1	ENSMUST00000025981	1088	-1	ENSMUST00000027682	5263	-1	ENSMUST00000029256	3127	-1	ENSMUST00000030691	324942	-1	ENSMUST00000032183	13552	-1	ENSMUST00000034017	9609	-1
ENSMUST00000115099	108289	1	ENSMUST00000019723	287	-1	ENSMUST00000021368	5365	-1	ENSMUST00000022622	48357	-1	ENSMUST00000024620	6929	-1	ENSMUST00000025981	10960	-1	ENSMUST00000027682	5444	-1	ENSMUST00000029256	337	-1	ENSMUST00000030691	327614	-1	ENSMUST00000032183	13626	-1	ENSMUST00000034017	98248	-1
ENSMUST00000115099	108293	1	ENSMUST00000019723	3044	-1	ENSMUST00000021368	5865	-1	ENSMUST00000022622	48846	-1	ENSMUST00000024620	712	-1	ENSMUST00000025981	10978	-1	ENSMUST00000027682	5693	-1	ENSMUST00000029256	3519	-1	ENSMUST00000030691	329295	-1	ENSMUST00000032183	13780	-1	ENSMUST00000034021	101453	-1
ENSMUST00000115099	108343	1	ENSMUST00000019723	3307	-1	ENSMUST00000021368	7339	-1	ENSMUST00000022622	53698	-1	ENSMUST00000024620	7126	-1	ENSMUST00000025981	11065	-1	ENSMUST00000027682	5784	-1	ENSMUST00000029256	3556	-1	ENSMUST00000030691	331030	-1	ENSMUST00000032183	14040	-1	ENSMUST00000034021	103531	-1
ENSMUST00000115099	108370	1	ENSMUST00000019723	3336	-1	ENSMUST00000021368	7773	-1	ENSMUST00000022622	53857	-1	ENSMUST00000024620	7539	-1	ENSMUST00000025981	11088	-1	ENSMUST00000027682	5799	-1	ENSMUST00000029256	4171	-1	ENSMUST00000030691	334508	-1	ENSMUST00000032183	14131	-1	ENSMUST00000034021	104777	-1
ENSMUST00000115099	108462	1	ENSMUST00000019723	3375	-1	ENSMUST00000021368	9094	-1	ENSMUST00000022622	55542	-1	ENSMUST00000024620	7687	-1	ENSMUST00000025981	11267	-1	ENSMUST00000027682	5816	-1	ENSMUST00000029256	4549	-1	ENSMUST00000030691	335637	-1	ENSMUST00000032183	14393	-1	ENSMUST00000034021	104946	-1
ENSMUST00000115099	108527	1	ENSMUST00000019723	3649	-1	ENSMUST00000021368	9460	-1	ENSMUST00000022622	57101	-1	ENSMUST00000024620	7871	-1	ENSMUST00000025981	11492	-1	ENSMUST00000027682	5898	-1	ENSMUST00000029256	6252	-1	ENSMUST00000030691	336199	-1	ENSMUST00000032183	1472	-1	ENSMUST00000034021	106929	-1
ENSMUST00000115099	108931	1	ENSMUST00000019723	3779	-1	ENSMUST00000021368	9697	-1	ENSMUST00000022622	57568	-1	ENSMUST00000024620	7897	-1	ENSMUST00000025981	11750	-1	ENSMUST00000027682	6109	-1	ENSMUST00000029256	6420	-1	ENSMUST00000030691	52309	-1	ENSMUST00000032183	1589	-1	ENSMUST00000034021	109930	-1
ENSMUST00000062672	208	1	ENSMUST00000019723	3796	-1	ENSMUST00000021370	12336	-1	ENSMUST00000022622	59579	-1	ENSMUST00000024620	8364	-1	ENSMUST00000025981	11877	-1	ENSMUST00000027682	6234	-1	ENSMUST00000029256	68	-1	ENSMUST00000030691	53007	-1	ENSMUST00000032183	1838	-1	ENSMUST00000034021	116628	-1
ENSMUST00000062672	270	1	ENSMUST00000019723	403	-1	ENSMUST00000021370	13681	-1	ENSMUST00000022622	60121	-1	ENSMUST00000024620	8389	-1	ENSMUST00000025981	11993	-1	ENSMUST00000027682	6449	-1	ENSMUST00000029256	6878	-1	ENSMUST00000030691	64353	-1	ENSMUST00000032183	2329	-1	ENSMUST00000034021	118475	-1
ENSMUST00000062672	320	1	ENSMUST00000019723	4067	-1	ENSMUST00000021370	13781	-1	ENSMUST00000022622	60239	-1	ENSMUST00000024620	8447	-1	ENSMUST00000025981	12005	-1	ENSMUST00000027682	674	-1	ENSMUST00000029256	7225	-1	ENSMUST00000030691	65919	-1	ENSMUST00000032183	3031	-1	ENSMUST00000034021	118841	-1
ENSMUST00000062672	368	1	ENSMUST00000019723	4109	-1	ENSMUST00000021370	14183	-1	ENSMUST00000022622	60992	-1	ENSMUST00000024620	8501	-1	ENSMUST00000025981	12334	-1	ENSMUST00000027682	6931	-1	ENSMUST00000029256	7353	-1	ENSMUST00000030691	66380	-1	ENSMUST00000032183	3248	-1	ENSMUST00000034021	120207	-1
ENSMUST00000062672	748	1	ENSMUST00000019723	4299	-1	ENSMUST00000021370	14459	-1	ENSMUST00000022622	61709	-1	ENSMUST00000024620	8592	-1	ENSMUST00000025981	12493	-1	ENSMUST00000027682	7137	-1	ENSMUST00000029256	7557	-1	ENSMUST00000030691	6747	-1	ENSMUST00000032183	3582	-1	ENSMUST00000034021	123167	-1
ENSMUST00000061852	28898	1	ENSMUST00000019723	439	-1	ENSMUST00000021370	14909	-1	ENSMUST00000022622	64821	-1	ENSMUST00000024620	9222	-1	ENSMUST00000025981	12669	-1	ENSMUST00000027682	7231	-1	ENSMUST00000029256	7629	-1	ENSMUST00000030691	73978	-1	ENSMUST00000032183	3654	-1	ENSMUST00000034021	125135	-1
ENSMUST00000061852	30578	1	ENSMUST00000019723	4448	-1	ENSMUST00000021370	15013	-1	ENSMUST00000022622	6676	-1	ENSMUST00000024620	9281	-1	ENSMUST00000025981	13272	-1	ENSMUST00000027682	7412	-1	ENSMUST00000029256	7798	-1	ENSMUST00000030691	87672	-1	ENSMUST00000032183	3732	-1	ENSMUST00000034021	126752	-1
ENSMUST00000061852	30588	1	ENSMUST00000019723	4456	-1	ENSMUST00000021370	15414	-1	ENSMUST00000022622	67797	-1	ENSMUST00000024620	945	-1	ENSMUST00000025981	13761	-1	ENSMUST00000027682	845	-1	ENSMUST00000029256	8420	-1	ENSMUST00000030691	93370	-1	ENSMUST00000032183	3896	-1	ENSMUST00000034021	13377	-1
ENSMUST00000056700	2606	1	ENSMUST00000019723	4527	-1	ENSMUST00000021370	16029	-1	ENSMUST00000022622	68658	-1	ENSMUST00000024620	9565	-1	ENSMUST00000025981	13843	-1	ENSMUST00000027682	946	-1	ENSMUST00000029256	9498	-1	ENSMUST00000030691	94267	-1	ENSMUST00000032183	4015	-1	ENSMUST00000034021	15931	-1
ENSMUST00000027965	66285	1	ENSMUST00000019723	4885	-1	ENSMUST00000021370	16590	-1	ENSMUST00000022622	69761	-1	ENSMUST00000024627	11147	-1	ENSMUST00000025981	13847	-1	ENSMUST00000027688	11177	-1	ENSMUST00000029271	11648	-1	ENSMUST00000030691	96995	-1	ENSMUST00000032183	4280	-1	ENSMUST00000034021	17878	-1
ENSMUST00000027965	66371	1	ENSMUST00000019723	5209	-1	ENSMUST00000021370	16594	-1	ENSMUST00000022622	70324	-1	ENSMUST00000024627	1150	-1	ENSMUST00000025981	13859	-1	ENSMUST00000027688	11357	-1	ENSMUST00000029271	1209	-1	ENSMUST00000030702	10417	-1	ENSMUST00000032183	433	-1	ENSMUST00000034021	19084	-1
ENSMUST00000027965	66377	1	ENSMUST00000019723	5394	-1	ENSMUST00000021370	17352	-1	ENSMUST00000022622	70693	-1	ENSMUST00000024627	11761	-1	ENSMUST00000025981	14066	-1	ENSMUST00000027688	1272	-1	ENSMUST00000029271	1234	-1	ENSMUST00000030702	10484	-1	ENSMUST00000032183	4500	-1	ENSMUST00000034021	20315	-1
ENSMUST00000027965	66269	1	ENSMUST00000019723	5442	-1	ENSMUST00000021370	18862	-1	ENSMUST00000022622	7140	-1	ENSMUST00000024627	13864	-1	ENSMUST00000025981	14103	-1	ENSMUST00000027688	12746	-1	ENSMUST00000029271	12631	-1	ENSMUST00000030702	10915	-1	ENSMUST00000032183	4519	-1	ENSMUST00000034021	26938	-1
ENSMUST00000027965	66399	1	ENSMUST00000019723	5693	-1	ENSMUST00000021370	19082	-1	ENSMUST00000022622	72796	-1	ENSMUST00000024627	14742	-1	ENSMUST00000025981	14364	-1	ENSMUST00000027688	14121	-1	ENSMUST00000029271	12986	-1	ENSMUST00000030702	11083	-1	ENSMUST00000032183	4630	-1	ENSMUST00000034021	26946	-1
ENSMUST00000027965	66411	1	ENSMUST00000019723	57	-1	ENSMUST00000021370	19954	-1	ENSMUST00000022622	79506	-1	ENSMUST00000024627	15503	-1	ENSMUST00000025981	14641	-1	ENSMUST00000027688	17939	-1	ENSMUST00000029271	1303	-1	ENSMUST00000030702	11425	-1	ENSMUST00000032183	4792	-1	ENSMUST00000034021	29151	-1
ENSMUST00000075767	202504	1	ENSMUST00000019723	5760	-1	ENSMUST00000021370	20179	-1	ENSMUST00000022622	80544	-1	ENSMUST00000024627	16212	-1	ENSMUST00000025981	15041	-1	ENSMUST00000027688	19477	-1	ENSMUST00000029271	13307	-1	ENSMUST00000030702	11627	-1	ENSMUST00000032183	587	-1	ENSMUST00000034021	3158	-1
ENSMUST00000075767	202507	1	ENSMUST00000019723	6076	-1	ENSMUST00000021370	20371	-1	ENSMUST00000022622	80727	-1	ENSMUST00000024627	17187	-1	ENSMUST00000025981	15219	-1	ENSMUST00000027688	19806	-1	ENSMUST00000029271	13355	-1	ENSMUST00000030702	11784	-1	ENSMUST00000032183	6179	-1	ENSMUST00000034021	35360	-1
ENSMUST00000075767	202570	1	ENSMUST00000019723	6216	-1	ENSMUST00000021370	20403	-1	ENSMUST00000022622	91115	-1	ENSMUST00000024627	17216	-1	ENSMUST00000025981	15412	-1	ENSMUST00000027688	20107	-1	ENSMUST00000029271	1516	-1	ENSMUST00000030702	1196	-1	ENSMUST00000032183	6215	-1	ENSMUST00000034021	37349	-1
ENSMUST00000075767	202630	1	ENSMUST00000019723	6383	-1	ENSMUST00000021370	22355	-1	ENSMUST00000022622	93235	-1	ENSMUST00000024627	20959	-1	ENSMUST00000025981	15444	-1	ENSMUST00000027688	20533	-1	ENSMUST00000029271	15603	-1	ENSMUST00000030702	12353	-1	ENSMUST00000032183	6428	-1	ENSMUST00000034021	37866	-1
ENSMUST00000075767	210250	1	ENSMUST00000019723	6462	-1	ENSMUST00000021370	22440	-1	ENSMUST00000022622	95997	-1	ENSMUST00000024627	21248	-1	ENSMUST00000025981	15716	-1	ENSMUST00000027688	23478	-1	ENSMUST00000029271	15828	-1	ENSMUST00000030702	12395	-1	ENSMUST00000032183	6446	-1	ENSMUST00000034021	38105	-1
ENSMUST00000075767	210393	1	ENSMUST00000019723	6493	-1	ENSMUST00000021370	23200	-1	ENSMUST00000022622	97428	-1	ENSMUST00000024627	21784	-1	ENSMUST00000025981	15772	-1	ENSMUST00000027688	24248	-1	ENSMUST00000029271	16423	-1	ENSMUST00000030702	12501	-1	ENSMUST00000032183	6791	-1	ENSMUST00000034021	38411	-1
ENSMUST00000075767	210669	1	ENSMUST00000019723	6622	-1	ENSMUST00000021370	23853	-1	ENSMUST00000022622	98232	-1	ENSMUST00000024627	22109	-1	ENSMUST00000025981	2222	-1	ENSMUST00000027688	25727	-1	ENSMUST00000029271	17988	-1	ENSMUST00000030702	12602	-1	ENSMUST00000032183	7356	-1	ENSMUST00000034021	38548	-1
ENSMUST00000075767	210815	1	ENSMUST00000019723	6725	-1	ENSMUST00000021370	24065	-1	ENSMUST00000022623	10199	-1	ENSMUST00000024627	23072	-1	ENSMUST00000025981	2386	-1	ENSMUST00000027688	26065	-1	ENSMUST00000029271	18074	-1	ENSMUST00000030702	12846	-1	ENSMUST00000032183	7888	-1	ENSMUST00000034021	39428	-1
ENSMUST00000075767	210819	1	ENSMUST00000019723	6881	-1	ENSMUST00000021370	24557	-1	ENSMUST00000022623	10249	-1	ENSMUST00000024627	23670	-1	ENSMUST00000025981	3526	-1	ENSMUST00000027688	26781	-1	ENSMUST00000029271	20277	-1	ENSMUST00000030702	13061	-1	ENSMUST00000032183	7918	-1	ENSMUST00000034021	46220	-1
ENSMUST00000075767	210829	1	ENSMUST00000019723	6997	-1	ENSMUST00000021370	25587	-1	ENSMUST00000022623	10907	-1	ENSMUST00000024627	24727	-1	ENSMUST00000025981	3994	-1	ENSMUST00000027688	26980	-1	ENSMUST00000029271	20602	-1	ENSMUST00000030702	13195	-1	ENSMUST00000032183	8248	-1	ENSMUST00000034021	48437	-1
ENSMUST00000075767	210871	1	ENSMUST00000019723	7045	-1	ENSMUST00000021370	28534	-1	ENSMUST00000022623	10938	-1	ENSMUST00000024627	24918	-1	ENSMUST00000025981	4039	-1	ENSMUST00000027688	27784	-1	ENSMUST00000029271	22297	-1	ENSMUST00000030702	13294	-1	ENSMUST00000032183	8449	-1	ENSMUST00000034021	56460	-1
ENSMUST00000075767	210886	1	ENSMUST00000019723	7193	-1	ENSMUST00000021370	28757	-1	ENSMUST00000022623	11248	-1	ENSMUST00000024627	25828	-1	ENSMUST00000025981	4194	-1	ENSMUST00000027688	2809	-1	ENSMUST00000029271	22419	-1	ENSMUST00000030702	13429	-1	ENSMUST00000032183	8462	-1	ENSMUST00000034021	56808	-1
ENSMUST00000075767	210913	1	ENSMUST00000019723	7528	-1	ENSMUST00000021370	29615	-1	ENSMUST00000022623	11361	-1	ENSMUST00000024627	26339	-1	ENSMUST00000025981	4423	-1	ENSMUST00000027688	28853	-1	ENSMUST00000029271	22623	-1	ENSMUST00000030702	13449	-1	ENSMUST00000032183	9047	-1	ENSMUST00000034021	5808	-1
ENSMUST00000075767	211167	1	ENSMUST00000019723	7873	-1	ENSMUST00000021370	29841	-1	ENSMUST00000022623	11438	-1	ENSMUST00000024627	26603	-1	ENSMUST00000025981	4858	-1	ENSMUST00000027688	2980	-1	ENSMUST00000029271	23857	-1	ENSMUST00000030702	13697	-1	ENSMUST00000032183	9071	-1	ENSMUST00000034021	58578	-1
ENSMUST00000075767	211226	1	ENSMUST00000019723	7898	-1	ENSMUST00000021370	30913	-1	ENSMUST00000022623	11638	-1	ENSMUST00000024627	28715	-1	ENSMUST00000025981	49	-1	ENSMUST00000027688	31750	-1	ENSMUST00000029271	24425	-1	ENSMUST00000030702	1415	-1	ENSMUST00000032183	9148	-1	ENSMUST00000034021	60159	-1
ENSMUST00000075767	211738	1	ENSMUST00000019723	7926	-1	ENSMUST00000021370	31039	-1	ENSMUST00000022623	11759	-1	ENSMUST00000024627	29144	-1	ENSMUST00000025981	4906	-1	ENSMUST00000027688	32340	-1	ENSMUST00000029271	25487	-1	ENSMUST00000030702	14609	-1	ENSMUST00000032183	9989	-1	ENSMUST00000034021	60395	-1
ENSMUST00000035721	1470	1	ENSMUST00000019723	808	-1	ENSMUST00000021370	31111	-1	ENSMUST00000022623	1198	-1	ENSMUST00000024627	30018	-1	ENSMUST00000025981	5148	-1	ENSMUST00000027688	3305	-1	ENSMUST00000029271	2690	-1	ENSMUST00000030702	14647	-1	ENSMUST00000032191	11585	-1	ENSMUST00000034021	61254	-1
ENSMUST00000035721	2259	1	ENSMUST00000019723	8134	-1	ENSMUST00000021370	31746	-1	ENSMUST00000022623	12152	-1	ENSMUST00000024627	30585	-1	ENSMUST00000025981	5247	-1	ENSMUST00000027688	33406	-1	ENSMUST00000029271	27070	-1	ENSMUST00000030702	15111	-1	ENSMUST00000032191	12538	-1	ENSMUST00000034021	64303	-1
ENSMUST00000035721	2228	1	ENSMUST00000019723	912	-1	ENSMUST00000021370	31772	-1	ENSMUST00000022623	12735	-1	ENSMUST00000024627	30912	-1	ENSMUST00000025981	5272	-1	ENSMUST00000027688	36842	-1	ENSMUST00000029271	27302	-1	ENSMUST00000030702	15166	-1	ENSMUST00000032191	17460	-1	ENSMUST00000034021	64913	-1
ENSMUST00000035721	2250	1	ENSMUST00000019723	975	-1	ENSMUST00000021370	32587	-1	ENSMUST00000022623	13174	-1	ENSMUST00000024627	33077	-1	ENSMUST00000025981	6264	-1	ENSMUST00000027688	37023	-1	ENSMUST00000029271	28478	-1	ENSMUST00000030702	15248	-1	ENSMUST00000032191	19897	-1	ENSMUST00000034021	65173	-1
ENSMUST00000027973	25135	1	ENSMUST00000019791	105940	-1	ENSMUST00000021370	32933	-1	ENSMUST00000022623	1334	-1	ENSMUST00000024627	3342	-1	ENSMUST00000025981	6775	-1	ENSMUST00000027688	37293	-1	ENSMUST00000029271	29214	-1	ENSMUST00000030702	15360	-1	ENSMUST00000032191	20253	-1	ENSMUST00000034021	66154	-1
ENSMUST00000027973	25300	1	ENSMUST00000019791	10672	-1	ENSMUST00000021370	33357	-1	ENSMUST00000022623	13544	-1	ENSMUST00000024627	33645	-1	ENSMUST00000025981	6789	-1	ENSMUST00000027688	37383	-1	ENSMUST00000029271	33750	-1	ENSMUST00000030702	15377	-1	ENSMUST00000032191	2035	-1	ENSMUST00000034021	67223	-1
ENSMUST00000027973	25309	1	ENSMUST00000019791	10746	-1	ENSMUST00000021370	33680	-1	ENSMUST00000022623	13668	-1	ENSMUST00000024627	37062	-1	ENSMUST00000025981	6841	-1	ENSMUST00000027688	3871	-1	ENSMUST00000029271	33908	-1	ENSMUST00000030702	15868	-1	ENSMUST00000032191	20922	-1	ENSMUST00000034021	69878	-1
ENSMUST00000027973	25414	1	ENSMUST00000019791	110192	-1	ENSMUST00000021370	34181	-1	ENSMUST00000022623	1377	-1	ENSMUST00000024627	37338	-1	ENSMUST00000025981	6915	-1	ENSMUST00000027688	40317	-1	ENSMUST00000029271	34485	-1	ENSMUST00000030702	159	-1	ENSMUST00000032191	2110	-1	ENSMUST00000034021	75647	-1
ENSMUST00000027973	26782	1	ENSMUST00000019791	110311	-1	ENSMUST00000021370	34227	-1	ENSMUST00000022623	13824	-1	ENSMUST00000024627	37536	-1	ENSMUST00000025981	7140	-1	ENSMUST00000027688	40829	-1	ENSMUST00000029271	35038	-1	ENSMUST00000030702	1612	-1	ENSMUST00000032191	21818	-1	ENSMUST00000034021	76895	-1
ENSMUST00000027973	26842	1	ENSMUST00000019791	112173	-1	ENSMUST00000021370	3428	-1	ENSMUST00000022623	14269	-1	ENSMUST00000024627	38702	-1	ENSMUST00000025981	7208	-1	ENSMUST00000027688	41566	-1	ENSMUST00000029271	35387	-1	ENSMUST00000030702	16203	-1	ENSMUST00000032191	24218	-1	ENSMUST00000034021	77061	-1
ENSMUST00000027973	26054	1	ENSMUST00000019791	123312	-1	ENSMUST00000021370	3835	-1	ENSMUST00000022623	1747	-1	ENSMUST00000024627	39304	-1	ENSMUST00000025981	726	-1	ENSMUST00000027688	42346	-1	ENSMUST00000029271	36691	-1	ENSMUST00000030702	1691	-1	ENSMUST00000032191	25366	-1	ENSMUST00000034021	78307	-1
ENSMUST00000027973	26831	1	ENSMUST00000019791	13926	-1	ENSMUST00000021370	4728	-1	ENSMUST00000022623	1982	-1	ENSMUST00000024627	39612	-1	ENSMUST00000025981	7314	-1	ENSMUST00000027688	43235	-1	ENSMUST00000029271	38556	-1	ENSMUST00000030702	2475	-1	ENSMUST00000032191	27072	-1	ENSMUST00000034021	78603	-1
ENSMUST00000027975	19503	1	ENSMUST00000019791	21729	-1	ENSMUST00000021370	4742	-1	ENSMUST00000022623	2243	-1	ENSMUST00000024627	39758	-1	ENSMUST00000025981	8363	-1	ENSMUST00000027688	44555	-1	ENSMUST00000029271	38744	-1	ENSMUST00000030702	272	-1	ENSMUST00000032191	27497	-1	ENSMUST00000034021	78758	-1
ENSMUST00000027975	19521	1	ENSMUST00000019791	22881	-1	ENSMUST00000021370	542	-1	ENSMUST00000022623	2764	-1	ENSMUST00000024627	44008	-1	ENSMUST00000025981	8404	-1	ENSMUST00000027688	44944	-1	ENSMUST00000029271	40371	-1	ENSMUST00000030702	3359	-1	ENSMUST00000032191	28185	-1	ENSMUST00000034021	79736	-1
ENSMUST00000102985	1429	1	ENSMUST00000019791	26663	-1	ENSMUST00000021370	6394	-1	ENSMUST00000022623	2904	-1	ENSMUST00000024627	46532	-1	ENSMUST00000025981	9111	-1	ENSMUST00000027688	45933	-1	ENSMUST00000029271	40579	-1	ENSMUST00000030702	3755	-1	ENSMUST00000032191	29371	-1	ENSMUST00000034021	82027	-1
ENSMUST00000102985	1448	1	ENSMUST00000019791	2832	-1	ENSMUST00000021370	6466	-1	ENSMUST00000022623	3112	-1	ENSMUST00000024627	47484	-1	ENSMUST00000025981	9177	-1	ENSMUST00000027688	46192	-1	ENSMUST00000029271	40986	-1	ENSMUST00000030702	3763	-1	ENSMUST00000032191	30212	-1	ENSMUST00000034021	85461	-1
ENSMUST00000142354	91319	1	ENSMUST00000019791	3006	-1	ENSMUST00000021370	7342	-1	ENSMUST00000022623	3203	-1	ENSMUST00000024627	47622	-1	ENSMUST00000025981	9185	-1	ENSMUST00000027688	46754	-1	ENSMUST00000029271	42035	-1	ENSMUST00000030702	3951	-1	ENSMUST00000032191	30688	-1	ENSMUST00000034021	87171	-1
ENSMUST00000044009	1041	1	ENSMUST00000019791	31692	-1	ENSMUST00000021370	7551	-1	ENSMUST00000022623	3350	-1	ENSMUST00000024627	47752	-1	ENSMUST00000025981	9244	-1	ENSMUST00000027688	47476	-1	ENSMUST00000029271	47049	-1	ENSMUST00000030702	4185	-1	ENSMUST00000032191	3294	-1	ENSMUST00000034021	95225	-1
ENSMUST00000044009	1045	1	ENSMUST00000019791	35037	-1	ENSMUST00000021370	7891	-1	ENSMUST00000022623	3531	-1	ENSMUST00000024627	4779	-1	ENSMUST00000025981	9466	-1	ENSMUST00000027688	48549	-1	ENSMUST00000029271	47702	-1	ENSMUST00000030702	477	-1	ENSMUST00000032191	34449	-1	ENSMUST00000034021	97849	-1
ENSMUST00000044009	1100	1	ENSMUST00000019791	35819	-1	ENSMUST00000021370	8432	-1	ENSMUST00000022623	3666	-1	ENSMUST00000024627	48617	-1	ENSMUST00000025983	10193	-1	ENSMUST00000027688	48817	-1	ENSMUST00000029271	48781	-1	ENSMUST00000030702	5645	-1	ENSMUST00000032191	3576	-1	ENSMUST00000034021	98025	-1
ENSMUST00000044009	4276	1	ENSMUST00000019791	36412	-1	ENSMUST00000021370	9315	-1	ENSMUST00000022623	4365	-1	ENSMUST00000024627	5009	-1	ENSMUST00000025983	10231	-1	ENSMUST00000027688	49641	-1	ENSMUST00000029271	49519	-1	ENSMUST00000030702	5878	-1	ENSMUST00000032191	3616	-1	ENSMUST00000034026	10055	-1
ENSMUST00000044009	4664	1	ENSMUST00000019791	40728	-1	ENSMUST00000021370	9527	-1	ENSMUST00000022623	4542	-1	ENSMUST00000024627	50179	-1	ENSMUST00000025983	11244	-1	ENSMUST00000027688	50029	-1	ENSMUST00000029271	50323	-1	ENSMUST00000030702	6063	-1	ENSMUST00000032191	36807	-1	ENSMUST00000034026	10089	-1
ENSMUST00000044009	5333	1	ENSMUST00000019791	43125	-1	ENSMUST00000021372	10132	-1	ENSMUST00000022623	4610	-1	ENSMUST00000024627	50361	-1	ENSMUST00000025983	12823	-1	ENSMUST00000027688	51495	-1	ENSMUST00000029271	50520	-1	ENSMUST00000030702	6099	-1	ENSMUST00000032191	37625	-1	ENSMUST00000034026	10345	-1
ENSMUST00000044009	5346	1	ENSMUST00000019791	49240	-1	ENSMUST00000021372	10249	-1	ENSMUST00000022623	512	-1	ENSMUST00000024627	50775	-1	ENSMUST00000025983	13261	-1	ENSMUST00000027688	52046	-1	ENSMUST00000029271	50980	-1	ENSMUST00000030702	636	-1	ENSMUST00000032191	39591	-1	ENSMUST00000034026	11486	-1
ENSMUST00000044009	5337	1	ENSMUST00000019791	49848	-1	ENSMUST00000021372	11262	-1	ENSMUST00000022623	5125	-1	ENSMUST00000024627	52375	-1	ENSMUST00000025983	13354	-1	ENSMUST00000027688	52890	-1	ENSMUST00000029271	51543	-1	ENSMUST00000030702	641	-1	ENSMUST00000032191	39700	-1	ENSMUST00000034026	12329	-1
ENSMUST00000044009	5414	1	ENSMUST00000019791	5194	-1	ENSMUST00000021372	1210	-1	ENSMUST00000022623	5240	-1	ENSMUST00000024627	52697	-1	ENSMUST00000025983	13477	-1	ENSMUST00000027688	5407	-1	ENSMUST00000029271	52998	-1	ENSMUST00000030702	666	-1	ENSMUST00000032191	39812	-1	ENSMUST00000034026	1255	-1
ENSMUST00000043864	15493	1	ENSMUST00000019791	54765	-1	ENSMUST00000021372	12204	-1	ENSMUST00000022623	5478	-1	ENSMUST00000024627	54565	-1	ENSMUST00000025983	13627	-1	ENSMUST00000027688	55837	-1	ENSMUST00000029271	53785	-1	ENSMUST00000030702	7119	-1	ENSMUST00000032191	44211	-1	ENSMUST00000034026	12745	-1
ENSMUST00000095147	2494	1	ENSMUST00000019791	54883	-1	ENSMUST00000021372	12763	-1	ENSMUST00000022623	5509	-1	ENSMUST00000024627	56219	-1	ENSMUST00000025983	14463	-1	ENSMUST00000027688	56676	-1	ENSMUST00000029271	54090	-1	ENSMUST00000030702	7251	-1	ENSMUST00000032191	44473	-1	ENSMUST00000034026	13304	-1
ENSMUST00000095147	2471	1	ENSMUST00000019791	57690	-1	ENSMUST00000021372	12802	-1	ENSMUST00000022623	5580	-1	ENSMUST00000024627	56491	-1	ENSMUST00000025983	14503	-1	ENSMUST00000027688	58545	-1	ENSMUST00000029271	55025	-1	ENSMUST00000030702	7503	-1	ENSMUST00000032191	44804	-1	ENSMUST00000034026	14045	-1
ENSMUST00000095147	2504	1	ENSMUST00000019791	58504	-1	ENSMUST00000021372	12866	-1	ENSMUST00000022623	5964	-1	ENSMUST00000024627	56505	-1	ENSMUST00000025983	14946	-1	ENSMUST00000027688	58961	-1	ENSMUST00000029271	57187	-1	ENSMUST00000030702	7821	-1	ENSMUST00000032191	44996	-1	ENSMUST00000034026	14106	-1
ENSMUST00000060092	9637	1	ENSMUST00000019791	59614	-1	ENSMUST00000021372	12870	-1	ENSMUST00000022623	6648	-1	ENSMUST00000024627	59059	-1	ENSMUST00000025983	15150	-1	ENSMUST00000027688	60077	-1	ENSMUST00000029271	61399	-1	ENSMUST00000030702	8713	-1	ENSMUST00000032191	45688	-1	ENSMUST00000034026	14174	-1
ENSMUST00000060092	9865	1	ENSMUST00000019791	63168	-1	ENSMUST00000021372	132	-1	ENSMUST00000022623	6766	-1	ENSMUST00000024627	59310	-1	ENSMUST00000025983	15535	-1	ENSMUST00000027688	60977	-1	ENSMUST00000029271	63991	-1	ENSMUST00000030702	9488	-1	ENSMUST00000032191	46792	-1	ENSMUST00000034026	14363	-1
ENSMUST00000060092	9889	1	ENSMUST00000019791	63749	-1	ENSMUST00000021372	13573	-1	ENSMUST00000022623	7194	-1	ENSMUST00000024627	59923	-1	ENSMUST00000025983	15566	-1	ENSMUST00000027688	62110	-1	ENSMUST00000029271	6426	-1	ENSMUST00000030702	9760	-1	ENSMUST00000032191	4756	-1	ENSMUST00000034026	14395	-1
ENSMUST00000060092	104351	1	ENSMUST00000019791	63780	-1	ENSMUST00000021372	13857	-1	ENSMUST00000022623	7271	-1	ENSMUST00000024627	61796	-1	ENSMUST00000025983	16049	-1	ENSMUST00000027688	62367	-1	ENSMUST00000029271	64647	-1	ENSMUST00000030702	9779	-1	ENSMUST00000032191	47686	-1	ENSMUST00000034026	14490	-1
ENSMUST00000060092	104650	1	ENSMUST00000019791	64808	-1	ENSMUST00000021372	13880	-1	ENSMUST00000022623	7815	-1	ENSMUST00000024627	62230	-1	ENSMUST00000025983	1629	-1	ENSMUST00000027688	62739	-1	ENSMUST00000029271	65058	-1	ENSMUST00000030702	9956	-1	ENSMUST00000032191	49823	-1	ENSMUST00000034026	15639	-1
ENSMUST00000060092	9630	1	ENSMUST00000019791	65596	-1	ENSMUST00000021372	14144	-1	ENSMUST00000022623	7931	-1	ENSMUST00000024627	63316	-1	ENSMUST00000025983	16448	-1	ENSMUST00000027688	63710	-1	ENSMUST00000029271	66532	-1	ENSMUST00000030702	9965	-1	ENSMUST00000032191	50150	-1	ENSMUST00000034026	16021	-1
ENSMUST00000054254	917	1	ENSMUST00000019791	67076	-1	ENSMUST00000021372	14828	-1	ENSMUST00000022623	8320	-1	ENSMUST00000024627	65023	-1	ENSMUST00000025983	16491	-1	ENSMUST00000027688	63923	-1	ENSMUST00000029271	68775	-1	ENSMUST00000030714	100704	-1	ENSMUST00000032191	50736	-1	ENSMUST00000034026	16099	-1
ENSMUST00000054254	297	1	ENSMUST00000019791	69230	-1	ENSMUST00000021372	1507	-1	ENSMUST00000022623	8424	-1	ENSMUST00000024627	6546	-1	ENSMUST00000025983	16659	-1	ENSMUST00000027688	65760	-1	ENSMUST00000029271	7345	-1	ENSMUST00000030714	10176	-1	ENSMUST00000032191	51335	-1	ENSMUST00000034026	16332	-1
ENSMUST00000114937	117966	1	ENSMUST00000019791	71689	-1	ENSMUST00000021372	15333	-1	ENSMUST00000022623	8632	-1	ENSMUST00000024627	6671	-1	ENSMUST00000025983	17131	-1	ENSMUST00000027688	66969	-1	ENSMUST00000029271	8118	-1	ENSMUST00000030714	116971	-1	ENSMUST00000032191	51699	-1	ENSMUST00000034026	17224	-1
ENSMUST00000114937	118077	1	ENSMUST00000019791	72386	-1	ENSMUST00000021372	15405	-1	ENSMUST00000022623	8764	-1	ENSMUST00000024627	66998	-1	ENSMUST00000025983	2005	-1	ENSMUST00000027688	67231	-1	ENSMUST00000029271	8167	-1	ENSMUST00000030714	121608	-1	ENSMUST00000032191	52572	-1	ENSMUST00000034026	17259	-1
ENSMUST00000114937	118105	1	ENSMUST00000019791	7241	-1	ENSMUST00000021372	16126	-1	ENSMUST00000022623	8796	-1	ENSMUST00000024627	7642	-1	ENSMUST00000025983	2095	-1	ENSMUST00000027688	67962	-1	ENSMUST00000029271	9299	-1	ENSMUST00000030714	127938	-1	ENSMUST00000032191	56552	-1	ENSMUST00000034026	18742	-1
ENSMUST00000114937	118265	1	ENSMUST00000019791	74	-1	ENSMUST00000021372	16503	-1	ENSMUST00000022623	8802	-1	ENSMUST00000024627	7881	-1	ENSMUST00000025983	2146	-1	ENSMUST00000027688	68031	-1	ENSMUST00000029297	10213	-1	ENSMUST00000030714	133154	-1	ENSMUST00000032191	59214	-1	ENSMUST00000034026	18760	-1
ENSMUST00000114937	118314	1	ENSMUST00000019791	75080	-1	ENSMUST00000021372	16624	-1	ENSMUST00000022623	9563	-1	ENSMUST00000024627	9502	-1	ENSMUST00000025983	2317	-1	ENSMUST00000027688	6915	-1	ENSMUST00000029297	13290	-1	ENSMUST00000030714	13462	-1	ENSMUST00000032191	5975	-1	ENSMUST00000034026	19203	-1
ENSMUST00000114937	118324	1	ENSMUST00000019791	76240	-1	ENSMUST00000021372	16710	-1	ENSMUST00000022623	9816	-1	ENSMUST00000024660	101931	-1	ENSMUST00000025983	2416	-1	ENSMUST00000027688	7339	-1	ENSMUST00000029297	14149	-1	ENSMUST00000030714	13788	-1	ENSMUST00000032191	59875	-1	ENSMUST00000034026	19279	-1
ENSMUST00000114937	118763	1	ENSMUST00000019791	76748	-1	ENSMUST00000021372	1709	-1	ENSMUST00000022665	10465	-1	ENSMUST00000024660	105315	-1	ENSMUST00000025983	2480	-1	ENSMUST00000027688	7400	-1	ENSMUST00000029297	14542	-1	ENSMUST00000030714	144840	-1	ENSMUST00000032191	60417	-1	ENSMUST00000034026	19617	-1
ENSMUST00000114937	118837	1	ENSMUST00000019791	78756	-1	ENSMUST00000021372	17178	-1	ENSMUST00000022665	10780	-1	ENSMUST00000024660	105727	-1	ENSMUST00000025983	2593	-1	ENSMUST00000027688	9485	-1	ENSMUST00000029297	15101	-1	ENSMUST00000030714	145353	-1	ENSMUST00000032191	60570	-1	ENSMUST00000034026	20483	-1
ENSMUST00000114937	119271	1	ENSMUST00000019791	78928	-1	ENSMUST00000021372	17571	-1	ENSMUST00000022665	10876	-1	ENSMUST00000024660	109673	-1	ENSMUST00000025983	2725	-1	ENSMUST00000027695	10412	-1	ENSMUST00000029297	15458	-1	ENSMUST00000030714	148271	-1	ENSMUST00000032191	60691	-1	ENSMUST00000034026	20530	-1
ENSMUST00000114937	119396	1	ENSMUST00000019791	80794	-1	ENSMUST00000021372	1786	-1	ENSMUST00000022665	10881	-1	ENSMUST00000024660	111452	-1	ENSMUST00000025983	2892	-1	ENSMUST00000027695	1043	-1	ENSMUST00000029297	16521	-1	ENSMUST00000030714	1488	-1	ENSMUST00000032191	62905	-1	ENSMUST00000034026	20713	-1
ENSMUST00000114937	118812	1	ENSMUST00000019791	81018	-1	ENSMUST00000021372	1795	-1	ENSMUST00000022665	11197	-1	ENSMUST00000024660	112213	-1	ENSMUST00000025983	297	-1	ENSMUST00000027695	10445	-1	ENSMUST00000029297	17572	-1	ENSMUST00000030714	156183	-1	ENSMUST00000032191	64235	-1	ENSMUST00000034026	20890	-1
ENSMUST00000100429	3093	1	ENSMUST00000019791	81349	-1	ENSMUST00000021372	18551	-1	ENSMUST00000022665	11370	-1	ENSMUST00000024660	112454	-1	ENSMUST00000025983	3063	-1	ENSMUST00000027695	10930	-1	ENSMUST00000029297	17683	-1	ENSMUST00000030714	168488	-1	ENSMUST00000032191	64247	-1	ENSMUST00000034026	20908	-1
ENSMUST00000100429	3115	1	ENSMUST00000019791	82416	-1	ENSMUST00000021372	19018	-1	ENSMUST00000022665	11879	-1	ENSMUST00000024660	112459	-1	ENSMUST00000025983	3417	-1	ENSMUST00000027695	10945	-1	ENSMUST00000029297	18078	-1	ENSMUST00000030714	168609	-1	ENSMUST00000032191	64345	-1	ENSMUST00000034026	21160	-1
ENSMUST00000100429	7261	1	ENSMUST00000019791	83673	-1	ENSMUST00000021372	19406	-1	ENSMUST00000022665	12382	-1	ENSMUST00000024660	113522	-1	ENSMUST00000025983	3675	-1	ENSMUST00000027695	11089	-1	ENSMUST00000029297	19371	-1	ENSMUST00000030714	169322	-1	ENSMUST00000032191	67397	-1	ENSMUST00000034026	21325	-1
ENSMUST00000102976	1060	1	ENSMUST00000019791	84069	-1	ENSMUST00000021372	19465	-1	ENSMUST00000022665	12738	-1	ENSMUST00000024660	118097	-1	ENSMUST00000025983	4066	-1	ENSMUST00000027695	11401	-1	ENSMUST00000029297	19382	-1	ENSMUST00000030714	170319	-1	ENSMUST00000032191	67798	-1	ENSMUST00000034026	2146	-1
ENSMUST00000114909	476	1	ENSMUST00000019791	84085	-1	ENSMUST00000021372	19623	-1	ENSMUST00000022665	12928	-1	ENSMUST00000024660	11935	-1	ENSMUST00000025983	4523	-1	ENSMUST00000027695	11451	-1	ENSMUST00000029297	19478	-1	ENSMUST00000030714	177168	-1	ENSMUST00000032191	6957	-1	ENSMUST00000034026	21472	-1
ENSMUST00000114909	1553	1	ENSMUST00000019791	86144	-1	ENSMUST00000021372	2064	-1	ENSMUST00000022665	13017	-1	ENSMUST00000024660	12095	-1	ENSMUST00000025983	5161	-1	ENSMUST00000027695	11475	-1	ENSMUST00000029297	22229	-1	ENSMUST00000030714	182831	-1	ENSMUST00000032191	70201	-1	ENSMUST00000034026	21612	-1
ENSMUST00000042512	11829	1	ENSMUST00000019791	8715	-1	ENSMUST00000021372	2504	-1	ENSMUST00000022665	13402	-1	ENSMUST00000024660	121560	-1	ENSMUST00000025983	5166	-1	ENSMUST00000027695	11863	-1	ENSMUST00000029297	22655	-1	ENSMUST00000030714	186471	-1	ENSMUST00000032191	72537	-1	ENSMUST00000034026	2177	-1
ENSMUST00000042512	11834	1	ENSMUST00000019791	87563	-1	ENSMUST00000021372	3150	-1	ENSMUST00000022665	13668	-1	ENSMUST00000024660	12762	-1	ENSMUST00000025983	5442	-1	ENSMUST00000027695	11981	-1	ENSMUST00000029297	24869	-1	ENSMUST00000030714	187550	-1	ENSMUST00000032191	74495	-1	ENSMUST00000034026	2197	-1
ENSMUST00000042512	10684	1	ENSMUST00000019791	89325	-1	ENSMUST00000021372	3562	-1	ENSMUST00000022665	13780	-1	ENSMUST00000024660	19162	-1	ENSMUST00000025983	6052	-1	ENSMUST00000027695	12026	-1	ENSMUST00000029297	26680	-1	ENSMUST00000030714	192390	-1	ENSMUST00000032191	76371	-1	ENSMUST00000034026	22445	-1
ENSMUST00000026886	87237	1	ENSMUST00000019791	89674	-1	ENSMUST00000021372	3616	-1	ENSMUST00000022665	13955	-1	ENSMUST00000024660	2086	-1	ENSMUST00000025983	6185	-1	ENSMUST00000027695	12178	-1	ENSMUST00000029297	28261	-1	ENSMUST00000030714	193534	-1	ENSMUST00000032191	77037	-1	ENSMUST00000034026	22936	-1
ENSMUST00000026886	97844	1	ENSMUST00000019791	94566	-1	ENSMUST00000021372	4093	-1	ENSMUST00000022665	1398	-1	ENSMUST00000024660	23616	-1	ENSMUST00000025983	6274	-1	ENSMUST00000027695	1452	-1	ENSMUST00000029297	2971	-1	ENSMUST00000030714	20333	-1	ENSMUST00000032191	77498	-1	ENSMUST00000034026	23115	-1
ENSMUST00000134794	76999	1	ENSMUST00000019791	94854	-1	ENSMUST00000021372	4231	-1	ENSMUST00000022665	14467	-1	ENSMUST00000024660	24530	-1	ENSMUST00000025983	6586	-1	ENSMUST00000027695	1666	-1	ENSMUST00000029297	31001	-1	ENSMUST00000030714	25263	-1	ENSMUST00000032191	78224	-1	ENSMUST00000034026	23123	-1
ENSMUST00000134794	77016	1	ENSMUST00000019791	94978	-1	ENSMUST00000021372	4378	-1	ENSMUST00000022665	14593	-1	ENSMUST00000024660	26913	-1	ENSMUST00000025983	6860	-1	ENSMUST00000027695	1715	-1	ENSMUST00000029297	31809	-1	ENSMUST00000030714	34865	-1	ENSMUST00000032191	78424	-1	ENSMUST00000034026	23328	-1
ENSMUST00000134794	77124	1	ENSMUST00000019791	95023	-1	ENSMUST00000021372	4761	-1	ENSMUST00000022665	1590	-1	ENSMUST00000024660	29935	-1	ENSMUST00000025983	7041	-1	ENSMUST00000027695	173	-1	ENSMUST00000029297	34284	-1	ENSMUST00000030714	37877	-1	ENSMUST00000032194	1139	-1	ENSMUST00000034026	23425	-1
ENSMUST00000061545	798	1	ENSMUST00000019791	96331	-1	ENSMUST00000021372	5087	-1	ENSMUST00000022665	16716	-1	ENSMUST00000024660	31432	-1	ENSMUST00000025983	7277	-1	ENSMUST00000027695	1789	-1	ENSMUST00000029297	36688	-1	ENSMUST00000030714	38245	-1	ENSMUST00000032194	1166	-1	ENSMUST00000034026	23732	-1
ENSMUST00000061545	852	1	ENSMUST00000019791	97787	-1	ENSMUST00000021372	5237	-1	ENSMUST00000022665	16934	-1	ENSMUST00000024660	31672	-1	ENSMUST00000025983	7443	-1	ENSMUST00000027695	2068	-1	ENSMUST00000029297	37754	-1	ENSMUST00000030714	38409	-1	ENSMUST00000032194	1172	-1	ENSMUST00000034026	24336	-1
ENSMUST00000061545	7888	1	ENSMUST00000019791	9983	-1	ENSMUST00000021372	5326	-1	ENSMUST00000022665	17072	-1	ENSMUST00000024660	31962	-1	ENSMUST00000025983	7493	-1	ENSMUST00000027695	300	-1	ENSMUST00000029297	39098	-1	ENSMUST00000030714	40766	-1	ENSMUST00000032194	1208	-1	ENSMUST00000034026	24452	-1
ENSMUST00000102960	72383	1	ENSMUST00000019808	1130	-1	ENSMUST00000021372	5336	-1	ENSMUST00000022665	1767	-1	ENSMUST00000024660	34603	-1	ENSMUST00000025983	7820	-1	ENSMUST00000027695	3055	-1	ENSMUST00000029297	41388	-1	ENSMUST00000030714	41074	-1	ENSMUST00000032194	1266	-1	ENSMUST00000034026	25419	-1
ENSMUST00000028045	101775	1	ENSMUST00000019808	1285	-1	ENSMUST00000021372	5561	-1	ENSMUST00000022665	17768	-1	ENSMUST00000024660	3603	-1	ENSMUST00000025983	7859	-1	ENSMUST00000027695	3701	-1	ENSMUST00000029297	42124	-1	ENSMUST00000030714	44866	-1	ENSMUST00000032194	1433	-1	ENSMUST00000034026	25425	-1
ENSMUST00000114723	381407	1	ENSMUST00000019808	141	-1	ENSMUST00000021372	5717	-1	ENSMUST00000022665	18567	-1	ENSMUST00000024660	39724	-1	ENSMUST00000025983	8179	-1	ENSMUST00000027695	3753	-1	ENSMUST00000029297	43262	-1	ENSMUST00000030714	46919	-1	ENSMUST00000032194	1463	-1	ENSMUST00000034026	2599	-1
ENSMUST00000114723	381421	1	ENSMUST00000019808	1738	-1	ENSMUST00000021372	5733	-1	ENSMUST00000022665	18859	-1	ENSMUST00000024660	40073	-1	ENSMUST00000025983	823	-1	ENSMUST00000027695	379	-1	ENSMUST00000029297	4362	-1	ENSMUST00000030714	47419	-1	ENSMUST00000032194	1558	-1	ENSMUST00000034026	26331	-1
ENSMUST00000114723	381448	1	ENSMUST00000019808	1745	-1	ENSMUST00000021372	5909	-1	ENSMUST00000022665	18933	-1	ENSMUST00000024660	47479	-1	ENSMUST00000025983	8253	-1	ENSMUST00000027695	3974	-1	ENSMUST00000029297	43986	-1	ENSMUST00000030714	54662	-1	ENSMUST00000032194	1755	-1	ENSMUST00000034026	3610	-1
ENSMUST00000114723	381591	1	ENSMUST00000019808	1749	-1	ENSMUST00000021372	607	-1	ENSMUST00000022665	1922	-1	ENSMUST00000024660	47875	-1	ENSMUST00000025983	8485	-1	ENSMUST00000027695	4035	-1	ENSMUST00000029297	43998	-1	ENSMUST00000030714	5702	-1	ENSMUST00000032194	1781	-1	ENSMUST00000034026	3725	-1
ENSMUST00000114723	381620	1	ENSMUST00000019808	1757	-1	ENSMUST00000021372	6654	-1	ENSMUST00000022665	19710	-1	ENSMUST00000024660	48281	-1	ENSMUST00000025983	8692	-1	ENSMUST00000027695	4594	-1	ENSMUST00000029297	44323	-1	ENSMUST00000030714	57421	-1	ENSMUST00000032194	1822	-1	ENSMUST00000034026	4443	-1
ENSMUST00000114723	381632	1	ENSMUST00000019808	1832	-1	ENSMUST00000021372	7136	-1	ENSMUST00000022665	20069	-1	ENSMUST00000024660	48730	-1	ENSMUST00000025983	9104	-1	ENSMUST00000027695	4601	-1	ENSMUST00000029297	44458	-1	ENSMUST00000030714	58321	-1	ENSMUST00000032194	183	-1	ENSMUST00000034026	4884	-1
ENSMUST00000114723	381695	1	ENSMUST00000019808	2000	-1	ENSMUST00000021372	7615	-1	ENSMUST00000022665	20118	-1	ENSMUST00000024660	50722	-1	ENSMUST00000025983	9268	-1	ENSMUST00000027695	5012	-1	ENSMUST00000029297	44564	-1	ENSMUST00000030714	61084	-1	ENSMUST00000032194	1841	-1	ENSMUST00000034026	6123	-1
ENSMUST00000114723	381963	1	ENSMUST00000019808	2042	-1	ENSMUST00000021372	785	-1	ENSMUST00000022665	20340	-1	ENSMUST00000024660	53666	-1	ENSMUST00000025983	9290	-1	ENSMUST00000027695	5084	-1	ENSMUST00000029297	44924	-1	ENSMUST00000030714	61282	-1	ENSMUST00000032194	1862	-1	ENSMUST00000034026	6298	-1
ENSMUST00000069870	21068	1	ENSMUST00000019808	209	-1	ENSMUST00000021372	790	-1	ENSMUST00000022665	2549	-1	ENSMUST00000024660	55752	-1	ENSMUST00000025983	9580	-1	ENSMUST00000027695	5547	-1	ENSMUST00000029297	45311	-1	ENSMUST00000030714	62641	-1	ENSMUST00000032194	1866	-1	ENSMUST00000034026	6696	-1
ENSMUST00000069870	21228	1	ENSMUST00000019808	2211	-1	ENSMUST00000021372	8007	-1	ENSMUST00000022665	2703	-1	ENSMUST00000024660	5851	-1	ENSMUST00000025983	9587	-1	ENSMUST00000027695	5651	-1	ENSMUST00000029297	46001	-1	ENSMUST00000030714	63382	-1	ENSMUST00000032194	1893	-1	ENSMUST00000034026	6712	-1
ENSMUST00000028081	395056	1	ENSMUST00000019808	2376	-1	ENSMUST00000021372	8014	-1	ENSMUST00000022665	2771	-1	ENSMUST00000024660	58661	-1	ENSMUST00000026008	10063	-1	ENSMUST00000027695	5719	-1	ENSMUST00000029297	49052	-1	ENSMUST00000030714	65334	-1	ENSMUST00000032194	1956	-1	ENSMUST00000034026	7777	-1
ENSMUST00000091420	1790	1	ENSMUST00000019808	238	-1	ENSMUST00000021372	8257	-1	ENSMUST00000022665	2820	-1	ENSMUST00000024660	61690	-1	ENSMUST00000026008	10067	-1	ENSMUST00000027695	6049	-1	ENSMUST00000029297	50839	-1	ENSMUST00000030714	67997	-1	ENSMUST00000032194	2378	-1	ENSMUST00000034026	7904	-1
ENSMUST00000091420	1908	1	ENSMUST00000019808	2576	-1	ENSMUST00000021372	8603	-1	ENSMUST00000022665	2825	-1	ENSMUST00000024660	62642	-1	ENSMUST00000026008	10157	-1	ENSMUST00000027695	6092	-1	ENSMUST00000029297	5086	-1	ENSMUST00000030714	68222	-1	ENSMUST00000032194	2383	-1	ENSMUST00000034026	8008	-1
ENSMUST00000091420	2091	1	ENSMUST00000019808	2583	-1	ENSMUST00000021372	9588	-1	ENSMUST00000022665	2887	-1	ENSMUST00000024660	64420	-1	ENSMUST00000026008	10375	-1	ENSMUST00000027695	6613	-1	ENSMUST00000029297	51444	-1	ENSMUST00000030714	75574	-1	ENSMUST00000032194	2699	-1	ENSMUST00000034026	8497	-1
ENSMUST00000091420	2158	1	ENSMUST00000019808	2589	-1	ENSMUST00000021377	10162	-1	ENSMUST00000022665	3469	-1	ENSMUST00000024660	65540	-1	ENSMUST00000026008	10664	-1	ENSMUST00000027695	6690	-1	ENSMUST00000029297	52004	-1	ENSMUST00000030714	77297	-1	ENSMUST00000032194	2809	-1	ENSMUST00000034030	10424	-1
ENSMUST00000091420	2571	1	ENSMUST00000019808	268	-1	ENSMUST00000021377	10491	-1	ENSMUST00000022665	3662	-1	ENSMUST00000024660	65705	-1	ENSMUST00000026008	10903	-1	ENSMUST00000027695	6859	-1	ENSMUST00000029297	54042	-1	ENSMUST00000030714	81407	-1	ENSMUST00000032194	3190	-1	ENSMUST00000034030	10813	-1
ENSMUST00000114671	97748	1	ENSMUST00000019808	2705	-1	ENSMUST00000021377	10786	-1	ENSMUST00000022665	4222	-1	ENSMUST00000024660	66352	-1	ENSMUST00000026008	10989	-1	ENSMUST00000027695	6965	-1	ENSMUST00000029297	55761	-1	ENSMUST00000030714	8178	-1	ENSMUST00000032194	3279	-1	ENSMUST00000034030	1098	-1
ENSMUST00000114671	97766	1	ENSMUST00000019808	2763	-1	ENSMUST00000021377	10923	-1	ENSMUST00000022665	4761	-1	ENSMUST00000024660	67728	-1	ENSMUST00000026008	11531	-1	ENSMUST00000027695	7491	-1	ENSMUST00000029297	57231	-1	ENSMUST00000030714	91070	-1	ENSMUST00000032194	3380	-1	ENSMUST00000034030	11409	-1
ENSMUST00000114671	97784	1	ENSMUST00000019808	2965	-1	ENSMUST00000021377	1294	-1	ENSMUST00000022665	5083	-1	ENSMUST00000024660	72600	-1	ENSMUST00000026008	11778	-1	ENSMUST00000027695	7513	-1	ENSMUST00000029297	57561	-1	ENSMUST00000030714	92324	-1	ENSMUST00000032194	3457	-1	ENSMUST00000034030	11700	-1
ENSMUST00000166495	3483	1	ENSMUST00000019808	3106	-1	ENSMUST00000021377	14859	-1	ENSMUST00000022665	5321	-1	ENSMUST00000024660	72797	-1	ENSMUST00000026008	11809	-1	ENSMUST00000027695	7577	-1	ENSMUST00000029297	59865	-1	ENSMUST00000030714	93533	-1	ENSMUST00000032194	3482	-1	ENSMUST00000034030	11713	-1
ENSMUST00000166495	3493	1	ENSMUST00000019808	3353	-1	ENSMUST00000021377	16068	-1	ENSMUST00000022665	5405	-1	ENSMUST00000024660	73000	-1	ENSMUST00000026008	11987	-1	ENSMUST00000027695	76	-1	ENSMUST00000029297	60303	-1	ENSMUST00000030714	93953	-1	ENSMUST00000032194	3564	-1	ENSMUST00000034030	11861	-1
ENSMUST00000166495	5844	1	ENSMUST00000019808	3363	-1	ENSMUST00000021377	16101	-1	ENSMUST00000022665	5667	-1	ENSMUST00000024660	73019	-1	ENSMUST00000026008	12000	-1	ENSMUST00000027695	7857	-1	ENSMUST00000029297	60543	-1	ENSMUST00000030714	99119	-1	ENSMUST00000032194	3962	-1	ENSMUST00000034030	11881	-1
ENSMUST00000166495	5847	1	ENSMUST00000019808	3620	-1	ENSMUST00000021377	16530	-1	ENSMUST00000022665	6072	-1	ENSMUST00000024660	7482	-1	ENSMUST00000026008	12217	-1	ENSMUST00000027695	8492	-1	ENSMUST00000029297	60683	-1	ENSMUST00000030714	99449	-1	ENSMUST00000032194	404	-1	ENSMUST00000034030	11947	-1
ENSMUST00000166495	5857	1	ENSMUST00000019808	40	-1	ENSMUST00000021377	16756	-1	ENSMUST00000022665	6658	-1	ENSMUST00000024660	75002	-1	ENSMUST00000026008	12279	-1	ENSMUST00000027695	8502	-1	ENSMUST00000029297	61399	-1	ENSMUST00000030714	99518	-1	ENSMUST00000032194	4046	-1	ENSMUST00000034030	12031	-1
ENSMUST00000166495	5890	1	ENSMUST00000019808	4590	-1	ENSMUST00000021377	17092	-1	ENSMUST00000022665	671	-1	ENSMUST00000024660	76005	-1	ENSMUST00000026008	12339	-1	ENSMUST00000027695	8570	-1	ENSMUST00000029297	6187	-1	ENSMUST00000030714	99851	-1	ENSMUST00000032194	4181	-1	ENSMUST00000034030	12925	-1
ENSMUST00000171845	778	1	ENSMUST00000019808	4668	-1	ENSMUST00000021377	18518	-1	ENSMUST00000022665	6713	-1	ENSMUST00000024660	77729	-1	ENSMUST00000026008	12377	-1	ENSMUST00000027695	8952	-1	ENSMUST00000029297	64813	-1	ENSMUST00000030723	10177	-1	ENSMUST00000032194	4187	-1	ENSMUST00000034030	13415	-1
ENSMUST00000028071	7213	1	ENSMUST00000019808	4852	-1	ENSMUST00000021377	1942	-1	ENSMUST00000022665	8068	-1	ENSMUST00000024660	80789	-1	ENSMUST00000026008	12932	-1	ENSMUST00000027695	9130	-1	ENSMUST00000029297	65606	-1	ENSMUST00000030723	10609	-1	ENSMUST00000032194	4685	-1	ENSMUST00000034030	1364	-1
ENSMUST00000028071	7577	1	ENSMUST00000019808	4916	-1	ENSMUST00000021377	19852	-1	ENSMUST00000022665	8091	-1	ENSMUST00000024660	82807	-1	ENSMUST00000026008	12976	-1	ENSMUST00000027695	9228	-1	ENSMUST00000029297	67811	-1	ENSMUST00000030723	1104	-1	ENSMUST00000032194	4803	-1	ENSMUST00000034030	13800	-1
ENSMUST00000006912	1995	1	ENSMUST00000019808	4958	-1	ENSMUST00000021377	20033	-1	ENSMUST00000022665	8148	-1	ENSMUST00000024660	83748	-1	ENSMUST00000026008	12982	-1	ENSMUST00000027695	9318	-1	ENSMUST00000029297	68777	-1	ENSMUST00000030723	11135	-1	ENSMUST00000032194	4914	-1	ENSMUST00000034030	13920	-1
ENSMUST00000006912	2151	1	ENSMUST00000019808	5092	-1	ENSMUST00000021377	20083	-1	ENSMUST00000022665	8709	-1	ENSMUST00000024660	86269	-1	ENSMUST00000026008	13212	-1	ENSMUST00000027695	9620	-1	ENSMUST00000029297	70025	-1	ENSMUST00000030723	12056	-1	ENSMUST00000032194	4943	-1	ENSMUST00000034030	13950	-1
ENSMUST00000023856	23125	1	ENSMUST00000019808	521	-1	ENSMUST00000021377	20652	-1	ENSMUST00000022665	8728	-1	ENSMUST00000024660	88568	-1	ENSMUST00000026008	13299	-1	ENSMUST00000027695	9637	-1	ENSMUST00000029297	70291	-1	ENSMUST00000030723	12754	-1	ENSMUST00000032194	4947	-1	ENSMUST00000034030	14086	-1
ENSMUST00000052168	914	1	ENSMUST00000019808	5568	-1	ENSMUST00000021377	20872	-1	ENSMUST00000022665	9087	-1	ENSMUST00000024660	91163	-1	ENSMUST00000026008	13534	-1	ENSMUST00000027697	10175	-1	ENSMUST00000029297	7045	-1	ENSMUST00000030723	14266	-1	ENSMUST00000032194	4955	-1	ENSMUST00000034030	14200	-1
ENSMUST00000052168	1244	1	ENSMUST00000019808	5605	-1	ENSMUST00000021377	21027	-1	ENSMUST00000022665	9539	-1	ENSMUST00000024660	9178	-1	ENSMUST00000026008	13931	-1	ENSMUST00000027697	10181	-1	ENSMUST00000029297	7113	-1	ENSMUST00000030723	15236	-1	ENSMUST00000032194	5073	-1	ENSMUST00000034030	14358	-1
ENSMUST00000052168	1256	1	ENSMUST00000019808	5822	-1	ENSMUST00000021377	21563	-1	ENSMUST00000022665	986	-1	ENSMUST00000024660	91987	-1	ENSMUST00000026008	14011	-1	ENSMUST00000027697	10334	-1	ENSMUST00000029297	72481	-1	ENSMUST00000030723	15269	-1	ENSMUST00000032194	5185	-1	ENSMUST00000034030	1499	-1
ENSMUST00000052168	1377	1	ENSMUST00000019808	5830	-1	ENSMUST00000021377	21850	-1	ENSMUST00000022665	9889	-1	ENSMUST00000024660	93080	-1	ENSMUST00000026008	14091	-1	ENSMUST00000027697	10451	-1	ENSMUST00000029297	74690	-1	ENSMUST00000030723	15548	-1	ENSMUST00000032194	5200	-1	ENSMUST00000034030	154	-1
ENSMUST00000052168	1423	1	ENSMUST00000019808	5871	-1	ENSMUST00000021377	22223	-1	ENSMUST00000022665	9998	-1	ENSMUST00000024660	96683	-1	ENSMUST00000026008	14549	-1	ENSMUST00000027697	10564	-1	ENSMUST00000029297	76498	-1	ENSMUST00000030723	16410	-1	ENSMUST00000032194	5424	-1	ENSMUST00000034030	1615	-1
ENSMUST00000114594	794	1	ENSMUST00000019808	658	-1	ENSMUST00000021377	23874	-1	ENSMUST00000022666	101451	-1	ENSMUST00000024660	97779	-1	ENSMUST00000026008	1461	-1	ENSMUST00000027697	10942	-1	ENSMUST00000029297	76655	-1	ENSMUST00000030723	18986	-1	ENSMUST00000032194	5429	-1	ENSMUST00000034030	281	-1
ENSMUST00000114594	1154	1	ENSMUST00000019808	724	-1	ENSMUST00000021377	24132	-1	ENSMUST00000022666	103928	-1	ENSMUST00000024660	98496	-1	ENSMUST00000026008	1487	-1	ENSMUST00000027697	11557	-1	ENSMUST00000029297	77405	-1	ENSMUST00000030723	20325	-1	ENSMUST00000032194	5492	-1	ENSMUST00000034030	2838	-1
ENSMUST00000114594	1361	1	ENSMUST00000019808	734	-1	ENSMUST00000021377	24184	-1	ENSMUST00000022666	12717	-1	ENSMUST00000024660	9858	-1	ENSMUST00000026008	1813	-1	ENSMUST00000027697	12137	-1	ENSMUST00000029297	77420	-1	ENSMUST00000030723	20603	-1	ENSMUST00000032194	5772	-1	ENSMUST00000034030	3411	-1
ENSMUST00000114594	1384	1	ENSMUST00000019808	974	-1	ENSMUST00000021377	25251	-1	ENSMUST00000022666	12958	-1	ENSMUST00000024702	1013	-1	ENSMUST00000026008	1890	-1	ENSMUST00000027697	12987	-1	ENSMUST00000029297	77844	-1	ENSMUST00000030723	21005	-1	ENSMUST00000032194	595	-1	ENSMUST00000034030	3496	-1
ENSMUST00000114594	2337	1	ENSMUST00000019907	1535	-1	ENSMUST00000021377	25941	-1	ENSMUST00000022666	132113	-1	ENSMUST00000024702	1056	-1	ENSMUST00000026008	2219	-1	ENSMUST00000027697	135	-1	ENSMUST00000029297	8591	-1	ENSMUST00000030723	21177	-1	ENSMUST00000032194	6047	-1	ENSMUST00000034030	3736	-1
ENSMUST00000114594	32315	1	ENSMUST00000019907	1652	-1	ENSMUST00000021377	26737	-1	ENSMUST00000022666	134792	-1	ENSMUST00000024702	1284	-1	ENSMUST00000026008	2424	-1	ENSMUST00000027697	15092	-1	ENSMUST00000029303	11897	-1	ENSMUST00000030723	22066	-1	ENSMUST00000032194	6175	-1	ENSMUST00000034030	3869	-1
ENSMUST00000114594	32889	1	ENSMUST00000019907	1673	-1	ENSMUST00000021377	27687	-1	ENSMUST00000022666	138183	-1	ENSMUST00000024702	1304	-1	ENSMUST00000026008	279	-1	ENSMUST00000027697	1543	-1	ENSMUST00000029303	12166	-1	ENSMUST00000030723	22505	-1	ENSMUST00000032194	6215	-1	ENSMUST00000034030	4130	-1
ENSMUST00000114594	32899	1	ENSMUST00000019907	1685	-1	ENSMUST00000021377	28104	-1	ENSMUST00000022666	138554	-1	ENSMUST00000024702	1341	-1	ENSMUST00000026008	302	-1	ENSMUST00000027697	15457	-1	ENSMUST00000029303	12971	-1	ENSMUST00000030723	2318	-1	ENSMUST00000032194	730	-1	ENSMUST00000034030	4134	-1
ENSMUST00000114594	33229	1	ENSMUST00000019907	2058	-1	ENSMUST00000021377	28637	-1	ENSMUST00000022666	146192	-1	ENSMUST00000024702	1387	-1	ENSMUST00000026008	3277	-1	ENSMUST00000027697	15709	-1	ENSMUST00000029303	14238	-1	ENSMUST00000030723	23208	-1	ENSMUST00000032194	85	-1	ENSMUST00000034030	4403	-1
ENSMUST00000114594	33243	1	ENSMUST00000019907	2067	-1	ENSMUST00000021377	29745	-1	ENSMUST00000022666	159955	-1	ENSMUST00000024702	1395	-1	ENSMUST00000026008	3354	-1	ENSMUST00000027697	15790	-1	ENSMUST00000029303	14878	-1	ENSMUST00000030723	23537	-1	ENSMUST00000032194	969	-1	ENSMUST00000034030	53	-1
ENSMUST00000114594	33291	1	ENSMUST00000019907	2136	-1	ENSMUST00000021377	30015	-1	ENSMUST00000022666	161467	-1	ENSMUST00000024702	1404	-1	ENSMUST00000026008	3538	-1	ENSMUST00000027697	15800	-1	ENSMUST00000029303	15157	-1	ENSMUST00000030723	24848	-1	ENSMUST00000032200	10224	-1	ENSMUST00000034030	5345	-1
ENSMUST00000114594	119474	1	ENSMUST00000019907	2186	-1	ENSMUST00000021377	30092	-1	ENSMUST00000022666	168495	-1	ENSMUST00000024702	1514	-1	ENSMUST00000026008	4970	-1	ENSMUST00000027697	16947	-1	ENSMUST00000029303	15506	-1	ENSMUST00000030723	25095	-1	ENSMUST00000032200	10410	-1	ENSMUST00000034030	5389	-1
ENSMUST00000114594	119685	1	ENSMUST00000019907	2676	-1	ENSMUST00000021377	31417	-1	ENSMUST00000022666	168531	-1	ENSMUST00000024702	1592	-1	ENSMUST00000026008	506	-1	ENSMUST00000027697	17081	-1	ENSMUST00000029303	16142	-1	ENSMUST00000030723	25970	-1	ENSMUST00000032200	10534	-1	ENSMUST00000034030	5951	-1
ENSMUST00000114594	805	1	ENSMUST00000019907	286	-1	ENSMUST00000021377	31641	-1	ENSMUST00000022666	16908	-1	ENSMUST00000024702	1596	-1	ENSMUST00000026008	5370	-1	ENSMUST00000027697	17238	-1	ENSMUST00000029303	18667	-1	ENSMUST00000030723	26267	-1	ENSMUST00000032200	10848	-1	ENSMUST00000034030	6104	-1
ENSMUST00000114594	1178	1	ENSMUST00000019907	2983	-1	ENSMUST00000021377	32187	-1	ENSMUST00000022666	170476	-1	ENSMUST00000024702	1630	-1	ENSMUST00000026008	5434	-1	ENSMUST00000027697	17812	-1	ENSMUST00000029303	18735	-1	ENSMUST00000030723	28158	-1	ENSMUST00000032200	10889	-1	ENSMUST00000034030	651	-1
ENSMUST00000114594	1191	1	ENSMUST00000019907	3017	-1	ENSMUST00000021377	33548	-1	ENSMUST00000022666	183140	-1	ENSMUST00000024702	1678	-1	ENSMUST00000026008	5932	-1	ENSMUST00000027697	18798	-1	ENSMUST00000029303	20211	-1	ENSMUST00000030723	28286	-1	ENSMUST00000032200	10945	-1	ENSMUST00000034030	667	-1
ENSMUST00000114594	32361	1	ENSMUST00000019907	3162	-1	ENSMUST00000021377	34339	-1	ENSMUST00000022666	186942	-1	ENSMUST00000024702	1728	-1	ENSMUST00000026008	5946	-1	ENSMUST00000027697	18858	-1	ENSMUST00000029303	20217	-1	ENSMUST00000030723	28554	-1	ENSMUST00000032200	11140	-1	ENSMUST00000034030	7033	-1
ENSMUST00000027992	24635	1	ENSMUST00000019907	3202	-1	ENSMUST00000021377	35282	-1	ENSMUST00000022666	18931	-1	ENSMUST00000024702	174	-1	ENSMUST00000026008	6312	-1	ENSMUST00000027697	19138	-1	ENSMUST00000029303	21267	-1	ENSMUST00000030723	29200	-1	ENSMUST00000032200	12407	-1	ENSMUST00000034030	7237	-1
ENSMUST00000054591	6283	1	ENSMUST00000019907	3216	-1	ENSMUST00000021377	3597	-1	ENSMUST00000022666	196001	-1	ENSMUST00000024702	1793	-1	ENSMUST00000026008	6608	-1	ENSMUST00000027697	19338	-1	ENSMUST00000029303	22236	-1	ENSMUST00000030723	29206	-1	ENSMUST00000032200	12619	-1	ENSMUST00000034030	7250	-1
ENSMUST00000054591	6401	1	ENSMUST00000019907	3228	-1	ENSMUST00000021377	36165	-1	ENSMUST00000022666	196373	-1	ENSMUST00000024702	186	-1	ENSMUST00000026008	6729	-1	ENSMUST00000027697	19420	-1	ENSMUST00000029303	22856	-1	ENSMUST00000030723	29345	-1	ENSMUST00000032200	1319	-1	ENSMUST00000034030	7620	-1
ENSMUST00000054591	6624	1	ENSMUST00000019907	3300	-1	ENSMUST00000021377	36201	-1	ENSMUST00000022666	197052	-1	ENSMUST00000024702	1952	-1	ENSMUST00000026008	7034	-1	ENSMUST00000027697	19705	-1	ENSMUST00000029303	23488	-1	ENSMUST00000030723	30225	-1	ENSMUST00000032200	13298	-1	ENSMUST00000034030	7773	-1
ENSMUST00000054591	6855	1	ENSMUST00000019907	3346	-1	ENSMUST00000021377	36828	-1	ENSMUST00000022666	201497	-1	ENSMUST00000024702	2268	-1	ENSMUST00000026008	7567	-1	ENSMUST00000027697	20356	-1	ENSMUST00000029303	23532	-1	ENSMUST00000030723	30415	-1	ENSMUST00000032200	1343	-1	ENSMUST00000034030	7806	-1
ENSMUST00000054591	7338	1	ENSMUST00000019907	3387	-1	ENSMUST00000021377	38528	-1	ENSMUST00000022666	202530	-1	ENSMUST00000024702	2274	-1	ENSMUST00000026008	7637	-1	ENSMUST00000027697	20518	-1	ENSMUST00000029303	23761	-1	ENSMUST00000030723	31401	-1	ENSMUST00000032200	13490	-1	ENSMUST00000034030	8173	-1
ENSMUST00000054591	7354	1	ENSMUST00000019907	3482	-1	ENSMUST00000021377	38651	-1	ENSMUST00000022666	209910	-1	ENSMUST00000024702	2725	-1	ENSMUST00000026008	7703	-1	ENSMUST00000027697	20718	-1	ENSMUST00000029303	2409	-1	ENSMUST00000030723	31867	-1	ENSMUST00000032200	13524	-1	ENSMUST00000034030	8378	-1
ENSMUST00000054591	7435	1	ENSMUST00000019907	3549	-1	ENSMUST00000021377	39959	-1	ENSMUST00000022666	212905	-1	ENSMUST00000024702	2809	-1	ENSMUST00000026008	7974	-1	ENSMUST00000027697	2091	-1	ENSMUST00000029303	2503	-1	ENSMUST00000030723	3312	-1	ENSMUST00000032200	13922	-1	ENSMUST00000034030	849	-1
ENSMUST00000054591	7455	1	ENSMUST00000019907	3597	-1	ENSMUST00000021377	40302	-1	ENSMUST00000022666	218177	-1	ENSMUST00000024702	2865	-1	ENSMUST00000026008	8025	-1	ENSMUST00000027697	21501	-1	ENSMUST00000029303	25087	-1	ENSMUST00000030723	33468	-1	ENSMUST00000032200	14919	-1	ENSMUST00000034030	8829	-1
ENSMUST00000054591	7461	1	ENSMUST00000019907	3648	-1	ENSMUST00000021377	41301	-1	ENSMUST00000022666	232758	-1	ENSMUST00000024702	2945	-1	ENSMUST00000026008	8357	-1	ENSMUST00000027697	21609	-1	ENSMUST00000029303	25293	-1	ENSMUST00000030723	33524	-1	ENSMUST00000032200	14971	-1	ENSMUST00000034030	8963	-1
ENSMUST00000054591	7465	1	ENSMUST00000019907	3770	-1	ENSMUST00000021377	43041	-1	ENSMUST00000022666	23654	-1	ENSMUST00000024702	3043	-1	ENSMUST00000026008	8575	-1	ENSMUST00000027697	21771	-1	ENSMUST00000029303	26	-1	ENSMUST00000030723	34363	-1	ENSMUST00000032200	1500	-1	ENSMUST00000034030	914	-1
ENSMUST00000054591	8064	1	ENSMUST00000019907	3791	-1	ENSMUST00000021377	4324	-1	ENSMUST00000022666	237252	-1	ENSMUST00000024702	3060	-1	ENSMUST00000026008	8916	-1	ENSMUST00000027697	21892	-1	ENSMUST00000029303	261	-1	ENSMUST00000030723	34604	-1	ENSMUST00000032200	15096	-1	ENSMUST00000034030	9508	-1
ENSMUST00000055946	459313	1	ENSMUST00000019907	3817	-1	ENSMUST00000021377	43645	-1	ENSMUST00000022666	241024	-1	ENSMUST00000024702	3133	-1	ENSMUST00000026008	933	-1	ENSMUST00000027697	22137	-1	ENSMUST00000029303	26724	-1	ENSMUST00000030723	36272	-1	ENSMUST00000032200	15426	-1	ENSMUST00000034030	9736	-1
ENSMUST00000055946	460163	1	ENSMUST00000019907	3839	-1	ENSMUST00000021377	5958	-1	ENSMUST00000022666	242861	-1	ENSMUST00000024702	3174	-1	ENSMUST00000026008	9548	-1	ENSMUST00000027697	22850	-1	ENSMUST00000029303	26867	-1	ENSMUST00000030723	38876	-1	ENSMUST00000032200	15542	-1	ENSMUST00000034030	9924	-1
ENSMUST00000055946	460387	1	ENSMUST00000019907	398	-1	ENSMUST00000021377	627	-1	ENSMUST00000022666	247283	-1	ENSMUST00000024702	3215	-1	ENSMUST00000026008	9656	-1	ENSMUST00000027697	23588	-1	ENSMUST00000029303	27014	-1	ENSMUST00000030723	39783	-1	ENSMUST00000032200	15953	-1	ENSMUST00000034030	9991	-1
ENSMUST00000055946	460416	1	ENSMUST00000019907	4507	-1	ENSMUST00000021377	7214	-1	ENSMUST00000022666	249841	-1	ENSMUST00000024702	3338	-1	ENSMUST00000026008	9684	-1	ENSMUST00000027697	24797	-1	ENSMUST00000029303	31380	-1	ENSMUST00000030723	40418	-1	ENSMUST00000032200	1661	-1	ENSMUST00000034048	10142	-1
ENSMUST00000055946	460490	1	ENSMUST00000019907	4601	-1	ENSMUST00000021377	8068	-1	ENSMUST00000022666	25026	-1	ENSMUST00000024702	3349	-1	ENSMUST00000026008	9717	-1	ENSMUST00000027697	24803	-1	ENSMUST00000029303	3674	-1	ENSMUST00000030723	41030	-1	ENSMUST00000032200	17628	-1	ENSMUST00000034048	11631	-1
ENSMUST00000055946	460529	1	ENSMUST00000019907	4743	-1	ENSMUST00000021377	8614	-1	ENSMUST00000022666	251087	-1	ENSMUST00000024702	3422	-1	ENSMUST00000026027	10188	-1	ENSMUST00000027697	25323	-1	ENSMUST00000029303	39006	-1	ENSMUST00000030723	41414	-1	ENSMUST00000032200	17971	-1	ENSMUST00000034048	12209	-1
ENSMUST00000055946	460549	1	ENSMUST00000019907	4838	-1	ENSMUST00000021377	8907	-1	ENSMUST00000022666	251484	-1	ENSMUST00000024702	3448	-1	ENSMUST00000026027	10486	-1	ENSMUST00000027697	2535	-1	ENSMUST00000029303	39725	-1	ENSMUST00000030723	4164	-1	ENSMUST00000032200	18065	-1	ENSMUST00000034048	12678	-1
ENSMUST00000028117	40882	1	ENSMUST00000019907	4900	-1	ENSMUST00000021381	1118	-1	ENSMUST00000022666	2620	-1	ENSMUST00000024702	3452	-1	ENSMUST00000026027	10531	-1	ENSMUST00000027697	25496	-1	ENSMUST00000029303	4113	-1	ENSMUST00000030723	42207	-1	ENSMUST00000032200	18353	-1	ENSMUST00000034048	13140	-1
ENSMUST00000102945	78490	1	ENSMUST00000019907	4955	-1	ENSMUST00000021381	1197	-1	ENSMUST00000022666	276474	-1	ENSMUST00000024702	3467	-1	ENSMUST00000026027	1059	-1	ENSMUST00000027697	3120	-1	ENSMUST00000029303	41174	-1	ENSMUST00000030723	42256	-1	ENSMUST00000032200	18429	-1	ENSMUST00000034048	13426	-1
ENSMUST00000102945	78607	1	ENSMUST00000019907	499	-1	ENSMUST00000021381	1394	-1	ENSMUST00000022666	299673	-1	ENSMUST00000024702	3530	-1	ENSMUST00000026027	10680	-1	ENSMUST00000027697	3132	-1	ENSMUST00000029303	41898	-1	ENSMUST00000030723	43112	-1	ENSMUST00000032200	18505	-1	ENSMUST00000034048	14255	-1
ENSMUST00000051416	886	1	ENSMUST00000019907	5229	-1	ENSMUST00000021381	1414	-1	ENSMUST00000022666	311084	-1	ENSMUST00000024702	3561	-1	ENSMUST00000026027	10698	-1	ENSMUST00000027697	4297	-1	ENSMUST00000029303	42083	-1	ENSMUST00000030723	43915	-1	ENSMUST00000032200	18791	-1	ENSMUST00000034048	1462	-1
ENSMUST00000051416	895	1	ENSMUST00000019907	5349	-1	ENSMUST00000021381	2148	-1	ENSMUST00000022666	314376	-1	ENSMUST00000024702	3585	-1	ENSMUST00000026027	10833	-1	ENSMUST00000027697	4611	-1	ENSMUST00000029303	42526	-1	ENSMUST00000030723	44340	-1	ENSMUST00000032200	18985	-1	ENSMUST00000034048	15018	-1
ENSMUST00000102939	783	1	ENSMUST00000019907	5615	-1	ENSMUST00000021381	2246	-1	ENSMUST00000022666	314721	-1	ENSMUST00000024702	384	-1	ENSMUST00000026027	10857	-1	ENSMUST00000027697	4699	-1	ENSMUST00000029303	43366	-1	ENSMUST00000030723	44357	-1	ENSMUST00000032200	2007	-1	ENSMUST00000034048	15091	-1
ENSMUST00000102939	2318	1	ENSMUST00000019907	5733	-1	ENSMUST00000021381	2295	-1	ENSMUST00000022666	330216	-1	ENSMUST00000024702	3877	-1	ENSMUST00000026027	10867	-1	ENSMUST00000027697	4879	-1	ENSMUST00000029303	44361	-1	ENSMUST00000030723	44370	-1	ENSMUST00000032200	2216	-1	ENSMUST00000034048	15564	-1
ENSMUST00000102939	2334	1	ENSMUST00000019907	5798	-1	ENSMUST00000021381	2384	-1	ENSMUST00000022666	340126	-1	ENSMUST00000024702	3979	-1	ENSMUST00000026027	10964	-1	ENSMUST00000027697	494	-1	ENSMUST00000029303	46607	-1	ENSMUST00000030723	45771	-1	ENSMUST00000032200	2294	-1	ENSMUST00000034048	15592	-1
ENSMUST00000102939	2506	1	ENSMUST00000019907	5939	-1	ENSMUST00000021381	2638	-1	ENSMUST00000022666	342292	-1	ENSMUST00000024702	4007	-1	ENSMUST00000026027	11748	-1	ENSMUST00000027697	5282	-1	ENSMUST00000029303	49777	-1	ENSMUST00000030723	5110	-1	ENSMUST00000032200	2402	-1	ENSMUST00000034048	16196	-1
ENSMUST00000102939	2740	1	ENSMUST00000019907	5995	-1	ENSMUST00000021381	2674	-1	ENSMUST00000022666	3469	-1	ENSMUST00000024702	4061	-1	ENSMUST00000026027	12027	-1	ENSMUST00000027697	5864	-1	ENSMUST00000029303	51513	-1	ENSMUST00000030723	6049	-1	ENSMUST00000032200	2545	-1	ENSMUST00000034048	16685	-1
ENSMUST00000102939	75255	1	ENSMUST00000019907	6014	-1	ENSMUST00000021381	2806	-1	ENSMUST00000022666	356977	-1	ENSMUST00000024702	4105	-1	ENSMUST00000026027	12196	-1	ENSMUST00000027697	604	-1	ENSMUST00000029303	54106	-1	ENSMUST00000030723	663	-1	ENSMUST00000032200	3012	-1	ENSMUST00000034048	18399	-1
ENSMUST00000102938	476	1	ENSMUST00000019907	6161	-1	ENSMUST00000021381	2980	-1	ENSMUST00000022666	358099	-1	ENSMUST00000024702	815	-1	ENSMUST00000026027	12752	-1	ENSMUST00000027697	6045	-1	ENSMUST00000029303	54169	-1	ENSMUST00000030723	7532	-1	ENSMUST00000032200	4525	-1	ENSMUST00000034048	1856	-1
ENSMUST00000102938	1115	1	ENSMUST00000019907	6172	-1	ENSMUST00000021381	3032	-1	ENSMUST00000022666	373254	-1	ENSMUST00000024702	947	-1	ENSMUST00000026027	12774	-1	ENSMUST00000027697	6273	-1	ENSMUST00000029303	54779	-1	ENSMUST00000030723	7706	-1	ENSMUST00000032200	4672	-1	ENSMUST00000034048	19068	-1
ENSMUST00000102938	93530	1	ENSMUST00000019907	6216	-1	ENSMUST00000021381	3478	-1	ENSMUST00000022666	381899	-1	ENSMUST00000024702	992	-1	ENSMUST00000026027	13398	-1	ENSMUST00000027697	6296	-1	ENSMUST00000029303	54829	-1	ENSMUST00000030723	7812	-1	ENSMUST00000032200	4756	-1	ENSMUST00000034048	1998	-1
ENSMUST00000102938	93605	1	ENSMUST00000019907	6261	-1	ENSMUST00000021381	3804	-1	ENSMUST00000022666	389830	-1	ENSMUST00000024705	10091	-1	ENSMUST00000026027	13648	-1	ENSMUST00000027697	6313	-1	ENSMUST00000029303	54985	-1	ENSMUST00000030723	7878	-1	ENSMUST00000032200	4810	-1	ENSMUST00000034048	20210	-1
ENSMUST00000102938	484	1	ENSMUST00000019907	666	-1	ENSMUST00000021381	3965	-1	ENSMUST00000022666	398464	-1	ENSMUST00000024705	10155	-1	ENSMUST00000026027	14180	-1	ENSMUST00000027697	6539	-1	ENSMUST00000029303	55064	-1	ENSMUST00000030723	7957	-1	ENSMUST00000032200	5705	-1	ENSMUST00000034048	20325	-1
ENSMUST00000102938	1137	1	ENSMUST00000019907	926	-1	ENSMUST00000021381	3971	-1	ENSMUST00000022666	404921	-1	ENSMUST00000024705	11934	-1	ENSMUST00000026027	14375	-1	ENSMUST00000027697	7177	-1	ENSMUST00000029303	55279	-1	ENSMUST00000030723	9106	-1	ENSMUST00000032200	5751	-1	ENSMUST00000034048	20338	-1
ENSMUST00000102938	1160	1	ENSMUST00000019908	10195	-1	ENSMUST00000021381	4167	-1	ENSMUST00000022666	413321	-1	ENSMUST00000024705	12571	-1	ENSMUST00000026027	14606	-1	ENSMUST00000027697	747	-1	ENSMUST00000029303	56957	-1	ENSMUST00000030723	9148	-1	ENSMUST00000032200	5816	-1	ENSMUST00000034048	20974	-1
ENSMUST00000028350	9937	1	ENSMUST00000019908	10344	-1	ENSMUST00000021381	4179	-1	ENSMUST00000022666	6496	-1	ENSMUST00000024705	13019	-1	ENSMUST00000026027	14946	-1	ENSMUST00000027697	8820	-1	ENSMUST00000029303	57680	-1	ENSMUST00000030724	10264	-1	ENSMUST00000032200	6202	-1	ENSMUST00000034048	21176	-1
ENSMUST00000028350	11348	1	ENSMUST00000019908	10581	-1	ENSMUST00000021381	4335	-1	ENSMUST00000022666	66756	-1	ENSMUST00000024705	13658	-1	ENSMUST00000026027	1521	-1	ENSMUST00000027697	9020	-1	ENSMUST00000029303	58993	-1	ENSMUST00000030724	11120	-1	ENSMUST00000032200	6282	-1	ENSMUST00000034048	21653	-1
ENSMUST00000028350	11818	1	ENSMUST00000019908	10620	-1	ENSMUST00000021381	4389	-1	ENSMUST00000022666	68285	-1	ENSMUST00000024705	14860	-1	ENSMUST00000026027	15387	-1	ENSMUST00000027697	9077	-1	ENSMUST00000029303	6221	-1	ENSMUST00000030724	1137	-1	ENSMUST00000032200	6689	-1	ENSMUST00000034048	22530	-1
ENSMUST00000028350	9919	1	ENSMUST00000019908	10935	-1	ENSMUST00000021381	4434	-1	ENSMUST00000022666	69191	-1	ENSMUST00000024705	15330	-1	ENSMUST00000026027	15486	-1	ENSMUST00000027697	9344	-1	ENSMUST00000029303	6589	-1	ENSMUST00000030724	11845	-1	ENSMUST00000032200	6697	-1	ENSMUST00000034048	22555	-1
ENSMUST00000045604	227	1	ENSMUST00000019908	1097	-1	ENSMUST00000021381	4542	-1	ENSMUST00000022666	73984	-1	ENSMUST00000024705	15486	-1	ENSMUST00000026027	1579	-1	ENSMUST00000027706	11181	-1	ENSMUST00000029303	7620	-1	ENSMUST00000030724	12611	-1	ENSMUST00000032200	6810	-1	ENSMUST00000034048	22637	-1
ENSMUST00000045604	241	1	ENSMUST00000019908	11005	-1	ENSMUST00000021381	4770	-1	ENSMUST00000022666	74265	-1	ENSMUST00000024705	15517	-1	ENSMUST00000026027	1732	-1	ENSMUST00000027706	12776	-1	ENSMUST00000029303	7845	-1	ENSMUST00000030724	1295	-1	ENSMUST00000032200	6884	-1	ENSMUST00000034048	23458	-1
ENSMUST00000045604	913	1	ENSMUST00000019908	11147	-1	ENSMUST00000021381	4810	-1	ENSMUST00000022666	77017	-1	ENSMUST00000024705	15689	-1	ENSMUST00000026027	1911	-1	ENSMUST00000027706	13882	-1	ENSMUST00000029303	9567	-1	ENSMUST00000030724	1365	-1	ENSMUST00000032200	6990	-1	ENSMUST00000034048	2482	-1
ENSMUST00000100334	7467	1	ENSMUST00000019908	11152	-1	ENSMUST00000021381	4905	-1	ENSMUST00000022666	79101	-1	ENSMUST00000024705	15724	-1	ENSMUST00000026027	2078	-1	ENSMUST00000027706	13968	-1	ENSMUST00000029303	9972	-1	ENSMUST00000030724	13737	-1	ENSMUST00000032200	7405	-1	ENSMUST00000034048	24873	-1
ENSMUST00000100334	7498	1	ENSMUST00000019908	11511	-1	ENSMUST00000021381	493	-1	ENSMUST00000022666	82436	-1	ENSMUST00000024705	16162	-1	ENSMUST00000026027	2144	-1	ENSMUST00000027706	14240	-1	ENSMUST00000029303	9982	-1	ENSMUST00000030724	13786	-1	ENSMUST00000032200	7492	-1	ENSMUST00000034048	2553	-1
ENSMUST00000100334	7544	1	ENSMUST00000019908	11522	-1	ENSMUST00000021381	4975	-1	ENSMUST00000022666	85756	-1	ENSMUST00000024705	16492	-1	ENSMUST00000026027	2281	-1	ENSMUST00000027706	1432	-1	ENSMUST00000029311	100193	-1	ENSMUST00000030724	14214	-1	ENSMUST00000032200	7564	-1	ENSMUST00000034048	25554	-1
ENSMUST00000104999	3	1	ENSMUST00000019908	11897	-1	ENSMUST00000021381	5118	-1	ENSMUST00000022690	10565	-1	ENSMUST00000024705	16736	-1	ENSMUST00000026027	2289	-1	ENSMUST00000027706	14620	-1	ENSMUST00000029311	102754	-1	ENSMUST00000030724	14269	-1	ENSMUST00000032200	7722	-1	ENSMUST00000034048	26510	-1
ENSMUST00000104999	460	1	ENSMUST00000019908	11983	-1	ENSMUST00000021381	5251	-1	ENSMUST00000022690	10687	-1	ENSMUST00000024705	16858	-1	ENSMUST00000026027	2469	-1	ENSMUST00000027706	14999	-1	ENSMUST00000029311	109944	-1	ENSMUST00000030724	14317	-1	ENSMUST00000032200	8366	-1	ENSMUST00000034048	26869	-1
ENSMUST00000104999	487	1	ENSMUST00000019908	1432	-1	ENSMUST00000021381	532	-1	ENSMUST00000022690	10773	-1	ENSMUST00000024705	16953	-1	ENSMUST00000026027	2703	-1	ENSMUST00000027706	16658	-1	ENSMUST00000029311	11063	-1	ENSMUST00000030724	14482	-1	ENSMUST00000032200	8494	-1	ENSMUST00000034048	2807	-1
ENSMUST00000114355	612	1	ENSMUST00000019908	1449	-1	ENSMUST00000021381	5349	-1	ENSMUST00000022690	10889	-1	ENSMUST00000024705	17009	-1	ENSMUST00000026027	2922	-1	ENSMUST00000027706	1777	-1	ENSMUST00000029311	111377	-1	ENSMUST00000030724	14596	-1	ENSMUST00000032200	893	-1	ENSMUST00000034048	28414	-1
ENSMUST00000114355	956	1	ENSMUST00000019908	1641	-1	ENSMUST00000021381	5380	-1	ENSMUST00000022690	10945	-1	ENSMUST00000024705	17250	-1	ENSMUST00000026027	3303	-1	ENSMUST00000027706	19627	-1	ENSMUST00000029311	114270	-1	ENSMUST00000030724	14767	-1	ENSMUST00000032200	9049	-1	ENSMUST00000034048	28833	-1
ENSMUST00000114355	1054	1	ENSMUST00000019908	17	-1	ENSMUST00000021381	5396	-1	ENSMUST00000022690	11068	-1	ENSMUST00000024705	17259	-1	ENSMUST00000026027	3611	-1	ENSMUST00000027706	19705	-1	ENSMUST00000029311	114600	-1	ENSMUST00000030724	14965	-1	ENSMUST00000032200	9320	-1	ENSMUST00000034048	29356	-1
ENSMUST00000100329	781	1	ENSMUST00000019908	1965	-1	ENSMUST00000021381	5449	-1	ENSMUST00000022690	11203	-1	ENSMUST00000024705	17332	-1	ENSMUST00000026027	3877	-1	ENSMUST00000027706	21637	-1	ENSMUST00000029311	115797	-1	ENSMUST00000030724	15212	-1	ENSMUST00000032200	9479	-1	ENSMUST00000034048	29661	-1
ENSMUST00000100329	888	1	ENSMUST00000019908	2044	-1	ENSMUST00000021381	5600	-1	ENSMUST00000022690	11387	-1	ENSMUST00000024705	17349	-1	ENSMUST00000026027	3931	-1	ENSMUST00000027706	21747	-1	ENSMUST00000029311	116049	-1	ENSMUST00000030724	15315	-1	ENSMUST00000032200	9628	-1	ENSMUST00000034048	30467	-1
ENSMUST00000100329	1593	1	ENSMUST00000019908	2174	-1	ENSMUST00000021381	6025	-1	ENSMUST00000022690	11651	-1	ENSMUST00000024705	17675	-1	ENSMUST00000026027	4052	-1	ENSMUST00000027706	21912	-1	ENSMUST00000029311	117613	-1	ENSMUST00000030724	15595	-1	ENSMUST00000032200	9661	-1	ENSMUST00000034048	3063	-1
ENSMUST00000104998	885	1	ENSMUST00000019908	2727	-1	ENSMUST00000021381	6138	-1	ENSMUST00000022690	11849	-1	ENSMUST00000024705	17996	-1	ENSMUST00000026027	4654	-1	ENSMUST00000027706	22107	-1	ENSMUST00000029311	119947	-1	ENSMUST00000030724	15760	-1	ENSMUST00000032214	1026	-1	ENSMUST00000034048	31093	-1
ENSMUST00000051033	1560	1	ENSMUST00000019908	2739	-1	ENSMUST00000021381	621	-1	ENSMUST00000022690	11976	-1	ENSMUST00000024705	18755	-1	ENSMUST00000026027	4862	-1	ENSMUST00000027706	22549	-1	ENSMUST00000029311	121173	-1	ENSMUST00000030724	15941	-1	ENSMUST00000032214	1154	-1	ENSMUST00000034048	31839	-1
ENSMUST00000051033	1774	1	ENSMUST00000019908	2846	-1	ENSMUST00000021381	626	-1	ENSMUST00000022690	12115	-1	ENSMUST00000024705	19531	-1	ENSMUST00000026027	4893	-1	ENSMUST00000027706	22742	-1	ENSMUST00000029311	121587	-1	ENSMUST00000030724	1643	-1	ENSMUST00000032214	1163	-1	ENSMUST00000034048	3677	-1
ENSMUST00000028341	822	1	ENSMUST00000019908	2941	-1	ENSMUST00000021381	632	-1	ENSMUST00000022690	1232	-1	ENSMUST00000024705	20347	-1	ENSMUST00000026027	5457	-1	ENSMUST00000027706	23344	-1	ENSMUST00000029311	122030	-1	ENSMUST00000030724	16481	-1	ENSMUST00000032214	1173	-1	ENSMUST00000034048	3909	-1
ENSMUST00000028341	726	1	ENSMUST00000019908	2987	-1	ENSMUST00000021381	6353	-1	ENSMUST00000022690	12401	-1	ENSMUST00000024705	20453	-1	ENSMUST00000026027	5570	-1	ENSMUST00000027706	23392	-1	ENSMUST00000029311	122916	-1	ENSMUST00000030724	16516	-1	ENSMUST00000032214	1236	-1	ENSMUST00000034048	4004	-1
ENSMUST00000114310	721	1	ENSMUST00000019908	3033	-1	ENSMUST00000021381	6402	-1	ENSMUST00000022690	12474	-1	ENSMUST00000024705	20907	-1	ENSMUST00000026027	5791	-1	ENSMUST00000027706	25059	-1	ENSMUST00000029311	126196	-1	ENSMUST00000030724	1662	-1	ENSMUST00000032214	1290	-1	ENSMUST00000034048	430	-1
ENSMUST00000028329	4180	1	ENSMUST00000019908	3295	-1	ENSMUST00000021381	6428	-1	ENSMUST00000022690	12612	-1	ENSMUST00000024705	21154	-1	ENSMUST00000026027	6204	-1	ENSMUST00000027706	26179	-1	ENSMUST00000029311	128111	-1	ENSMUST00000030724	16851	-1	ENSMUST00000032214	1329	-1	ENSMUST00000034048	436	-1
ENSMUST00000028329	4293	1	ENSMUST00000019908	3405	-1	ENSMUST00000021381	6506	-1	ENSMUST00000022690	12796	-1	ENSMUST00000024705	21348	-1	ENSMUST00000026027	6238	-1	ENSMUST00000027706	27260	-1	ENSMUST00000029311	128916	-1	ENSMUST00000030724	16983	-1	ENSMUST00000032214	1368	-1	ENSMUST00000034048	4533	-1
ENSMUST00000100316	1919	1	ENSMUST00000019908	3566	-1	ENSMUST00000021381	6525	-1	ENSMUST00000022690	12850	-1	ENSMUST00000024705	21473	-1	ENSMUST00000026027	7101	-1	ENSMUST00000027706	28331	-1	ENSMUST00000029311	134656	-1	ENSMUST00000030724	17799	-1	ENSMUST00000032214	1815	-1	ENSMUST00000034048	4873	-1
ENSMUST00000100316	3615	1	ENSMUST00000019908	4050	-1	ENSMUST00000021381	6718	-1	ENSMUST00000022690	1294	-1	ENSMUST00000024705	22156	-1	ENSMUST00000026027	74	-1	ENSMUST00000027706	28634	-1	ENSMUST00000029311	143162	-1	ENSMUST00000030724	17813	-1	ENSMUST00000032214	1867	-1	ENSMUST00000034048	5116	-1
ENSMUST00000100316	3644	1	ENSMUST00000019908	451	-1	ENSMUST00000021381	6724	-1	ENSMUST00000022690	12967	-1	ENSMUST00000024705	22213	-1	ENSMUST00000026027	746	-1	ENSMUST00000027706	28644	-1	ENSMUST00000029311	145206	-1	ENSMUST00000030724	17874	-1	ENSMUST00000032214	196	-1	ENSMUST00000034048	6550	-1
ENSMUST00000039156	1652	1	ENSMUST00000019908	4970	-1	ENSMUST00000021381	6880	-1	ENSMUST00000022690	13420	-1	ENSMUST00000024705	22246	-1	ENSMUST00000026027	7574	-1	ENSMUST00000027706	28832	-1	ENSMUST00000029311	150566	-1	ENSMUST00000030724	17888	-1	ENSMUST00000032214	2030	-1	ENSMUST00000034048	6803	-1
ENSMUST00000039156	1766	1	ENSMUST00000019908	5239	-1	ENSMUST00000021384	102	-1	ENSMUST00000022690	13774	-1	ENSMUST00000024705	22478	-1	ENSMUST00000026027	8149	-1	ENSMUST00000027706	29466	-1	ENSMUST00000029311	155770	-1	ENSMUST00000030724	17925	-1	ENSMUST00000032214	2046	-1	ENSMUST00000034048	6943	-1
ENSMUST00000114217	40	1	ENSMUST00000019908	5445	-1	ENSMUST00000021384	10654	-1	ENSMUST00000022690	13819	-1	ENSMUST00000024705	22963	-1	ENSMUST00000026027	8279	-1	ENSMUST00000027706	30091	-1	ENSMUST00000029311	159611	-1	ENSMUST00000030724	18352	-1	ENSMUST00000032214	2079	-1	ENSMUST00000034048	7315	-1
ENSMUST00000114217	272	1	ENSMUST00000019908	6200	-1	ENSMUST00000021384	10787	-1	ENSMUST00000022690	14101	-1	ENSMUST00000024705	23288	-1	ENSMUST00000026027	8311	-1	ENSMUST00000027706	30423	-1	ENSMUST00000029311	161550	-1	ENSMUST00000030724	2823	-1	ENSMUST00000032214	2322	-1	ENSMUST00000034048	7485	-1
ENSMUST00000114217	381	1	ENSMUST00000019908	7017	-1	ENSMUST00000021384	11010	-1	ENSMUST00000022690	14245	-1	ENSMUST00000024705	2354	-1	ENSMUST00000026027	8453	-1	ENSMUST00000027706	31945	-1	ENSMUST00000029311	18220	-1	ENSMUST00000030724	3140	-1	ENSMUST00000032214	2361	-1	ENSMUST00000034048	8191	-1
ENSMUST00000114217	587	1	ENSMUST00000019908	7065	-1	ENSMUST00000021384	11185	-1	ENSMUST00000022690	14573	-1	ENSMUST00000024705	23854	-1	ENSMUST00000026027	8500	-1	ENSMUST00000027706	32088	-1	ENSMUST00000029311	1911	-1	ENSMUST00000030724	3303	-1	ENSMUST00000032214	2462	-1	ENSMUST00000034048	8876	-1
ENSMUST00000114217	1180	1	ENSMUST00000019908	7089	-1	ENSMUST00000021384	11509	-1	ENSMUST00000022690	1459	-1	ENSMUST00000024705	24126	-1	ENSMUST00000026027	8641	-1	ENSMUST00000027706	32261	-1	ENSMUST00000029311	21631	-1	ENSMUST00000030724	3515	-1	ENSMUST00000032214	2529	-1	ENSMUST00000034048	9765	-1
ENSMUST00000114217	1187	1	ENSMUST00000019908	7205	-1	ENSMUST00000021384	11544	-1	ENSMUST00000022690	15606	-1	ENSMUST00000024705	24168	-1	ENSMUST00000026027	9651	-1	ENSMUST00000027706	34062	-1	ENSMUST00000029311	22030	-1	ENSMUST00000030724	3613	-1	ENSMUST00000032214	2536	-1	ENSMUST00000034049	1186	-1
ENSMUST00000114217	1571	1	ENSMUST00000019908	7398	-1	ENSMUST00000021384	11927	-1	ENSMUST00000022690	1588	-1	ENSMUST00000024705	24619	-1	ENSMUST00000026027	9673	-1	ENSMUST00000027706	34658	-1	ENSMUST00000029311	22309	-1	ENSMUST00000030724	3781	-1	ENSMUST00000032214	255	-1	ENSMUST00000034049	1269	-1
ENSMUST00000114217	1863	1	ENSMUST00000019908	7468	-1	ENSMUST00000021384	12088	-1	ENSMUST00000022690	16007	-1	ENSMUST00000024705	2935	-1	ENSMUST00000026043	10131	-1	ENSMUST00000027706	34664	-1	ENSMUST00000029311	2324	-1	ENSMUST00000030724	3987	-1	ENSMUST00000032214	2583	-1	ENSMUST00000034049	1302	-1
ENSMUST00000114217	2501	1	ENSMUST00000019908	7475	-1	ENSMUST00000021384	12121	-1	ENSMUST00000022690	16524	-1	ENSMUST00000024705	3958	-1	ENSMUST00000026043	10176	-1	ENSMUST00000027706	36370	-1	ENSMUST00000029311	25054	-1	ENSMUST00000030724	4012	-1	ENSMUST00000032214	2626	-1	ENSMUST00000034049	1321	-1
ENSMUST00000114217	3350	1	ENSMUST00000019908	7487	-1	ENSMUST00000021384	12339	-1	ENSMUST00000022690	1706	-1	ENSMUST00000024705	4075	-1	ENSMUST00000026043	11427	-1	ENSMUST00000027706	37570	-1	ENSMUST00000029311	26786	-1	ENSMUST00000030724	4517	-1	ENSMUST00000032214	2700	-1	ENSMUST00000034049	1435	-1
ENSMUST00000114217	3740	1	ENSMUST00000019908	7570	-1	ENSMUST00000021384	12442	-1	ENSMUST00000022690	1838	-1	ENSMUST00000024705	4617	-1	ENSMUST00000026043	12872	-1	ENSMUST00000027706	37943	-1	ENSMUST00000029311	29901	-1	ENSMUST00000030724	4565	-1	ENSMUST00000032214	2744	-1	ENSMUST00000034049	1459	-1
ENSMUST00000114217	4479	1	ENSMUST00000019908	7794	-1	ENSMUST00000021384	12924	-1	ENSMUST00000022690	1948	-1	ENSMUST00000024705	4625	-1	ENSMUST00000026043	13133	-1	ENSMUST00000027706	383	-1	ENSMUST00000029311	31300	-1	ENSMUST00000030724	5433	-1	ENSMUST00000032214	2934	-1	ENSMUST00000034049	1511	-1
ENSMUST00000114217	4494	1	ENSMUST00000019908	8002	-1	ENSMUST00000021384	12954	-1	ENSMUST00000022690	2289	-1	ENSMUST00000024705	4675	-1	ENSMUST00000026043	14437	-1	ENSMUST00000027706	38609	-1	ENSMUST00000029311	33751	-1	ENSMUST00000030724	5565	-1	ENSMUST00000032214	3044	-1	ENSMUST00000034049	1655	-1
ENSMUST00000028307	351	1	ENSMUST00000019908	8318	-1	ENSMUST00000021384	13034	-1	ENSMUST00000022690	2424	-1	ENSMUST00000024705	4950	-1	ENSMUST00000026043	15090	-1	ENSMUST00000027706	39516	-1	ENSMUST00000029311	35436	-1	ENSMUST00000030724	5797	-1	ENSMUST00000032214	3111	-1	ENSMUST00000034049	1671	-1
ENSMUST00000028307	402	1	ENSMUST00000019908	8671	-1	ENSMUST00000021384	1449	-1	ENSMUST00000022690	2452	-1	ENSMUST00000024705	581	-1	ENSMUST00000026043	15701	-1	ENSMUST00000027706	40614	-1	ENSMUST00000029311	36403	-1	ENSMUST00000030724	6477	-1	ENSMUST00000032214	3208	-1	ENSMUST00000034049	1686	-1
ENSMUST00000061483	517	1	ENSMUST00000019908	8827	-1	ENSMUST00000021384	1640	-1	ENSMUST00000022690	2476	-1	ENSMUST00000024705	608	-1	ENSMUST00000026043	16629	-1	ENSMUST00000027706	40720	-1	ENSMUST00000029311	40204	-1	ENSMUST00000030724	679	-1	ENSMUST00000032214	3217	-1	ENSMUST00000034049	1772	-1
ENSMUST00000061483	541	1	ENSMUST00000019908	8834	-1	ENSMUST00000021384	3146	-1	ENSMUST00000022690	274	-1	ENSMUST00000024705	6175	-1	ENSMUST00000026043	17097	-1	ENSMUST00000027706	42063	-1	ENSMUST00000029311	41880	-1	ENSMUST00000030724	7504	-1	ENSMUST00000032214	3227	-1	ENSMUST00000034049	1794	-1
ENSMUST00000061483	584	1	ENSMUST00000019908	8931	-1	ENSMUST00000021384	337	-1	ENSMUST00000022690	3718	-1	ENSMUST00000024705	6742	-1	ENSMUST00000026043	17329	-1	ENSMUST00000027706	42280	-1	ENSMUST00000029311	41921	-1	ENSMUST00000030724	7510	-1	ENSMUST00000032214	3233	-1	ENSMUST00000034049	1943	-1
ENSMUST00000037580	38542	1	ENSMUST00000019908	8968	-1	ENSMUST00000021384	3415	-1	ENSMUST00000022690	3763	-1	ENSMUST00000024705	7151	-1	ENSMUST00000026043	17540	-1	ENSMUST00000027706	43068	-1	ENSMUST00000029311	43167	-1	ENSMUST00000030724	8162	-1	ENSMUST00000032214	3320	-1	ENSMUST00000034049	2069	-1
ENSMUST00000037580	39003	1	ENSMUST00000019908	9139	-1	ENSMUST00000021384	3532	-1	ENSMUST00000022690	3901	-1	ENSMUST00000024705	7758	-1	ENSMUST00000026043	236	-1	ENSMUST00000027706	43382	-1	ENSMUST00000029311	48284	-1	ENSMUST00000030724	8320	-1	ENSMUST00000032214	3411	-1	ENSMUST00000034049	24	-1
ENSMUST00000036509	310	1	ENSMUST00000019908	928	-1	ENSMUST00000021384	3725	-1	ENSMUST00000022690	4059	-1	ENSMUST00000024705	7865	-1	ENSMUST00000026043	25088	-1	ENSMUST00000027706	43854	-1	ENSMUST00000029311	48809	-1	ENSMUST00000030724	8401	-1	ENSMUST00000032214	4095	-1	ENSMUST00000034049	2535	-1
ENSMUST00000114159	4332	1	ENSMUST00000019908	9585	-1	ENSMUST00000021384	3738	-1	ENSMUST00000022690	5071	-1	ENSMUST00000024705	8219	-1	ENSMUST00000026043	25495	-1	ENSMUST00000027706	46188	-1	ENSMUST00000029311	50538	-1	ENSMUST00000030724	8505	-1	ENSMUST00000032214	4191	-1	ENSMUST00000034049	2809	-1
ENSMUST00000133808	1670	1	ENSMUST00000019908	9597	-1	ENSMUST00000021384	3833	-1	ENSMUST00000022690	5190	-1	ENSMUST00000024705	8692	-1	ENSMUST00000026043	26498	-1	ENSMUST00000027706	47132	-1	ENSMUST00000029311	51072	-1	ENSMUST00000030724	908	-1	ENSMUST00000032214	4430	-1	ENSMUST00000034049	2898	-1
ENSMUST00000091263	1521	1	ENSMUST00000019908	9838	-1	ENSMUST00000021384	3878	-1	ENSMUST00000022690	5894	-1	ENSMUST00000024705	886	-1	ENSMUST00000026043	30529	-1	ENSMUST00000027706	47318	-1	ENSMUST00000029311	5192	-1	ENSMUST00000030724	9495	-1	ENSMUST00000032214	4552	-1	ENSMUST00000034049	2937	-1
ENSMUST00000091263	2679	1	ENSMUST00000019908	9933	-1	ENSMUST00000021384	3891	-1	ENSMUST00000022690	6224	-1	ENSMUST00000024705	9274	-1	ENSMUST00000026043	31552	-1	ENSMUST00000027706	47638	-1	ENSMUST00000029311	52393	-1	ENSMUST00000030724	9571	-1	ENSMUST00000032214	4623	-1	ENSMUST00000034049	3012	-1
ENSMUST00000066889	27278	1	ENSMUST00000019924	1017	-1	ENSMUST00000021384	3966	-1	ENSMUST00000022690	6807	-1	ENSMUST00000024705	9797	-1	ENSMUST00000026043	3161	-1	ENSMUST00000027706	47968	-1	ENSMUST00000029311	52629	-1	ENSMUST00000030731	10084	-1	ENSMUST00000032214	4699	-1	ENSMUST00000034049	3181	-1
ENSMUST00000066889	27351	1	ENSMUST00000019924	10184	-1	ENSMUST00000021384	3987	-1	ENSMUST00000022690	7081	-1	ENSMUST00000024705	9890	-1	ENSMUST00000026043	32141	-1	ENSMUST00000027706	49466	-1	ENSMUST00000029311	57099	-1	ENSMUST00000030731	10392	-1	ENSMUST00000032214	525	-1	ENSMUST00000034049	3324	-1
ENSMUST00000066889	27640	1	ENSMUST00000019924	10301	-1	ENSMUST00000021384	407	-1	ENSMUST00000022690	7123	-1	ENSMUST00000024705	9911	-1	ENSMUST00000026043	32363	-1	ENSMUST00000027706	52879	-1	ENSMUST00000029311	6291	-1	ENSMUST00000030731	10427	-1	ENSMUST00000032214	854	-1	ENSMUST00000034049	3331	-1
ENSMUST00000057204	607	1	ENSMUST00000019924	10308	-1	ENSMUST00000021384	4286	-1	ENSMUST00000022690	7235	-1	ENSMUST00000024708	10139	-1	ENSMUST00000026043	32891	-1	ENSMUST00000027706	53507	-1	ENSMUST00000029311	63290	-1	ENSMUST00000030731	11119	-1	ENSMUST00000032214	881	-1	ENSMUST00000034049	3487	-1
ENSMUST00000057204	2565	1	ENSMUST00000019924	10387	-1	ENSMUST00000021384	4308	-1	ENSMUST00000022690	7353	-1	ENSMUST00000024708	10853	-1	ENSMUST00000026043	33544	-1	ENSMUST00000027706	53587	-1	ENSMUST00000029311	64301	-1	ENSMUST00000030731	11789	-1	ENSMUST00000032214	955	-1	ENSMUST00000034049	3535	-1
ENSMUST00000057204	4313	1	ENSMUST00000019924	10440	-1	ENSMUST00000021384	4454	-1	ENSMUST00000022690	7885	-1	ENSMUST00000024708	11399	-1	ENSMUST00000026043	33669	-1	ENSMUST00000027706	55524	-1	ENSMUST00000029311	66967	-1	ENSMUST00000030731	11844	-1	ENSMUST00000032228	11687	-1	ENSMUST00000034049	3563	-1
ENSMUST00000057204	4338	1	ENSMUST00000019924	1658	-1	ENSMUST00000021384	4931	-1	ENSMUST00000022690	8805	-1	ENSMUST00000024708	14766	-1	ENSMUST00000026043	35266	-1	ENSMUST00000027706	56117	-1	ENSMUST00000029311	67968	-1	ENSMUST00000030731	12182	-1	ENSMUST00000032228	15723	-1	ENSMUST00000034049	3685	-1
ENSMUST00000057204	4661	1	ENSMUST00000019924	1681	-1	ENSMUST00000021384	4938	-1	ENSMUST00000022690	9920	-1	ENSMUST00000024708	15135	-1	ENSMUST00000026043	35551	-1	ENSMUST00000027706	56689	-1	ENSMUST00000029311	68922	-1	ENSMUST00000030731	1236	-1	ENSMUST00000032228	16713	-1	ENSMUST00000034049	3863	-1
ENSMUST00000057204	4720	1	ENSMUST00000019924	1851	-1	ENSMUST00000021384	5218	-1	ENSMUST00000022690	9968	-1	ENSMUST00000024708	15586	-1	ENSMUST00000026043	36685	-1	ENSMUST00000027706	5687	-1	ENSMUST00000029311	77204	-1	ENSMUST00000030731	12451	-1	ENSMUST00000032228	18374	-1	ENSMUST00000034049	3887	-1
ENSMUST00000057204	4954	1	ENSMUST00000019924	2003	-1	ENSMUST00000021384	5385	-1	ENSMUST00000022699	1007	-1	ENSMUST00000024708	15670	-1	ENSMUST00000026043	40350	-1	ENSMUST00000027706	58428	-1	ENSMUST00000029311	77279	-1	ENSMUST00000030731	12599	-1	ENSMUST00000032228	19014	-1	ENSMUST00000034049	3900	-1
ENSMUST00000057204	5724	1	ENSMUST00000019924	224	-1	ENSMUST00000021384	5392	-1	ENSMUST00000022699	10087	-1	ENSMUST00000024708	16253	-1	ENSMUST00000026043	4084	-1	ENSMUST00000027706	6198	-1	ENSMUST00000029311	78250	-1	ENSMUST00000030731	12731	-1	ENSMUST00000032228	20504	-1	ENSMUST00000034049	3921	-1
ENSMUST00000076431	514	1	ENSMUST00000019924	2408	-1	ENSMUST00000021384	5462	-1	ENSMUST00000022699	12374	-1	ENSMUST00000024708	1662	-1	ENSMUST00000026043	42966	-1	ENSMUST00000027706	7941	-1	ENSMUST00000029311	8218	-1	ENSMUST00000030731	13916	-1	ENSMUST00000032228	21078	-1	ENSMUST00000034049	3969	-1
ENSMUST00000076431	7502	1	ENSMUST00000019924	2440	-1	ENSMUST00000021384	5601	-1	ENSMUST00000022699	12520	-1	ENSMUST00000024708	17112	-1	ENSMUST00000026043	43651	-1	ENSMUST00000027706	7977	-1	ENSMUST00000029311	86382	-1	ENSMUST00000030731	13992	-1	ENSMUST00000032228	22058	-1	ENSMUST00000034049	4017	-1
ENSMUST00000076431	7512	1	ENSMUST00000019924	25	-1	ENSMUST00000021384	569	-1	ENSMUST00000022699	14197	-1	ENSMUST00000024708	18876	-1	ENSMUST00000026043	43701	-1	ENSMUST00000027706	954	-1	ENSMUST00000029311	88368	-1	ENSMUST00000030731	14424	-1	ENSMUST00000032228	234	-1	ENSMUST00000034049	4051	-1
ENSMUST00000076431	7635	1	ENSMUST00000019924	2576	-1	ENSMUST00000021384	5827	-1	ENSMUST00000022699	15129	-1	ENSMUST00000024708	19997	-1	ENSMUST00000026043	45166	-1	ENSMUST00000027706	9980	-1	ENSMUST00000029311	91197	-1	ENSMUST00000030731	14428	-1	ENSMUST00000032228	2347	-1	ENSMUST00000034049	4059	-1
ENSMUST00000076431	7365	1	ENSMUST00000019924	3313	-1	ENSMUST00000021384	5856	-1	ENSMUST00000022699	17147	-1	ENSMUST00000024708	20262	-1	ENSMUST00000026043	457	-1	ENSMUST00000027736	10042	-1	ENSMUST00000029311	97071	-1	ENSMUST00000030731	1457	-1	ENSMUST00000032228	23612	-1	ENSMUST00000034049	4135	-1
ENSMUST00000145701	1459	1	ENSMUST00000019924	3385	-1	ENSMUST00000021384	6149	-1	ENSMUST00000022699	20886	-1	ENSMUST00000024708	2143	-1	ENSMUST00000026043	45893	-1	ENSMUST00000027736	10247	-1	ENSMUST00000029311	98597	-1	ENSMUST00000030731	1494	-1	ENSMUST00000032228	25479	-1	ENSMUST00000034049	4146	-1
ENSMUST00000114082	431	1	ENSMUST00000019924	3400	-1	ENSMUST00000021384	6896	-1	ENSMUST00000022699	21386	-1	ENSMUST00000024708	22479	-1	ENSMUST00000026043	4749	-1	ENSMUST00000027736	10309	-1	ENSMUST00000029326	105	-1	ENSMUST00000030731	15267	-1	ENSMUST00000032228	26456	-1	ENSMUST00000034049	4218	-1
ENSMUST00000114082	443	1	ENSMUST00000019924	3406	-1	ENSMUST00000021384	6902	-1	ENSMUST00000022699	22715	-1	ENSMUST00000024708	23600	-1	ENSMUST00000026043	49314	-1	ENSMUST00000027736	11081	-1	ENSMUST00000029326	1181	-1	ENSMUST00000030731	15785	-1	ENSMUST00000032228	26494	-1	ENSMUST00000034049	4263	-1
ENSMUST00000114082	1015	1	ENSMUST00000019924	3680	-1	ENSMUST00000021384	6937	-1	ENSMUST00000022699	24717	-1	ENSMUST00000024708	24115	-1	ENSMUST00000026043	49439	-1	ENSMUST00000027736	11194	-1	ENSMUST00000029326	1263	-1	ENSMUST00000030731	15866	-1	ENSMUST00000032228	27004	-1	ENSMUST00000034049	4293	-1
ENSMUST00000114082	1355	1	ENSMUST00000019924	3686	-1	ENSMUST00000021384	7047	-1	ENSMUST00000022699	25272	-1	ENSMUST00000024708	24765	-1	ENSMUST00000026043	49466	-1	ENSMUST00000027736	11273	-1	ENSMUST00000029326	1465	-1	ENSMUST00000030731	16714	-1	ENSMUST00000032228	27412	-1	ENSMUST00000034049	4342	-1
ENSMUST00000114082	29359	1	ENSMUST00000019924	4275	-1	ENSMUST00000021384	7175	-1	ENSMUST00000022699	25824	-1	ENSMUST00000024708	26591	-1	ENSMUST00000026043	50118	-1	ENSMUST00000027736	11685	-1	ENSMUST00000029326	1511	-1	ENSMUST00000030731	17174	-1	ENSMUST00000032228	28130	-1	ENSMUST00000034049	4467	-1
ENSMUST00000114082	29411	1	ENSMUST00000019924	4369	-1	ENSMUST00000021384	7196	-1	ENSMUST00000022699	26627	-1	ENSMUST00000024708	26627	-1	ENSMUST00000026043	50126	-1	ENSMUST00000027736	12454	-1	ENSMUST00000029326	1892	-1	ENSMUST00000030731	17574	-1	ENSMUST00000032228	28411	-1	ENSMUST00000034049	4476	-1
ENSMUST00000114082	29517	1	ENSMUST00000019924	4600	-1	ENSMUST00000021384	7507	-1	ENSMUST00000022699	26798	-1	ENSMUST00000024708	28078	-1	ENSMUST00000026043	54528	-1	ENSMUST00000027736	12637	-1	ENSMUST00000029326	203	-1	ENSMUST00000030731	18126	-1	ENSMUST00000032228	28693	-1	ENSMUST00000034049	461	-1
ENSMUST00000114082	29534	1	ENSMUST00000019924	5173	-1	ENSMUST00000021384	7520	-1	ENSMUST00000022699	27056	-1	ENSMUST00000024708	29410	-1	ENSMUST00000026043	54755	-1	ENSMUST00000027736	13623	-1	ENSMUST00000029326	2071	-1	ENSMUST00000030731	18212	-1	ENSMUST00000032228	2932	-1	ENSMUST00000034049	740	-1
ENSMUST00000114082	29561	1	ENSMUST00000019924	5215	-1	ENSMUST00000021384	7528	-1	ENSMUST00000022699	27816	-1	ENSMUST00000024708	29809	-1	ENSMUST00000026043	54947	-1	ENSMUST00000027736	13637	-1	ENSMUST00000029326	2093	-1	ENSMUST00000030731	18312	-1	ENSMUST00000032228	29643	-1	ENSMUST00000034049	875	-1
ENSMUST00000114082	30364	1	ENSMUST00000019924	5285	-1	ENSMUST00000021384	7611	-1	ENSMUST00000022699	27859	-1	ENSMUST00000024708	30107	-1	ENSMUST00000026043	56119	-1	ENSMUST00000027736	14187	-1	ENSMUST00000029326	212	-1	ENSMUST00000030731	18343	-1	ENSMUST00000032228	30411	-1	ENSMUST00000034049	944	-1
ENSMUST00000114082	32398	1	ENSMUST00000019924	541	-1	ENSMUST00000021384	7796	-1	ENSMUST00000022699	29507	-1	ENSMUST00000024708	30763	-1	ENSMUST00000026043	56617	-1	ENSMUST00000027736	14248	-1	ENSMUST00000029326	2478	-1	ENSMUST00000030731	18903	-1	ENSMUST00000032228	33826	-1	ENSMUST00000034049	971	-1
ENSMUST00000114082	31145	1	ENSMUST00000019924	5532	-1	ENSMUST00000021384	7860	-1	ENSMUST00000022699	29677	-1	ENSMUST00000024708	31193	-1	ENSMUST00000026043	57585	-1	ENSMUST00000027736	14667	-1	ENSMUST00000029326	2524	-1	ENSMUST00000030731	18934	-1	ENSMUST00000032228	34060	-1	ENSMUST00000034056	10050	-1
ENSMUST00000114082	32394	1	ENSMUST00000019924	5682	-1	ENSMUST00000021384	7944	-1	ENSMUST00000022699	33670	-1	ENSMUST00000024708	31380	-1	ENSMUST00000026043	59232	-1	ENSMUST00000027736	15500	-1	ENSMUST00000029326	2620	-1	ENSMUST00000030731	19493	-1	ENSMUST00000032228	34529	-1	ENSMUST00000034056	10184	-1
ENSMUST00000028288	797	1	ENSMUST00000019924	5689	-1	ENSMUST00000021384	7961	-1	ENSMUST00000022699	34879	-1	ENSMUST00000024708	33326	-1	ENSMUST00000026043	59414	-1	ENSMUST00000027736	15823	-1	ENSMUST00000029326	2681	-1	ENSMUST00000030731	19897	-1	ENSMUST00000032228	35538	-1	ENSMUST00000034056	10338	-1
ENSMUST00000028288	819	1	ENSMUST00000019924	5789	-1	ENSMUST00000021384	8015	-1	ENSMUST00000022699	35865	-1	ENSMUST00000024708	3398	-1	ENSMUST00000026043	60072	-1	ENSMUST00000027736	176	-1	ENSMUST00000029326	2722	-1	ENSMUST00000030731	19960	-1	ENSMUST00000032228	35623	-1	ENSMUST00000034056	10558	-1
ENSMUST00000028288	417	1	ENSMUST00000019924	5859	-1	ENSMUST00000021384	8073	-1	ENSMUST00000022699	37190	-1	ENSMUST00000024708	34964	-1	ENSMUST00000026043	60377	-1	ENSMUST00000027736	17633	-1	ENSMUST00000029326	2914	-1	ENSMUST00000030731	2048	-1	ENSMUST00000032228	35880	-1	ENSMUST00000034056	10996	-1
ENSMUST00000028288	698	1	ENSMUST00000019924	6155	-1	ENSMUST00000021384	8245	-1	ENSMUST00000022699	37483	-1	ENSMUST00000024708	36519	-1	ENSMUST00000026043	60545	-1	ENSMUST00000027736	17808	-1	ENSMUST00000029326	2991	-1	ENSMUST00000030731	20705	-1	ENSMUST00000032228	37189	-1	ENSMUST00000034056	11089	-1
ENSMUST00000028288	2731	1	ENSMUST00000019924	6190	-1	ENSMUST00000021384	8475	-1	ENSMUST00000022699	38257	-1	ENSMUST00000024708	37492	-1	ENSMUST00000026043	65339	-1	ENSMUST00000027736	18209	-1	ENSMUST00000029326	3033	-1	ENSMUST00000030731	2086	-1	ENSMUST00000032228	37532	-1	ENSMUST00000034056	1109	-1
ENSMUST00000028286	221	1	ENSMUST00000019924	6333	-1	ENSMUST00000021384	8494	-1	ENSMUST00000022699	38443	-1	ENSMUST00000024708	37540	-1	ENSMUST00000026043	763	-1	ENSMUST00000027736	18816	-1	ENSMUST00000029326	3089	-1	ENSMUST00000030731	20943	-1	ENSMUST00000032228	38213	-1	ENSMUST00000034056	11283	-1
ENSMUST00000028286	358	1	ENSMUST00000019924	6368	-1	ENSMUST00000021384	8687	-1	ENSMUST00000022699	38863	-1	ENSMUST00000024708	39024	-1	ENSMUST00000026043	8350	-1	ENSMUST00000027736	19225	-1	ENSMUST00000029326	3179	-1	ENSMUST00000030731	2123	-1	ENSMUST00000032228	38277	-1	ENSMUST00000034056	11370	-1
ENSMUST00000028286	478	1	ENSMUST00000019924	6516	-1	ENSMUST00000021384	8979	-1	ENSMUST00000022699	42962	-1	ENSMUST00000024708	39870	-1	ENSMUST00000026043	8471	-1	ENSMUST00000027736	22040	-1	ENSMUST00000029326	3230	-1	ENSMUST00000030731	2373	-1	ENSMUST00000032228	38704	-1	ENSMUST00000034056	11504	-1
ENSMUST00000074240	7394	1	ENSMUST00000019924	6610	-1	ENSMUST00000021384	9137	-1	ENSMUST00000022699	45766	-1	ENSMUST00000024708	42215	-1	ENSMUST00000026043	8657	-1	ENSMUST00000027736	22464	-1	ENSMUST00000029326	3398	-1	ENSMUST00000030731	2391	-1	ENSMUST00000032228	39648	-1	ENSMUST00000034056	1184	-1
ENSMUST00000074240	7615	1	ENSMUST00000019924	6825	-1	ENSMUST00000021384	9492	-1	ENSMUST00000022699	50251	-1	ENSMUST00000024708	45969	-1	ENSMUST00000026043	8705	-1	ENSMUST00000027736	23403	-1	ENSMUST00000029326	3476	-1	ENSMUST00000030731	2863	-1	ENSMUST00000032228	39672	-1	ENSMUST00000034056	12081	-1
ENSMUST00000074240	7678	1	ENSMUST00000019924	7202	-1	ENSMUST00000021412	10318	-1	ENSMUST00000022699	52077	-1	ENSMUST00000024708	47290	-1	ENSMUST00000026043	8788	-1	ENSMUST00000027736	23765	-1	ENSMUST00000029326	369	-1	ENSMUST00000030731	3052	-1	ENSMUST00000032228	4043	-1	ENSMUST00000034056	12136	-1
ENSMUST00000074240	7693	1	ENSMUST00000019924	7271	-1	ENSMUST00000021412	10786	-1	ENSMUST00000022699	52629	-1	ENSMUST00000024708	48055	-1	ENSMUST00000026043	9476	-1	ENSMUST00000027736	24483	-1	ENSMUST00000029326	390	-1	ENSMUST00000030731	3475	-1	ENSMUST00000032228	40565	-1	ENSMUST00000034056	1218	-1
ENSMUST00000074240	7802	1	ENSMUST00000019924	7495	-1	ENSMUST00000021412	11434	-1	ENSMUST00000022699	53009	-1	ENSMUST00000024708	48070	-1	ENSMUST00000026043	9886	-1	ENSMUST00000027736	25244	-1	ENSMUST00000029326	3965	-1	ENSMUST00000030731	3558	-1	ENSMUST00000032228	41363	-1	ENSMUST00000034056	12480	-1
ENSMUST00000047632	1837	1	ENSMUST00000019924	7656	-1	ENSMUST00000021412	11523	-1	ENSMUST00000022699	55116	-1	ENSMUST00000024708	49169	-1	ENSMUST00000026062	10832	-1	ENSMUST00000027736	25803	-1	ENSMUST00000029326	40	-1	ENSMUST00000030731	3834	-1	ENSMUST00000032228	4142	-1	ENSMUST00000034056	12484	-1
ENSMUST00000102899	2631	1	ENSMUST00000019924	7681	-1	ENSMUST00000021412	11579	-1	ENSMUST00000022699	55358	-1	ENSMUST00000024708	51137	-1	ENSMUST00000026062	11365	-1	ENSMUST00000027736	25967	-1	ENSMUST00000029326	4004	-1	ENSMUST00000030731	4152	-1	ENSMUST00000032228	41819	-1	ENSMUST00000034056	12512	-1
ENSMUST00000015011	1734	1	ENSMUST00000019924	7803	-1	ENSMUST00000021412	116	-1	ENSMUST00000022699	56675	-1	ENSMUST00000024708	51944	-1	ENSMUST00000026062	11699	-1	ENSMUST00000027736	26154	-1	ENSMUST00000029326	4283	-1	ENSMUST00000030731	4692	-1	ENSMUST00000032228	42094	-1	ENSMUST00000034056	12551	-1
ENSMUST00000015011	2006	1	ENSMUST00000019924	8103	-1	ENSMUST00000021412	12081	-1	ENSMUST00000022699	59762	-1	ENSMUST00000024708	54403	-1	ENSMUST00000026062	12170	-1	ENSMUST00000027736	26474	-1	ENSMUST00000029326	4339	-1	ENSMUST00000030731	4696	-1	ENSMUST00000032228	42102	-1	ENSMUST00000034056	12591	-1
ENSMUST00000064244	165	1	ENSMUST00000019924	8224	-1	ENSMUST00000021412	1271	-1	ENSMUST00000022699	60524	-1	ENSMUST00000024708	55659	-1	ENSMUST00000026062	12237	-1	ENSMUST00000027736	2757	-1	ENSMUST00000029326	4363	-1	ENSMUST00000030731	546	-1	ENSMUST00000032228	43504	-1	ENSMUST00000034056	12674	-1
ENSMUST00000064244	174	1	ENSMUST00000019924	8289	-1	ENSMUST00000021412	13234	-1	ENSMUST00000022699	62901	-1	ENSMUST00000024708	55709	-1	ENSMUST00000026062	12483	-1	ENSMUST00000027736	27596	-1	ENSMUST00000029326	4378	-1	ENSMUST00000030731	5568	-1	ENSMUST00000032228	43691	-1	ENSMUST00000034056	12981	-1
ENSMUST00000064244	182	1	ENSMUST00000019924	8316	-1	ENSMUST00000021412	13520	-1	ENSMUST00000022699	64922	-1	ENSMUST00000024708	5771	-1	ENSMUST00000026062	13255	-1	ENSMUST00000027736	28195	-1	ENSMUST00000029326	4437	-1	ENSMUST00000030731	5810	-1	ENSMUST00000032228	43727	-1	ENSMUST00000034056	13021	-1
ENSMUST00000114007	5829	1	ENSMUST00000019924	9004	-1	ENSMUST00000021412	13806	-1	ENSMUST00000022699	65102	-1	ENSMUST00000024708	58341	-1	ENSMUST00000026062	14118	-1	ENSMUST00000027736	28522	-1	ENSMUST00000029326	4528	-1	ENSMUST00000030731	5936	-1	ENSMUST00000032228	45977	-1	ENSMUST00000034056	13343	-1
ENSMUST00000114007	9002	1	ENSMUST00000019924	9020	-1	ENSMUST00000021412	13850	-1	ENSMUST00000022699	65376	-1	ENSMUST00000024708	58686	-1	ENSMUST00000026062	14150	-1	ENSMUST00000027736	28537	-1	ENSMUST00000029326	4746	-1	ENSMUST00000030731	637	-1	ENSMUST00000032228	46107	-1	ENSMUST00000034056	13820	-1
ENSMUST00000114007	9205	1	ENSMUST00000019924	9419	-1	ENSMUST00000021412	14276	-1	ENSMUST00000022699	66969	-1	ENSMUST00000024708	59111	-1	ENSMUST00000026062	14362	-1	ENSMUST00000027736	28784	-1	ENSMUST00000029326	5029	-1	ENSMUST00000030731	6389	-1	ENSMUST00000032228	46290	-1	ENSMUST00000034056	13921	-1
ENSMUST00000114007	10124	1	ENSMUST00000019924	9600	-1	ENSMUST00000021412	14653	-1	ENSMUST00000022699	68839	-1	ENSMUST00000024708	59767	-1	ENSMUST00000026062	1528	-1	ENSMUST00000027736	28910	-1	ENSMUST00000029326	512	-1	ENSMUST00000030731	676	-1	ENSMUST00000032228	46340	-1	ENSMUST00000034056	14653	-1
ENSMUST00000114007	10129	1	ENSMUST00000019924	9698	-1	ENSMUST00000021412	14758	-1	ENSMUST00000022699	71656	-1	ENSMUST00000024708	6096	-1	ENSMUST00000026062	15348	-1	ENSMUST00000027736	28992	-1	ENSMUST00000029326	5133	-1	ENSMUST00000030731	8508	-1	ENSMUST00000032228	47466	-1	ENSMUST00000034056	14803	-1
ENSMUST00000114007	10144	1	ENSMUST00000019924	9894	-1	ENSMUST00000021412	15155	-1	ENSMUST00000022699	72523	-1	ENSMUST00000024708	63358	-1	ENSMUST00000026062	15400	-1	ENSMUST00000027736	3261	-1	ENSMUST00000029326	5175	-1	ENSMUST00000030731	9247	-1	ENSMUST00000032228	48469	-1	ENSMUST00000034056	1528	-1
ENSMUST00000114007	10495	1	ENSMUST00000019931	10318	-1	ENSMUST00000021412	15342	-1	ENSMUST00000022699	74674	-1	ENSMUST00000024708	640	-1	ENSMUST00000026062	15471	-1	ENSMUST00000027736	32658	-1	ENSMUST00000029326	5210	-1	ENSMUST00000030739	105432	-1	ENSMUST00000032228	48619	-1	ENSMUST00000034056	1608	-1
ENSMUST00000114007	10533	1	ENSMUST00000019931	1225	-1	ENSMUST00000021412	15674	-1	ENSMUST00000022699	75326	-1	ENSMUST00000024708	64174	-1	ENSMUST00000026062	15489	-1	ENSMUST00000027736	33457	-1	ENSMUST00000029326	5368	-1	ENSMUST00000030739	110318	-1	ENSMUST00000032228	48781	-1	ENSMUST00000034056	1891	-1
ENSMUST00000151224	1897	1	ENSMUST00000019931	12308	-1	ENSMUST00000021412	16080	-1	ENSMUST00000022699	76962	-1	ENSMUST00000024708	64286	-1	ENSMUST00000026062	16236	-1	ENSMUST00000027736	34281	-1	ENSMUST00000029326	5389	-1	ENSMUST00000030739	111227	-1	ENSMUST00000032228	5414	-1	ENSMUST00000034056	2064	-1
ENSMUST00000151224	2279	1	ENSMUST00000019931	12821	-1	ENSMUST00000021412	16245	-1	ENSMUST00000022699	77233	-1	ENSMUST00000024708	66282	-1	ENSMUST00000026062	1634	-1	ENSMUST00000027736	37289	-1	ENSMUST00000029326	563	-1	ENSMUST00000030739	114018	-1	ENSMUST00000032228	7319	-1	ENSMUST00000034056	2087	-1
ENSMUST00000000910	17756	1	ENSMUST00000019931	12895	-1	ENSMUST00000021412	17184	-1	ENSMUST00000022699	77676	-1	ENSMUST00000024708	67610	-1	ENSMUST00000026062	16417	-1	ENSMUST00000027736	3772	-1	ENSMUST00000029326	686	-1	ENSMUST00000030739	114992	-1	ENSMUST00000032228	829	-1	ENSMUST00000034056	218	-1
ENSMUST00000000910	17771	1	ENSMUST00000019931	13124	-1	ENSMUST00000021412	17639	-1	ENSMUST00000022699	77749	-1	ENSMUST00000024708	68676	-1	ENSMUST00000026062	16730	-1	ENSMUST00000027736	3848	-1	ENSMUST00000029326	901	-1	ENSMUST00000030739	11510	-1	ENSMUST00000032237	10307	-1	ENSMUST00000034056	2323	-1
ENSMUST00000056176	172	1	ENSMUST00000019931	14079	-1	ENSMUST00000021412	17721	-1	ENSMUST00000022699	77900	-1	ENSMUST00000024708	69178	-1	ENSMUST00000026062	17099	-1	ENSMUST00000027736	38816	-1	ENSMUST00000029327	103012	-1	ENSMUST00000030739	115145	-1	ENSMUST00000032237	1170	-1	ENSMUST00000034056	2454	-1
ENSMUST00000028282	1274	1	ENSMUST00000019931	14590	-1	ENSMUST00000021412	1788	-1	ENSMUST00000022699	78358	-1	ENSMUST00000024708	71514	-1	ENSMUST00000026062	17171	-1	ENSMUST00000027736	38959	-1	ENSMUST00000029327	103923	-1	ENSMUST00000030739	118900	-1	ENSMUST00000032237	12120	-1	ENSMUST00000034056	2700	-1
ENSMUST00000028282	2880	1	ENSMUST00000019931	1470	-1	ENSMUST00000021412	17885	-1	ENSMUST00000022699	78759	-1	ENSMUST00000024708	72187	-1	ENSMUST00000026062	1847	-1	ENSMUST00000027736	38989	-1	ENSMUST00000029327	105513	-1	ENSMUST00000030739	121010	-1	ENSMUST00000032237	12413	-1	ENSMUST00000034056	2869	-1
ENSMUST00000028282	2886	1	ENSMUST00000019931	14711	-1	ENSMUST00000021412	17915	-1	ENSMUST00000022699	78953	-1	ENSMUST00000024708	7220	-1	ENSMUST00000026062	19484	-1	ENSMUST00000027736	39011	-1	ENSMUST00000029327	107802	-1	ENSMUST00000030739	121082	-1	ENSMUST00000032237	12557	-1	ENSMUST00000034056	300	-1
ENSMUST00000028282	2874	1	ENSMUST00000019931	14722	-1	ENSMUST00000021412	18147	-1	ENSMUST00000022699	79337	-1	ENSMUST00000024708	72445	-1	ENSMUST00000026062	20052	-1	ENSMUST00000027736	39172	-1	ENSMUST00000029327	111561	-1	ENSMUST00000030739	123066	-1	ENSMUST00000032237	13040	-1	ENSMUST00000034056	410	-1
ENSMUST00000028282	2897	1	ENSMUST00000019931	15263	-1	ENSMUST00000021412	18357	-1	ENSMUST00000022699	8275	-1	ENSMUST00000024708	7353	-1	ENSMUST00000026062	20088	-1	ENSMUST00000027736	39525	-1	ENSMUST00000029327	117198	-1	ENSMUST00000030739	123494	-1	ENSMUST00000032237	13852	-1	ENSMUST00000034056	4496	-1
ENSMUST00000028282	7384	1	ENSMUST00000019931	1546	-1	ENSMUST00000021412	18394	-1	ENSMUST00000022699	85501	-1	ENSMUST00000024708	8387	-1	ENSMUST00000026062	22432	-1	ENSMUST00000027736	39859	-1	ENSMUST00000029327	117970	-1	ENSMUST00000030739	12492	-1	ENSMUST00000032237	14763	-1	ENSMUST00000034056	4564	-1
ENSMUST00000028282	7396	1	ENSMUST00000019931	15607	-1	ENSMUST00000021412	19665	-1	ENSMUST00000022699	85960	-1	ENSMUST00000024708	8481	-1	ENSMUST00000026062	22710	-1	ENSMUST00000027736	40146	-1	ENSMUST00000029327	124726	-1	ENSMUST00000030739	128573	-1	ENSMUST00000032237	14845	-1	ENSMUST00000034056	5026	-1
ENSMUST00000077257	83436	1	ENSMUST00000019931	1595	-1	ENSMUST00000021412	1967	-1	ENSMUST00000022699	86933	-1	ENSMUST00000024708	9287	-1	ENSMUST00000026062	23021	-1	ENSMUST00000027736	40756	-1	ENSMUST00000029327	17376	-1	ENSMUST00000030739	1351	-1	ENSMUST00000032237	15551	-1	ENSMUST00000034056	5623	-1
ENSMUST00000077257	85607	1	ENSMUST00000019931	15957	-1	ENSMUST00000021412	2208	-1	ENSMUST00000022699	87427	-1	ENSMUST00000024709	10992	-1	ENSMUST00000026062	23869	-1	ENSMUST00000027736	4241	-1	ENSMUST00000029327	21865	-1	ENSMUST00000030739	135537	-1	ENSMUST00000032237	15989	-1	ENSMUST00000034056	5698	-1
ENSMUST00000077257	83340	1	ENSMUST00000019931	16522	-1	ENSMUST00000021412	2927	-1	ENSMUST00000022699	88808	-1	ENSMUST00000024709	11924	-1	ENSMUST00000026062	24046	-1	ENSMUST00000027736	4590	-1	ENSMUST00000029327	25428	-1	ENSMUST00000030739	137960	-1	ENSMUST00000032237	16174	-1	ENSMUST00000034056	5821	-1
ENSMUST00000077257	83461	1	ENSMUST00000019931	17711	-1	ENSMUST00000021412	3130	-1	ENSMUST00000022699	9395	-1	ENSMUST00000024709	13345	-1	ENSMUST00000026062	25150	-1	ENSMUST00000027736	5522	-1	ENSMUST00000029327	25628	-1	ENSMUST00000030739	139100	-1	ENSMUST00000032237	17017	-1	ENSMUST00000034056	5967	-1
ENSMUST00000077257	83471	1	ENSMUST00000019931	1867	-1	ENSMUST00000021412	3135	-1	ENSMUST00000022699	9535	-1	ENSMUST00000024709	15191	-1	ENSMUST00000026062	26191	-1	ENSMUST00000027736	5635	-1	ENSMUST00000029327	26572	-1	ENSMUST00000030739	141922	-1	ENSMUST00000032237	18316	-1	ENSMUST00000034056	5972	-1
ENSMUST00000077257	85600	1	ENSMUST00000019931	19116	-1	ENSMUST00000021412	3865	-1	ENSMUST00000022699	9598	-1	ENSMUST00000024709	15559	-1	ENSMUST00000026062	26668	-1	ENSMUST00000027736	6024	-1	ENSMUST00000029327	26894	-1	ENSMUST00000030739	142322	-1	ENSMUST00000032237	18967	-1	ENSMUST00000034056	6321	-1
ENSMUST00000077257	85636	1	ENSMUST00000019931	19753	-1	ENSMUST00000021412	4	-1	ENSMUST00000022701	102189	-1	ENSMUST00000024709	16398	-1	ENSMUST00000026062	26992	-1	ENSMUST00000027736	6200	-1	ENSMUST00000029327	28072	-1	ENSMUST00000030739	147881	-1	ENSMUST00000032237	19244	-1	ENSMUST00000034056	6408	-1
ENSMUST00000028177	23597	1	ENSMUST00000019931	19963	-1	ENSMUST00000021412	4055	-1	ENSMUST00000022701	102457	-1	ENSMUST00000024709	18922	-1	ENSMUST00000026062	27067	-1	ENSMUST00000027736	7109	-1	ENSMUST00000029327	30384	-1	ENSMUST00000030739	16471	-1	ENSMUST00000032237	19545	-1	ENSMUST00000034056	6447	-1
ENSMUST00000028177	23609	1	ENSMUST00000019931	20282	-1	ENSMUST00000021412	406	-1	ENSMUST00000022701	109299	-1	ENSMUST00000024709	19697	-1	ENSMUST00000026062	2895	-1	ENSMUST00000027736	7146	-1	ENSMUST00000029327	32091	-1	ENSMUST00000030739	19817	-1	ENSMUST00000032237	20174	-1	ENSMUST00000034056	6947	-1
ENSMUST00000028177	23622	1	ENSMUST00000019931	20979	-1	ENSMUST00000021412	5417	-1	ENSMUST00000022701	109578	-1	ENSMUST00000024709	19775	-1	ENSMUST00000026062	29113	-1	ENSMUST00000027736	8426	-1	ENSMUST00000029327	37968	-1	ENSMUST00000030739	20260	-1	ENSMUST00000032237	20574	-1	ENSMUST00000034056	7083	-1
ENSMUST00000028177	23637	1	ENSMUST00000019931	21223	-1	ENSMUST00000021412	5898	-1	ENSMUST00000022701	110462	-1	ENSMUST00000024709	20877	-1	ENSMUST00000026062	292	-1	ENSMUST00000027736	864	-1	ENSMUST00000029327	38470	-1	ENSMUST00000030739	2155	-1	ENSMUST00000032237	21216	-1	ENSMUST00000034056	7115	-1
ENSMUST00000028177	23928	1	ENSMUST00000019931	21879	-1	ENSMUST00000021412	6135	-1	ENSMUST00000022701	112329	-1	ENSMUST00000024709	22052	-1	ENSMUST00000026062	29778	-1	ENSMUST00000027736	9816	-1	ENSMUST00000029327	41201	-1	ENSMUST00000030739	21581	-1	ENSMUST00000032237	21978	-1	ENSMUST00000034056	7440	-1
ENSMUST00000028177	23943	1	ENSMUST00000019931	23982	-1	ENSMUST00000021412	6715	-1	ENSMUST00000022701	113200	-1	ENSMUST00000024709	22808	-1	ENSMUST00000026062	29865	-1	ENSMUST00000027741	105194	-1	ENSMUST00000029327	41241	-1	ENSMUST00000030739	217	-1	ENSMUST00000032237	22081	-1	ENSMUST00000034056	7556	-1
ENSMUST00000028177	23970	1	ENSMUST00000019931	24744	-1	ENSMUST00000021412	7017	-1	ENSMUST00000022701	115656	-1	ENSMUST00000024709	26609	-1	ENSMUST00000026062	30932	-1	ENSMUST00000027741	109455	-1	ENSMUST00000029327	41476	-1	ENSMUST00000030739	35747	-1	ENSMUST00000032237	22090	-1	ENSMUST00000034056	8113	-1
ENSMUST00000028177	23976	1	ENSMUST00000019931	24979	-1	ENSMUST00000021412	7669	-1	ENSMUST00000022701	115957	-1	ENSMUST00000024709	27076	-1	ENSMUST00000026062	31808	-1	ENSMUST00000027741	113194	-1	ENSMUST00000029327	4351	-1	ENSMUST00000030739	37425	-1	ENSMUST00000032237	22095	-1	ENSMUST00000034056	8235	-1
ENSMUST00000028177	23985	1	ENSMUST00000019931	25901	-1	ENSMUST00000021412	8349	-1	ENSMUST00000022701	122763	-1	ENSMUST00000024709	28402	-1	ENSMUST00000026062	33610	-1	ENSMUST00000027741	11556	-1	ENSMUST00000029327	43924	-1	ENSMUST00000030739	38864	-1	ENSMUST00000032237	23119	-1	ENSMUST00000034056	846	-1
ENSMUST00000028177	24006	1	ENSMUST00000019931	26219	-1	ENSMUST00000021412	8490	-1	ENSMUST00000022701	125521	-1	ENSMUST00000024709	28840	-1	ENSMUST00000026062	34471	-1	ENSMUST00000027741	116824	-1	ENSMUST00000029327	47305	-1	ENSMUST00000030739	39537	-1	ENSMUST00000032237	23589	-1	ENSMUST00000034056	8496	-1
ENSMUST00000028177	24129	1	ENSMUST00000019931	27025	-1	ENSMUST00000021412	8590	-1	ENSMUST00000022701	125555	-1	ENSMUST00000024709	3308	-1	ENSMUST00000026062	36982	-1	ENSMUST00000027741	11761	-1	ENSMUST00000029327	47759	-1	ENSMUST00000030739	43195	-1	ENSMUST00000032237	2426	-1	ENSMUST00000034056	9330	-1
ENSMUST00000028177	24158	1	ENSMUST00000019931	27157	-1	ENSMUST00000021412	8662	-1	ENSMUST00000022701	126766	-1	ENSMUST00000024709	33671	-1	ENSMUST00000026062	38297	-1	ENSMUST00000027741	118846	-1	ENSMUST00000029327	47978	-1	ENSMUST00000030739	43415	-1	ENSMUST00000032237	25169	-1	ENSMUST00000034060	101518	-1
ENSMUST00000028177	24281	1	ENSMUST00000019931	28219	-1	ENSMUST00000021412	9037	-1	ENSMUST00000022701	126869	-1	ENSMUST00000024709	33969	-1	ENSMUST00000026062	39253	-1	ENSMUST00000027741	121770	-1	ENSMUST00000029327	49377	-1	ENSMUST00000030739	4553	-1	ENSMUST00000032237	25332	-1	ENSMUST00000034060	10160	-1
ENSMUST00000028177	24340	1	ENSMUST00000019931	28362	-1	ENSMUST00000021412	9188	-1	ENSMUST00000022701	128447	-1	ENSMUST00000024709	35378	-1	ENSMUST00000026062	39743	-1	ENSMUST00000027741	122613	-1	ENSMUST00000029327	49984	-1	ENSMUST00000030739	49645	-1	ENSMUST00000032237	25389	-1	ENSMUST00000034060	108112	-1
ENSMUST00000028177	24385	1	ENSMUST00000019931	28393	-1	ENSMUST00000021412	9306	-1	ENSMUST00000022701	129744	-1	ENSMUST00000024709	3607	-1	ENSMUST00000026062	40336	-1	ENSMUST00000027741	125133	-1	ENSMUST00000029327	50352	-1	ENSMUST00000030739	51720	-1	ENSMUST00000032237	25616	-1	ENSMUST00000034060	110497	-1
ENSMUST00000028177	24410	1	ENSMUST00000019931	29316	-1	ENSMUST00000021412	9685	-1	ENSMUST00000022701	13375	-1	ENSMUST00000024709	36109	-1	ENSMUST00000026062	40770	-1	ENSMUST00000027741	125898	-1	ENSMUST00000029327	51797	-1	ENSMUST00000030739	52955	-1	ENSMUST00000032237	25827	-1	ENSMUST00000034060	110885	-1
ENSMUST00000028177	24593	1	ENSMUST00000019931	3116	-1	ENSMUST00000021413	1015	-1	ENSMUST00000022701	17934	-1	ENSMUST00000024709	37887	-1	ENSMUST00000026062	41329	-1	ENSMUST00000027741	126596	-1	ENSMUST00000029327	5210	-1	ENSMUST00000030739	53217	-1	ENSMUST00000032237	25913	-1	ENSMUST00000034060	111555	-1
ENSMUST00000040324	3148	1	ENSMUST00000019931	31316	-1	ENSMUST00000021413	1129	-1	ENSMUST00000022701	19464	-1	ENSMUST00000024709	38107	-1	ENSMUST00000026062	4151	-1	ENSMUST00000027741	127248	-1	ENSMUST00000029327	5487	-1	ENSMUST00000030739	5361	-1	ENSMUST00000032237	27108	-1	ENSMUST00000034060	111965	-1
ENSMUST00000040324	4271	1	ENSMUST00000019931	31456	-1	ENSMUST00000021413	1169	-1	ENSMUST00000022701	22033	-1	ENSMUST00000024709	3851	-1	ENSMUST00000026062	42029	-1	ENSMUST00000027741	128299	-1	ENSMUST00000029327	55508	-1	ENSMUST00000030739	54205	-1	ENSMUST00000032237	2749	-1	ENSMUST00000034060	117260	-1
ENSMUST00000040324	4362	1	ENSMUST00000019931	31916	-1	ENSMUST00000021413	1208	-1	ENSMUST00000022701	24533	-1	ENSMUST00000024709	39845	-1	ENSMUST00000026062	42589	-1	ENSMUST00000027741	130090	-1	ENSMUST00000029327	57011	-1	ENSMUST00000030739	54508	-1	ENSMUST00000032237	27760	-1	ENSMUST00000034060	117326	-1
ENSMUST00000040324	4534	1	ENSMUST00000019931	32063	-1	ENSMUST00000021413	1265	-1	ENSMUST00000022701	25118	-1	ENSMUST00000024709	40268	-1	ENSMUST00000026062	43566	-1	ENSMUST00000027741	130495	-1	ENSMUST00000029327	58222	-1	ENSMUST00000030739	54941	-1	ENSMUST00000032237	2797	-1	ENSMUST00000034060	1191	-1
ENSMUST00000040324	4764	1	ENSMUST00000019931	32210	-1	ENSMUST00000021413	1318	-1	ENSMUST00000022701	26844	-1	ENSMUST00000024709	40816	-1	ENSMUST00000026062	6321	-1	ENSMUST00000027741	13084	-1	ENSMUST00000029327	61786	-1	ENSMUST00000030739	58497	-1	ENSMUST00000032237	28410	-1	ENSMUST00000034060	119196	-1
ENSMUST00000040324	5286	1	ENSMUST00000019931	32221	-1	ENSMUST00000021413	1403	-1	ENSMUST00000022701	27026	-1	ENSMUST00000024709	41272	-1	ENSMUST00000026062	6891	-1	ENSMUST00000027741	131433	-1	ENSMUST00000029327	62589	-1	ENSMUST00000030739	6041	-1	ENSMUST00000032237	30786	-1	ENSMUST00000034060	119511	-1
ENSMUST00000040324	5355	1	ENSMUST00000019931	32281	-1	ENSMUST00000021413	1477	-1	ENSMUST00000022701	2816	-1	ENSMUST00000024709	42818	-1	ENSMUST00000026062	7304	-1	ENSMUST00000027741	131605	-1	ENSMUST00000029327	62849	-1	ENSMUST00000030739	61116	-1	ENSMUST00000032237	32159	-1	ENSMUST00000034060	124568	-1
ENSMUST00000040324	5636	1	ENSMUST00000019931	32383	-1	ENSMUST00000021413	150	-1	ENSMUST00000022701	29336	-1	ENSMUST00000024709	43418	-1	ENSMUST00000026062	8635	-1	ENSMUST00000027741	134770	-1	ENSMUST00000029327	66078	-1	ENSMUST00000030739	6140	-1	ENSMUST00000032237	32835	-1	ENSMUST00000034060	125950	-1
ENSMUST00000040324	5688	1	ENSMUST00000019931	32791	-1	ENSMUST00000021413	1593	-1	ENSMUST00000022701	30027	-1	ENSMUST00000024709	45175	-1	ENSMUST00000026063	10431	-1	ENSMUST00000027741	134923	-1	ENSMUST00000029327	6720	-1	ENSMUST00000030739	6184	-1	ENSMUST00000032237	33337	-1	ENSMUST00000034060	128680	-1
ENSMUST00000040324	5697	1	ENSMUST00000019931	34068	-1	ENSMUST00000021413	1617	-1	ENSMUST00000022701	32689	-1	ENSMUST00000024709	45351	-1	ENSMUST00000026063	10531	-1	ENSMUST00000027741	135599	-1	ENSMUST00000029327	67655	-1	ENSMUST00000030739	61988	-1	ENSMUST00000032237	34190	-1	ENSMUST00000034060	13298	-1
ENSMUST00000040324	5723	1	ENSMUST00000019931	34153	-1	ENSMUST00000021413	1725	-1	ENSMUST00000022701	32838	-1	ENSMUST00000024709	45635	-1	ENSMUST00000026063	1059	-1	ENSMUST00000027741	138644	-1	ENSMUST00000029327	68263	-1	ENSMUST00000030739	65307	-1	ENSMUST00000032237	34681	-1	ENSMUST00000034060	140935	-1
ENSMUST00000040324	5734	1	ENSMUST00000019931	3436	-1	ENSMUST00000021413	1732	-1	ENSMUST00000022701	34747	-1	ENSMUST00000024709	46499	-1	ENSMUST00000026063	10840	-1	ENSMUST00000027741	18231	-1	ENSMUST00000029327	72070	-1	ENSMUST00000030739	67973	-1	ENSMUST00000032237	4295	-1	ENSMUST00000034060	14456	-1
ENSMUST00000040324	5763	1	ENSMUST00000019931	35359	-1	ENSMUST00000021413	1851	-1	ENSMUST00000022701	35681	-1	ENSMUST00000024709	47453	-1	ENSMUST00000026063	1087	-1	ENSMUST00000027741	1828	-1	ENSMUST00000029327	73617	-1	ENSMUST00000030739	68224	-1	ENSMUST00000032237	4954	-1	ENSMUST00000034060	146013	-1
ENSMUST00000040324	5799	1	ENSMUST00000019931	4053	-1	ENSMUST00000021413	1954	-1	ENSMUST00000022701	36908	-1	ENSMUST00000024709	47793	-1	ENSMUST00000026063	12047	-1	ENSMUST00000027741	19776	-1	ENSMUST00000029327	75759	-1	ENSMUST00000030739	68318	-1	ENSMUST00000032237	5396	-1	ENSMUST00000034060	147041	-1
ENSMUST00000040324	7081	1	ENSMUST00000019931	4242	-1	ENSMUST00000021413	2000	-1	ENSMUST00000022701	45846	-1	ENSMUST00000024709	50844	-1	ENSMUST00000026063	12427	-1	ENSMUST00000027741	22733	-1	ENSMUST00000029327	76598	-1	ENSMUST00000030739	69153	-1	ENSMUST00000032237	5761	-1	ENSMUST00000034060	150617	-1
ENSMUST00000113869	45456	1	ENSMUST00000019931	6426	-1	ENSMUST00000021413	2022	-1	ENSMUST00000022701	46067	-1	ENSMUST00000024709	53774	-1	ENSMUST00000026063	12444	-1	ENSMUST00000027741	2754	-1	ENSMUST00000029327	80564	-1	ENSMUST00000030739	71389	-1	ENSMUST00000032237	7350	-1	ENSMUST00000034060	155385	-1
ENSMUST00000113869	45749	1	ENSMUST00000019931	7251	-1	ENSMUST00000021413	2084	-1	ENSMUST00000022701	49556	-1	ENSMUST00000024709	54138	-1	ENSMUST00000026063	12701	-1	ENSMUST00000027741	29967	-1	ENSMUST00000029327	81548	-1	ENSMUST00000030739	75051	-1	ENSMUST00000032237	7355	-1	ENSMUST00000034060	156025	-1
ENSMUST00000113869	45793	1	ENSMUST00000019931	7453	-1	ENSMUST00000021413	2214	-1	ENSMUST00000022701	52367	-1	ENSMUST00000024709	56104	-1	ENSMUST00000026063	12714	-1	ENSMUST00000027741	30912	-1	ENSMUST00000029327	87647	-1	ENSMUST00000030739	76756	-1	ENSMUST00000032237	8752	-1	ENSMUST00000034060	157505	-1
ENSMUST00000113869	45809	1	ENSMUST00000019931	7685	-1	ENSMUST00000021413	225	-1	ENSMUST00000022701	53770	-1	ENSMUST00000024709	57069	-1	ENSMUST00000026063	12823	-1	ENSMUST00000027741	30956	-1	ENSMUST00000029327	88636	-1	ENSMUST00000030739	80490	-1	ENSMUST00000032237	9658	-1	ENSMUST00000034060	158242	-1
ENSMUST00000113869	45824	1	ENSMUST00000019931	7860	-1	ENSMUST00000021413	2317	-1	ENSMUST00000022701	5501	-1	ENSMUST00000024709	59266	-1	ENSMUST00000026063	12847	-1	ENSMUST00000027741	33209	-1	ENSMUST00000029327	89153	-1	ENSMUST00000030739	82194	-1	ENSMUST00000032237	9772	-1	ENSMUST00000034060	158732	-1
ENSMUST00000113869	45875	1	ENSMUST00000019932	10355	-1	ENSMUST00000021413	2491	-1	ENSMUST00000022701	591	-1	ENSMUST00000024709	61456	-1	ENSMUST00000026063	12919	-1	ENSMUST00000027741	35642	-1	ENSMUST00000029327	96842	-1	ENSMUST00000030739	82713	-1	ENSMUST00000032237	9921	-1	ENSMUST00000034060	160656	-1
ENSMUST00000113869	45902	1	ENSMUST00000019932	10601	-1	ENSMUST00000021413	2528	-1	ENSMUST00000022701	59340	-1	ENSMUST00000024709	62441	-1	ENSMUST00000026063	13031	-1	ENSMUST00000027741	3708	-1	ENSMUST00000029327	99717	-1	ENSMUST00000030739	85984	-1	ENSMUST00000032264	1179	-1	ENSMUST00000034060	167940	-1
ENSMUST00000113869	46049	1	ENSMUST00000019932	11159	-1	ENSMUST00000021413	2752	-1	ENSMUST00000022701	59472	-1	ENSMUST00000024709	63544	-1	ENSMUST00000026063	13057	-1	ENSMUST00000027741	37346	-1	ENSMUST00000029331	1227	-1	ENSMUST00000030739	85991	-1	ENSMUST00000032264	1208	-1	ENSMUST00000034060	22185	-1
ENSMUST00000113869	49450	1	ENSMUST00000019932	11323	-1	ENSMUST00000021413	2861	-1	ENSMUST00000022701	60746	-1	ENSMUST00000024709	65195	-1	ENSMUST00000026063	13087	-1	ENSMUST00000027741	38302	-1	ENSMUST00000029331	1258	-1	ENSMUST00000030739	87184	-1	ENSMUST00000032264	1352	-1	ENSMUST00000034060	22989	-1
ENSMUST00000113869	45798	1	ENSMUST00000019932	12302	-1	ENSMUST00000021413	2915	-1	ENSMUST00000022701	6102	-1	ENSMUST00000024709	67060	-1	ENSMUST00000026063	13519	-1	ENSMUST00000027741	41749	-1	ENSMUST00000029331	1396	-1	ENSMUST00000030739	89243	-1	ENSMUST00000032264	1609	-1	ENSMUST00000034060	2384	-1
ENSMUST00000171404	2233	1	ENSMUST00000019932	12393	-1	ENSMUST00000021413	3001	-1	ENSMUST00000022701	61879	-1	ENSMUST00000024709	67618	-1	ENSMUST00000026063	14178	-1	ENSMUST00000027741	42445	-1	ENSMUST00000029331	1521	-1	ENSMUST00000030739	9013	-1	ENSMUST00000032264	1808	-1	ENSMUST00000034060	24712	-1
ENSMUST00000171404	2467	1	ENSMUST00000019932	12505	-1	ENSMUST00000021413	3045	-1	ENSMUST00000022701	62749	-1	ENSMUST00000024709	67905	-1	ENSMUST00000026063	14288	-1	ENSMUST00000027741	46104	-1	ENSMUST00000029331	1801	-1	ENSMUST00000030739	97782	-1	ENSMUST00000032264	1965	-1	ENSMUST00000034060	24951	-1
ENSMUST00000171404	3014	1	ENSMUST00000019932	13481	-1	ENSMUST00000021413	3055	-1	ENSMUST00000022701	62954	-1	ENSMUST00000024709	68141	-1	ENSMUST00000026063	14326	-1	ENSMUST00000027741	48678	-1	ENSMUST00000029331	1822	-1	ENSMUST00000030739	99507	-1	ENSMUST00000032264	2046	-1	ENSMUST00000034060	27164	-1
ENSMUST00000171404	3324	1	ENSMUST00000019932	14122	-1	ENSMUST00000021413	3222	-1	ENSMUST00000022701	68181	-1	ENSMUST00000024709	71558	-1	ENSMUST00000026063	1499	-1	ENSMUST00000027741	49967	-1	ENSMUST00000029331	1984	-1	ENSMUST00000030743	10266	-1	ENSMUST00000032264	2239	-1	ENSMUST00000034060	3254	-1
ENSMUST00000171404	3336	1	ENSMUST00000019932	14423	-1	ENSMUST00000021413	494	-1	ENSMUST00000022701	68787	-1	ENSMUST00000024709	72754	-1	ENSMUST00000026063	15437	-1	ENSMUST00000027741	51086	-1	ENSMUST00000029331	2050	-1	ENSMUST00000030743	1046	-1	ENSMUST00000032264	2389	-1	ENSMUST00000034060	36242	-1
ENSMUST00000171404	3341	1	ENSMUST00000019932	14435	-1	ENSMUST00000021413	708	-1	ENSMUST00000022701	76904	-1	ENSMUST00000024709	73317	-1	ENSMUST00000026063	15862	-1	ENSMUST00000027741	52433	-1	ENSMUST00000029331	2082	-1	ENSMUST00000030743	10574	-1	ENSMUST00000032264	2602	-1	ENSMUST00000034060	37547	-1
ENSMUST00000171404	3900	1	ENSMUST00000019932	14511	-1	ENSMUST00000021413	725	-1	ENSMUST00000022701	80744	-1	ENSMUST00000024709	77741	-1	ENSMUST00000026063	16084	-1	ENSMUST00000027741	53825	-1	ENSMUST00000029331	2119	-1	ENSMUST00000030743	11203	-1	ENSMUST00000032264	270	-1	ENSMUST00000034060	39252	-1
ENSMUST00000171404	3945	1	ENSMUST00000019932	15314	-1	ENSMUST00000021413	737	-1	ENSMUST00000022701	84656	-1	ENSMUST00000024709	77773	-1	ENSMUST00000026063	16099	-1	ENSMUST00000027741	54492	-1	ENSMUST00000029331	2210	-1	ENSMUST00000030743	11276	-1	ENSMUST00000032264	2726	-1	ENSMUST00000034060	39773	-1
ENSMUST00000171404	4278	1	ENSMUST00000019932	15785	-1	ENSMUST00000021413	941	-1	ENSMUST00000022701	87620	-1	ENSMUST00000024709	79116	-1	ENSMUST00000026063	16442	-1	ENSMUST00000027741	55066	-1	ENSMUST00000029331	2358	-1	ENSMUST00000030743	11783	-1	ENSMUST00000032264	2783	-1	ENSMUST00000034060	39894	-1
ENSMUST00000171404	11494	1	ENSMUST00000019932	1828	-1	ENSMUST00000021413	965	-1	ENSMUST00000022701	8892	-1	ENSMUST00000024709	80305	-1	ENSMUST00000026063	16741	-1	ENSMUST00000027741	58051	-1	ENSMUST00000029331	2403	-1	ENSMUST00000030743	11853	-1	ENSMUST00000032264	2914	-1	ENSMUST00000034060	41630	-1
ENSMUST00000171404	11586	1	ENSMUST00000019932	1916	-1	ENSMUST00000021416	10181	-1	ENSMUST00000022701	9028	-1	ENSMUST00000024709	8032	-1	ENSMUST00000026063	17289	-1	ENSMUST00000027741	58086	-1	ENSMUST00000029331	2655	-1	ENSMUST00000030743	12189	-1	ENSMUST00000032264	2963	-1	ENSMUST00000034060	43728	-1
ENSMUST00000171404	11625	1	ENSMUST00000019932	207	-1	ENSMUST00000021416	10207	-1	ENSMUST00000022701	91366	-1	ENSMUST00000024709	81277	-1	ENSMUST00000026063	17413	-1	ENSMUST00000027741	60852	-1	ENSMUST00000029331	271	-1	ENSMUST00000030743	12909	-1	ENSMUST00000032264	2967	-1	ENSMUST00000034060	44086	-1
ENSMUST00000171404	12333	1	ENSMUST00000019932	2170	-1	ENSMUST00000021416	10456	-1	ENSMUST00000022701	99265	-1	ENSMUST00000024709	82901	-1	ENSMUST00000026063	17715	-1	ENSMUST00000027741	65409	-1	ENSMUST00000029331	285	-1	ENSMUST00000030743	13080	-1	ENSMUST00000032264	3061	-1	ENSMUST00000034060	45705	-1
ENSMUST00000171404	12419	1	ENSMUST00000019932	2252	-1	ENSMUST00000021416	10571	-1	ENSMUST00000022709	1176	-1	ENSMUST00000024709	83101	-1	ENSMUST00000026063	1919	-1	ENSMUST00000027741	6889	-1	ENSMUST00000029331	3130	-1	ENSMUST00000030743	13254	-1	ENSMUST00000032264	3227	-1	ENSMUST00000034060	525	-1
ENSMUST00000171404	12778	1	ENSMUST00000019932	2781	-1	ENSMUST00000021416	11054	-1	ENSMUST00000022709	119	-1	ENSMUST00000024709	8429	-1	ENSMUST00000026063	1941	-1	ENSMUST00000027741	69726	-1	ENSMUST00000029331	3399	-1	ENSMUST00000030743	13291	-1	ENSMUST00000032264	3318	-1	ENSMUST00000034060	56224	-1
ENSMUST00000171404	12808	1	ENSMUST00000019932	2793	-1	ENSMUST00000021416	1132	-1	ENSMUST00000022709	1538	-1	ENSMUST00000024709	8854	-1	ENSMUST00000026063	2632	-1	ENSMUST00000027741	70944	-1	ENSMUST00000029331	3563	-1	ENSMUST00000030743	13367	-1	ENSMUST00000032264	3346	-1	ENSMUST00000034060	58426	-1
ENSMUST00000171404	12859	1	ENSMUST00000019932	3071	-1	ENSMUST00000021416	1140	-1	ENSMUST00000022709	1588	-1	ENSMUST00000024709	9482	-1	ENSMUST00000026063	306	-1	ENSMUST00000027741	71420	-1	ENSMUST00000029331	3724	-1	ENSMUST00000030743	13886	-1	ENSMUST00000032264	3567	-1	ENSMUST00000034060	61270	-1
ENSMUST00000171404	12870	1	ENSMUST00000019932	363	-1	ENSMUST00000021416	11420	-1	ENSMUST00000022709	1803	-1	ENSMUST00000024733	10031	-1	ENSMUST00000026063	3286	-1	ENSMUST00000027741	73676	-1	ENSMUST00000029331	3728	-1	ENSMUST00000030743	14042	-1	ENSMUST00000032264	3712	-1	ENSMUST00000034060	62144	-1
ENSMUST00000171404	13003	1	ENSMUST00000019932	3863	-1	ENSMUST00000021416	11447	-1	ENSMUST00000022709	1913	-1	ENSMUST00000024733	10223	-1	ENSMUST00000026063	3307	-1	ENSMUST00000027741	77154	-1	ENSMUST00000029331	3749	-1	ENSMUST00000030743	14230	-1	ENSMUST00000032264	3889	-1	ENSMUST00000034060	64628	-1
ENSMUST00000171404	4287	1	ENSMUST00000019932	39	-1	ENSMUST00000021416	11800	-1	ENSMUST00000022709	2113	-1	ENSMUST00000024733	10637	-1	ENSMUST00000026063	3440	-1	ENSMUST00000027741	78069	-1	ENSMUST00000029331	3956	-1	ENSMUST00000030743	14493	-1	ENSMUST00000032264	3927	-1	ENSMUST00000034060	67357	-1
ENSMUST00000061578	20714	1	ENSMUST00000019932	4200	-1	ENSMUST00000021416	11928	-1	ENSMUST00000022709	2136	-1	ENSMUST00000024733	10691	-1	ENSMUST00000026063	3485	-1	ENSMUST00000027741	80434	-1	ENSMUST00000029331	4054	-1	ENSMUST00000030743	14873	-1	ENSMUST00000032264	4067	-1	ENSMUST00000034060	70496	-1
ENSMUST00000061578	20746	1	ENSMUST00000019932	4236	-1	ENSMUST00000021416	12098	-1	ENSMUST00000022709	2178	-1	ENSMUST00000024733	10880	-1	ENSMUST00000026063	358	-1	ENSMUST00000027741	81347	-1	ENSMUST00000029331	406	-1	ENSMUST00000030743	15147	-1	ENSMUST00000032264	4080	-1	ENSMUST00000034060	72824	-1
ENSMUST00000061578	22565	1	ENSMUST00000019932	4492	-1	ENSMUST00000021416	12718	-1	ENSMUST00000022709	2309	-1	ENSMUST00000024733	1143	-1	ENSMUST00000026063	3713	-1	ENSMUST00000027741	81521	-1	ENSMUST00000029331	4085	-1	ENSMUST00000030743	1517	-1	ENSMUST00000032264	4087	-1	ENSMUST00000034060	7767	-1
ENSMUST00000061578	23275	1	ENSMUST00000019932	4538	-1	ENSMUST00000021416	12769	-1	ENSMUST00000022709	2374	-1	ENSMUST00000024733	11493	-1	ENSMUST00000026063	4154	-1	ENSMUST00000027741	8195	-1	ENSMUST00000029331	4215	-1	ENSMUST00000030743	15733	-1	ENSMUST00000032264	4191	-1	ENSMUST00000034060	79602	-1
ENSMUST00000061578	54482	1	ENSMUST00000019932	4876	-1	ENSMUST00000021416	12784	-1	ENSMUST00000022709	2430	-1	ENSMUST00000024733	11606	-1	ENSMUST00000026063	4756	-1	ENSMUST00000027741	85905	-1	ENSMUST00000029331	4251	-1	ENSMUST00000030743	15940	-1	ENSMUST00000032264	4245	-1	ENSMUST00000034060	84739	-1
ENSMUST00000061578	54489	1	ENSMUST00000019932	4990	-1	ENSMUST00000021416	12931	-1	ENSMUST00000022709	2533	-1	ENSMUST00000024733	11663	-1	ENSMUST00000026063	4991	-1	ENSMUST00000027741	88194	-1	ENSMUST00000029331	4276	-1	ENSMUST00000030743	16082	-1	ENSMUST00000032264	4393	-1	ENSMUST00000034060	86961	-1
ENSMUST00000061578	54494	1	ENSMUST00000019932	5045	-1	ENSMUST00000021416	12983	-1	ENSMUST00000022709	2579	-1	ENSMUST00000024733	12008	-1	ENSMUST00000026063	4996	-1	ENSMUST00000027741	95310	-1	ENSMUST00000029331	4457	-1	ENSMUST00000030743	16284	-1	ENSMUST00000032264	4442	-1	ENSMUST00000034060	89526	-1
ENSMUST00000061578	54603	1	ENSMUST00000019932	5098	-1	ENSMUST00000021416	13018	-1	ENSMUST00000022709	2632	-1	ENSMUST00000024733	12463	-1	ENSMUST00000026063	5195	-1	ENSMUST00000027741	96364	-1	ENSMUST00000029331	4482	-1	ENSMUST00000030743	16348	-1	ENSMUST00000032264	4474	-1	ENSMUST00000034060	91935	-1
ENSMUST00000061578	54615	1	ENSMUST00000019932	5436	-1	ENSMUST00000021416	13026	-1	ENSMUST00000022709	2638	-1	ENSMUST00000024733	12731	-1	ENSMUST00000026063	556	-1	ENSMUST00000027741	97366	-1	ENSMUST00000029331	4490	-1	ENSMUST00000030743	2608	-1	ENSMUST00000032264	478	-1	ENSMUST00000034074	10130	-1
ENSMUST00000061578	54625	1	ENSMUST00000019932	5531	-1	ENSMUST00000021416	13065	-1	ENSMUST00000022709	2672	-1	ENSMUST00000024733	12774	-1	ENSMUST00000026063	5815	-1	ENSMUST00000027741	97744	-1	ENSMUST00000029331	4517	-1	ENSMUST00000030743	2735	-1	ENSMUST00000032264	4800	-1	ENSMUST00000034074	11003	-1
ENSMUST00000061578	54681	1	ENSMUST00000019932	5646	-1	ENSMUST00000021416	13331	-1	ENSMUST00000022709	2706	-1	ENSMUST00000024733	12896	-1	ENSMUST00000026063	5977	-1	ENSMUST00000027741	98131	-1	ENSMUST00000029331	4556	-1	ENSMUST00000030743	2772	-1	ENSMUST00000032264	5187	-1	ENSMUST00000034074	11276	-1
ENSMUST00000061578	55011	1	ENSMUST00000019932	5756	-1	ENSMUST00000021416	13468	-1	ENSMUST00000022709	2809	-1	ENSMUST00000024733	13558	-1	ENSMUST00000026063	5996	-1	ENSMUST00000027743	10000	-1	ENSMUST00000029331	4575	-1	ENSMUST00000030743	3024	-1	ENSMUST00000032264	5255	-1	ENSMUST00000034074	11453	-1
ENSMUST00000061578	55079	1	ENSMUST00000019932	5790	-1	ENSMUST00000021416	13599	-1	ENSMUST00000022709	3052	-1	ENSMUST00000024733	13636	-1	ENSMUST00000026063	614	-1	ENSMUST00000027743	10344	-1	ENSMUST00000029331	46	-1	ENSMUST00000030743	337	-1	ENSMUST00000032264	5652	-1	ENSMUST00000034074	13524	-1
ENSMUST00000061578	55085	1	ENSMUST00000019932	6230	-1	ENSMUST00000021416	13727	-1	ENSMUST00000022709	3065	-1	ENSMUST00000024733	13761	-1	ENSMUST00000026063	6604	-1	ENSMUST00000027743	10409	-1	ENSMUST00000029331	4672	-1	ENSMUST00000030743	3749	-1	ENSMUST00000032264	5803	-1	ENSMUST00000034074	13861	-1
ENSMUST00000102872	82599	1	ENSMUST00000019932	6249	-1	ENSMUST00000021416	14006	-1	ENSMUST00000022709	3221	-1	ENSMUST00000024733	13771	-1	ENSMUST00000026063	6767	-1	ENSMUST00000027743	10786	-1	ENSMUST00000029331	4707	-1	ENSMUST00000030743	410	-1	ENSMUST00000032264	5955	-1	ENSMUST00000034074	15955	-1
ENSMUST00000102872	82660	1	ENSMUST00000019932	6445	-1	ENSMUST00000021416	14200	-1	ENSMUST00000022709	3261	-1	ENSMUST00000024733	13813	-1	ENSMUST00000026063	6929	-1	ENSMUST00000027743	1133	-1	ENSMUST00000029331	5020	-1	ENSMUST00000030743	4282	-1	ENSMUST00000032264	6070	-1	ENSMUST00000034074	17858	-1
ENSMUST00000102872	119068	1	ENSMUST00000019932	677	-1	ENSMUST00000021416	14532	-1	ENSMUST00000022709	3303	-1	ENSMUST00000024733	1499	-1	ENSMUST00000026063	698	-1	ENSMUST00000027743	11867	-1	ENSMUST00000029331	5027	-1	ENSMUST00000030743	4373	-1	ENSMUST00000032264	6082	-1	ENSMUST00000034074	18174	-1
ENSMUST00000080065	3128	1	ENSMUST00000019932	7432	-1	ENSMUST00000021416	15236	-1	ENSMUST00000022709	338	-1	ENSMUST00000024733	1542	-1	ENSMUST00000026063	7770	-1	ENSMUST00000027743	11895	-1	ENSMUST00000029331	5149	-1	ENSMUST00000030743	4406	-1	ENSMUST00000032264	6103	-1	ENSMUST00000034074	19847	-1
ENSMUST00000113711	223	1	ENSMUST00000019932	7581	-1	ENSMUST00000021416	15902	-1	ENSMUST00000022709	3436	-1	ENSMUST00000024733	1729	-1	ENSMUST00000026063	7782	-1	ENSMUST00000027743	11961	-1	ENSMUST00000029331	5204	-1	ENSMUST00000030743	4636	-1	ENSMUST00000032264	6194	-1	ENSMUST00000034074	21621	-1
ENSMUST00000044556	16087	1	ENSMUST00000019932	783	-1	ENSMUST00000021416	17273	-1	ENSMUST00000022709	3477	-1	ENSMUST00000024733	1737	-1	ENSMUST00000026063	8000	-1	ENSMUST00000027743	12114	-1	ENSMUST00000029331	533	-1	ENSMUST00000030743	4662	-1	ENSMUST00000032264	6517	-1	ENSMUST00000034074	21689	-1
ENSMUST00000044556	18094	1	ENSMUST00000019932	7998	-1	ENSMUST00000021416	17282	-1	ENSMUST00000022709	3608	-1	ENSMUST00000024733	1855	-1	ENSMUST00000026063	8122	-1	ENSMUST00000027743	12141	-1	ENSMUST00000029331	5408	-1	ENSMUST00000030743	4748	-1	ENSMUST00000032264	6629	-1	ENSMUST00000034074	22333	-1
ENSMUST00000044556	18102	1	ENSMUST00000019932	8163	-1	ENSMUST00000021416	17561	-1	ENSMUST00000022709	366	-1	ENSMUST00000024733	2055	-1	ENSMUST00000026063	8191	-1	ENSMUST00000027743	12436	-1	ENSMUST00000029331	5780	-1	ENSMUST00000030743	4901	-1	ENSMUST00000032264	6944	-1	ENSMUST00000034074	23456	-1
ENSMUST00000015481	2070	1	ENSMUST00000019932	8177	-1	ENSMUST00000021416	2247	-1	ENSMUST00000022709	3662	-1	ENSMUST00000024733	2123	-1	ENSMUST00000026063	8505	-1	ENSMUST00000027743	13031	-1	ENSMUST00000029331	5827	-1	ENSMUST00000030743	4996	-1	ENSMUST00000032264	7218	-1	ENSMUST00000034074	24075	-1
ENSMUST00000015481	2491	1	ENSMUST00000019932	8412	-1	ENSMUST00000021416	3082	-1	ENSMUST00000022709	3674	-1	ENSMUST00000024733	2406	-1	ENSMUST00000026063	8668	-1	ENSMUST00000027743	13044	-1	ENSMUST00000029331	6157	-1	ENSMUST00000030743	5207	-1	ENSMUST00000032264	7544	-1	ENSMUST00000034074	24532	-1
ENSMUST00000100219	323	1	ENSMUST00000019932	8489	-1	ENSMUST00000021416	3418	-1	ENSMUST00000022709	3773	-1	ENSMUST00000024733	2600	-1	ENSMUST00000026063	9019	-1	ENSMUST00000027743	13060	-1	ENSMUST00000029331	6173	-1	ENSMUST00000030743	527	-1	ENSMUST00000032264	7713	-1	ENSMUST00000034074	25450	-1
ENSMUST00000100219	335	1	ENSMUST00000019932	8582	-1	ENSMUST00000021416	3583	-1	ENSMUST00000022709	3785	-1	ENSMUST00000024733	2944	-1	ENSMUST00000026072	10230	-1	ENSMUST00000027743	13755	-1	ENSMUST00000029331	786	-1	ENSMUST00000030743	5472	-1	ENSMUST00000032264	7800	-1	ENSMUST00000034074	2596	-1
ENSMUST00000100219	402	1	ENSMUST00000019932	8768	-1	ENSMUST00000021416	364	-1	ENSMUST00000022709	3920	-1	ENSMUST00000024733	3156	-1	ENSMUST00000026072	10711	-1	ENSMUST00000027743	14033	-1	ENSMUST00000029331	937	-1	ENSMUST00000030743	5630	-1	ENSMUST00000032264	7853	-1	ENSMUST00000034074	26724	-1
ENSMUST00000100219	411	1	ENSMUST00000019932	8899	-1	ENSMUST00000021416	4368	-1	ENSMUST00000022709	3929	-1	ENSMUST00000024733	333	-1	ENSMUST00000026072	11570	-1	ENSMUST00000027743	15447	-1	ENSMUST00000029331	994	-1	ENSMUST00000030743	5643	-1	ENSMUST00000032264	7919	-1	ENSMUST00000034074	27261	-1
ENSMUST00000100219	544	1	ENSMUST00000019932	9143	-1	ENSMUST00000021416	442	-1	ENSMUST00000022709	3953	-1	ENSMUST00000024733	3379	-1	ENSMUST00000026072	11962	-1	ENSMUST00000027743	15510	-1	ENSMUST00000029336	1016	-1	ENSMUST00000030743	5662	-1	ENSMUST00000032264	793	-1	ENSMUST00000034074	27851	-1
ENSMUST00000100219	622	1	ENSMUST00000019932	9323	-1	ENSMUST00000021416	5351	-1	ENSMUST00000022709	3998	-1	ENSMUST00000024733	3763	-1	ENSMUST00000026072	12453	-1	ENSMUST00000027743	16399	-1	ENSMUST00000029336	10465	-1	ENSMUST00000030743	5759	-1	ENSMUST00000032264	8029	-1	ENSMUST00000034074	29323	-1
ENSMUST00000100219	1170	1	ENSMUST00000019932	9550	-1	ENSMUST00000021416	5355	-1	ENSMUST00000022709	4108	-1	ENSMUST00000024733	3783	-1	ENSMUST00000026072	12724	-1	ENSMUST00000027743	17394	-1	ENSMUST00000029336	11041	-1	ENSMUST00000030743	6068	-1	ENSMUST00000032264	8038	-1	ENSMUST00000034074	30950	-1
ENSMUST00000100219	390	1	ENSMUST00000019932	9784	-1	ENSMUST00000021416	5431	-1	ENSMUST00000022709	4304	-1	ENSMUST00000024733	4077	-1	ENSMUST00000026072	13021	-1	ENSMUST00000027743	17456	-1	ENSMUST00000029336	11659	-1	ENSMUST00000030743	6400	-1	ENSMUST00000032264	8092	-1	ENSMUST00000034074	32425	-1
ENSMUST00000102855	1721	1	ENSMUST00000019937	11908	-1	ENSMUST00000021416	5982	-1	ENSMUST00000022709	4599	-1	ENSMUST00000024733	4082	-1	ENSMUST00000026072	13219	-1	ENSMUST00000027743	18326	-1	ENSMUST00000029336	12728	-1	ENSMUST00000030743	6597	-1	ENSMUST00000032264	8392	-1	ENSMUST00000034074	33143	-1
ENSMUST00000065134	95	1	ENSMUST00000019937	13606	-1	ENSMUST00000021416	6254	-1	ENSMUST00000022709	532	-1	ENSMUST00000024733	4178	-1	ENSMUST00000026072	13862	-1	ENSMUST00000027743	18920	-1	ENSMUST00000029336	12825	-1	ENSMUST00000030743	6713	-1	ENSMUST00000032264	8533	-1	ENSMUST00000034074	33179	-1
ENSMUST00000065134	141	1	ENSMUST00000019937	13673	-1	ENSMUST00000021416	6459	-1	ENSMUST00000022709	692	-1	ENSMUST00000024733	4514	-1	ENSMUST00000026072	15046	-1	ENSMUST00000027743	19522	-1	ENSMUST00000029336	14173	-1	ENSMUST00000030743	7161	-1	ENSMUST00000032264	8618	-1	ENSMUST00000034074	34691	-1
ENSMUST00000065134	167	1	ENSMUST00000019937	14383	-1	ENSMUST00000021416	6627	-1	ENSMUST00000022709	756	-1	ENSMUST00000024733	4675	-1	ENSMUST00000026072	15133	-1	ENSMUST00000027743	20220	-1	ENSMUST00000029336	14426	-1	ENSMUST00000030743	7347	-1	ENSMUST00000032264	8950	-1	ENSMUST00000034074	35192	-1
ENSMUST00000065134	241	1	ENSMUST00000019937	14731	-1	ENSMUST00000021416	6642	-1	ENSMUST00000022709	896	-1	ENSMUST00000024733	515	-1	ENSMUST00000026072	15228	-1	ENSMUST00000027743	20786	-1	ENSMUST00000029336	15282	-1	ENSMUST00000030743	7527	-1	ENSMUST00000032264	979	-1	ENSMUST00000034074	35575	-1
ENSMUST00000041830	14995	1	ENSMUST00000019937	15505	-1	ENSMUST00000021416	6663	-1	ENSMUST00000022709	908	-1	ENSMUST00000024733	5621	-1	ENSMUST00000026072	15823	-1	ENSMUST00000027743	21190	-1	ENSMUST00000029336	15671	-1	ENSMUST00000030743	7680	-1	ENSMUST00000032269	1049	-1	ENSMUST00000034074	36730	-1
ENSMUST00000041830	15016	1	ENSMUST00000019937	15856	-1	ENSMUST00000021416	7129	-1	ENSMUST00000022716	10888	-1	ENSMUST00000024733	6048	-1	ENSMUST00000026072	16815	-1	ENSMUST00000027743	22194	-1	ENSMUST00000029336	15767	-1	ENSMUST00000030743	7763	-1	ENSMUST00000032269	10626	-1	ENSMUST00000034074	37377	-1
ENSMUST00000041726	297	1	ENSMUST00000019937	16598	-1	ENSMUST00000021416	8002	-1	ENSMUST00000022716	11620	-1	ENSMUST00000024733	6483	-1	ENSMUST00000026072	17162	-1	ENSMUST00000027743	22271	-1	ENSMUST00000029336	16237	-1	ENSMUST00000030743	7785	-1	ENSMUST00000032269	10721	-1	ENSMUST00000034074	37583	-1
ENSMUST00000041726	754	1	ENSMUST00000019937	17383	-1	ENSMUST00000021416	8030	-1	ENSMUST00000022716	13177	-1	ENSMUST00000024733	6780	-1	ENSMUST00000026072	1761	-1	ENSMUST00000027743	22702	-1	ENSMUST00000029336	1631	-1	ENSMUST00000030743	8170	-1	ENSMUST00000032269	11415	-1	ENSMUST00000034074	38036	-1
ENSMUST00000041726	843	1	ENSMUST00000019937	18531	-1	ENSMUST00000021416	8465	-1	ENSMUST00000022716	1333	-1	ENSMUST00000024733	7065	-1	ENSMUST00000026072	18060	-1	ENSMUST00000027743	25340	-1	ENSMUST00000029336	16992	-1	ENSMUST00000030743	9473	-1	ENSMUST00000032269	11482	-1	ENSMUST00000034074	38337	-1
ENSMUST00000041726	1057	1	ENSMUST00000019937	19266	-1	ENSMUST00000021416	8782	-1	ENSMUST00000022716	13343	-1	ENSMUST00000024733	7221	-1	ENSMUST00000026072	19067	-1	ENSMUST00000027743	25702	-1	ENSMUST00000029336	1792	-1	ENSMUST00000030743	9793	-1	ENSMUST00000032269	11818	-1	ENSMUST00000034074	38600	-1
ENSMUST00000102852	3107	1	ENSMUST00000019937	19782	-1	ENSMUST00000021416	8797	-1	ENSMUST00000022716	13854	-1	ENSMUST00000024733	7407	-1	ENSMUST00000026072	1936	-1	ENSMUST00000027743	25786	-1	ENSMUST00000029336	18912	-1	ENSMUST00000030743	9851	-1	ENSMUST00000032269	12262	-1	ENSMUST00000034074	38941	-1
ENSMUST00000073879	769	1	ENSMUST00000019937	21943	-1	ENSMUST00000021416	8952	-1	ENSMUST00000022716	14519	-1	ENSMUST00000024733	7479	-1	ENSMUST00000026072	20036	-1	ENSMUST00000027743	26093	-1	ENSMUST00000029336	19098	-1	ENSMUST00000030743	9858	-1	ENSMUST00000032269	12869	-1	ENSMUST00000034074	40141	-1
ENSMUST00000073879	957	1	ENSMUST00000019937	22247	-1	ENSMUST00000021416	9620	-1	ENSMUST00000022716	1475	-1	ENSMUST00000024733	8048	-1	ENSMUST00000026072	20160	-1	ENSMUST00000027743	2615	-1	ENSMUST00000029336	19276	-1	ENSMUST00000030747	10063	-1	ENSMUST00000032269	13154	-1	ENSMUST00000034074	40333	-1
ENSMUST00000056433	62226	1	ENSMUST00000019937	26054	-1	ENSMUST00000021416	9734	-1	ENSMUST00000022716	15519	-1	ENSMUST00000024733	8865	-1	ENSMUST00000026072	21672	-1	ENSMUST00000027743	26200	-1	ENSMUST00000029336	19635	-1	ENSMUST00000030747	10170	-1	ENSMUST00000032269	13525	-1	ENSMUST00000034074	40623	-1
ENSMUST00000056433	62669	1	ENSMUST00000019937	26332	-1	ENSMUST00000021416	9806	-1	ENSMUST00000022716	15528	-1	ENSMUST00000024733	8962	-1	ENSMUST00000026072	22321	-1	ENSMUST00000027743	26258	-1	ENSMUST00000029336	19798	-1	ENSMUST00000030747	10489	-1	ENSMUST00000032269	1446	-1	ENSMUST00000034074	42278	-1
ENSMUST00000056433	62704	1	ENSMUST00000019937	28328	-1	ENSMUST00000021424	10268	-1	ENSMUST00000022716	15623	-1	ENSMUST00000024733	9198	-1	ENSMUST00000026072	22452	-1	ENSMUST00000027743	27634	-1	ENSMUST00000029336	19812	-1	ENSMUST00000030747	10669	-1	ENSMUST00000032269	15071	-1	ENSMUST00000034074	43561	-1
ENSMUST00000056433	62860	1	ENSMUST00000019937	28375	-1	ENSMUST00000021424	10879	-1	ENSMUST00000022716	16703	-1	ENSMUST00000024733	9358	-1	ENSMUST00000026072	23485	-1	ENSMUST00000027743	29154	-1	ENSMUST00000029336	20422	-1	ENSMUST00000030747	11139	-1	ENSMUST00000032269	15317	-1	ENSMUST00000034074	4580	-1
ENSMUST00000056433	62908	1	ENSMUST00000019937	28502	-1	ENSMUST00000021424	11286	-1	ENSMUST00000022716	17871	-1	ENSMUST00000024733	942	-1	ENSMUST00000026072	23617	-1	ENSMUST00000027743	31252	-1	ENSMUST00000029336	21137	-1	ENSMUST00000030747	11218	-1	ENSMUST00000032269	15611	-1	ENSMUST00000034074	4609	-1
ENSMUST00000000199	44	1	ENSMUST00000019937	2923	-1	ENSMUST00000021424	11989	-1	ENSMUST00000022716	18155	-1	ENSMUST00000024733	963	-1	ENSMUST00000026072	24359	-1	ENSMUST00000027743	31926	-1	ENSMUST00000029336	23895	-1	ENSMUST00000030747	11409	-1	ENSMUST00000032269	15705	-1	ENSMUST00000034074	5151	-1
ENSMUST00000000199	46791	1	ENSMUST00000019937	29902	-1	ENSMUST00000021424	12786	-1	ENSMUST00000022716	1828	-1	ENSMUST00000024733	9799	-1	ENSMUST00000026072	24919	-1	ENSMUST00000027743	33253	-1	ENSMUST00000029336	24082	-1	ENSMUST00000030747	11636	-1	ENSMUST00000032269	15787	-1	ENSMUST00000034074	5535	-1
ENSMUST00000000199	46810	1	ENSMUST00000019937	2993	-1	ENSMUST00000021424	15922	-1	ENSMUST00000022716	18381	-1	ENSMUST00000024733	9952	-1	ENSMUST00000026072	25187	-1	ENSMUST00000027743	36027	-1	ENSMUST00000029336	24182	-1	ENSMUST00000030747	11671	-1	ENSMUST00000032269	16013	-1	ENSMUST00000034074	5859	-1
ENSMUST00000102840	45009	1	ENSMUST00000019937	29966	-1	ENSMUST00000021424	17002	-1	ENSMUST00000022716	18495	-1	ENSMUST00000024734	10132	-1	ENSMUST00000026072	25202	-1	ENSMUST00000027743	36214	-1	ENSMUST00000029336	24426	-1	ENSMUST00000030747	11676	-1	ENSMUST00000032269	16937	-1	ENSMUST00000034074	6850	-1
ENSMUST00000028190	40495	1	ENSMUST00000019937	30266	-1	ENSMUST00000021424	17532	-1	ENSMUST00000022716	18735	-1	ENSMUST00000024734	10248	-1	ENSMUST00000026072	26191	-1	ENSMUST00000027743	36431	-1	ENSMUST00000029336	2454	-1	ENSMUST00000030747	13891	-1	ENSMUST00000032269	1755	-1	ENSMUST00000034074	7254	-1
ENSMUST00000028190	40505	1	ENSMUST00000019937	32940	-1	ENSMUST00000021424	17797	-1	ENSMUST00000022716	2057	-1	ENSMUST00000024734	10707	-1	ENSMUST00000026072	27073	-1	ENSMUST00000027743	36739	-1	ENSMUST00000029336	24987	-1	ENSMUST00000030747	14459	-1	ENSMUST00000032269	17775	-1	ENSMUST00000034074	7501	-1
ENSMUST00000028190	41115	1	ENSMUST00000019937	33897	-1	ENSMUST00000021424	19419	-1	ENSMUST00000022716	20616	-1	ENSMUST00000024734	10950	-1	ENSMUST00000026072	27715	-1	ENSMUST00000027743	38036	-1	ENSMUST00000029336	25595	-1	ENSMUST00000030747	14569	-1	ENSMUST00000032269	18017	-1	ENSMUST00000034074	8179	-1
ENSMUST00000028190	41352	1	ENSMUST00000019937	36623	-1	ENSMUST00000021424	21171	-1	ENSMUST00000022716	2142	-1	ENSMUST00000024734	11537	-1	ENSMUST00000026072	27841	-1	ENSMUST00000027743	38182	-1	ENSMUST00000029336	25877	-1	ENSMUST00000030747	14613	-1	ENSMUST00000032269	18125	-1	ENSMUST00000034074	8459	-1
ENSMUST00000028190	42025	1	ENSMUST00000019937	36826	-1	ENSMUST00000021424	22035	-1	ENSMUST00000022716	22090	-1	ENSMUST00000024734	11984	-1	ENSMUST00000026072	2801	-1	ENSMUST00000027743	39193	-1	ENSMUST00000029336	26498	-1	ENSMUST00000030747	14668	-1	ENSMUST00000032269	18140	-1	ENSMUST00000034074	8774	-1
ENSMUST00000028190	42032	1	ENSMUST00000019937	38587	-1	ENSMUST00000021424	22335	-1	ENSMUST00000022716	22138	-1	ENSMUST00000024734	12083	-1	ENSMUST00000026072	28303	-1	ENSMUST00000027743	43431	-1	ENSMUST00000029336	26984	-1	ENSMUST00000030747	14955	-1	ENSMUST00000032269	18214	-1	ENSMUST00000034074	9585	-1
ENSMUST00000028190	42860	1	ENSMUST00000019937	38924	-1	ENSMUST00000021424	2369	-1	ENSMUST00000022716	22594	-1	ENSMUST00000024734	1382	-1	ENSMUST00000026072	29874	-1	ENSMUST00000027743	4377	-1	ENSMUST00000029336	27123	-1	ENSMUST00000030747	15024	-1	ENSMUST00000032269	18475	-1	ENSMUST00000034074	969	-1
ENSMUST00000028188	1832	1	ENSMUST00000019937	39283	-1	ENSMUST00000021424	29354	-1	ENSMUST00000022716	22826	-1	ENSMUST00000024734	1404	-1	ENSMUST00000026072	29885	-1	ENSMUST00000027743	4385	-1	ENSMUST00000029336	28383	-1	ENSMUST00000030747	15062	-1	ENSMUST00000032269	18652	-1	ENSMUST00000034074	9847	-1
ENSMUST00000028188	1955	1	ENSMUST00000019937	41608	-1	ENSMUST00000021424	30757	-1	ENSMUST00000022716	23454	-1	ENSMUST00000024734	1622	-1	ENSMUST00000026072	30445	-1	ENSMUST00000027743	4431	-1	ENSMUST00000029336	28412	-1	ENSMUST00000030747	16007	-1	ENSMUST00000032269	1868	-1	ENSMUST00000034076	1113	-1
ENSMUST00000028188	2027	1	ENSMUST00000019937	44202	-1	ENSMUST00000021424	33176	-1	ENSMUST00000022716	23580	-1	ENSMUST00000024734	1649	-1	ENSMUST00000026072	31822	-1	ENSMUST00000027743	4596	-1	ENSMUST00000029336	29148	-1	ENSMUST00000030747	16927	-1	ENSMUST00000032269	19643	-1	ENSMUST00000034076	1138	-1
ENSMUST00000028188	2351	1	ENSMUST00000019937	47688	-1	ENSMUST00000021424	3626	-1	ENSMUST00000022716	24545	-1	ENSMUST00000024734	1694	-1	ENSMUST00000026072	32240	-1	ENSMUST00000027743	5069	-1	ENSMUST00000029336	29155	-1	ENSMUST00000030747	17128	-1	ENSMUST00000032269	19821	-1	ENSMUST00000034076	1173	-1
ENSMUST00000065398	60179	1	ENSMUST00000019937	48034	-1	ENSMUST00000021424	36554	-1	ENSMUST00000022716	24688	-1	ENSMUST00000024734	1956	-1	ENSMUST00000026072	32963	-1	ENSMUST00000027743	5764	-1	ENSMUST00000029336	29854	-1	ENSMUST00000030747	17753	-1	ENSMUST00000032269	19935	-1	ENSMUST00000034076	118	-1
ENSMUST00000065398	60183	1	ENSMUST00000019937	48167	-1	ENSMUST00000021424	38527	-1	ENSMUST00000022716	2516	-1	ENSMUST00000024734	2078	-1	ENSMUST00000026072	3304	-1	ENSMUST00000027743	5906	-1	ENSMUST00000029336	31094	-1	ENSMUST00000030747	17766	-1	ENSMUST00000032269	2674	-1	ENSMUST00000034076	1182	-1
ENSMUST00000065398	60374	1	ENSMUST00000019937	48438	-1	ENSMUST00000021424	40776	-1	ENSMUST00000022716	25528	-1	ENSMUST00000024734	2487	-1	ENSMUST00000026072	33524	-1	ENSMUST00000027743	6021	-1	ENSMUST00000029336	31195	-1	ENSMUST00000030747	1841	-1	ENSMUST00000032269	3100	-1	ENSMUST00000034076	1347	-1
ENSMUST00000065398	77792	1	ENSMUST00000019937	48594	-1	ENSMUST00000021424	4196	-1	ENSMUST00000022716	26210	-1	ENSMUST00000024734	2717	-1	ENSMUST00000026072	33595	-1	ENSMUST00000027743	7015	-1	ENSMUST00000029336	3168	-1	ENSMUST00000030747	1848	-1	ENSMUST00000032269	318	-1	ENSMUST00000034076	1387	-1
ENSMUST00000065398	77936	1	ENSMUST00000019937	48963	-1	ENSMUST00000021424	43548	-1	ENSMUST00000022716	26524	-1	ENSMUST00000024734	272	-1	ENSMUST00000026072	34198	-1	ENSMUST00000027743	7546	-1	ENSMUST00000029336	32090	-1	ENSMUST00000030747	18894	-1	ENSMUST00000032269	3200	-1	ENSMUST00000034076	1419	-1
ENSMUST00000069817	30551	1	ENSMUST00000019937	51008	-1	ENSMUST00000021424	44398	-1	ENSMUST00000022716	26766	-1	ENSMUST00000024734	2882	-1	ENSMUST00000026072	35196	-1	ENSMUST00000027743	8487	-1	ENSMUST00000029336	3213	-1	ENSMUST00000030747	19050	-1	ENSMUST00000032269	3528	-1	ENSMUST00000034076	1571	-1
ENSMUST00000069817	30862	1	ENSMUST00000019937	51889	-1	ENSMUST00000021424	46902	-1	ENSMUST00000022716	2681	-1	ENSMUST00000024734	2978	-1	ENSMUST00000026072	4043	-1	ENSMUST00000027743	9115	-1	ENSMUST00000029336	32231	-1	ENSMUST00000030747	19257	-1	ENSMUST00000032269	355	-1	ENSMUST00000034076	1617	-1
ENSMUST00000069817	31595	1	ENSMUST00000019937	52872	-1	ENSMUST00000021424	48242	-1	ENSMUST00000022716	26870	-1	ENSMUST00000024734	3114	-1	ENSMUST00000026072	4055	-1	ENSMUST00000027743	9374	-1	ENSMUST00000029336	32712	-1	ENSMUST00000030747	19604	-1	ENSMUST00000032269	3848	-1	ENSMUST00000034076	1666	-1
ENSMUST00000069817	31613	1	ENSMUST00000019937	53137	-1	ENSMUST00000021424	49670	-1	ENSMUST00000022716	28160	-1	ENSMUST00000024734	3556	-1	ENSMUST00000026072	4847	-1	ENSMUST00000027748	1037	-1	ENSMUST00000029336	33996	-1	ENSMUST00000030747	20326	-1	ENSMUST00000032269	4430	-1	ENSMUST00000034076	1714	-1
ENSMUST00000069817	31628	1	ENSMUST00000019937	53326	-1	ENSMUST00000021424	50296	-1	ENSMUST00000022716	30741	-1	ENSMUST00000024734	3569	-1	ENSMUST00000026072	5985	-1	ENSMUST00000027748	1083	-1	ENSMUST00000029336	34476	-1	ENSMUST00000030747	20788	-1	ENSMUST00000032269	4494	-1	ENSMUST00000034076	1747	-1
ENSMUST00000069817	31633	1	ENSMUST00000019937	55421	-1	ENSMUST00000021424	5317	-1	ENSMUST00000022716	30909	-1	ENSMUST00000024734	3585	-1	ENSMUST00000026072	676	-1	ENSMUST00000027748	1175	-1	ENSMUST00000029336	35812	-1	ENSMUST00000030747	21031	-1	ENSMUST00000032269	5132	-1	ENSMUST00000034076	1856	-1
ENSMUST00000069817	31847	1	ENSMUST00000019937	55932	-1	ENSMUST00000021424	55946	-1	ENSMUST00000022716	31183	-1	ENSMUST00000024734	3679	-1	ENSMUST00000026072	6824	-1	ENSMUST00000027748	1185	-1	ENSMUST00000029336	36658	-1	ENSMUST00000030747	21338	-1	ENSMUST00000032269	552	-1	ENSMUST00000034076	1931	-1
ENSMUST00000069817	48341	1	ENSMUST00000019937	56406	-1	ENSMUST00000021424	56015	-1	ENSMUST00000022716	31316	-1	ENSMUST00000024734	4705	-1	ENSMUST00000026072	7064	-1	ENSMUST00000027748	1325	-1	ENSMUST00000029336	4176	-1	ENSMUST00000030747	21405	-1	ENSMUST00000032269	5801	-1	ENSMUST00000034076	1946	-1
ENSMUST00000069817	48389	1	ENSMUST00000019937	5643	-1	ENSMUST00000021424	56535	-1	ENSMUST00000022716	33000	-1	ENSMUST00000024734	4715	-1	ENSMUST00000026072	7083	-1	ENSMUST00000027748	1343	-1	ENSMUST00000029336	4246	-1	ENSMUST00000030747	21504	-1	ENSMUST00000032269	6161	-1	ENSMUST00000034076	1968	-1
ENSMUST00000069817	48453	1	ENSMUST00000019937	56941	-1	ENSMUST00000021424	60552	-1	ENSMUST00000022716	33464	-1	ENSMUST00000024734	4946	-1	ENSMUST00000026072	7181	-1	ENSMUST00000027748	1415	-1	ENSMUST00000029336	4377	-1	ENSMUST00000030747	21800	-1	ENSMUST00000032269	6466	-1	ENSMUST00000034076	210	-1
ENSMUST00000100194	18372	1	ENSMUST00000019937	5788	-1	ENSMUST00000021424	6093	-1	ENSMUST00000022716	34819	-1	ENSMUST00000024734	5026	-1	ENSMUST00000026072	8913	-1	ENSMUST00000027748	1587	-1	ENSMUST00000029336	5990	-1	ENSMUST00000030747	22018	-1	ENSMUST00000032269	6984	-1	ENSMUST00000034076	2208	-1
ENSMUST00000100194	18343	1	ENSMUST00000019937	59757	-1	ENSMUST00000021424	61217	-1	ENSMUST00000022716	35915	-1	ENSMUST00000024734	5154	-1	ENSMUST00000026072	9130	-1	ENSMUST00000027748	1666	-1	ENSMUST00000029336	6599	-1	ENSMUST00000030747	2337	-1	ENSMUST00000032269	7109	-1	ENSMUST00000034076	2298	-1
ENSMUST00000113352	1792	1	ENSMUST00000019937	61177	-1	ENSMUST00000021424	64904	-1	ENSMUST00000022716	36641	-1	ENSMUST00000024734	5183	-1	ENSMUST00000026072	9285	-1	ENSMUST00000027748	2052	-1	ENSMUST00000029336	7675	-1	ENSMUST00000030747	2394	-1	ENSMUST00000032269	7775	-1	ENSMUST00000034076	2356	-1
ENSMUST00000028162	6429	1	ENSMUST00000019937	61344	-1	ENSMUST00000021424	66326	-1	ENSMUST00000022716	37255	-1	ENSMUST00000024734	5238	-1	ENSMUST00000026072	9334	-1	ENSMUST00000027748	2062	-1	ENSMUST00000029336	7957	-1	ENSMUST00000030747	2434	-1	ENSMUST00000032269	7992	-1	ENSMUST00000034076	2451	-1
ENSMUST00000028162	6540	1	ENSMUST00000019937	61807	-1	ENSMUST00000021424	66342	-1	ENSMUST00000022716	37768	-1	ENSMUST00000024734	5634	-1	ENSMUST00000026072	9672	-1	ENSMUST00000027748	2068	-1	ENSMUST00000029336	8438	-1	ENSMUST00000030747	2598	-1	ENSMUST00000032269	8131	-1	ENSMUST00000034076	2836	-1
ENSMUST00000052119	781	1	ENSMUST00000019937	62809	-1	ENSMUST00000021424	6693	-1	ENSMUST00000022716	40236	-1	ENSMUST00000024734	5782	-1	ENSMUST00000026076	103627	-1	ENSMUST00000027748	2091	-1	ENSMUST00000029336	8683	-1	ENSMUST00000030747	2684	-1	ENSMUST00000032269	8182	-1	ENSMUST00000034076	2891	-1
ENSMUST00000052119	988	1	ENSMUST00000019937	64775	-1	ENSMUST00000021424	68244	-1	ENSMUST00000022716	42275	-1	ENSMUST00000024734	586	-1	ENSMUST00000026076	109877	-1	ENSMUST00000027748	21	-1	ENSMUST00000029336	8989	-1	ENSMUST00000030747	2709	-1	ENSMUST00000032269	8570	-1	ENSMUST00000034076	2916	-1
ENSMUST00000048431	5076	1	ENSMUST00000019937	67539	-1	ENSMUST00000021424	68658	-1	ENSMUST00000022716	42327	-1	ENSMUST00000024734	6091	-1	ENSMUST00000026076	110236	-1	ENSMUST00000027748	2113	-1	ENSMUST00000029336	9729	-1	ENSMUST00000030747	2820	-1	ENSMUST00000032269	8927	-1	ENSMUST00000034076	3125	-1
ENSMUST00000048431	5105	1	ENSMUST00000019937	6994	-1	ENSMUST00000021424	69904	-1	ENSMUST00000022716	42618	-1	ENSMUST00000024734	6147	-1	ENSMUST00000026076	111258	-1	ENSMUST00000027748	2140	-1	ENSMUST00000029336	9808	-1	ENSMUST00000030747	2881	-1	ENSMUST00000032269	9100	-1	ENSMUST00000034076	3200	-1
ENSMUST00000140592	2585	1	ENSMUST00000019937	8520	-1	ENSMUST00000021424	70345	-1	ENSMUST00000022716	42730	-1	ENSMUST00000024734	6200	-1	ENSMUST00000026076	111803	-1	ENSMUST00000027748	2355	-1	ENSMUST00000029355	108044	-1	ENSMUST00000030747	3104	-1	ENSMUST00000032269	9322	-1	ENSMUST00000034076	3389	-1
ENSMUST00000140592	2615	1	ENSMUST00000019937	8847	-1	ENSMUST00000021424	71360	-1	ENSMUST00000022716	43188	-1	ENSMUST00000024734	6378	-1	ENSMUST00000026076	114247	-1	ENSMUST00000027748	2448	-1	ENSMUST00000029355	110266	-1	ENSMUST00000030747	3178	-1	ENSMUST00000032269	9354	-1	ENSMUST00000034076	3410	-1
ENSMUST00000165374	933	1	ENSMUST00000019938	10083	-1	ENSMUST00000021424	71838	-1	ENSMUST00000022716	44612	-1	ENSMUST00000024734	6701	-1	ENSMUST00000026076	115906	-1	ENSMUST00000027748	2514	-1	ENSMUST00000029355	110327	-1	ENSMUST00000030747	3923	-1	ENSMUST00000032269	9389	-1	ENSMUST00000034076	3574	-1
ENSMUST00000165374	954	1	ENSMUST00000019938	10095	-1	ENSMUST00000021424	71973	-1	ENSMUST00000022716	45031	-1	ENSMUST00000024734	6934	-1	ENSMUST00000026076	119118	-1	ENSMUST00000027748	2641	-1	ENSMUST00000029355	111964	-1	ENSMUST00000030747	4163	-1	ENSMUST00000032269	9393	-1	ENSMUST00000034076	3617	-1
ENSMUST00000102818	10125	1	ENSMUST00000019938	10151	-1	ENSMUST00000021424	72773	-1	ENSMUST00000022716	4938	-1	ENSMUST00000024734	7228	-1	ENSMUST00000026076	120647	-1	ENSMUST00000027748	2647	-1	ENSMUST00000029355	125517	-1	ENSMUST00000030747	4225	-1	ENSMUST00000032269	9591	-1	ENSMUST00000034076	3621	-1
ENSMUST00000102818	10192	1	ENSMUST00000019938	11378	-1	ENSMUST00000021424	73211	-1	ENSMUST00000022716	7483	-1	ENSMUST00000024734	7949	-1	ENSMUST00000026076	132111	-1	ENSMUST00000027748	2709	-1	ENSMUST00000029355	128354	-1	ENSMUST00000030747	4376	-1	ENSMUST00000032272	10570	-1	ENSMUST00000034076	3635	-1
ENSMUST00000102818	10565	1	ENSMUST00000019938	11419	-1	ENSMUST00000021424	74658	-1	ENSMUST00000022716	9645	-1	ENSMUST00000024734	8556	-1	ENSMUST00000026076	135144	-1	ENSMUST00000027748	2776	-1	ENSMUST00000029355	137949	-1	ENSMUST00000030747	5819	-1	ENSMUST00000032272	10643	-1	ENSMUST00000034076	3660	-1
ENSMUST00000102818	10813	1	ENSMUST00000019938	12747	-1	ENSMUST00000021424	75342	-1	ENSMUST00000022716	9658	-1	ENSMUST00000024734	8591	-1	ENSMUST00000026076	139276	-1	ENSMUST00000027748	2833	-1	ENSMUST00000029355	145864	-1	ENSMUST00000030747	7041	-1	ENSMUST00000032272	10813	-1	ENSMUST00000034076	3700	-1
ENSMUST00000102818	10829	1	ENSMUST00000019938	12860	-1	ENSMUST00000021424	76385	-1	ENSMUST00000022716	9790	-1	ENSMUST00000024734	8604	-1	ENSMUST00000026076	141071	-1	ENSMUST00000027748	2963	-1	ENSMUST00000029355	147589	-1	ENSMUST00000030747	7194	-1	ENSMUST00000032272	11655	-1	ENSMUST00000034076	403	-1
ENSMUST00000102818	10966	1	ENSMUST00000019938	13185	-1	ENSMUST00000021424	76664	-1	ENSMUST00000022716	9864	-1	ENSMUST00000024734	9010	-1	ENSMUST00000026076	150490	-1	ENSMUST00000027748	302	-1	ENSMUST00000029355	148876	-1	ENSMUST00000030747	7279	-1	ENSMUST00000032272	12582	-1	ENSMUST00000034076	442	-1
ENSMUST00000102818	10974	1	ENSMUST00000019938	13343	-1	ENSMUST00000021424	7830	-1	ENSMUST00000022720	10008	-1	ENSMUST00000024734	9020	-1	ENSMUST00000026076	152211	-1	ENSMUST00000027748	3290	-1	ENSMUST00000029355	151454	-1	ENSMUST00000030747	7511	-1	ENSMUST00000032272	12688	-1	ENSMUST00000034076	761	-1
ENSMUST00000167841	35361	1	ENSMUST00000019938	13425	-1	ENSMUST00000021424	78305	-1	ENSMUST00000022720	10033	-1	ENSMUST00000024734	9266	-1	ENSMUST00000026076	15405	-1	ENSMUST00000027748	3312	-1	ENSMUST00000029355	159129	-1	ENSMUST00000030747	7623	-1	ENSMUST00000032272	13170	-1	ENSMUST00000034076	818	-1
ENSMUST00000167841	35297	1	ENSMUST00000019938	1358	-1	ENSMUST00000021424	78451	-1	ENSMUST00000022720	10057	-1	ENSMUST00000024734	9600	-1	ENSMUST00000026076	156680	-1	ENSMUST00000027748	352	-1	ENSMUST00000029355	172007	-1	ENSMUST00000030747	8056	-1	ENSMUST00000032272	13659	-1	ENSMUST00000034076	878	-1
ENSMUST00000113242	21655	1	ENSMUST00000019938	14096	-1	ENSMUST00000021424	79776	-1	ENSMUST00000022720	10919	-1	ENSMUST00000024734	9873	-1	ENSMUST00000026076	156962	-1	ENSMUST00000027748	3705	-1	ENSMUST00000029355	17552	-1	ENSMUST00000030747	9769	-1	ENSMUST00000032272	14290	-1	ENSMUST00000034076	906	-1
ENSMUST00000113242	26925	1	ENSMUST00000019938	14320	-1	ENSMUST00000021424	80204	-1	ENSMUST00000022720	11102	-1	ENSMUST00000024734	9918	-1	ENSMUST00000026076	15846	-1	ENSMUST00000027748	3843	-1	ENSMUST00000029355	17579	-1	ENSMUST00000030751	10867	-1	ENSMUST00000032272	14598	-1	ENSMUST00000034076	910	-1
ENSMUST00000100180	12140	1	ENSMUST00000019938	14963	-1	ENSMUST00000021424	9072	-1	ENSMUST00000022720	11423	-1	ENSMUST00000024748	1240	-1	ENSMUST00000026076	167850	-1	ENSMUST00000027748	3917	-1	ENSMUST00000029355	175957	-1	ENSMUST00000030751	10919	-1	ENSMUST00000032272	14662	-1	ENSMUST00000034076	93	-1
ENSMUST00000028135	47795	1	ENSMUST00000019938	15283	-1	ENSMUST00000021425	1072	-1	ENSMUST00000022720	11508	-1	ENSMUST00000024748	1606	-1	ENSMUST00000026076	168948	-1	ENSMUST00000027748	3947	-1	ENSMUST00000029355	179723	-1	ENSMUST00000030751	11016	-1	ENSMUST00000032272	16037	-1	ENSMUST00000034079	10047	-1
ENSMUST00000028135	47827	1	ENSMUST00000019938	15360	-1	ENSMUST00000021425	119	-1	ENSMUST00000022720	11532	-1	ENSMUST00000024748	1666	-1	ENSMUST00000026076	169031	-1	ENSMUST00000027748	3979	-1	ENSMUST00000029355	180803	-1	ENSMUST00000030751	12099	-1	ENSMUST00000032272	16233	-1	ENSMUST00000034079	10122	-1
ENSMUST00000113165	2016	1	ENSMUST00000019938	15430	-1	ENSMUST00000021425	1208	-1	ENSMUST00000022720	11762	-1	ENSMUST00000024748	1968	-1	ENSMUST00000026076	171930	-1	ENSMUST00000027748	4097	-1	ENSMUST00000029355	181310	-1	ENSMUST00000030751	12331	-1	ENSMUST00000032272	1751	-1	ENSMUST00000034079	10874	-1
ENSMUST00000113165	2042	1	ENSMUST00000019938	16597	-1	ENSMUST00000021425	1332	-1	ENSMUST00000022720	12049	-1	ENSMUST00000024748	2121	-1	ENSMUST00000026076	172093	-1	ENSMUST00000027748	4406	-1	ENSMUST00000029355	183028	-1	ENSMUST00000030751	13118	-1	ENSMUST00000032272	17690	-1	ENSMUST00000034079	12372	-1
ENSMUST00000113165	2736	1	ENSMUST00000019938	17003	-1	ENSMUST00000021425	1376	-1	ENSMUST00000022720	12984	-1	ENSMUST00000024748	2216	-1	ENSMUST00000026076	172234	-1	ENSMUST00000027748	4511	-1	ENSMUST00000029355	188055	-1	ENSMUST00000030751	13264	-1	ENSMUST00000032272	20382	-1	ENSMUST00000034079	12894	-1
ENSMUST00000113165	2775	1	ENSMUST00000019938	17226	-1	ENSMUST00000021425	1453	-1	ENSMUST00000022720	13169	-1	ENSMUST00000024748	2430	-1	ENSMUST00000026076	174946	-1	ENSMUST00000027748	4553	-1	ENSMUST00000029355	188964	-1	ENSMUST00000030751	14567	-1	ENSMUST00000032272	2067	-1	ENSMUST00000034079	1302	-1
ENSMUST00000113165	3853	1	ENSMUST00000019938	17318	-1	ENSMUST00000021425	1504	-1	ENSMUST00000022720	14545	-1	ENSMUST00000024748	2717	-1	ENSMUST00000026076	17750	-1	ENSMUST00000027748	4681	-1	ENSMUST00000029355	192094	-1	ENSMUST00000030751	14918	-1	ENSMUST00000032272	20684	-1	ENSMUST00000034079	13814	-1
ENSMUST00000113165	3865	1	ENSMUST00000019938	17407	-1	ENSMUST00000021425	1514	-1	ENSMUST00000022720	15149	-1	ENSMUST00000024748	2961	-1	ENSMUST00000026076	185049	-1	ENSMUST00000027748	4700	-1	ENSMUST00000029355	194133	-1	ENSMUST00000030751	1562	-1	ENSMUST00000032272	20725	-1	ENSMUST00000034079	14944	-1
ENSMUST00000113165	4144	1	ENSMUST00000019938	17439	-1	ENSMUST00000021425	1587	-1	ENSMUST00000022720	15490	-1	ENSMUST00000024748	3119	-1	ENSMUST00000026076	185104	-1	ENSMUST00000027748	480	-1	ENSMUST00000029355	194159	-1	ENSMUST00000030751	16353	-1	ENSMUST00000032272	22160	-1	ENSMUST00000034079	15030	-1
ENSMUST00000113165	110359	1	ENSMUST00000019938	17658	-1	ENSMUST00000021425	1597	-1	ENSMUST00000022720	15895	-1	ENSMUST00000024748	3208	-1	ENSMUST00000026076	189817	-1	ENSMUST00000027748	4909	-1	ENSMUST00000029355	197653	-1	ENSMUST00000030751	16415	-1	ENSMUST00000032272	22800	-1	ENSMUST00000034079	15248	-1
ENSMUST00000113158	3259	1	ENSMUST00000019938	17967	-1	ENSMUST00000021425	192	-1	ENSMUST00000022720	15976	-1	ENSMUST00000024748	329	-1	ENSMUST00000026076	190216	-1	ENSMUST00000027748	4965	-1	ENSMUST00000029355	198649	-1	ENSMUST00000030751	17504	-1	ENSMUST00000032272	24389	-1	ENSMUST00000034079	15575	-1
ENSMUST00000113158	4951	1	ENSMUST00000019938	18287	-1	ENSMUST00000021425	2168	-1	ENSMUST00000022720	16189	-1	ENSMUST00000024748	3386	-1	ENSMUST00000026076	199168	-1	ENSMUST00000027748	5086	-1	ENSMUST00000029355	199100	-1	ENSMUST00000030751	18237	-1	ENSMUST00000032272	2452	-1	ENSMUST00000034079	16173	-1
ENSMUST00000113158	4964	1	ENSMUST00000019938	18513	-1	ENSMUST00000021425	2346	-1	ENSMUST00000022720	16200	-1	ENSMUST00000024748	3420	-1	ENSMUST00000026076	200716	-1	ENSMUST00000027748	5099	-1	ENSMUST00000029355	200488	-1	ENSMUST00000030751	18600	-1	ENSMUST00000032272	24707	-1	ENSMUST00000034079	17308	-1
ENSMUST00000113158	5129	1	ENSMUST00000019938	19758	-1	ENSMUST00000021425	2465	-1	ENSMUST00000022720	16845	-1	ENSMUST00000024748	3460	-1	ENSMUST00000026076	201174	-1	ENSMUST00000027748	616	-1	ENSMUST00000029355	202158	-1	ENSMUST00000030751	18624	-1	ENSMUST00000032272	26623	-1	ENSMUST00000034079	17552	-1
ENSMUST00000113158	5342	1	ENSMUST00000019938	20588	-1	ENSMUST00000021425	258	-1	ENSMUST00000022720	16866	-1	ENSMUST00000024748	3741	-1	ENSMUST00000026076	205900	-1	ENSMUST00000027748	739	-1	ENSMUST00000029355	20569	-1	ENSMUST00000030751	18642	-1	ENSMUST00000032272	26641	-1	ENSMUST00000034079	18001	-1
ENSMUST00000113158	5699	1	ENSMUST00000019938	20697	-1	ENSMUST00000021425	2768	-1	ENSMUST00000022720	17058	-1	ENSMUST00000024748	3928	-1	ENSMUST00000026076	207299	-1	ENSMUST00000027748	827	-1	ENSMUST00000029355	209782	-1	ENSMUST00000030751	18670	-1	ENSMUST00000032272	29795	-1	ENSMUST00000034079	18255	-1
ENSMUST00000113158	4945	1	ENSMUST00000019938	21133	-1	ENSMUST00000021425	2774	-1	ENSMUST00000022720	17368	-1	ENSMUST00000024748	4105	-1	ENSMUST00000026076	207713	-1	ENSMUST00000027752	103672	-1	ENSMUST00000029355	210292	-1	ENSMUST00000030751	18687	-1	ENSMUST00000032272	309	-1	ENSMUST00000034079	18477	-1
ENSMUST00000028125	3371	1	ENSMUST00000019938	213	-1	ENSMUST00000021425	2823	-1	ENSMUST00000022720	1742	-1	ENSMUST00000024748	4139	-1	ENSMUST00000026076	210603	-1	ENSMUST00000027752	105669	-1	ENSMUST00000029355	213811	-1	ENSMUST00000030751	19453	-1	ENSMUST00000032272	3157	-1	ENSMUST00000034079	18572	-1
ENSMUST00000028125	4749	1	ENSMUST00000019938	21474	-1	ENSMUST00000021425	2907	-1	ENSMUST00000022720	17527	-1	ENSMUST00000024748	4274	-1	ENSMUST00000026076	210800	-1	ENSMUST00000027752	106705	-1	ENSMUST00000029355	217765	-1	ENSMUST00000030751	19491	-1	ENSMUST00000032272	33448	-1	ENSMUST00000034079	18841	-1
ENSMUST00000028125	3493	1	ENSMUST00000019938	2524	-1	ENSMUST00000021425	3126	-1	ENSMUST00000022720	17580	-1	ENSMUST00000024748	4299	-1	ENSMUST00000026076	214638	-1	ENSMUST00000027752	106971	-1	ENSMUST00000029355	224859	-1	ENSMUST00000030751	20086	-1	ENSMUST00000032272	3491	-1	ENSMUST00000034079	19100	-1
ENSMUST00000028125	4160	1	ENSMUST00000019938	2529	-1	ENSMUST00000021425	3161	-1	ENSMUST00000022720	1776	-1	ENSMUST00000024748	4350	-1	ENSMUST00000026076	215431	-1	ENSMUST00000027752	111475	-1	ENSMUST00000029355	225767	-1	ENSMUST00000030751	20858	-1	ENSMUST00000032272	34961	-1	ENSMUST00000034079	19476	-1
ENSMUST00000028125	4725	1	ENSMUST00000019938	2916	-1	ENSMUST00000021425	3454	-1	ENSMUST00000022720	17993	-1	ENSMUST00000024748	4356	-1	ENSMUST00000026076	219244	-1	ENSMUST00000027752	113384	-1	ENSMUST00000029355	231961	-1	ENSMUST00000030751	2101	-1	ENSMUST00000032272	35109	-1	ENSMUST00000034079	19708	-1
ENSMUST00000041555	121	1	ENSMUST00000019938	4039	-1	ENSMUST00000021425	3663	-1	ENSMUST00000022720	18196	-1	ENSMUST00000024748	4397	-1	ENSMUST00000026076	25815	-1	ENSMUST00000027752	113489	-1	ENSMUST00000029355	234180	-1	ENSMUST00000030751	23644	-1	ENSMUST00000032272	3558	-1	ENSMUST00000034079	19855	-1
ENSMUST00000041555	211	1	ENSMUST00000019938	4217	-1	ENSMUST00000021425	3706	-1	ENSMUST00000022720	18386	-1	ENSMUST00000024748	4606	-1	ENSMUST00000026076	27069	-1	ENSMUST00000027752	113584	-1	ENSMUST00000029355	2959	-1	ENSMUST00000030751	24213	-1	ENSMUST00000032272	37059	-1	ENSMUST00000034079	20280	-1
ENSMUST00000041555	1086	1	ENSMUST00000019938	4458	-1	ENSMUST00000021425	3909	-1	ENSMUST00000022720	18550	-1	ENSMUST00000024748	500	-1	ENSMUST00000026076	35800	-1	ENSMUST00000027752	13502	-1	ENSMUST00000029355	3408	-1	ENSMUST00000030751	25054	-1	ENSMUST00000032272	38897	-1	ENSMUST00000034079	20457	-1
ENSMUST00000041555	1287	1	ENSMUST00000019938	4541	-1	ENSMUST00000021425	4059	-1	ENSMUST00000022720	18827	-1	ENSMUST00000024748	5001	-1	ENSMUST00000026076	38408	-1	ENSMUST00000027752	16159	-1	ENSMUST00000029355	34976	-1	ENSMUST00000030751	26094	-1	ENSMUST00000032272	38951	-1	ENSMUST00000034079	20570	-1
ENSMUST00000041555	1448	1	ENSMUST00000019938	4699	-1	ENSMUST00000021425	4071	-1	ENSMUST00000022720	19025	-1	ENSMUST00000024748	5114	-1	ENSMUST00000026076	40364	-1	ENSMUST00000027752	16246	-1	ENSMUST00000029355	35579	-1	ENSMUST00000030751	27010	-1	ENSMUST00000032272	39317	-1	ENSMUST00000034079	21257	-1
ENSMUST00000041555	1548	1	ENSMUST00000019938	5358	-1	ENSMUST00000021425	4084	-1	ENSMUST00000022720	19267	-1	ENSMUST00000024748	5139	-1	ENSMUST00000026076	53710	-1	ENSMUST00000027752	18989	-1	ENSMUST00000029355	35912	-1	ENSMUST00000030751	27023	-1	ENSMUST00000032272	39538	-1	ENSMUST00000034079	2140	-1
ENSMUST00000041555	1639	1	ENSMUST00000019938	5552	-1	ENSMUST00000021425	4099	-1	ENSMUST00000022720	2116	-1	ENSMUST00000024748	5169	-1	ENSMUST00000026076	59353	-1	ENSMUST00000027752	20474	-1	ENSMUST00000029355	41848	-1	ENSMUST00000030751	27224	-1	ENSMUST00000032272	40765	-1	ENSMUST00000034079	21776	-1
ENSMUST00000041555	1808	1	ENSMUST00000019938	6097	-1	ENSMUST00000021425	4169	-1	ENSMUST00000022720	2445	-1	ENSMUST00000024748	5327	-1	ENSMUST00000026076	62939	-1	ENSMUST00000027752	22599	-1	ENSMUST00000029355	41917	-1	ENSMUST00000030751	28041	-1	ENSMUST00000032272	40818	-1	ENSMUST00000034079	21874	-1
ENSMUST00000041555	1950	1	ENSMUST00000019938	6288	-1	ENSMUST00000021425	4180	-1	ENSMUST00000022720	3238	-1	ENSMUST00000024748	5939	-1	ENSMUST00000026076	63896	-1	ENSMUST00000027752	22935	-1	ENSMUST00000029355	43049	-1	ENSMUST00000030751	28117	-1	ENSMUST00000032272	4169	-1	ENSMUST00000034079	21896	-1
ENSMUST00000041555	1961	1	ENSMUST00000019938	67	-1	ENSMUST00000021425	4233	-1	ENSMUST00000022720	3437	-1	ENSMUST00000024748	6097	-1	ENSMUST00000026076	69677	-1	ENSMUST00000027752	25469	-1	ENSMUST00000029355	47146	-1	ENSMUST00000030751	28242	-1	ENSMUST00000032272	43029	-1	ENSMUST00000034079	23168	-1
ENSMUST00000041555	2011	1	ENSMUST00000019938	6822	-1	ENSMUST00000021425	4319	-1	ENSMUST00000022720	3673	-1	ENSMUST00000024748	6131	-1	ENSMUST00000026076	71296	-1	ENSMUST00000027752	25695	-1	ENSMUST00000029355	49231	-1	ENSMUST00000030751	28277	-1	ENSMUST00000032272	4451	-1	ENSMUST00000034079	23284	-1
ENSMUST00000041555	2070	1	ENSMUST00000019938	7030	-1	ENSMUST00000021425	4369	-1	ENSMUST00000022720	4118	-1	ENSMUST00000024748	6373	-1	ENSMUST00000026076	73380	-1	ENSMUST00000027752	29531	-1	ENSMUST00000029355	5556	-1	ENSMUST00000030751	28925	-1	ENSMUST00000032272	45002	-1	ENSMUST00000034079	23645	-1
ENSMUST00000041555	2554	1	ENSMUST00000019938	7041	-1	ENSMUST00000021425	4674	-1	ENSMUST00000022720	5266	-1	ENSMUST00000024748	657	-1	ENSMUST00000026076	76847	-1	ENSMUST00000027752	31792	-1	ENSMUST00000029355	57245	-1	ENSMUST00000030751	29273	-1	ENSMUST00000032272	46418	-1	ENSMUST00000034079	24008	-1
ENSMUST00000041555	2906	1	ENSMUST00000019938	7275	-1	ENSMUST00000021425	4986	-1	ENSMUST00000022720	5387	-1	ENSMUST00000024748	6608	-1	ENSMUST00000026076	78109	-1	ENSMUST00000027752	3211	-1	ENSMUST00000029355	58461	-1	ENSMUST00000030751	2953	-1	ENSMUST00000032272	47982	-1	ENSMUST00000034079	2412	-1
ENSMUST00000041555	2913	1	ENSMUST00000019938	7400	-1	ENSMUST00000021425	5020	-1	ENSMUST00000022720	5494	-1	ENSMUST00000024748	6950	-1	ENSMUST00000026076	78892	-1	ENSMUST00000027752	32791	-1	ENSMUST00000029355	66720	-1	ENSMUST00000030751	30185	-1	ENSMUST00000032272	48506	-1	ENSMUST00000034079	25730	-1
ENSMUST00000041555	2916	1	ENSMUST00000019938	76	-1	ENSMUST00000021425	5114	-1	ENSMUST00000022720	5516	-1	ENSMUST00000024748	7116	-1	ENSMUST00000026076	82220	-1	ENSMUST00000027752	33057	-1	ENSMUST00000029355	70823	-1	ENSMUST00000030751	30693	-1	ENSMUST00000032272	49075	-1	ENSMUST00000034079	26322	-1
ENSMUST00000041555	3191	1	ENSMUST00000019938	7607	-1	ENSMUST00000021425	5362	-1	ENSMUST00000022720	5970	-1	ENSMUST00000024748	7195	-1	ENSMUST00000026076	84130	-1	ENSMUST00000027752	33491	-1	ENSMUST00000029355	71428	-1	ENSMUST00000030751	31022	-1	ENSMUST00000032272	50411	-1	ENSMUST00000034079	26359	-1
ENSMUST00000041555	3208	1	ENSMUST00000019938	7832	-1	ENSMUST00000021425	5592	-1	ENSMUST00000022720	6047	-1	ENSMUST00000024748	7217	-1	ENSMUST00000026076	8651	-1	ENSMUST00000027752	3424	-1	ENSMUST00000029355	75786	-1	ENSMUST00000030751	31599	-1	ENSMUST00000032272	55173	-1	ENSMUST00000034079	26717	-1
ENSMUST00000041555	3276	1	ENSMUST00000019938	8107	-1	ENSMUST00000021425	5701	-1	ENSMUST00000022720	6183	-1	ENSMUST00000024748	7301	-1	ENSMUST00000026076	90965	-1	ENSMUST00000027752	37189	-1	ENSMUST00000029355	80290	-1	ENSMUST00000030751	31815	-1	ENSMUST00000032272	5547	-1	ENSMUST00000034079	28634	-1
ENSMUST00000041555	3314	1	ENSMUST00000019938	8540	-1	ENSMUST00000021425	5914	-1	ENSMUST00000022720	6695	-1	ENSMUST00000024748	7335	-1	ENSMUST00000026076	91992	-1	ENSMUST00000027752	3719	-1	ENSMUST00000029355	83447	-1	ENSMUST00000030751	32206	-1	ENSMUST00000032272	55978	-1	ENSMUST00000034079	28648	-1
ENSMUST00000147337	216510	1	ENSMUST00000019938	8714	-1	ENSMUST00000021425	6254	-1	ENSMUST00000022720	6776	-1	ENSMUST00000024748	7531	-1	ENSMUST00000026076	9608	-1	ENSMUST00000027752	38788	-1	ENSMUST00000029355	84783	-1	ENSMUST00000030751	32639	-1	ENSMUST00000032272	56964	-1	ENSMUST00000034079	28733	-1
ENSMUST00000102800	1139	1	ENSMUST00000019938	9016	-1	ENSMUST00000021425	6262	-1	ENSMUST00000022720	737	-1	ENSMUST00000024748	7598	-1	ENSMUST00000026076	98065	-1	ENSMUST00000027752	40569	-1	ENSMUST00000029355	89032	-1	ENSMUST00000030751	32735	-1	ENSMUST00000032272	5812	-1	ENSMUST00000034079	28864	-1
ENSMUST00000102800	1826	1	ENSMUST00000019938	9211	-1	ENSMUST00000021425	6819	-1	ENSMUST00000022720	7820	-1	ENSMUST00000024748	7608	-1	ENSMUST00000026076	99291	-1	ENSMUST00000027752	4205	-1	ENSMUST00000029355	96302	-1	ENSMUST00000030751	33127	-1	ENSMUST00000032272	60919	-1	ENSMUST00000034079	30022	-1
ENSMUST00000102800	1833	1	ENSMUST00000019938	9498	-1	ENSMUST00000021425	6830	-1	ENSMUST00000022720	7974	-1	ENSMUST00000024748	7723	-1	ENSMUST00000026076	99346	-1	ENSMUST00000027752	42551	-1	ENSMUST00000029355	97863	-1	ENSMUST00000030751	34411	-1	ENSMUST00000032272	62074	-1	ENSMUST00000034079	30928	-1
ENSMUST00000102800	1864	1	ENSMUST00000019938	9866	-1	ENSMUST00000021425	6893	-1	ENSMUST00000022720	8833	-1	ENSMUST00000024748	7768	-1	ENSMUST00000026084	112	-1	ENSMUST00000027752	43561	-1	ENSMUST00000029367	10698	-1	ENSMUST00000030751	34491	-1	ENSMUST00000032272	62700	-1	ENSMUST00000034079	32770	-1
ENSMUST00000102800	52680	1	ENSMUST00000019951	10088	-1	ENSMUST00000021425	695	-1	ENSMUST00000022720	9207	-1	ENSMUST00000024748	7794	-1	ENSMUST00000026084	11361	-1	ENSMUST00000027752	45977	-1	ENSMUST00000029367	12671	-1	ENSMUST00000030751	37676	-1	ENSMUST00000032272	63846	-1	ENSMUST00000034079	33646	-1
ENSMUST00000102800	52697	1	ENSMUST00000019951	10905	-1	ENSMUST00000021425	6985	-1	ENSMUST00000022720	9645	-1	ENSMUST00000024748	7798	-1	ENSMUST00000026084	1186	-1	ENSMUST00000027752	47401	-1	ENSMUST00000029367	13695	-1	ENSMUST00000030751	38809	-1	ENSMUST00000032272	63868	-1	ENSMUST00000034079	33750	-1
ENSMUST00000100171	3889	1	ENSMUST00000019951	1091	-1	ENSMUST00000021425	6989	-1	ENSMUST00000022720	9696	-1	ENSMUST00000024748	8038	-1	ENSMUST00000026084	1216	-1	ENSMUST00000027752	52074	-1	ENSMUST00000029367	17547	-1	ENSMUST00000030751	5102	-1	ENSMUST00000032272	6698	-1	ENSMUST00000034079	4152	-1
ENSMUST00000100171	3898	1	ENSMUST00000019951	11154	-1	ENSMUST00000021425	7050	-1	ENSMUST00000022720	9977	-1	ENSMUST00000024748	811	-1	ENSMUST00000026084	1225	-1	ENSMUST00000027752	53201	-1	ENSMUST00000029367	19035	-1	ENSMUST00000030751	5400	-1	ENSMUST00000032272	8479	-1	ENSMUST00000034079	503	-1
ENSMUST00000100171	3920	1	ENSMUST00000019951	11408	-1	ENSMUST00000021425	7219	-1	ENSMUST00000022721	1000	-1	ENSMUST00000024748	8337	-1	ENSMUST00000026084	1294	-1	ENSMUST00000027752	58847	-1	ENSMUST00000029367	19999	-1	ENSMUST00000030751	5640	-1	ENSMUST00000032272	9040	-1	ENSMUST00000034079	5119	-1
ENSMUST00000100171	4060	1	ENSMUST00000019951	1176	-1	ENSMUST00000021425	965	-1	ENSMUST00000022721	1089	-1	ENSMUST00000024749	1002	-1	ENSMUST00000026084	1309	-1	ENSMUST00000027752	59559	-1	ENSMUST00000029367	20067	-1	ENSMUST00000030751	5912	-1	ENSMUST00000032272	9251	-1	ENSMUST00000034079	6767	-1
ENSMUST00000100171	4068	1	ENSMUST00000019951	12919	-1	ENSMUST00000021438	101328	-1	ENSMUST00000022721	1291	-1	ENSMUST00000024749	10054	-1	ENSMUST00000026084	13546	-1	ENSMUST00000027752	66286	-1	ENSMUST00000029367	20746	-1	ENSMUST00000030751	5932	-1	ENSMUST00000032272	9275	-1	ENSMUST00000034079	7010	-1
ENSMUST00000100171	4094	1	ENSMUST00000019951	13754	-1	ENSMUST00000021438	102972	-1	ENSMUST00000022721	1568	-1	ENSMUST00000024749	10323	-1	ENSMUST00000026084	15593	-1	ENSMUST00000027752	67069	-1	ENSMUST00000029367	2088	-1	ENSMUST00000030751	7040	-1	ENSMUST00000032279	106300	-1	ENSMUST00000034079	7027	-1
ENSMUST00000100171	3598	1	ENSMUST00000019951	14426	-1	ENSMUST00000021438	103581	-1	ENSMUST00000022721	1640	-1	ENSMUST00000024749	10470	-1	ENSMUST00000026084	161	-1	ENSMUST00000027752	68140	-1	ENSMUST00000029367	21759	-1	ENSMUST00000030751	7433	-1	ENSMUST00000032279	120065	-1	ENSMUST00000034079	7301	-1
ENSMUST00000100171	3809	1	ENSMUST00000019951	15157	-1	ENSMUST00000021438	106640	-1	ENSMUST00000022721	1784	-1	ENSMUST00000024749	10630	-1	ENSMUST00000026084	1627	-1	ENSMUST00000027752	71077	-1	ENSMUST00000029367	26226	-1	ENSMUST00000030751	7919	-1	ENSMUST00000032279	120427	-1	ENSMUST00000034079	7844	-1
ENSMUST00000113068	16240	1	ENSMUST00000019951	16496	-1	ENSMUST00000021438	108333	-1	ENSMUST00000022721	1826	-1	ENSMUST00000024749	10841	-1	ENSMUST00000026084	16503	-1	ENSMUST00000027752	71160	-1	ENSMUST00000029367	29301	-1	ENSMUST00000030751	8513	-1	ENSMUST00000032279	123478	-1	ENSMUST00000034079	7973	-1
ENSMUST00000113068	16515	1	ENSMUST00000019951	17476	-1	ENSMUST00000021438	108410	-1	ENSMUST00000022721	1870	-1	ENSMUST00000024749	11790	-1	ENSMUST00000026084	16933	-1	ENSMUST00000027752	71189	-1	ENSMUST00000029367	32129	-1	ENSMUST00000030751	9325	-1	ENSMUST00000032279	126984	-1	ENSMUST00000034079	940	-1
ENSMUST00000113068	16544	1	ENSMUST00000019951	1749	-1	ENSMUST00000021438	108937	-1	ENSMUST00000022721	1874	-1	ENSMUST00000024749	12879	-1	ENSMUST00000026084	17660	-1	ENSMUST00000027752	71431	-1	ENSMUST00000029367	33206	-1	ENSMUST00000030751	9886	-1	ENSMUST00000032279	133292	-1	ENSMUST00000034079	9926	-1
ENSMUST00000113068	16886	1	ENSMUST00000019951	18725	-1	ENSMUST00000021438	111592	-1	ENSMUST00000022721	1927	-1	ENSMUST00000024749	13173	-1	ENSMUST00000026084	17905	-1	ENSMUST00000027752	72058	-1	ENSMUST00000029367	33502	-1	ENSMUST00000030757	10278	-1	ENSMUST00000032279	137254	-1	ENSMUST00000034086	10968	-1
ENSMUST00000172159	1666	1	ENSMUST00000019951	18732	-1	ENSMUST00000021438	114304	-1	ENSMUST00000022721	2077	-1	ENSMUST00000024749	14204	-1	ENSMUST00000026084	18570	-1	ENSMUST00000027752	75726	-1	ENSMUST00000029367	3426	-1	ENSMUST00000030757	1105	-1	ENSMUST00000032279	146835	-1	ENSMUST00000034086	12736	-1
ENSMUST00000045776	284	1	ENSMUST00000019951	1889	-1	ENSMUST00000021438	117095	-1	ENSMUST00000022721	2294	-1	ENSMUST00000024749	14456	-1	ENSMUST00000026084	19114	-1	ENSMUST00000027752	77176	-1	ENSMUST00000029367	3438	-1	ENSMUST00000030757	11196	-1	ENSMUST00000032279	147598	-1	ENSMUST00000034086	14965	-1
ENSMUST00000045776	11615	1	ENSMUST00000019951	19598	-1	ENSMUST00000021438	117165	-1	ENSMUST00000022721	2355	-1	ENSMUST00000024749	15318	-1	ENSMUST00000026084	19316	-1	ENSMUST00000027752	77682	-1	ENSMUST00000029367	35451	-1	ENSMUST00000030757	11217	-1	ENSMUST00000032279	14762	-1	ENSMUST00000034086	15923	-1
ENSMUST00000045776	11646	1	ENSMUST00000019951	20009	-1	ENSMUST00000021438	117547	-1	ENSMUST00000022721	2442	-1	ENSMUST00000024749	15853	-1	ENSMUST00000026084	19602	-1	ENSMUST00000027752	83923	-1	ENSMUST00000029367	36048	-1	ENSMUST00000030757	11329	-1	ENSMUST00000032279	147646	-1	ENSMUST00000034086	20253	-1
ENSMUST00000045776	11654	1	ENSMUST00000019951	20118	-1	ENSMUST00000021438	119595	-1	ENSMUST00000022721	2840	-1	ENSMUST00000024749	15891	-1	ENSMUST00000026084	19778	-1	ENSMUST00000027752	84569	-1	ENSMUST00000029367	36361	-1	ENSMUST00000030757	11378	-1	ENSMUST00000032279	148879	-1	ENSMUST00000034086	22086	-1
ENSMUST00000045776	11661	1	ENSMUST00000019951	20719	-1	ENSMUST00000021438	121794	-1	ENSMUST00000022721	2901	-1	ENSMUST00000024749	16042	-1	ENSMUST00000026084	19878	-1	ENSMUST00000027752	85807	-1	ENSMUST00000029367	36410	-1	ENSMUST00000030757	12333	-1	ENSMUST00000032279	151645	-1	ENSMUST00000034086	2326	-1
ENSMUST00000102794	877	1	ENSMUST00000019951	21122	-1	ENSMUST00000021438	122293	-1	ENSMUST00000022721	3087	-1	ENSMUST00000024749	16578	-1	ENSMUST00000026084	20127	-1	ENSMUST00000027752	88687	-1	ENSMUST00000029367	36516	-1	ENSMUST00000030757	12416	-1	ENSMUST00000032279	154855	-1	ENSMUST00000034086	23306	-1
ENSMUST00000102794	880	1	ENSMUST00000019951	21131	-1	ENSMUST00000021438	14106	-1	ENSMUST00000022721	3395	-1	ENSMUST00000024749	17254	-1	ENSMUST00000026084	20530	-1	ENSMUST00000027752	88826	-1	ENSMUST00000029367	39603	-1	ENSMUST00000030757	12562	-1	ENSMUST00000032279	154959	-1	ENSMUST00000034086	24217	-1
ENSMUST00000102794	905	1	ENSMUST00000019951	2199	-1	ENSMUST00000021438	15175	-1	ENSMUST00000022721	3490	-1	ENSMUST00000024749	17465	-1	ENSMUST00000026084	21440	-1	ENSMUST00000027752	89232	-1	ENSMUST00000029367	40896	-1	ENSMUST00000030757	12855	-1	ENSMUST00000032279	156959	-1	ENSMUST00000034086	27913	-1
ENSMUST00000102794	1290	1	ENSMUST00000019951	2214	-1	ENSMUST00000021438	17168	-1	ENSMUST00000022721	3744	-1	ENSMUST00000024749	17681	-1	ENSMUST00000026084	21878	-1	ENSMUST00000027752	90416	-1	ENSMUST00000029367	41080	-1	ENSMUST00000030757	1366	-1	ENSMUST00000032279	159763	-1	ENSMUST00000034086	28352	-1
ENSMUST00000102794	1303	1	ENSMUST00000019951	22472	-1	ENSMUST00000021438	20544	-1	ENSMUST00000022721	4065	-1	ENSMUST00000024749	17882	-1	ENSMUST00000026084	22285	-1	ENSMUST00000027752	92385	-1	ENSMUST00000029367	42080	-1	ENSMUST00000030757	13726	-1	ENSMUST00000032279	161927	-1	ENSMUST00000034086	30445	-1
ENSMUST00000102794	1479	1	ENSMUST00000019951	2307	-1	ENSMUST00000021438	21187	-1	ENSMUST00000022721	4142	-1	ENSMUST00000024749	18682	-1	ENSMUST00000026084	22740	-1	ENSMUST00000027752	93281	-1	ENSMUST00000029367	4273	-1	ENSMUST00000030757	14025	-1	ENSMUST00000032279	162554	-1	ENSMUST00000034086	31314	-1
ENSMUST00000028248	639	1	ENSMUST00000019951	23113	-1	ENSMUST00000021438	21602	-1	ENSMUST00000022721	4253	-1	ENSMUST00000024749	18980	-1	ENSMUST00000026084	22900	-1	ENSMUST00000027752	93451	-1	ENSMUST00000029367	43601	-1	ENSMUST00000030757	15202	-1	ENSMUST00000032279	16410	-1	ENSMUST00000034086	31614	-1
ENSMUST00000028248	151500	1	ENSMUST00000019951	24198	-1	ENSMUST00000021438	23491	-1	ENSMUST00000022721	4417	-1	ENSMUST00000024749	19209	-1	ENSMUST00000026084	23423	-1	ENSMUST00000027752	93846	-1	ENSMUST00000029367	4398	-1	ENSMUST00000030757	15844	-1	ENSMUST00000032279	164116	-1	ENSMUST00000034086	32221	-1
ENSMUST00000028248	151526	1	ENSMUST00000019951	25328	-1	ENSMUST00000021438	25189	-1	ENSMUST00000022721	451	-1	ENSMUST00000024749	1928	-1	ENSMUST00000026084	23596	-1	ENSMUST00000027752	96163	-1	ENSMUST00000029367	46088	-1	ENSMUST00000030757	16064	-1	ENSMUST00000032279	165725	-1	ENSMUST00000034086	34026	-1
ENSMUST00000028248	226889	1	ENSMUST00000019951	2566	-1	ENSMUST00000021438	25496	-1	ENSMUST00000022721	4673	-1	ENSMUST00000024749	1942	-1	ENSMUST00000026084	23853	-1	ENSMUST00000027752	97247	-1	ENSMUST00000029367	47184	-1	ENSMUST00000030757	16172	-1	ENSMUST00000032279	166285	-1	ENSMUST00000034086	34077	-1
ENSMUST00000028248	227999	1	ENSMUST00000019951	25767	-1	ENSMUST00000021438	26393	-1	ENSMUST00000022721	468	-1	ENSMUST00000024749	19425	-1	ENSMUST00000026084	2407	-1	ENSMUST00000027752	97943	-1	ENSMUST00000029367	47544	-1	ENSMUST00000030757	17385	-1	ENSMUST00000032279	169100	-1	ENSMUST00000034086	36595	-1
ENSMUST00000028248	228279	1	ENSMUST00000019951	26143	-1	ENSMUST00000021438	27732	-1	ENSMUST00000022721	4692	-1	ENSMUST00000024749	1968	-1	ENSMUST00000026084	25402	-1	ENSMUST00000027752	99265	-1	ENSMUST00000029367	48483	-1	ENSMUST00000030757	17446	-1	ENSMUST00000032279	170514	-1	ENSMUST00000034086	36710	-1
ENSMUST00000112963	476	1	ENSMUST00000019951	26273	-1	ENSMUST00000021438	39469	-1	ENSMUST00000022721	5178	-1	ENSMUST00000024749	19904	-1	ENSMUST00000026084	26833	-1	ENSMUST00000027766	10020	-1	ENSMUST00000029367	50228	-1	ENSMUST00000030757	17494	-1	ENSMUST00000032279	184246	-1	ENSMUST00000034086	38288	-1
ENSMUST00000112963	558	1	ENSMUST00000019951	26789	-1	ENSMUST00000021438	43445	-1	ENSMUST00000022721	5380	-1	ENSMUST00000024749	20260	-1	ENSMUST00000026084	27979	-1	ENSMUST00000027766	10739	-1	ENSMUST00000029367	51911	-1	ENSMUST00000030757	18131	-1	ENSMUST00000032279	188797	-1	ENSMUST00000034086	38298	-1
ENSMUST00000112963	593	1	ENSMUST00000019951	2767	-1	ENSMUST00000021438	46724	-1	ENSMUST00000022721	5572	-1	ENSMUST00000024749	2040	-1	ENSMUST00000026084	29068	-1	ENSMUST00000027766	11242	-1	ENSMUST00000029367	55332	-1	ENSMUST00000030757	19192	-1	ENSMUST00000032279	194920	-1	ENSMUST00000034086	38433	-1
ENSMUST00000112963	662	1	ENSMUST00000019951	3045	-1	ENSMUST00000021438	49999	-1	ENSMUST00000022721	5625	-1	ENSMUST00000024749	20756	-1	ENSMUST00000026084	29715	-1	ENSMUST00000027766	11474	-1	ENSMUST00000029367	56251	-1	ENSMUST00000030757	19273	-1	ENSMUST00000032279	195067	-1	ENSMUST00000034086	3956	-1
ENSMUST00000112963	876	1	ENSMUST00000019951	3061	-1	ENSMUST00000021438	51692	-1	ENSMUST00000022721	5786	-1	ENSMUST00000024749	20765	-1	ENSMUST00000026084	30018	-1	ENSMUST00000027766	11792	-1	ENSMUST00000029367	56741	-1	ENSMUST00000030757	23225	-1	ENSMUST00000032279	197876	-1	ENSMUST00000034086	40013	-1
ENSMUST00000112963	1401	1	ENSMUST00000019951	3208	-1	ENSMUST00000021438	53105	-1	ENSMUST00000022721	5894	-1	ENSMUST00000024749	21127	-1	ENSMUST00000026084	3020	-1	ENSMUST00000027766	13012	-1	ENSMUST00000029367	56798	-1	ENSMUST00000030757	23402	-1	ENSMUST00000032279	199162	-1	ENSMUST00000034086	43256	-1
ENSMUST00000112963	1522	1	ENSMUST00000019951	3270	-1	ENSMUST00000021438	58039	-1	ENSMUST00000022721	5935	-1	ENSMUST00000024749	22880	-1	ENSMUST00000026084	31147	-1	ENSMUST00000027766	1338	-1	ENSMUST00000029367	57323	-1	ENSMUST00000030757	23765	-1	ENSMUST00000032279	20503	-1	ENSMUST00000034086	43987	-1
ENSMUST00000028250	52752	1	ENSMUST00000019951	4623	-1	ENSMUST00000021438	58911	-1	ENSMUST00000022721	6004	-1	ENSMUST00000024749	23592	-1	ENSMUST00000026084	3147	-1	ENSMUST00000027766	1362	-1	ENSMUST00000029367	60423	-1	ENSMUST00000030757	2770	-1	ENSMUST00000032279	205924	-1	ENSMUST00000034086	44052	-1
ENSMUST00000112940	1243	1	ENSMUST00000019951	4950	-1	ENSMUST00000021438	61022	-1	ENSMUST00000022721	6083	-1	ENSMUST00000024749	24225	-1	ENSMUST00000026084	31674	-1	ENSMUST00000027766	14150	-1	ENSMUST00000029367	60729	-1	ENSMUST00000030757	29660	-1	ENSMUST00000032279	206916	-1	ENSMUST00000034086	44296	-1
ENSMUST00000112940	1303	1	ENSMUST00000019951	5737	-1	ENSMUST00000021438	62744	-1	ENSMUST00000022721	6124	-1	ENSMUST00000024749	24708	-1	ENSMUST00000026084	31896	-1	ENSMUST00000027766	14557	-1	ENSMUST00000029367	61003	-1	ENSMUST00000030757	31514	-1	ENSMUST00000032279	207031	-1	ENSMUST00000034086	44372	-1
ENSMUST00000112940	1567	1	ENSMUST00000019951	6387	-1	ENSMUST00000021438	65130	-1	ENSMUST00000022721	6150	-1	ENSMUST00000024749	24722	-1	ENSMUST00000026084	32023	-1	ENSMUST00000027766	15315	-1	ENSMUST00000029367	61823	-1	ENSMUST00000030757	31820	-1	ENSMUST00000032279	208758	-1	ENSMUST00000034086	44409	-1
ENSMUST00000112934	5208	1	ENSMUST00000019951	6445	-1	ENSMUST00000021438	67447	-1	ENSMUST00000022721	6245	-1	ENSMUST00000024749	24745	-1	ENSMUST00000026084	3205	-1	ENSMUST00000027766	15445	-1	ENSMUST00000029367	62506	-1	ENSMUST00000030757	32872	-1	ENSMUST00000032279	209984	-1	ENSMUST00000034086	45653	-1
ENSMUST00000112932	3129	1	ENSMUST00000019951	6476	-1	ENSMUST00000021438	71458	-1	ENSMUST00000022721	6275	-1	ENSMUST00000024749	25191	-1	ENSMUST00000026084	32157	-1	ENSMUST00000027766	15952	-1	ENSMUST00000029367	62800	-1	ENSMUST00000030757	32956	-1	ENSMUST00000032279	211522	-1	ENSMUST00000034086	46033	-1
ENSMUST00000112932	3295	1	ENSMUST00000019951	652	-1	ENSMUST00000021438	71489	-1	ENSMUST00000022721	6529	-1	ENSMUST00000024749	25429	-1	ENSMUST00000026084	3265	-1	ENSMUST00000027766	16039	-1	ENSMUST00000029367	64641	-1	ENSMUST00000030757	333	-1	ENSMUST00000032279	222643	-1	ENSMUST00000034086	46376	-1
ENSMUST00000112932	3444	1	ENSMUST00000019951	6858	-1	ENSMUST00000021438	72971	-1	ENSMUST00000022721	6871	-1	ENSMUST00000024749	2545	-1	ENSMUST00000026084	32968	-1	ENSMUST00000027766	16145	-1	ENSMUST00000029367	6487	-1	ENSMUST00000030757	33504	-1	ENSMUST00000032279	224215	-1	ENSMUST00000034086	47015	-1
ENSMUST00000112932	3631	1	ENSMUST00000019951	7352	-1	ENSMUST00000021438	74821	-1	ENSMUST00000022721	6897	-1	ENSMUST00000024749	26872	-1	ENSMUST00000026084	33588	-1	ENSMUST00000027766	17870	-1	ENSMUST00000029367	65071	-1	ENSMUST00000030757	33825	-1	ENSMUST00000032279	230122	-1	ENSMUST00000034086	47425	-1
ENSMUST00000112932	3937	1	ENSMUST00000019951	7584	-1	ENSMUST00000021438	76290	-1	ENSMUST00000022721	7020	-1	ENSMUST00000024749	27553	-1	ENSMUST00000026084	33657	-1	ENSMUST00000027766	18212	-1	ENSMUST00000029367	67948	-1	ENSMUST00000030757	34938	-1	ENSMUST00000032279	233214	-1	ENSMUST00000034086	47797	-1
ENSMUST00000112932	4100	1	ENSMUST00000019951	8016	-1	ENSMUST00000021438	76701	-1	ENSMUST00000022721	7166	-1	ENSMUST00000024749	27859	-1	ENSMUST00000026084	34208	-1	ENSMUST00000027766	1910	-1	ENSMUST00000029367	70037	-1	ENSMUST00000030757	37274	-1	ENSMUST00000032279	235758	-1	ENSMUST00000034086	47931	-1
ENSMUST00000112932	10313	1	ENSMUST00000019951	8445	-1	ENSMUST00000021438	77077	-1	ENSMUST00000022721	723	-1	ENSMUST00000024749	28021	-1	ENSMUST00000026084	35130	-1	ENSMUST00000027766	19356	-1	ENSMUST00000029367	70171	-1	ENSMUST00000030757	38207	-1	ENSMUST00000032279	238005	-1	ENSMUST00000034086	48218	-1
ENSMUST00000112932	3842	1	ENSMUST00000019951	8568	-1	ENSMUST00000021438	78198	-1	ENSMUST00000022721	7247	-1	ENSMUST00000024749	28033	-1	ENSMUST00000026084	3517	-1	ENSMUST00000027766	19982	-1	ENSMUST00000029367	70611	-1	ENSMUST00000030757	40166	-1	ENSMUST00000032279	240098	-1	ENSMUST00000034086	48486	-1
ENSMUST00000061179	73931	1	ENSMUST00000019951	8597	-1	ENSMUST00000021438	78293	-1	ENSMUST00000022728	10167	-1	ENSMUST00000024749	28502	-1	ENSMUST00000026084	4325	-1	ENSMUST00000027766	20045	-1	ENSMUST00000029367	71412	-1	ENSMUST00000030757	41379	-1	ENSMUST00000032279	243239	-1	ENSMUST00000034086	48889	-1
ENSMUST00000061179	74030	1	ENSMUST00000019951	861	-1	ENSMUST00000021438	79042	-1	ENSMUST00000022728	10452	-1	ENSMUST00000024749	28998	-1	ENSMUST00000026084	4981	-1	ENSMUST00000027766	20424	-1	ENSMUST00000029367	71860	-1	ENSMUST00000030757	4399	-1	ENSMUST00000032279	253090	-1	ENSMUST00000034086	51747	-1
ENSMUST00000061179	74038	1	ENSMUST00000019951	8669	-1	ENSMUST00000021438	7966	-1	ENSMUST00000022728	1049	-1	ENSMUST00000024749	29024	-1	ENSMUST00000026084	5131	-1	ENSMUST00000027766	20522	-1	ENSMUST00000029367	71993	-1	ENSMUST00000030757	44437	-1	ENSMUST00000032279	28194	-1	ENSMUST00000034086	52626	-1
ENSMUST00000061179	74105	1	ENSMUST00000019951	9222	-1	ENSMUST00000021438	79991	-1	ENSMUST00000022728	11058	-1	ENSMUST00000024749	29162	-1	ENSMUST00000026084	701	-1	ENSMUST00000027766	20567	-1	ENSMUST00000029367	7692	-1	ENSMUST00000030757	44599	-1	ENSMUST00000032279	46050	-1	ENSMUST00000034086	59359	-1
ENSMUST00000061179	74338	1	ENSMUST00000019951	935	-1	ENSMUST00000021438	80293	-1	ENSMUST00000022728	11375	-1	ENSMUST00000024749	29666	-1	ENSMUST00000026084	7461	-1	ENSMUST00000027766	2269	-1	ENSMUST00000029367	8258	-1	ENSMUST00000030757	44774	-1	ENSMUST00000032279	55964	-1	ENSMUST00000034086	59850	-1
ENSMUST00000061179	75024	1	ENSMUST00000019951	9395	-1	ENSMUST00000021438	81038	-1	ENSMUST00000022728	11899	-1	ENSMUST00000024749	30365	-1	ENSMUST00000026084	7563	-1	ENSMUST00000027766	22704	-1	ENSMUST00000029367	9286	-1	ENSMUST00000030757	45225	-1	ENSMUST00000032279	61261	-1	ENSMUST00000034086	60051	-1
ENSMUST00000061179	75058	1	ENSMUST00000019951	9670	-1	ENSMUST00000021438	82652	-1	ENSMUST00000022728	12044	-1	ENSMUST00000024749	30434	-1	ENSMUST00000026084	8178	-1	ENSMUST00000027766	23140	-1	ENSMUST00000029377	10124	-1	ENSMUST00000030757	45661	-1	ENSMUST00000032279	71428	-1	ENSMUST00000034086	6051	-1
ENSMUST00000061179	75324	1	ENSMUST00000019951	9727	-1	ENSMUST00000021438	86872	-1	ENSMUST00000022728	12716	-1	ENSMUST00000024749	3983	-1	ENSMUST00000026084	8294	-1	ENSMUST00000027766	23487	-1	ENSMUST00000029377	10160	-1	ENSMUST00000030757	46398	-1	ENSMUST00000032279	72327	-1	ENSMUST00000034086	63898	-1
ENSMUST00000061179	75444	1	ENSMUST00000019951	9955	-1	ENSMUST00000021438	87249	-1	ENSMUST00000022728	12753	-1	ENSMUST00000024749	4295	-1	ENSMUST00000026084	9576	-1	ENSMUST00000027766	24042	-1	ENSMUST00000029377	10731	-1	ENSMUST00000030757	47476	-1	ENSMUST00000032279	7379	-1	ENSMUST00000034086	64811	-1
ENSMUST00000061179	75614	1	ENSMUST00000019962	10114	-1	ENSMUST00000021438	87416	-1	ENSMUST00000022728	12793	-1	ENSMUST00000024749	5223	-1	ENSMUST00000026084	9692	-1	ENSMUST00000027766	24163	-1	ENSMUST00000029377	10768	-1	ENSMUST00000030757	47862	-1	ENSMUST00000032279	74385	-1	ENSMUST00000034086	65188	-1
ENSMUST00000061179	75641	1	ENSMUST00000019962	10210	-1	ENSMUST00000021438	92093	-1	ENSMUST00000022728	1307	-1	ENSMUST00000024749	5272	-1	ENSMUST00000026120	1510	-1	ENSMUST00000027766	24766	-1	ENSMUST00000029377	11210	-1	ENSMUST00000030757	48812	-1	ENSMUST00000032279	7479	-1	ENSMUST00000034086	65468	-1
ENSMUST00000061179	75677	1	ENSMUST00000019962	10245	-1	ENSMUST00000021438	9459	-1	ENSMUST00000022728	13512	-1	ENSMUST00000024749	5554	-1	ENSMUST00000026120	1532	-1	ENSMUST00000027766	24964	-1	ENSMUST00000029377	11420	-1	ENSMUST00000030757	50515	-1	ENSMUST00000032279	8068	-1	ENSMUST00000034086	65687	-1
ENSMUST00000061179	75806	1	ENSMUST00000019962	10424	-1	ENSMUST00000021438	95499	-1	ENSMUST00000022728	14079	-1	ENSMUST00000024749	6367	-1	ENSMUST00000026120	1550	-1	ENSMUST00000027766	2512	-1	ENSMUST00000029377	12944	-1	ENSMUST00000030757	51180	-1	ENSMUST00000032279	85946	-1	ENSMUST00000034086	66014	-1
ENSMUST00000061179	76040	1	ENSMUST00000019962	10433	-1	ENSMUST00000021438	96581	-1	ENSMUST00000022728	14197	-1	ENSMUST00000024749	7565	-1	ENSMUST00000026120	1558	-1	ENSMUST00000027766	25575	-1	ENSMUST00000029377	13164	-1	ENSMUST00000030757	52054	-1	ENSMUST00000032279	8720	-1	ENSMUST00000034086	67230	-1
ENSMUST00000061179	76176	1	ENSMUST00000019962	10807	-1	ENSMUST00000021438	97022	-1	ENSMUST00000022728	14877	-1	ENSMUST00000024749	7874	-1	ENSMUST00000026120	1633	-1	ENSMUST00000027766	26873	-1	ENSMUST00000029377	13419	-1	ENSMUST00000030757	52397	-1	ENSMUST00000032279	87863	-1	ENSMUST00000034086	67851	-1
ENSMUST00000028279	266	1	ENSMUST00000019962	10908	-1	ENSMUST00000021447	101718	-1	ENSMUST00000022728	15260	-1	ENSMUST00000024749	9243	-1	ENSMUST00000026120	1648	-1	ENSMUST00000027766	26995	-1	ENSMUST00000029377	13660	-1	ENSMUST00000030757	53334	-1	ENSMUST00000032279	91487	-1	ENSMUST00000034086	68176	-1
ENSMUST00000028279	273	1	ENSMUST00000019962	11162	-1	ENSMUST00000021447	102723	-1	ENSMUST00000022728	15653	-1	ENSMUST00000024749	9781	-1	ENSMUST00000026120	1665	-1	ENSMUST00000027766	27574	-1	ENSMUST00000029377	13912	-1	ENSMUST00000030757	53674	-1	ENSMUST00000032279	9719	-1	ENSMUST00000034086	69021	-1
ENSMUST00000028279	9521	1	ENSMUST00000019962	11220	-1	ENSMUST00000021447	102831	-1	ENSMUST00000022728	16537	-1	ENSMUST00000024761	102818	-1	ENSMUST00000026120	1682	-1	ENSMUST00000027766	27897	-1	ENSMUST00000029377	13999	-1	ENSMUST00000030757	53741	-1	ENSMUST00000032309	10081	-1	ENSMUST00000034086	69576	-1
ENSMUST00000050372	20478	1	ENSMUST00000019962	11442	-1	ENSMUST00000021447	105708	-1	ENSMUST00000022728	1659	-1	ENSMUST00000024761	109190	-1	ENSMUST00000026120	1691	-1	ENSMUST00000027766	28008	-1	ENSMUST00000029377	14083	-1	ENSMUST00000030757	5934	-1	ENSMUST00000032309	10284	-1	ENSMUST00000034086	69943	-1
ENSMUST00000050372	22294	1	ENSMUST00000019962	11489	-1	ENSMUST00000021447	110818	-1	ENSMUST00000022728	16889	-1	ENSMUST00000024761	116076	-1	ENSMUST00000026120	182	-1	ENSMUST00000027766	28474	-1	ENSMUST00000029377	14296	-1	ENSMUST00000030757	603	-1	ENSMUST00000032309	11189	-1	ENSMUST00000034086	71504	-1
ENSMUST00000102787	309	1	ENSMUST00000019962	1174	-1	ENSMUST00000021447	11238	-1	ENSMUST00000022728	1689	-1	ENSMUST00000024761	120492	-1	ENSMUST00000026120	1924	-1	ENSMUST00000027766	29258	-1	ENSMUST00000029377	14703	-1	ENSMUST00000030757	7679	-1	ENSMUST00000032309	1153	-1	ENSMUST00000034086	71951	-1
ENSMUST00000102787	851	1	ENSMUST00000019962	1204	-1	ENSMUST00000021447	113036	-1	ENSMUST00000022728	1735	-1	ENSMUST00000024761	129893	-1	ENSMUST00000026120	1931	-1	ENSMUST00000027766	29401	-1	ENSMUST00000029377	14854	-1	ENSMUST00000030757	7884	-1	ENSMUST00000032309	11914	-1	ENSMUST00000034086	8691	-1
ENSMUST00000102787	1872	1	ENSMUST00000019962	1505	-1	ENSMUST00000021447	113549	-1	ENSMUST00000022728	17370	-1	ENSMUST00000024761	130426	-1	ENSMUST00000026120	2000	-1	ENSMUST00000027766	29834	-1	ENSMUST00000029377	15037	-1	ENSMUST00000030757	797	-1	ENSMUST00000032309	12248	-1	ENSMUST00000034086	9198	-1
ENSMUST00000102787	2032	1	ENSMUST00000019962	1715	-1	ENSMUST00000021447	114220	-1	ENSMUST00000022728	18269	-1	ENSMUST00000024761	130916	-1	ENSMUST00000026120	2053	-1	ENSMUST00000027766	3332	-1	ENSMUST00000029377	15119	-1	ENSMUST00000030757	8801	-1	ENSMUST00000032309	12437	-1	ENSMUST00000034090	10321	-1
ENSMUST00000000253	18256	1	ENSMUST00000019962	2057	-1	ENSMUST00000021447	116815	-1	ENSMUST00000022728	18414	-1	ENSMUST00000024761	155769	-1	ENSMUST00000026120	2066	-1	ENSMUST00000027766	3375	-1	ENSMUST00000029377	15392	-1	ENSMUST00000030757	9304	-1	ENSMUST00000032309	12839	-1	ENSMUST00000034090	10354	-1
ENSMUST00000000253	18348	1	ENSMUST00000019962	2267	-1	ENSMUST00000021447	117580	-1	ENSMUST00000022728	19174	-1	ENSMUST00000024761	1583	-1	ENSMUST00000026120	2097	-1	ENSMUST00000027766	357	-1	ENSMUST00000029377	1553	-1	ENSMUST00000030773	10143	-1	ENSMUST00000032309	13010	-1	ENSMUST00000034090	10464	-1
ENSMUST00000000253	18676	1	ENSMUST00000019962	2771	-1	ENSMUST00000021447	122705	-1	ENSMUST00000022728	19370	-1	ENSMUST00000024761	161469	-1	ENSMUST00000026120	2114	-1	ENSMUST00000027766	4134	-1	ENSMUST00000029377	15700	-1	ENSMUST00000030773	10411	-1	ENSMUST00000032309	13051	-1	ENSMUST00000034090	10576	-1
ENSMUST00000054234	73869	1	ENSMUST00000019962	2860	-1	ENSMUST00000021447	130856	-1	ENSMUST00000022728	19470	-1	ENSMUST00000024761	168127	-1	ENSMUST00000026120	2138	-1	ENSMUST00000027766	4170	-1	ENSMUST00000029377	15711	-1	ENSMUST00000030773	1046	-1	ENSMUST00000032309	1318	-1	ENSMUST00000034090	10597	-1
ENSMUST00000054234	73909	1	ENSMUST00000019962	3088	-1	ENSMUST00000021447	132454	-1	ENSMUST00000022728	19495	-1	ENSMUST00000024761	17478	-1	ENSMUST00000026120	222	-1	ENSMUST00000027766	4565	-1	ENSMUST00000029377	16282	-1	ENSMUST00000030773	10564	-1	ENSMUST00000032309	13349	-1	ENSMUST00000034090	11047	-1
ENSMUST00000054234	73833	1	ENSMUST00000019962	3151	-1	ENSMUST00000021447	133324	-1	ENSMUST00000022728	20579	-1	ENSMUST00000024761	182582	-1	ENSMUST00000026120	2267	-1	ENSMUST00000027766	4829	-1	ENSMUST00000029377	19	-1	ENSMUST00000030773	10787	-1	ENSMUST00000032309	14005	-1	ENSMUST00000034090	11230	-1
ENSMUST00000028087	2558	1	ENSMUST00000019962	3162	-1	ENSMUST00000021447	134686	-1	ENSMUST00000022728	20590	-1	ENSMUST00000024761	19024	-1	ENSMUST00000026120	2391	-1	ENSMUST00000027766	5076	-1	ENSMUST00000029377	1904	-1	ENSMUST00000030773	10822	-1	ENSMUST00000032309	14390	-1	ENSMUST00000034090	11914	-1
ENSMUST00000028087	799	1	ENSMUST00000019962	3271	-1	ENSMUST00000021447	135135	-1	ENSMUST00000022728	20777	-1	ENSMUST00000024761	192131	-1	ENSMUST00000026120	2631	-1	ENSMUST00000027766	5123	-1	ENSMUST00000029377	2515	-1	ENSMUST00000030773	10885	-1	ENSMUST00000032309	14674	-1	ENSMUST00000034090	12319	-1
ENSMUST00000068415	4819	1	ENSMUST00000019962	3310	-1	ENSMUST00000021447	135971	-1	ENSMUST00000022728	20833	-1	ENSMUST00000024761	194702	-1	ENSMUST00000026120	2639	-1	ENSMUST00000027766	6203	-1	ENSMUST00000029377	2765	-1	ENSMUST00000030773	10936	-1	ENSMUST00000032309	14918	-1	ENSMUST00000034090	12928	-1
ENSMUST00000068415	4845	1	ENSMUST00000019962	3318	-1	ENSMUST00000021447	136840	-1	ENSMUST00000022728	21175	-1	ENSMUST00000024761	196563	-1	ENSMUST00000026120	2775	-1	ENSMUST00000027766	7035	-1	ENSMUST00000029377	2991	-1	ENSMUST00000030773	11022	-1	ENSMUST00000032309	15336	-1	ENSMUST00000034090	13201	-1
ENSMUST00000068415	5035	1	ENSMUST00000019962	3371	-1	ENSMUST00000021447	138127	-1	ENSMUST00000022728	21724	-1	ENSMUST00000024761	220599	-1	ENSMUST00000026120	2792	-1	ENSMUST00000027766	7506	-1	ENSMUST00000029377	3369	-1	ENSMUST00000030773	11111	-1	ENSMUST00000032309	16360	-1	ENSMUST00000034090	13380	-1
ENSMUST00000068415	5056	1	ENSMUST00000019962	3734	-1	ENSMUST00000021447	138896	-1	ENSMUST00000022728	21937	-1	ENSMUST00000024761	229253	-1	ENSMUST00000026120	2858	-1	ENSMUST00000027766	7972	-1	ENSMUST00000029377	3382	-1	ENSMUST00000030773	11285	-1	ENSMUST00000032309	16920	-1	ENSMUST00000034090	13766	-1
ENSMUST00000068415	5220	1	ENSMUST00000019962	3825	-1	ENSMUST00000021447	141324	-1	ENSMUST00000022728	22017	-1	ENSMUST00000024761	239538	-1	ENSMUST00000026120	2964	-1	ENSMUST00000027766	8170	-1	ENSMUST00000029377	3704	-1	ENSMUST00000030773	11534	-1	ENSMUST00000032309	16961	-1	ENSMUST00000034090	14081	-1
ENSMUST00000068415	13069	1	ENSMUST00000019962	4161	-1	ENSMUST00000021447	16291	-1	ENSMUST00000022728	22108	-1	ENSMUST00000024761	253331	-1	ENSMUST00000026120	3113	-1	ENSMUST00000027766	8282	-1	ENSMUST00000029377	4112	-1	ENSMUST00000030773	11662	-1	ENSMUST00000032309	17543	-1	ENSMUST00000034090	14366	-1
ENSMUST00000068415	13105	1	ENSMUST00000019962	460	-1	ENSMUST00000021447	16503	-1	ENSMUST00000022728	2213	-1	ENSMUST00000024761	268912	-1	ENSMUST00000026120	375	-1	ENSMUST00000027766	8517	-1	ENSMUST00000029377	4228	-1	ENSMUST00000030773	12330	-1	ENSMUST00000032309	17681	-1	ENSMUST00000034090	14654	-1
ENSMUST00000068415	13347	1	ENSMUST00000019962	4945	-1	ENSMUST00000021447	24535	-1	ENSMUST00000022728	22730	-1	ENSMUST00000024761	275004	-1	ENSMUST00000026120	399	-1	ENSMUST00000027768	10814	-1	ENSMUST00000029377	4777	-1	ENSMUST00000030773	12479	-1	ENSMUST00000032309	18079	-1	ENSMUST00000034090	15275	-1
ENSMUST00000063886	85652	1	ENSMUST00000019962	5143	-1	ENSMUST00000021447	26304	-1	ENSMUST00000022728	23416	-1	ENSMUST00000024761	278905	-1	ENSMUST00000026120	431	-1	ENSMUST00000027768	11314	-1	ENSMUST00000029377	4873	-1	ENSMUST00000030773	12618	-1	ENSMUST00000032309	18340	-1	ENSMUST00000034090	15760	-1
ENSMUST00000063886	85708	1	ENSMUST00000019962	5614	-1	ENSMUST00000021447	32704	-1	ENSMUST00000022728	24199	-1	ENSMUST00000024761	289284	-1	ENSMUST00000026120	56	-1	ENSMUST00000027768	1189	-1	ENSMUST00000029377	5295	-1	ENSMUST00000030773	1262	-1	ENSMUST00000032309	18436	-1	ENSMUST00000034090	15869	-1
ENSMUST00000063886	85714	1	ENSMUST00000019962	5899	-1	ENSMUST00000021447	36155	-1	ENSMUST00000022728	24990	-1	ENSMUST00000024761	312465	-1	ENSMUST00000026120	591	-1	ENSMUST00000027768	1237	-1	ENSMUST00000029377	5830	-1	ENSMUST00000030773	12977	-1	ENSMUST00000032309	18620	-1	ENSMUST00000034090	15876	-1
ENSMUST00000063886	85721	1	ENSMUST00000019962	6116	-1	ENSMUST00000021447	38224	-1	ENSMUST00000022728	24997	-1	ENSMUST00000024761	318283	-1	ENSMUST00000026120	83	-1	ENSMUST00000027768	12743	-1	ENSMUST00000029377	6413	-1	ENSMUST00000030773	13139	-1	ENSMUST00000032309	1865	-1	ENSMUST00000034090	16020	-1
ENSMUST00000063886	85790	1	ENSMUST00000019962	6425	-1	ENSMUST00000021447	39137	-1	ENSMUST00000022728	25411	-1	ENSMUST00000024761	320023	-1	ENSMUST00000026122	10549	-1	ENSMUST00000027768	1328	-1	ENSMUST00000029377	6954	-1	ENSMUST00000030773	13349	-1	ENSMUST00000032309	1872	-1	ENSMUST00000034090	16512	-1
ENSMUST00000063886	85847	1	ENSMUST00000019962	6470	-1	ENSMUST00000021447	39182	-1	ENSMUST00000022728	26438	-1	ENSMUST00000024761	329244	-1	ENSMUST00000026122	10935	-1	ENSMUST00000027768	15215	-1	ENSMUST00000029377	750	-1	ENSMUST00000030773	13832	-1	ENSMUST00000032309	1876	-1	ENSMUST00000034090	2818	-1
ENSMUST00000063886	85904	1	ENSMUST00000019962	6513	-1	ENSMUST00000021447	40754	-1	ENSMUST00000022728	2893	-1	ENSMUST00000024761	334103	-1	ENSMUST00000026122	11151	-1	ENSMUST00000027768	15411	-1	ENSMUST00000029377	7510	-1	ENSMUST00000030773	13887	-1	ENSMUST00000032309	19254	-1	ENSMUST00000034090	3019	-1
ENSMUST00000063886	85914	1	ENSMUST00000019962	695	-1	ENSMUST00000021447	40829	-1	ENSMUST00000022728	3119	-1	ENSMUST00000024761	341089	-1	ENSMUST00000026122	11190	-1	ENSMUST00000027768	16014	-1	ENSMUST00000029377	7525	-1	ENSMUST00000030773	14232	-1	ENSMUST00000032309	19376	-1	ENSMUST00000034090	3325	-1
ENSMUST00000063886	86072	1	ENSMUST00000019962	7136	-1	ENSMUST00000021447	42524	-1	ENSMUST00000022728	4070	-1	ENSMUST00000024761	34249	-1	ENSMUST00000026122	11331	-1	ENSMUST00000027768	1691	-1	ENSMUST00000029377	755	-1	ENSMUST00000030773	143	-1	ENSMUST00000032309	19791	-1	ENSMUST00000034090	337	-1
ENSMUST00000063886	88178	1	ENSMUST00000019962	7470	-1	ENSMUST00000021447	44453	-1	ENSMUST00000022728	425	-1	ENSMUST00000024761	342672	-1	ENSMUST00000026122	11490	-1	ENSMUST00000027768	18640	-1	ENSMUST00000029377	7576	-1	ENSMUST00000030773	14551	-1	ENSMUST00000032309	19947	-1	ENSMUST00000034090	3511	-1
ENSMUST00000063886	88481	1	ENSMUST00000019962	7751	-1	ENSMUST00000021447	44579	-1	ENSMUST00000022728	5420	-1	ENSMUST00000024761	349556	-1	ENSMUST00000026122	11666	-1	ENSMUST00000027768	19506	-1	ENSMUST00000029377	7599	-1	ENSMUST00000030773	14637	-1	ENSMUST00000032309	20330	-1	ENSMUST00000034090	3667	-1
ENSMUST00000028098	993	1	ENSMUST00000019962	7765	-1	ENSMUST00000021447	44874	-1	ENSMUST00000022728	5840	-1	ENSMUST00000024761	351620	-1	ENSMUST00000026122	11854	-1	ENSMUST00000027768	21262	-1	ENSMUST00000029377	7744	-1	ENSMUST00000030773	14918	-1	ENSMUST00000032309	21185	-1	ENSMUST00000034090	3831	-1
ENSMUST00000047413	10694	1	ENSMUST00000019962	7979	-1	ENSMUST00000021447	47383	-1	ENSMUST00000022728	6017	-1	ENSMUST00000024761	376217	-1	ENSMUST00000026122	11995	-1	ENSMUST00000027768	22730	-1	ENSMUST00000029377	7829	-1	ENSMUST00000030773	14978	-1	ENSMUST00000032309	21215	-1	ENSMUST00000034090	4033	-1
ENSMUST00000047413	11153	1	ENSMUST00000019962	8039	-1	ENSMUST00000021447	48143	-1	ENSMUST00000022728	6570	-1	ENSMUST00000024761	380036	-1	ENSMUST00000026122	12025	-1	ENSMUST00000027768	23947	-1	ENSMUST00000029377	7927	-1	ENSMUST00000030773	15008	-1	ENSMUST00000032309	21383	-1	ENSMUST00000034090	4055	-1
ENSMUST00000047413	11353	1	ENSMUST00000019962	8146	-1	ENSMUST00000021447	50178	-1	ENSMUST00000022728	7163	-1	ENSMUST00000024761	380494	-1	ENSMUST00000026122	12180	-1	ENSMUST00000027768	25181	-1	ENSMUST00000029377	7951	-1	ENSMUST00000030773	15481	-1	ENSMUST00000032309	2188	-1	ENSMUST00000034090	4139	-1
ENSMUST00000047413	11649	1	ENSMUST00000019962	8377	-1	ENSMUST00000021447	53766	-1	ENSMUST00000022728	7191	-1	ENSMUST00000024761	38281	-1	ENSMUST00000026122	12230	-1	ENSMUST00000027768	27811	-1	ENSMUST00000029377	8236	-1	ENSMUST00000030773	15565	-1	ENSMUST00000032309	22190	-1	ENSMUST00000034090	4299	-1
ENSMUST00000047413	11659	1	ENSMUST00000019962	8552	-1	ENSMUST00000021447	55810	-1	ENSMUST00000022728	7532	-1	ENSMUST00000024761	384270	-1	ENSMUST00000026122	12460	-1	ENSMUST00000027768	32036	-1	ENSMUST00000029377	8693	-1	ENSMUST00000030773	2188	-1	ENSMUST00000032309	22922	-1	ENSMUST00000034090	4553	-1
ENSMUST00000047413	11857	1	ENSMUST00000019962	8872	-1	ENSMUST00000021447	62580	-1	ENSMUST00000022728	7726	-1	ENSMUST00000024761	385701	-1	ENSMUST00000026122	12499	-1	ENSMUST00000027768	32903	-1	ENSMUST00000029377	9201	-1	ENSMUST00000030773	2336	-1	ENSMUST00000032309	23143	-1	ENSMUST00000034090	5170	-1
ENSMUST00000047413	11863	1	ENSMUST00000019962	9063	-1	ENSMUST00000021447	65467	-1	ENSMUST00000022728	7916	-1	ENSMUST00000024761	387595	-1	ENSMUST00000026122	1256	-1	ENSMUST00000027768	33506	-1	ENSMUST00000029377	9223	-1	ENSMUST00000030773	247	-1	ENSMUST00000032309	23195	-1	ENSMUST00000034090	5388	-1
ENSMUST00000047413	33064	1	ENSMUST00000019962	9073	-1	ENSMUST00000021447	66296	-1	ENSMUST00000022728	9383	-1	ENSMUST00000024761	399049	-1	ENSMUST00000026122	1747	-1	ENSMUST00000027768	34689	-1	ENSMUST00000029377	9359	-1	ENSMUST00000030773	2996	-1	ENSMUST00000032309	2329	-1	ENSMUST00000034090	5429	-1
ENSMUST00000047413	33366	1	ENSMUST00000019962	9343	-1	ENSMUST00000021447	72715	-1	ENSMUST00000022728	9646	-1	ENSMUST00000024761	402528	-1	ENSMUST00000026122	1783	-1	ENSMUST00000027768	36352	-1	ENSMUST00000029377	958	-1	ENSMUST00000030773	3748	-1	ENSMUST00000032309	2556	-1	ENSMUST00000034090	5442	-1
ENSMUST00000047413	33389	1	ENSMUST00000019962	9939	-1	ENSMUST00000021447	74339	-1	ENSMUST00000022751	10047	-1	ENSMUST00000024761	403384	-1	ENSMUST00000026122	2234	-1	ENSMUST00000027768	36500	-1	ENSMUST00000029377	9992	-1	ENSMUST00000030773	3887	-1	ENSMUST00000032309	3109	-1	ENSMUST00000034090	6	-1
ENSMUST00000047413	33637	1	ENSMUST00000019974	10265	-1	ENSMUST00000021447	75018	-1	ENSMUST00000022751	10316	-1	ENSMUST00000024761	404907	-1	ENSMUST00000026122	2841	-1	ENSMUST00000027768	36890	-1	ENSMUST00000029388	1109	-1	ENSMUST00000030773	4057	-1	ENSMUST00000032309	4353	-1	ENSMUST00000034090	6508	-1
ENSMUST00000047413	33689	1	ENSMUST00000019974	10337	-1	ENSMUST00000021447	76937	-1	ENSMUST00000022751	10375	-1	ENSMUST00000024761	413966	-1	ENSMUST00000026122	2875	-1	ENSMUST00000027768	37040	-1	ENSMUST00000029388	1174	-1	ENSMUST00000030773	443	-1	ENSMUST00000032309	5065	-1	ENSMUST00000034090	6605	-1
ENSMUST00000092123	85438	1	ENSMUST00000019974	10373	-1	ENSMUST00000021447	78792	-1	ENSMUST00000022751	10755	-1	ENSMUST00000024761	420028	-1	ENSMUST00000026122	2915	-1	ENSMUST00000027768	37199	-1	ENSMUST00000029388	1191	-1	ENSMUST00000030773	4565	-1	ENSMUST00000032309	5302	-1	ENSMUST00000034090	7316	-1
ENSMUST00000092123	97023	1	ENSMUST00000019974	10482	-1	ENSMUST00000021447	80020	-1	ENSMUST00000022751	10961	-1	ENSMUST00000024761	423589	-1	ENSMUST00000026122	2989	-1	ENSMUST00000027768	38016	-1	ENSMUST00000029388	1246	-1	ENSMUST00000030773	4979	-1	ENSMUST00000032309	5924	-1	ENSMUST00000034090	8155	-1
ENSMUST00000092123	97045	1	ENSMUST00000019974	10809	-1	ENSMUST00000021447	81380	-1	ENSMUST00000022751	11356	-1	ENSMUST00000024761	429948	-1	ENSMUST00000026122	3072	-1	ENSMUST00000027768	38732	-1	ENSMUST00000029388	1254	-1	ENSMUST00000030773	5191	-1	ENSMUST00000032309	601	-1	ENSMUST00000034090	8379	-1
ENSMUST00000092123	97096	1	ENSMUST00000019974	10913	-1	ENSMUST00000021447	82220	-1	ENSMUST00000022751	11397	-1	ENSMUST00000024761	430822	-1	ENSMUST00000026122	3399	-1	ENSMUST00000027768	40399	-1	ENSMUST00000029388	1317	-1	ENSMUST00000030773	5441	-1	ENSMUST00000032309	7125	-1	ENSMUST00000034090	8517	-1
ENSMUST00000092123	97176	1	ENSMUST00000019974	1103	-1	ENSMUST00000021447	83885	-1	ENSMUST00000022751	11513	-1	ENSMUST00000024761	43815	-1	ENSMUST00000026122	3414	-1	ENSMUST00000027768	41046	-1	ENSMUST00000029388	1356	-1	ENSMUST00000030773	5470	-1	ENSMUST00000032309	7241	-1	ENSMUST00000034090	8521	-1
ENSMUST00000092123	98462	1	ENSMUST00000019974	11267	-1	ENSMUST00000021447	85855	-1	ENSMUST00000022751	11760	-1	ENSMUST00000024761	439951	-1	ENSMUST00000026122	3514	-1	ENSMUST00000027768	41858	-1	ENSMUST00000029388	1547	-1	ENSMUST00000030773	5931	-1	ENSMUST00000032309	7828	-1	ENSMUST00000034090	8763	-1
ENSMUST00000092123	98617	1	ENSMUST00000019974	11372	-1	ENSMUST00000021447	874	-1	ENSMUST00000022751	11766	-1	ENSMUST00000024761	53619	-1	ENSMUST00000026122	3591	-1	ENSMUST00000027768	45460	-1	ENSMUST00000029388	1683	-1	ENSMUST00000030773	5972	-1	ENSMUST00000032309	8898	-1	ENSMUST00000034090	9034	-1
ENSMUST00000092123	98453	1	ENSMUST00000019974	11561	-1	ENSMUST00000021447	88338	-1	ENSMUST00000022751	11780	-1	ENSMUST00000024761	60875	-1	ENSMUST00000026122	3889	-1	ENSMUST00000027768	45864	-1	ENSMUST00000029388	1876	-1	ENSMUST00000030773	6160	-1	ENSMUST00000032309	9038	-1	ENSMUST00000034090	9436	-1
ENSMUST00000028102	152192	1	ENSMUST00000019974	11649	-1	ENSMUST00000021447	94609	-1	ENSMUST00000022751	12171	-1	ENSMUST00000024761	61206	-1	ENSMUST00000026122	4162	-1	ENSMUST00000027768	46112	-1	ENSMUST00000029388	1916	-1	ENSMUST00000030773	6394	-1	ENSMUST00000032309	923	-1	ENSMUST00000034090	9619	-1
ENSMUST00000028102	152450	1	ENSMUST00000019974	11672	-1	ENSMUST00000021447	9846	-1	ENSMUST00000022751	12409	-1	ENSMUST00000024761	64468	-1	ENSMUST00000026122	4190	-1	ENSMUST00000027768	47734	-1	ENSMUST00000029388	2011	-1	ENSMUST00000030773	6956	-1	ENSMUST00000032322	100057	-1	ENSMUST00000034090	9769	-1
ENSMUST00000028102	152556	1	ENSMUST00000019974	1175	-1	ENSMUST00000021458	107489	-1	ENSMUST00000022751	1264	-1	ENSMUST00000024761	81639	-1	ENSMUST00000026122	4965	-1	ENSMUST00000027768	48439	-1	ENSMUST00000029388	2024	-1	ENSMUST00000030773	7073	-1	ENSMUST00000032322	100159	-1	ENSMUST00000034090	9826	-1
ENSMUST00000028102	152584	1	ENSMUST00000019974	12091	-1	ENSMUST00000021458	107605	-1	ENSMUST00000022751	12826	-1	ENSMUST00000024761	87603	-1	ENSMUST00000026122	5254	-1	ENSMUST00000027768	48583	-1	ENSMUST00000029388	2066	-1	ENSMUST00000030773	740	-1	ENSMUST00000032322	102751	-1	ENSMUST00000034090	9919	-1
ENSMUST00000028103	159955	1	ENSMUST00000019974	12594	-1	ENSMUST00000021458	108480	-1	ENSMUST00000022751	12863	-1	ENSMUST00000024761	88049	-1	ENSMUST00000026122	5783	-1	ENSMUST00000027768	48735	-1	ENSMUST00000029388	2071	-1	ENSMUST00000030773	7538	-1	ENSMUST00000032322	102767	-1	ENSMUST00000034090	9955	-1
ENSMUST00000028103	159970	1	ENSMUST00000019974	12744	-1	ENSMUST00000021458	108737	-1	ENSMUST00000022751	12907	-1	ENSMUST00000024761	92060	-1	ENSMUST00000026122	6017	-1	ENSMUST00000027768	49510	-1	ENSMUST00000029388	2113	-1	ENSMUST00000030773	7731	-1	ENSMUST00000032322	103203	-1	ENSMUST00000034090	9979	-1
ENSMUST00000028103	160090	1	ENSMUST00000019974	13114	-1	ENSMUST00000021458	109141	-1	ENSMUST00000022751	13259	-1	ENSMUST00000024761	97856	-1	ENSMUST00000026122	6232	-1	ENSMUST00000027768	49563	-1	ENSMUST00000029388	2241	-1	ENSMUST00000030773	7901	-1	ENSMUST00000032322	10326	-1	ENSMUST00000034091	10029	-1
ENSMUST00000154545	488	1	ENSMUST00000019974	1423	-1	ENSMUST00000021458	109952	-1	ENSMUST00000022751	13301	-1	ENSMUST00000024779	10135	-1	ENSMUST00000026122	6355	-1	ENSMUST00000027768	50381	-1	ENSMUST00000029388	244	-1	ENSMUST00000030773	8383	-1	ENSMUST00000032322	104505	-1	ENSMUST00000034091	10514	-1
ENSMUST00000154545	500	1	ENSMUST00000019974	160	-1	ENSMUST00000021458	110161	-1	ENSMUST00000022751	1354	-1	ENSMUST00000024779	11001	-1	ENSMUST00000026122	6382	-1	ENSMUST00000027768	50861	-1	ENSMUST00000029388	2517	-1	ENSMUST00000030773	8568	-1	ENSMUST00000032322	10846	-1	ENSMUST00000034091	10562	-1
ENSMUST00000154545	202	1	ENSMUST00000019974	1863	-1	ENSMUST00000021458	111175	-1	ENSMUST00000022751	14368	-1	ENSMUST00000024779	1443	-1	ENSMUST00000026122	7171	-1	ENSMUST00000027768	50925	-1	ENSMUST00000029388	2604	-1	ENSMUST00000030773	8653	-1	ENSMUST00000032322	112618	-1	ENSMUST00000034091	12001	-1
ENSMUST00000112693	37520	1	ENSMUST00000019974	200	-1	ENSMUST00000021458	112246	-1	ENSMUST00000022751	14427	-1	ENSMUST00000024779	14924	-1	ENSMUST00000026122	7328	-1	ENSMUST00000027768	52770	-1	ENSMUST00000029388	2723	-1	ENSMUST00000030773	9941	-1	ENSMUST00000032322	114228	-1	ENSMUST00000034091	12982	-1
ENSMUST00000112693	39197	1	ENSMUST00000019974	2150	-1	ENSMUST00000021458	112258	-1	ENSMUST00000022751	14566	-1	ENSMUST00000024779	15582	-1	ENSMUST00000026122	7342	-1	ENSMUST00000027768	52847	-1	ENSMUST00000029388	2745	-1	ENSMUST00000030775	11710	-1	ENSMUST00000032322	114344	-1	ENSMUST00000034091	13219	-1
ENSMUST00000112693	39215	1	ENSMUST00000019974	2278	-1	ENSMUST00000021458	118713	-1	ENSMUST00000022751	15450	-1	ENSMUST00000024779	18040	-1	ENSMUST00000026122	7427	-1	ENSMUST00000027768	52984	-1	ENSMUST00000029388	2837	-1	ENSMUST00000030775	11720	-1	ENSMUST00000032322	114862	-1	ENSMUST00000034091	13225	-1
ENSMUST00000112693	39239	1	ENSMUST00000019974	2643	-1	ENSMUST00000021458	11943	-1	ENSMUST00000022751	17119	-1	ENSMUST00000024779	18431	-1	ENSMUST00000026122	744	-1	ENSMUST00000027768	53230	-1	ENSMUST00000029388	2900	-1	ENSMUST00000030775	12346	-1	ENSMUST00000032322	116313	-1	ENSMUST00000034091	13788	-1
ENSMUST00000112693	39562	1	ENSMUST00000019974	3024	-1	ENSMUST00000021458	119796	-1	ENSMUST00000022751	1771	-1	ENSMUST00000024779	18886	-1	ENSMUST00000026122	7539	-1	ENSMUST00000027768	53389	-1	ENSMUST00000029388	2916	-1	ENSMUST00000030775	14104	-1	ENSMUST00000032322	116425	-1	ENSMUST00000034091	16109	-1
ENSMUST00000112693	39750	1	ENSMUST00000019974	321	-1	ENSMUST00000021458	120654	-1	ENSMUST00000022751	1844	-1	ENSMUST00000024779	18962	-1	ENSMUST00000026122	7863	-1	ENSMUST00000027768	54494	-1	ENSMUST00000029388	3061	-1	ENSMUST00000030775	14256	-1	ENSMUST00000032322	117538	-1	ENSMUST00000034091	16735	-1
ENSMUST00000112693	39782	1	ENSMUST00000019974	3902	-1	ENSMUST00000021458	120766	-1	ENSMUST00000022751	19249	-1	ENSMUST00000024779	19030	-1	ENSMUST00000026122	7943	-1	ENSMUST00000027768	55773	-1	ENSMUST00000029388	3095	-1	ENSMUST00000030775	14310	-1	ENSMUST00000032322	119266	-1	ENSMUST00000034091	17109	-1
ENSMUST00000112693	39808	1	ENSMUST00000019974	3911	-1	ENSMUST00000021458	12260	-1	ENSMUST00000022751	19528	-1	ENSMUST00000024779	20753	-1	ENSMUST00000026122	8160	-1	ENSMUST00000027768	55992	-1	ENSMUST00000029388	3214	-1	ENSMUST00000030775	15581	-1	ENSMUST00000032322	11964	-1	ENSMUST00000034091	19915	-1
ENSMUST00000112693	39840	1	ENSMUST00000019974	3999	-1	ENSMUST00000021458	122986	-1	ENSMUST00000022751	19746	-1	ENSMUST00000024779	21244	-1	ENSMUST00000026122	8383	-1	ENSMUST00000027768	58408	-1	ENSMUST00000029388	3465	-1	ENSMUST00000030775	15825	-1	ENSMUST00000032322	12175	-1	ENSMUST00000034091	2011	-1
ENSMUST00000112693	48449	1	ENSMUST00000019974	4816	-1	ENSMUST00000021458	123863	-1	ENSMUST00000022751	20160	-1	ENSMUST00000024779	21430	-1	ENSMUST00000026122	8631	-1	ENSMUST00000027768	58674	-1	ENSMUST00000029388	3515	-1	ENSMUST00000030775	16910	-1	ENSMUST00000032322	12884	-1	ENSMUST00000034091	20452	-1
ENSMUST00000036541	4150	1	ENSMUST00000019974	4961	-1	ENSMUST00000021458	124797	-1	ENSMUST00000022751	20230	-1	ENSMUST00000024779	22454	-1	ENSMUST00000026122	8884	-1	ENSMUST00000027768	6153	-1	ENSMUST00000029388	3571	-1	ENSMUST00000030775	17448	-1	ENSMUST00000032322	1383	-1	ENSMUST00000034091	20667	-1
ENSMUST00000036541	4235	1	ENSMUST00000019974	5151	-1	ENSMUST00000021458	126349	-1	ENSMUST00000022751	213	-1	ENSMUST00000024779	22857	-1	ENSMUST00000026122	8913	-1	ENSMUST00000027768	6450	-1	ENSMUST00000029388	512	-1	ENSMUST00000030775	18590	-1	ENSMUST00000032322	16277	-1	ENSMUST00000034091	20950	-1
ENSMUST00000036541	4387	1	ENSMUST00000019974	5208	-1	ENSMUST00000021458	126521	-1	ENSMUST00000022751	21557	-1	ENSMUST00000024779	22874	-1	ENSMUST00000026122	9035	-1	ENSMUST00000027768	6825	-1	ENSMUST00000029388	596	-1	ENSMUST00000030775	19688	-1	ENSMUST00000032322	19364	-1	ENSMUST00000034091	21295	-1
ENSMUST00000036541	4410	1	ENSMUST00000019974	5245	-1	ENSMUST00000021458	127020	-1	ENSMUST00000022751	22339	-1	ENSMUST00000024779	22926	-1	ENSMUST00000026122	9073	-1	ENSMUST00000027768	7027	-1	ENSMUST00000029388	654	-1	ENSMUST00000030775	21010	-1	ENSMUST00000032322	29717	-1	ENSMUST00000034091	23433	-1
ENSMUST00000036541	4203	1	ENSMUST00000019974	5623	-1	ENSMUST00000021458	129331	-1	ENSMUST00000022751	22794	-1	ENSMUST00000024779	23655	-1	ENSMUST00000026122	9221	-1	ENSMUST00000027768	7335	-1	ENSMUST00000029402	10325	-1	ENSMUST00000030775	22157	-1	ENSMUST00000032322	30480	-1	ENSMUST00000034091	25433	-1
ENSMUST00000036541	4335	1	ENSMUST00000019974	5653	-1	ENSMUST00000021458	129526	-1	ENSMUST00000022751	2311	-1	ENSMUST00000024779	23799	-1	ENSMUST00000026122	9299	-1	ENSMUST00000027768	7557	-1	ENSMUST00000029402	10475	-1	ENSMUST00000030775	22551	-1	ENSMUST00000032322	30842	-1	ENSMUST00000034091	26422	-1
ENSMUST00000049483	274	1	ENSMUST00000019974	571	-1	ENSMUST00000021458	141	-1	ENSMUST00000022751	23892	-1	ENSMUST00000024779	25000	-1	ENSMUST00000026122	9596	-1	ENSMUST00000027768	9203	-1	ENSMUST00000029402	11290	-1	ENSMUST00000030775	22794	-1	ENSMUST00000032322	38870	-1	ENSMUST00000034091	27433	-1
ENSMUST00000049483	298	1	ENSMUST00000019974	5811	-1	ENSMUST00000021458	15811	-1	ENSMUST00000022751	24334	-1	ENSMUST00000024779	25454	-1	ENSMUST00000026122	9667	-1	ENSMUST00000027780	10316	-1	ENSMUST00000029402	1185	-1	ENSMUST00000030775	23132	-1	ENSMUST00000032322	40031	-1	ENSMUST00000034091	29136	-1
ENSMUST00000076313	4341	1	ENSMUST00000019974	5818	-1	ENSMUST00000021458	19579	-1	ENSMUST00000022751	24440	-1	ENSMUST00000024779	25796	-1	ENSMUST00000026129	1053	-1	ENSMUST00000027780	11148	-1	ENSMUST00000029402	11899	-1	ENSMUST00000030775	2339	-1	ENSMUST00000032322	43773	-1	ENSMUST00000034091	29539	-1
ENSMUST00000100089	386	1	ENSMUST00000019974	6188	-1	ENSMUST00000021458	20044	-1	ENSMUST00000022751	2578	-1	ENSMUST00000024779	26285	-1	ENSMUST00000026129	1547	-1	ENSMUST00000027780	1139	-1	ENSMUST00000029402	13422	-1	ENSMUST00000030775	23476	-1	ENSMUST00000032322	44892	-1	ENSMUST00000034091	29923	-1
ENSMUST00000100089	629	1	ENSMUST00000019974	6246	-1	ENSMUST00000021458	23671	-1	ENSMUST00000022751	25900	-1	ENSMUST00000024779	28839	-1	ENSMUST00000026129	1972	-1	ENSMUST00000027780	12897	-1	ENSMUST00000029402	13626	-1	ENSMUST00000030775	23812	-1	ENSMUST00000032322	4522	-1	ENSMUST00000034091	31978	-1
ENSMUST00000100089	796	1	ENSMUST00000019974	6507	-1	ENSMUST00000021458	24106	-1	ENSMUST00000022751	25924	-1	ENSMUST00000024779	29049	-1	ENSMUST00000026129	2203	-1	ENSMUST00000027780	13096	-1	ENSMUST00000029402	13632	-1	ENSMUST00000030775	24931	-1	ENSMUST00000032322	45237	-1	ENSMUST00000034091	32740	-1
ENSMUST00000100089	1354	1	ENSMUST00000019974	6639	-1	ENSMUST00000021458	32406	-1	ENSMUST00000022751	26780	-1	ENSMUST00000024779	29635	-1	ENSMUST00000026129	2266	-1	ENSMUST00000027780	13375	-1	ENSMUST00000029402	13663	-1	ENSMUST00000030775	24991	-1	ENSMUST00000032322	47229	-1	ENSMUST00000034091	33124	-1
ENSMUST00000100089	1371	1	ENSMUST00000019974	72	-1	ENSMUST00000021458	3329	-1	ENSMUST00000022751	28431	-1	ENSMUST00000024779	30092	-1	ENSMUST00000026129	2316	-1	ENSMUST00000027780	1354	-1	ENSMUST00000029402	13794	-1	ENSMUST00000030775	25244	-1	ENSMUST00000032322	52575	-1	ENSMUST00000034091	33449	-1
ENSMUST00000096563	3716	1	ENSMUST00000019974	7730	-1	ENSMUST00000021458	41559	-1	ENSMUST00000022751	28619	-1	ENSMUST00000024779	30293	-1	ENSMUST00000026129	2370	-1	ENSMUST00000027780	13577	-1	ENSMUST00000029402	13927	-1	ENSMUST00000030775	25477	-1	ENSMUST00000032322	53112	-1	ENSMUST00000034091	33672	-1
ENSMUST00000096563	4304	1	ENSMUST00000019974	7768	-1	ENSMUST00000021458	42142	-1	ENSMUST00000022751	2923	-1	ENSMUST00000024779	33655	-1	ENSMUST00000026129	2629	-1	ENSMUST00000027780	13631	-1	ENSMUST00000029402	14407	-1	ENSMUST00000030775	25858	-1	ENSMUST00000032322	53839	-1	ENSMUST00000034091	33677	-1
ENSMUST00000067101	159154	1	ENSMUST00000019974	794	-1	ENSMUST00000021458	42624	-1	ENSMUST00000022751	30648	-1	ENSMUST00000024779	33890	-1	ENSMUST00000026129	2708	-1	ENSMUST00000027780	13887	-1	ENSMUST00000029402	15185	-1	ENSMUST00000030775	2629	-1	ENSMUST00000032322	54800	-1	ENSMUST00000034091	33856	-1
ENSMUST00000067101	159415	1	ENSMUST00000019974	8492	-1	ENSMUST00000021458	42867	-1	ENSMUST00000022751	30748	-1	ENSMUST00000024779	34004	-1	ENSMUST00000026129	299	-1	ENSMUST00000027780	14933	-1	ENSMUST00000029402	15793	-1	ENSMUST00000030775	26462	-1	ENSMUST00000032322	56154	-1	ENSMUST00000034091	34235	-1
ENSMUST00000067101	159552	1	ENSMUST00000019974	8759	-1	ENSMUST00000021458	47555	-1	ENSMUST00000022751	32091	-1	ENSMUST00000024779	34997	-1	ENSMUST00000026129	3184	-1	ENSMUST00000027780	15248	-1	ENSMUST00000029402	15910	-1	ENSMUST00000030775	28324	-1	ENSMUST00000032322	58475	-1	ENSMUST00000034091	34806	-1
ENSMUST00000028166	1049	1	ENSMUST00000019974	9274	-1	ENSMUST00000021458	49546	-1	ENSMUST00000022751	32637	-1	ENSMUST00000024779	35747	-1	ENSMUST00000026129	3467	-1	ENSMUST00000027780	15622	-1	ENSMUST00000029402	16303	-1	ENSMUST00000030775	2912	-1	ENSMUST00000032322	61839	-1	ENSMUST00000034091	35361	-1
ENSMUST00000028166	1073	1	ENSMUST00000019974	9402	-1	ENSMUST00000021458	49761	-1	ENSMUST00000022751	4171	-1	ENSMUST00000024779	36113	-1	ENSMUST00000026129	3493	-1	ENSMUST00000027780	17036	-1	ENSMUST00000029402	16412	-1	ENSMUST00000030775	29412	-1	ENSMUST00000032322	66617	-1	ENSMUST00000034091	35526	-1
ENSMUST00000028166	1151	1	ENSMUST00000019974	949	-1	ENSMUST00000021458	52069	-1	ENSMUST00000022751	4544	-1	ENSMUST00000024779	36122	-1	ENSMUST00000026129	3501	-1	ENSMUST00000027780	17406	-1	ENSMUST00000029402	16540	-1	ENSMUST00000030775	29910	-1	ENSMUST00000032322	67434	-1	ENSMUST00000034091	35632	-1
ENSMUST00000028166	1343	1	ENSMUST00000019974	953	-1	ENSMUST00000021458	52371	-1	ENSMUST00000022751	4657	-1	ENSMUST00000024779	36657	-1	ENSMUST00000026129	3543	-1	ENSMUST00000027780	17592	-1	ENSMUST00000029402	16785	-1	ENSMUST00000030775	30709	-1	ENSMUST00000032322	73335	-1	ENSMUST00000034091	36421	-1
ENSMUST00000028166	1354	1	ENSMUST00000019974	9794	-1	ENSMUST00000021458	53945	-1	ENSMUST00000022751	5408	-1	ENSMUST00000024779	37777	-1	ENSMUST00000026129	3554	-1	ENSMUST00000027780	19096	-1	ENSMUST00000029402	17123	-1	ENSMUST00000030775	30890	-1	ENSMUST00000032322	74186	-1	ENSMUST00000034091	36640	-1
ENSMUST00000028166	1475	1	ENSMUST00000019974	9811	-1	ENSMUST00000021458	54993	-1	ENSMUST00000022751	5734	-1	ENSMUST00000024779	39486	-1	ENSMUST00000026129	3570	-1	ENSMUST00000027780	19349	-1	ENSMUST00000029402	18000	-1	ENSMUST00000030775	31618	-1	ENSMUST00000032322	74539	-1	ENSMUST00000034091	37305	-1
ENSMUST00000028166	1514	1	ENSMUST00000019982	1076	-1	ENSMUST00000021458	5802	-1	ENSMUST00000022751	5908	-1	ENSMUST00000024779	40056	-1	ENSMUST00000026129	3637	-1	ENSMUST00000027780	19373	-1	ENSMUST00000029402	18169	-1	ENSMUST00000030775	34346	-1	ENSMUST00000032322	7861	-1	ENSMUST00000034091	37861	-1
ENSMUST00000028166	1579	1	ENSMUST00000019982	1105	-1	ENSMUST00000021458	58261	-1	ENSMUST00000022751	6359	-1	ENSMUST00000024779	4078	-1	ENSMUST00000026129	3838	-1	ENSMUST00000027780	19645	-1	ENSMUST00000029402	18239	-1	ENSMUST00000030775	35249	-1	ENSMUST00000032322	80111	-1	ENSMUST00000034091	383	-1
ENSMUST00000028166	5356	1	ENSMUST00000019982	1571	-1	ENSMUST00000021458	62591	-1	ENSMUST00000022751	6455	-1	ENSMUST00000024779	42420	-1	ENSMUST00000026129	3887	-1	ENSMUST00000027780	19675	-1	ENSMUST00000029402	18271	-1	ENSMUST00000030775	35685	-1	ENSMUST00000032322	82054	-1	ENSMUST00000034091	38924	-1
ENSMUST00000112618	132224	1	ENSMUST00000019982	1575	-1	ENSMUST00000021458	62756	-1	ENSMUST00000022751	6572	-1	ENSMUST00000024779	42883	-1	ENSMUST00000026129	3988	-1	ENSMUST00000027780	19804	-1	ENSMUST00000029402	18494	-1	ENSMUST00000030775	35710	-1	ENSMUST00000032322	82201	-1	ENSMUST00000034091	40274	-1
ENSMUST00000112618	129316	1	ENSMUST00000019982	1636	-1	ENSMUST00000021458	69769	-1	ENSMUST00000022751	6773	-1	ENSMUST00000024779	4369	-1	ENSMUST00000026129	4545	-1	ENSMUST00000027780	2022	-1	ENSMUST00000029402	19048	-1	ENSMUST00000030775	36651	-1	ENSMUST00000032322	84192	-1	ENSMUST00000034091	40547	-1
ENSMUST00000090935	328	1	ENSMUST00000019982	1927	-1	ENSMUST00000021458	7753	-1	ENSMUST00000022751	7364	-1	ENSMUST00000024779	44229	-1	ENSMUST00000026129	4693	-1	ENSMUST00000027780	20248	-1	ENSMUST00000029402	1912	-1	ENSMUST00000030775	36732	-1	ENSMUST00000032322	88237	-1	ENSMUST00000034091	41095	-1
ENSMUST00000090935	529	1	ENSMUST00000019982	193	-1	ENSMUST00000021458	78622	-1	ENSMUST00000022751	7452	-1	ENSMUST00000024779	45870	-1	ENSMUST00000026129	4704	-1	ENSMUST00000027780	20929	-1	ENSMUST00000029402	19380	-1	ENSMUST00000030775	37288	-1	ENSMUST00000032322	88440	-1	ENSMUST00000034091	4247	-1
ENSMUST00000090935	620	1	ENSMUST00000019982	1953	-1	ENSMUST00000021458	80039	-1	ENSMUST00000022751	9793	-1	ENSMUST00000024779	46705	-1	ENSMUST00000026129	4744	-1	ENSMUST00000027780	2139	-1	ENSMUST00000029402	2009	-1	ENSMUST00000030775	37517	-1	ENSMUST00000032322	90143	-1	ENSMUST00000034091	43784	-1
ENSMUST00000090935	865	1	ENSMUST00000019982	2031	-1	ENSMUST00000021458	82905	-1	ENSMUST00000022782	1086	-1	ENSMUST00000024779	46873	-1	ENSMUST00000026129	4796	-1	ENSMUST00000027780	21400	-1	ENSMUST00000029402	20228	-1	ENSMUST00000030775	38340	-1	ENSMUST00000032322	90226	-1	ENSMUST00000034091	46254	-1
ENSMUST00000090935	883	1	ENSMUST00000019982	2195	-1	ENSMUST00000021458	84114	-1	ENSMUST00000022782	1224	-1	ENSMUST00000024779	47465	-1	ENSMUST00000026129	4822	-1	ENSMUST00000027780	21659	-1	ENSMUST00000029402	20537	-1	ENSMUST00000030775	38427	-1	ENSMUST00000032322	90434	-1	ENSMUST00000034091	47135	-1
ENSMUST00000090935	1149	1	ENSMUST00000019982	2348	-1	ENSMUST00000021458	90211	-1	ENSMUST00000022782	1315	-1	ENSMUST00000024779	48689	-1	ENSMUST00000026129	5016	-1	ENSMUST00000027780	21818	-1	ENSMUST00000029402	21046	-1	ENSMUST00000030775	38616	-1	ENSMUST00000032322	91168	-1	ENSMUST00000034091	49843	-1
ENSMUST00000090935	928	1	ENSMUST00000019982	2499	-1	ENSMUST00000021458	91494	-1	ENSMUST00000022782	1714	-1	ENSMUST00000024779	49281	-1	ENSMUST00000026129	5127	-1	ENSMUST00000027780	21832	-1	ENSMUST00000029402	22072	-1	ENSMUST00000030775	38757	-1	ENSMUST00000032322	91945	-1	ENSMUST00000034091	51821	-1
ENSMUST00000169005	147310	1	ENSMUST00000019982	286	-1	ENSMUST00000021458	93787	-1	ENSMUST00000022782	1732	-1	ENSMUST00000024779	4933	-1	ENSMUST00000026129	5260	-1	ENSMUST00000027780	2331	-1	ENSMUST00000029402	2219	-1	ENSMUST00000030775	41267	-1	ENSMUST00000032322	92950	-1	ENSMUST00000034091	51827	-1
ENSMUST00000169005	147441	1	ENSMUST00000019982	2915	-1	ENSMUST00000021458	93958	-1	ENSMUST00000022782	1832	-1	ENSMUST00000024779	51882	-1	ENSMUST00000026129	5466	-1	ENSMUST00000027780	23350	-1	ENSMUST00000029402	2232	-1	ENSMUST00000030775	41326	-1	ENSMUST00000032322	98235	-1	ENSMUST00000034091	52779	-1
ENSMUST00000169005	147522	1	ENSMUST00000019982	3091	-1	ENSMUST00000021458	95018	-1	ENSMUST00000022782	1908	-1	ENSMUST00000024779	51965	-1	ENSMUST00000026129	5512	-1	ENSMUST00000027780	23919	-1	ENSMUST00000029402	2685	-1	ENSMUST00000030775	44092	-1	ENSMUST00000032322	98962	-1	ENSMUST00000034091	5951	-1
ENSMUST00000169005	147585	1	ENSMUST00000019982	3126	-1	ENSMUST00000021458	96013	-1	ENSMUST00000022782	2127	-1	ENSMUST00000024779	52872	-1	ENSMUST00000026129	5727	-1	ENSMUST00000027780	25243	-1	ENSMUST00000029402	3076	-1	ENSMUST00000030775	44326	-1	ENSMUST00000032322	99669	-1	ENSMUST00000034091	6188	-1
ENSMUST00000169005	147624	1	ENSMUST00000019982	3335	-1	ENSMUST00000021458	96102	-1	ENSMUST00000022782	2240	-1	ENSMUST00000024779	53372	-1	ENSMUST00000026129	5755	-1	ENSMUST00000027780	25428	-1	ENSMUST00000029402	3281	-1	ENSMUST00000030775	44405	-1	ENSMUST00000032322	99957	-1	ENSMUST00000034091	6914	-1
ENSMUST00000169005	193513	1	ENSMUST00000019982	353	-1	ENSMUST00000021458	96333	-1	ENSMUST00000022782	2502	-1	ENSMUST00000024779	53765	-1	ENSMUST00000026129	5854	-1	ENSMUST00000027780	2569	-1	ENSMUST00000029402	3369	-1	ENSMUST00000030775	44844	-1	ENSMUST00000032335	10212	-1	ENSMUST00000034091	7436	-1
ENSMUST00000169005	193529	1	ENSMUST00000019982	3565	-1	ENSMUST00000021458	97375	-1	ENSMUST00000022782	2775	-1	ENSMUST00000024779	54763	-1	ENSMUST00000026129	5869	-1	ENSMUST00000027780	25760	-1	ENSMUST00000029402	3411	-1	ENSMUST00000030775	46914	-1	ENSMUST00000032335	11010	-1	ENSMUST00000034091	843	-1
ENSMUST00000169005	194145	1	ENSMUST00000019982	3572	-1	ENSMUST00000021458	98713	-1	ENSMUST00000022782	2798	-1	ENSMUST00000024779	5534	-1	ENSMUST00000026129	6105	-1	ENSMUST00000027780	25845	-1	ENSMUST00000029402	4638	-1	ENSMUST00000030775	47318	-1	ENSMUST00000032335	12083	-1	ENSMUST00000034091	9105	-1
ENSMUST00000169005	194184	1	ENSMUST00000019982	3921	-1	ENSMUST00000021458	99893	-1	ENSMUST00000022782	2862	-1	ENSMUST00000024779	6418	-1	ENSMUST00000026129	6488	-1	ENSMUST00000027780	26757	-1	ENSMUST00000029402	4738	-1	ENSMUST00000030775	48023	-1	ENSMUST00000032335	12386	-1	ENSMUST00000034093	1029	-1
ENSMUST00000169005	193457	1	ENSMUST00000019982	4164	-1	ENSMUST00000021466	10329	-1	ENSMUST00000022782	3015	-1	ENSMUST00000024779	7559	-1	ENSMUST00000026129	6622	-1	ENSMUST00000027780	26889	-1	ENSMUST00000029402	475	-1	ENSMUST00000030775	49269	-1	ENSMUST00000032335	12802	-1	ENSMUST00000034093	10859	-1
ENSMUST00000169005	193503	1	ENSMUST00000019982	4248	-1	ENSMUST00000021466	11716	-1	ENSMUST00000022782	3061	-1	ENSMUST00000024779	7602	-1	ENSMUST00000026129	6783	-1	ENSMUST00000027780	26970	-1	ENSMUST00000029402	4814	-1	ENSMUST00000030775	49564	-1	ENSMUST00000032335	1565	-1	ENSMUST00000034093	11240	-1
ENSMUST00000037526	231049	1	ENSMUST00000019982	4367	-1	ENSMUST00000021466	16278	-1	ENSMUST00000022782	3475	-1	ENSMUST00000024779	9436	-1	ENSMUST00000026129	6904	-1	ENSMUST00000027780	412	-1	ENSMUST00000029402	5380	-1	ENSMUST00000030775	50619	-1	ENSMUST00000032335	1776	-1	ENSMUST00000034093	13849	-1
ENSMUST00000112550	62751	1	ENSMUST00000019982	4416	-1	ENSMUST00000021466	16809	-1	ENSMUST00000022782	3497	-1	ENSMUST00000024779	9509	-1	ENSMUST00000026129	7058	-1	ENSMUST00000027780	4273	-1	ENSMUST00000029402	5873	-1	ENSMUST00000030775	5115	-1	ENSMUST00000032335	21914	-1	ENSMUST00000034093	14175	-1
ENSMUST00000112550	62769	1	ENSMUST00000019982	4627	-1	ENSMUST00000021466	19476	-1	ENSMUST00000022782	3736	-1	ENSMUST00000024779	996	-1	ENSMUST00000026129	7120	-1	ENSMUST00000027780	4396	-1	ENSMUST00000029402	5906	-1	ENSMUST00000030775	5426	-1	ENSMUST00000032335	25390	-1	ENSMUST00000034093	14224	-1
ENSMUST00000112550	62779	1	ENSMUST00000019982	4811	-1	ENSMUST00000021466	20035	-1	ENSMUST00000022782	3956	-1	ENSMUST00000024783	1010	-1	ENSMUST00000026129	750	-1	ENSMUST00000027780	4479	-1	ENSMUST00000029402	5939	-1	ENSMUST00000030775	6686	-1	ENSMUST00000032335	25869	-1	ENSMUST00000034093	15075	-1
ENSMUST00000028347	1211	1	ENSMUST00000019982	4856	-1	ENSMUST00000021466	21164	-1	ENSMUST00000022782	3966	-1	ENSMUST00000024783	10383	-1	ENSMUST00000026129	7516	-1	ENSMUST00000027780	4770	-1	ENSMUST00000029402	6212	-1	ENSMUST00000030775	8328	-1	ENSMUST00000032335	30445	-1	ENSMUST00000034093	15409	-1
ENSMUST00000028347	1221	1	ENSMUST00000019982	501	-1	ENSMUST00000021466	25173	-1	ENSMUST00000022782	4129	-1	ENSMUST00000024783	10804	-1	ENSMUST00000026129	7520	-1	ENSMUST00000027780	5722	-1	ENSMUST00000029402	6799	-1	ENSMUST00000030775	8750	-1	ENSMUST00000032335	3252	-1	ENSMUST00000034093	1731	-1
ENSMUST00000112494	56801	1	ENSMUST00000019982	5129	-1	ENSMUST00000021466	26114	-1	ENSMUST00000022782	4330	-1	ENSMUST00000024783	10817	-1	ENSMUST00000026129	7736	-1	ENSMUST00000027780	6013	-1	ENSMUST00000029402	6896	-1	ENSMUST00000030775	9881	-1	ENSMUST00000032335	33213	-1	ENSMUST00000034093	17772	-1
ENSMUST00000112494	56807	1	ENSMUST00000019982	5259	-1	ENSMUST00000021466	27299	-1	ENSMUST00000022782	4655	-1	ENSMUST00000024783	10826	-1	ENSMUST00000026129	794	-1	ENSMUST00000027780	6136	-1	ENSMUST00000029402	700	-1	ENSMUST00000030795	10113	-1	ENSMUST00000032335	34707	-1	ENSMUST00000034093	18557	-1
ENSMUST00000112494	56909	1	ENSMUST00000019982	5522	-1	ENSMUST00000021466	27843	-1	ENSMUST00000022782	4773	-1	ENSMUST00000024783	11011	-1	ENSMUST00000026129	898	-1	ENSMUST00000027780	6203	-1	ENSMUST00000029402	8042	-1	ENSMUST00000030795	10210	-1	ENSMUST00000032335	36906	-1	ENSMUST00000034093	19691	-1
ENSMUST00000112494	56938	1	ENSMUST00000019982	5756	-1	ENSMUST00000021466	28243	-1	ENSMUST00000022782	4977	-1	ENSMUST00000024783	11019	-1	ENSMUST00000026154	10061	-1	ENSMUST00000027780	6419	-1	ENSMUST00000029402	8435	-1	ENSMUST00000030795	10240	-1	ENSMUST00000032335	37751	-1	ENSMUST00000034093	20638	-1
ENSMUST00000112494	56906	1	ENSMUST00000019982	5849	-1	ENSMUST00000021466	28747	-1	ENSMUST00000022782	4992	-1	ENSMUST00000024783	11951	-1	ENSMUST00000026154	10071	-1	ENSMUST00000027780	7722	-1	ENSMUST00000029402	8557	-1	ENSMUST00000030795	10478	-1	ENSMUST00000032335	38163	-1	ENSMUST00000034093	20884	-1
ENSMUST00000112494	56918	1	ENSMUST00000019982	5988	-1	ENSMUST00000021466	29943	-1	ENSMUST00000022782	5026	-1	ENSMUST00000024783	1199	-1	ENSMUST00000026154	10121	-1	ENSMUST00000027780	7954	-1	ENSMUST00000029402	9136	-1	ENSMUST00000030795	10902	-1	ENSMUST00000032335	38318	-1	ENSMUST00000034093	21670	-1
ENSMUST00000112494	56998	1	ENSMUST00000019982	6160	-1	ENSMUST00000021466	31517	-1	ENSMUST00000022782	5325	-1	ENSMUST00000024783	12000	-1	ENSMUST00000026154	10343	-1	ENSMUST00000027780	8029	-1	ENSMUST00000029402	9561	-1	ENSMUST00000030795	1110	-1	ENSMUST00000032335	38394	-1	ENSMUST00000034093	24096	-1
ENSMUST00000048934	209	1	ENSMUST00000019982	6226	-1	ENSMUST00000021466	31917	-1	ENSMUST00000022782	5576	-1	ENSMUST00000024783	1316	-1	ENSMUST00000026154	10374	-1	ENSMUST00000027780	8610	-1	ENSMUST00000029419	113342	-1	ENSMUST00000030795	11120	-1	ENSMUST00000032335	39365	-1	ENSMUST00000034093	24318	-1
ENSMUST00000048934	433	1	ENSMUST00000019982	6337	-1	ENSMUST00000021466	32001	-1	ENSMUST00000022782	5817	-1	ENSMUST00000024783	1614	-1	ENSMUST00000026154	1039	-1	ENSMUST00000027780	879	-1	ENSMUST00000029419	115709	-1	ENSMUST00000030795	11584	-1	ENSMUST00000032335	4031	-1	ENSMUST00000034093	24481	-1
ENSMUST00000048934	452	1	ENSMUST00000019982	6341	-1	ENSMUST00000021466	32964	-1	ENSMUST00000022782	5944	-1	ENSMUST00000024783	1659	-1	ENSMUST00000026154	10394	-1	ENSMUST00000027780	9431	-1	ENSMUST00000029419	116315	-1	ENSMUST00000030795	11749	-1	ENSMUST00000032335	41191	-1	ENSMUST00000034093	24511	-1
ENSMUST00000048934	473	1	ENSMUST00000019982	642	-1	ENSMUST00000021466	33265	-1	ENSMUST00000022782	6091	-1	ENSMUST00000024783	1774	-1	ENSMUST00000026154	10473	-1	ENSMUST00000027780	9629	-1	ENSMUST00000029419	118663	-1	ENSMUST00000030795	1193	-1	ENSMUST00000032335	42841	-1	ENSMUST00000034093	2524	-1
ENSMUST00000048934	7421	1	ENSMUST00000019982	6465	-1	ENSMUST00000021466	34395	-1	ENSMUST00000022782	6112	-1	ENSMUST00000024783	1849	-1	ENSMUST00000026154	1536	-1	ENSMUST00000027792	1427	-1	ENSMUST00000029419	119865	-1	ENSMUST00000030795	12050	-1	ENSMUST00000032335	43197	-1	ENSMUST00000034093	25746	-1
ENSMUST00000048934	7745	1	ENSMUST00000019982	6864	-1	ENSMUST00000021466	34615	-1	ENSMUST00000022782	6271	-1	ENSMUST00000024783	1877	-1	ENSMUST00000026154	1648	-1	ENSMUST00000027792	2053	-1	ENSMUST00000029419	120079	-1	ENSMUST00000030795	1689	-1	ENSMUST00000032335	45185	-1	ENSMUST00000034093	26256	-1
ENSMUST00000048934	7760	1	ENSMUST00000019982	6877	-1	ENSMUST00000021466	34717	-1	ENSMUST00000022782	6494	-1	ENSMUST00000024783	2002	-1	ENSMUST00000026154	1701	-1	ENSMUST00000027792	2065	-1	ENSMUST00000029419	124929	-1	ENSMUST00000030795	1699	-1	ENSMUST00000032335	46209	-1	ENSMUST00000034093	27326	-1
ENSMUST00000048934	7925	1	ENSMUST00000019982	6893	-1	ENSMUST00000021466	34814	-1	ENSMUST00000022782	6524	-1	ENSMUST00000024783	2303	-1	ENSMUST00000026154	1806	-1	ENSMUST00000027792	2078	-1	ENSMUST00000029419	125059	-1	ENSMUST00000030795	1950	-1	ENSMUST00000032335	47320	-1	ENSMUST00000034093	29758	-1
ENSMUST00000075052	1271	1	ENSMUST00000019982	691	-1	ENSMUST00000021466	3597	-1	ENSMUST00000022782	6577	-1	ENSMUST00000024783	244	-1	ENSMUST00000026154	1978	-1	ENSMUST00000027792	216	-1	ENSMUST00000029419	131363	-1	ENSMUST00000030795	2122	-1	ENSMUST00000032335	48105	-1	ENSMUST00000034093	3037	-1
ENSMUST00000075052	84075	1	ENSMUST00000019982	716	-1	ENSMUST00000021466	36523	-1	ENSMUST00000022782	6672	-1	ENSMUST00000024783	2593	-1	ENSMUST00000026154	2048	-1	ENSMUST00000027792	2386	-1	ENSMUST00000029419	131451	-1	ENSMUST00000030795	2279	-1	ENSMUST00000032335	51813	-1	ENSMUST00000034093	3088	-1
ENSMUST00000075052	84079	1	ENSMUST00000019982	7423	-1	ENSMUST00000021466	36990	-1	ENSMUST00000022782	6827	-1	ENSMUST00000024783	2956	-1	ENSMUST00000026154	2380	-1	ENSMUST00000027792	2428	-1	ENSMUST00000029419	131727	-1	ENSMUST00000030795	2788	-1	ENSMUST00000032335	51824	-1	ENSMUST00000034093	31691	-1
ENSMUST00000075052	94367	1	ENSMUST00000019982	7599	-1	ENSMUST00000021466	37216	-1	ENSMUST00000022782	6909	-1	ENSMUST00000024783	3587	-1	ENSMUST00000026154	2504	-1	ENSMUST00000027792	2502	-1	ENSMUST00000029419	133936	-1	ENSMUST00000030795	2932	-1	ENSMUST00000032335	52183	-1	ENSMUST00000034093	32799	-1
ENSMUST00000131615	1116	1	ENSMUST00000019982	7964	-1	ENSMUST00000021466	37767	-1	ENSMUST00000022782	6952	-1	ENSMUST00000024783	3657	-1	ENSMUST00000026154	2531	-1	ENSMUST00000027792	2644	-1	ENSMUST00000029419	133958	-1	ENSMUST00000030795	2988	-1	ENSMUST00000032335	52575	-1	ENSMUST00000034093	335	-1
ENSMUST00000131615	7478	1	ENSMUST00000019982	8256	-1	ENSMUST00000021466	39861	-1	ENSMUST00000022782	6976	-1	ENSMUST00000024783	3700	-1	ENSMUST00000026154	2645	-1	ENSMUST00000027792	2670	-1	ENSMUST00000029419	14060	-1	ENSMUST00000030795	3407	-1	ENSMUST00000032335	53413	-1	ENSMUST00000034093	35182	-1
ENSMUST00000131615	8430	1	ENSMUST00000019987	10662	-1	ENSMUST00000021466	39920	-1	ENSMUST00000022782	7027	-1	ENSMUST00000024783	3748	-1	ENSMUST00000026154	2749	-1	ENSMUST00000027792	2740	-1	ENSMUST00000029419	146255	-1	ENSMUST00000030795	3482	-1	ENSMUST00000032335	55367	-1	ENSMUST00000034093	36259	-1
ENSMUST00000072921	10895	1	ENSMUST00000019987	1113	-1	ENSMUST00000021466	40905	-1	ENSMUST00000022782	7031	-1	ENSMUST00000024783	3811	-1	ENSMUST00000026154	3103	-1	ENSMUST00000027792	2749	-1	ENSMUST00000029419	150798	-1	ENSMUST00000030795	350	-1	ENSMUST00000032335	55618	-1	ENSMUST00000034093	36779	-1
ENSMUST00000072921	10496	1	ENSMUST00000019987	12963	-1	ENSMUST00000021466	42198	-1	ENSMUST00000022782	705	-1	ENSMUST00000024783	3852	-1	ENSMUST00000026154	3208	-1	ENSMUST00000027792	2991	-1	ENSMUST00000029419	154197	-1	ENSMUST00000030795	3569	-1	ENSMUST00000032335	55785	-1	ENSMUST00000034093	37334	-1
ENSMUST00000072921	10863	1	ENSMUST00000019987	13349	-1	ENSMUST00000021466	45223	-1	ENSMUST00000022782	7091	-1	ENSMUST00000024783	3958	-1	ENSMUST00000026154	3309	-1	ENSMUST00000027792	3106	-1	ENSMUST00000029419	174943	-1	ENSMUST00000030795	3753	-1	ENSMUST00000032335	57428	-1	ENSMUST00000034093	3924	-1
ENSMUST00000066432	3282	1	ENSMUST00000019987	13385	-1	ENSMUST00000021466	46321	-1	ENSMUST00000022782	7299	-1	ENSMUST00000024783	4228	-1	ENSMUST00000026154	3435	-1	ENSMUST00000027792	3123	-1	ENSMUST00000029419	175679	-1	ENSMUST00000030795	3939	-1	ENSMUST00000032335	58547	-1	ENSMUST00000034093	42227	-1
ENSMUST00000066432	3295	1	ENSMUST00000019987	13568	-1	ENSMUST00000021466	4714	-1	ENSMUST00000022782	7310	-1	ENSMUST00000024783	4306	-1	ENSMUST00000026154	3503	-1	ENSMUST00000027792	3209	-1	ENSMUST00000029419	179633	-1	ENSMUST00000030795	4180	-1	ENSMUST00000032335	58997	-1	ENSMUST00000034093	4251	-1
ENSMUST00000066432	3415	1	ENSMUST00000019987	13807	-1	ENSMUST00000021466	47972	-1	ENSMUST00000022782	762	-1	ENSMUST00000024783	4453	-1	ENSMUST00000026154	3586	-1	ENSMUST00000027792	3471	-1	ENSMUST00000029419	182631	-1	ENSMUST00000030795	487	-1	ENSMUST00000032335	64306	-1	ENSMUST00000034093	42849	-1
ENSMUST00000066432	3516	1	ENSMUST00000019987	13962	-1	ENSMUST00000021466	48428	-1	ENSMUST00000022782	90	-1	ENSMUST00000024783	4636	-1	ENSMUST00000026154	3694	-1	ENSMUST00000027792	3539	-1	ENSMUST00000029419	182669	-1	ENSMUST00000030795	4994	-1	ENSMUST00000032335	65933	-1	ENSMUST00000034093	43135	-1
ENSMUST00000066432	3556	1	ENSMUST00000019987	13974	-1	ENSMUST00000021466	49643	-1	ENSMUST00000022783	109	-1	ENSMUST00000024783	471	-1	ENSMUST00000026154	3973	-1	ENSMUST00000027792	3545	-1	ENSMUST00000029419	186774	-1	ENSMUST00000030795	5890	-1	ENSMUST00000032335	66104	-1	ENSMUST00000034093	45229	-1
ENSMUST00000066432	3588	1	ENSMUST00000019987	14867	-1	ENSMUST00000021466	51309	-1	ENSMUST00000022783	1130	-1	ENSMUST00000024783	5252	-1	ENSMUST00000026154	3998	-1	ENSMUST00000027792	355	-1	ENSMUST00000029419	189388	-1	ENSMUST00000030795	5944	-1	ENSMUST00000032335	72661	-1	ENSMUST00000034093	4533	-1
ENSMUST00000066432	3663	1	ENSMUST00000019987	15261	-1	ENSMUST00000021466	51590	-1	ENSMUST00000022783	1242	-1	ENSMUST00000024783	5293	-1	ENSMUST00000026154	4023	-1	ENSMUST00000027792	3551	-1	ENSMUST00000029419	189638	-1	ENSMUST00000030795	6125	-1	ENSMUST00000032335	72730	-1	ENSMUST00000034093	4687	-1
ENSMUST00000066432	4269	1	ENSMUST00000019987	15942	-1	ENSMUST00000021466	52205	-1	ENSMUST00000022783	1409	-1	ENSMUST00000024783	533	-1	ENSMUST00000026154	403	-1	ENSMUST00000027792	3602	-1	ENSMUST00000029419	19022	-1	ENSMUST00000030795	620	-1	ENSMUST00000032335	73592	-1	ENSMUST00000034093	48062	-1
ENSMUST00000066432	4289	1	ENSMUST00000019987	15993	-1	ENSMUST00000021466	55155	-1	ENSMUST00000022783	1426	-1	ENSMUST00000024783	5668	-1	ENSMUST00000026154	4633	-1	ENSMUST00000027792	3619	-1	ENSMUST00000029419	191987	-1	ENSMUST00000030795	6421	-1	ENSMUST00000032335	74006	-1	ENSMUST00000034093	4909	-1
ENSMUST00000028377	81015	1	ENSMUST00000019987	17430	-1	ENSMUST00000021466	55356	-1	ENSMUST00000022783	1567	-1	ENSMUST00000024783	6046	-1	ENSMUST00000026154	480	-1	ENSMUST00000027792	363	-1	ENSMUST00000029419	192860	-1	ENSMUST00000030795	6475	-1	ENSMUST00000032335	74132	-1	ENSMUST00000034093	49122	-1
ENSMUST00000028377	96922	1	ENSMUST00000019987	17551	-1	ENSMUST00000021466	55666	-1	ENSMUST00000022783	1711	-1	ENSMUST00000024783	6254	-1	ENSMUST00000026154	5311	-1	ENSMUST00000027792	3831	-1	ENSMUST00000029419	194152	-1	ENSMUST00000030795	6617	-1	ENSMUST00000032335	76330	-1	ENSMUST00000034093	50599	-1
ENSMUST00000028377	143921	1	ENSMUST00000019987	18930	-1	ENSMUST00000021466	5687	-1	ENSMUST00000022783	189	-1	ENSMUST00000024783	6425	-1	ENSMUST00000026154	558	-1	ENSMUST00000027792	3847	-1	ENSMUST00000029419	196440	-1	ENSMUST00000030795	7064	-1	ENSMUST00000032335	76659	-1	ENSMUST00000034093	50953	-1
ENSMUST00000028377	143939	1	ENSMUST00000019987	19714	-1	ENSMUST00000021466	59091	-1	ENSMUST00000022783	1973	-1	ENSMUST00000024783	6540	-1	ENSMUST00000026154	6055	-1	ENSMUST00000027792	4118	-1	ENSMUST00000029419	200582	-1	ENSMUST00000030795	7461	-1	ENSMUST00000032335	78685	-1	ENSMUST00000034093	51432	-1
ENSMUST00000028377	144070	1	ENSMUST00000019987	19840	-1	ENSMUST00000021466	59666	-1	ENSMUST00000022783	201	-1	ENSMUST00000024783	6783	-1	ENSMUST00000026154	6081	-1	ENSMUST00000027792	4160	-1	ENSMUST00000029419	20163	-1	ENSMUST00000030795	7890	-1	ENSMUST00000032335	80796	-1	ENSMUST00000034093	51976	-1
ENSMUST00000028377	144094	1	ENSMUST00000019987	20027	-1	ENSMUST00000021466	60817	-1	ENSMUST00000022783	2024	-1	ENSMUST00000024783	6987	-1	ENSMUST00000026154	6138	-1	ENSMUST00000027792	4175	-1	ENSMUST00000029419	203061	-1	ENSMUST00000030795	790	-1	ENSMUST00000032335	81100	-1	ENSMUST00000034093	52163	-1
ENSMUST00000028377	144137	1	ENSMUST00000019987	20522	-1	ENSMUST00000021466	61600	-1	ENSMUST00000022783	2035	-1	ENSMUST00000024783	7058	-1	ENSMUST00000026154	6285	-1	ENSMUST00000027792	4201	-1	ENSMUST00000029419	207890	-1	ENSMUST00000030795	8178	-1	ENSMUST00000032335	81789	-1	ENSMUST00000034093	52723	-1
ENSMUST00000028377	144195	1	ENSMUST00000019987	20535	-1	ENSMUST00000021466	6259	-1	ENSMUST00000022783	2104	-1	ENSMUST00000024783	7146	-1	ENSMUST00000026154	6295	-1	ENSMUST00000027792	4212	-1	ENSMUST00000029419	212386	-1	ENSMUST00000030795	8280	-1	ENSMUST00000032335	83912	-1	ENSMUST00000034093	52984	-1
ENSMUST00000028377	144272	1	ENSMUST00000019987	20861	-1	ENSMUST00000021466	62631	-1	ENSMUST00000022783	215	-1	ENSMUST00000024783	7158	-1	ENSMUST00000026154	6408	-1	ENSMUST00000027792	4235	-1	ENSMUST00000029419	214831	-1	ENSMUST00000030795	8609	-1	ENSMUST00000032335	84348	-1	ENSMUST00000034093	5309	-1
ENSMUST00000112395	176295	1	ENSMUST00000019987	20877	-1	ENSMUST00000021466	63311	-1	ENSMUST00000022783	2206	-1	ENSMUST00000024783	7275	-1	ENSMUST00000026154	675	-1	ENSMUST00000027792	4346	-1	ENSMUST00000029419	217486	-1	ENSMUST00000030795	8639	-1	ENSMUST00000032335	84479	-1	ENSMUST00000034093	5364	-1
ENSMUST00000112395	176321	1	ENSMUST00000019987	22371	-1	ENSMUST00000021466	63373	-1	ENSMUST00000022783	2272	-1	ENSMUST00000024783	7329	-1	ENSMUST00000026154	6753	-1	ENSMUST00000027792	4415	-1	ENSMUST00000029419	218694	-1	ENSMUST00000030795	8905	-1	ENSMUST00000032335	85531	-1	ENSMUST00000034093	53698	-1
ENSMUST00000112395	176327	1	ENSMUST00000019987	22511	-1	ENSMUST00000021466	63466	-1	ENSMUST00000022783	2294	-1	ENSMUST00000024783	7900	-1	ENSMUST00000026154	6778	-1	ENSMUST00000027792	4898	-1	ENSMUST00000029419	230309	-1	ENSMUST00000030795	8966	-1	ENSMUST00000032335	86791	-1	ENSMUST00000034093	54148	-1
ENSMUST00000112395	176498	1	ENSMUST00000019987	2346	-1	ENSMUST00000021466	64270	-1	ENSMUST00000022783	2589	-1	ENSMUST00000024783	794	-1	ENSMUST00000026154	7344	-1	ENSMUST00000027792	5051	-1	ENSMUST00000029419	233130	-1	ENSMUST00000030795	9125	-1	ENSMUST00000032335	86813	-1	ENSMUST00000034093	56068	-1
ENSMUST00000112395	176503	1	ENSMUST00000019987	23468	-1	ENSMUST00000021466	65480	-1	ENSMUST00000022783	263	-1	ENSMUST00000024783	7964	-1	ENSMUST00000026154	7606	-1	ENSMUST00000027792	5230	-1	ENSMUST00000029419	242093	-1	ENSMUST00000030795	9696	-1	ENSMUST00000032335	87129	-1	ENSMUST00000034093	56152	-1
ENSMUST00000112395	176799	1	ENSMUST00000019987	23525	-1	ENSMUST00000021466	66098	-1	ENSMUST00000022783	2685	-1	ENSMUST00000024783	823	-1	ENSMUST00000026154	7648	-1	ENSMUST00000027792	5234	-1	ENSMUST00000029419	32060	-1	ENSMUST00000030795	9906	-1	ENSMUST00000032372	10309	-1	ENSMUST00000034093	57078	-1
ENSMUST00000112395	176835	1	ENSMUST00000019987	23792	-1	ENSMUST00000021466	66496	-1	ENSMUST00000022783	2734	-1	ENSMUST00000024783	8576	-1	ENSMUST00000026154	7682	-1	ENSMUST00000027792	5374	-1	ENSMUST00000029419	33353	-1	ENSMUST00000030795	9945	-1	ENSMUST00000032372	11125	-1	ENSMUST00000034093	57313	-1
ENSMUST00000112395	177025	1	ENSMUST00000019987	23887	-1	ENSMUST00000021466	67069	-1	ENSMUST00000022783	2927	-1	ENSMUST00000024783	8604	-1	ENSMUST00000026154	7753	-1	ENSMUST00000027792	5408	-1	ENSMUST00000029419	35895	-1	ENSMUST00000030811	10317	-1	ENSMUST00000032372	11229	-1	ENSMUST00000034093	57387	-1
ENSMUST00000112395	177465	1	ENSMUST00000019987	25656	-1	ENSMUST00000021466	67325	-1	ENSMUST00000022783	2960	-1	ENSMUST00000024783	8679	-1	ENSMUST00000026154	8184	-1	ENSMUST00000027792	6162	-1	ENSMUST00000029419	54850	-1	ENSMUST00000030811	10496	-1	ENSMUST00000032372	1143	-1	ENSMUST00000034093	58007	-1
ENSMUST00000112395	177530	1	ENSMUST00000019987	25821	-1	ENSMUST00000021466	68312	-1	ENSMUST00000022783	3118	-1	ENSMUST00000024783	8988	-1	ENSMUST00000026154	8244	-1	ENSMUST00000027792	6191	-1	ENSMUST00000029419	59616	-1	ENSMUST00000030811	10522	-1	ENSMUST00000032372	11433	-1	ENSMUST00000034093	58783	-1
ENSMUST00000112395	179024	1	ENSMUST00000019987	25997	-1	ENSMUST00000021466	68413	-1	ENSMUST00000022783	3209	-1	ENSMUST00000024783	9162	-1	ENSMUST00000026154	8499	-1	ENSMUST00000027792	6199	-1	ENSMUST00000029419	60441	-1	ENSMUST00000030811	10796	-1	ENSMUST00000032372	11585	-1	ENSMUST00000034093	59227	-1
ENSMUST00000028378	24582	1	ENSMUST00000019987	26760	-1	ENSMUST00000021466	70333	-1	ENSMUST00000022783	3499	-1	ENSMUST00000024783	9516	-1	ENSMUST00000026154	8569	-1	ENSMUST00000027792	6336	-1	ENSMUST00000029419	61408	-1	ENSMUST00000030811	11564	-1	ENSMUST00000032372	11637	-1	ENSMUST00000034093	6456	-1
ENSMUST00000112366	1862	1	ENSMUST00000019987	26854	-1	ENSMUST00000021466	7474	-1	ENSMUST00000022783	3818	-1	ENSMUST00000024783	9547	-1	ENSMUST00000026154	8710	-1	ENSMUST00000027792	6698	-1	ENSMUST00000029419	64413	-1	ENSMUST00000030811	1168	-1	ENSMUST00000032372	11893	-1	ENSMUST00000034093	9020	-1
ENSMUST00000112366	1869	1	ENSMUST00000019987	26981	-1	ENSMUST00000021467	10706	-1	ENSMUST00000022783	3845	-1	ENSMUST00000024783	9801	-1	ENSMUST00000026154	8785	-1	ENSMUST00000027792	6761	-1	ENSMUST00000029419	65536	-1	ENSMUST00000030811	11745	-1	ENSMUST00000032372	12769	-1	ENSMUST00000034093	9877	-1
ENSMUST00000112366	1960	1	ENSMUST00000019987	2845	-1	ENSMUST00000021467	10807	-1	ENSMUST00000022783	3866	-1	ENSMUST00000024802	10286	-1	ENSMUST00000026154	9080	-1	ENSMUST00000027792	6998	-1	ENSMUST00000029419	66552	-1	ENSMUST00000030811	11751	-1	ENSMUST00000032372	13013	-1	ENSMUST00000034094	10180	-1
ENSMUST00000112366	2209	1	ENSMUST00000019987	29964	-1	ENSMUST00000021467	10857	-1	ENSMUST00000022783	3901	-1	ENSMUST00000024802	10611	-1	ENSMUST00000026154	9460	-1	ENSMUST00000027792	7244	-1	ENSMUST00000029419	7143	-1	ENSMUST00000030811	11800	-1	ENSMUST00000032372	13192	-1	ENSMUST00000034094	10246	-1
ENSMUST00000112366	2235	1	ENSMUST00000019987	30274	-1	ENSMUST00000021467	10891	-1	ENSMUST00000022783	391	-1	ENSMUST00000024802	10705	-1	ENSMUST00000026154	9497	-1	ENSMUST00000027792	752	-1	ENSMUST00000029419	71954	-1	ENSMUST00000030811	12105	-1	ENSMUST00000032372	13303	-1	ENSMUST00000034094	10283	-1
ENSMUST00000112366	2301	1	ENSMUST00000019987	30515	-1	ENSMUST00000021467	11237	-1	ENSMUST00000022783	3941	-1	ENSMUST00000024802	11940	-1	ENSMUST00000026154	9808	-1	ENSMUST00000027792	7568	-1	ENSMUST00000029419	72456	-1	ENSMUST00000030811	1223	-1	ENSMUST00000032372	14033	-1	ENSMUST00000034094	10334	-1
ENSMUST00000112366	2924	1	ENSMUST00000019987	31234	-1	ENSMUST00000021467	12168	-1	ENSMUST00000022783	3984	-1	ENSMUST00000024802	12017	-1	ENSMUST00000026154	9838	-1	ENSMUST00000027792	799	-1	ENSMUST00000029419	74319	-1	ENSMUST00000030811	12770	-1	ENSMUST00000032372	14233	-1	ENSMUST00000034094	10437	-1
ENSMUST00000112366	2951	1	ENSMUST00000019987	3154	-1	ENSMUST00000021467	12782	-1	ENSMUST00000022783	4002	-1	ENSMUST00000024802	12117	-1	ENSMUST00000026154	9933	-1	ENSMUST00000027792	895	-1	ENSMUST00000029419	77306	-1	ENSMUST00000030811	13041	-1	ENSMUST00000032372	14299	-1	ENSMUST00000034094	10463	-1
ENSMUST00000112366	47232	1	ENSMUST00000019987	32596	-1	ENSMUST00000021467	12909	-1	ENSMUST00000022783	4147	-1	ENSMUST00000024802	12290	-1	ENSMUST00000026170	10514	-1	ENSMUST00000027792	948	-1	ENSMUST00000029419	79289	-1	ENSMUST00000030811	13055	-1	ENSMUST00000032372	14330	-1	ENSMUST00000034094	10865	-1
ENSMUST00000100064	3279	1	ENSMUST00000019987	32962	-1	ENSMUST00000021467	12925	-1	ENSMUST00000022783	4153	-1	ENSMUST00000024802	12367	-1	ENSMUST00000026170	11963	-1	ENSMUST00000027792	986	-1	ENSMUST00000029419	84263	-1	ENSMUST00000030811	13302	-1	ENSMUST00000032372	14370	-1	ENSMUST00000034094	11206	-1
ENSMUST00000100064	3481	1	ENSMUST00000019987	33089	-1	ENSMUST00000021467	13111	-1	ENSMUST00000022783	4212	-1	ENSMUST00000024802	13167	-1	ENSMUST00000026170	1271	-1	ENSMUST00000027792	995	-1	ENSMUST00000029419	91211	-1	ENSMUST00000030811	13493	-1	ENSMUST00000032372	14743	-1	ENSMUST00000034094	11336	-1
ENSMUST00000100064	4194	1	ENSMUST00000019987	3386	-1	ENSMUST00000021467	13972	-1	ENSMUST00000022783	484	-1	ENSMUST00000024802	13296	-1	ENSMUST00000026170	13563	-1	ENSMUST00000027795	10067	-1	ENSMUST00000029419	93224	-1	ENSMUST00000030811	13680	-1	ENSMUST00000032372	14891	-1	ENSMUST00000034094	11423	-1
ENSMUST00000112346	97	1	ENSMUST00000019987	36302	-1	ENSMUST00000021467	14265	-1	ENSMUST00000022783	507	-1	ENSMUST00000024802	13309	-1	ENSMUST00000026170	13800	-1	ENSMUST00000027795	106659	-1	ENSMUST00000029419	93569	-1	ENSMUST00000030811	1622	-1	ENSMUST00000032372	15501	-1	ENSMUST00000034094	1221	-1
ENSMUST00000112346	311	1	ENSMUST00000019987	36965	-1	ENSMUST00000021467	14300	-1	ENSMUST00000022783	783	-1	ENSMUST00000024802	1479	-1	ENSMUST00000026170	1488	-1	ENSMUST00000027795	107139	-1	ENSMUST00000029419	95584	-1	ENSMUST00000030811	1964	-1	ENSMUST00000032372	15626	-1	ENSMUST00000034094	1284	-1
ENSMUST00000112346	370	1	ENSMUST00000019987	37053	-1	ENSMUST00000021467	14325	-1	ENSMUST00000022783	810	-1	ENSMUST00000024802	1556	-1	ENSMUST00000026170	1495	-1	ENSMUST00000027795	107401	-1	ENSMUST00000029419	96139	-1	ENSMUST00000030811	2158	-1	ENSMUST00000032372	15980	-1	ENSMUST00000034094	1520	-1
ENSMUST00000112346	442	1	ENSMUST00000019987	39128	-1	ENSMUST00000021467	14468	-1	ENSMUST00000022783	848	-1	ENSMUST00000024802	1742	-1	ENSMUST00000026170	15761	-1	ENSMUST00000027795	107423	-1	ENSMUST00000029419	98330	-1	ENSMUST00000030811	2189	-1	ENSMUST00000032372	16095	-1	ENSMUST00000034094	1536	-1
ENSMUST00000112346	528	1	ENSMUST00000019987	39596	-1	ENSMUST00000021467	14630	-1	ENSMUST00000022783	892	-1	ENSMUST00000024802	1779	-1	ENSMUST00000026170	17826	-1	ENSMUST00000027795	11443	-1	ENSMUST00000029444	10341	-1	ENSMUST00000030811	2248	-1	ENSMUST00000032372	16157	-1	ENSMUST00000034094	22	-1
ENSMUST00000112346	610	1	ENSMUST00000019987	40019	-1	ENSMUST00000021467	14842	-1	ENSMUST00000022783	928	-1	ENSMUST00000024802	183	-1	ENSMUST00000026170	18593	-1	ENSMUST00000027795	12976	-1	ENSMUST00000029444	10878	-1	ENSMUST00000030811	2272	-1	ENSMUST00000032372	16307	-1	ENSMUST00000034094	2266	-1
ENSMUST00000112346	661	1	ENSMUST00000019987	40752	-1	ENSMUST00000021467	14979	-1	ENSMUST00000022783	985	-1	ENSMUST00000024802	2084	-1	ENSMUST00000026170	1900	-1	ENSMUST00000027795	13638	-1	ENSMUST00000029444	11972	-1	ENSMUST00000030811	3165	-1	ENSMUST00000032372	16580	-1	ENSMUST00000034094	2883	-1
ENSMUST00000112346	670	1	ENSMUST00000019987	41004	-1	ENSMUST00000021467	15139	-1	ENSMUST00000022784	10024	-1	ENSMUST00000024802	2173	-1	ENSMUST00000026170	19068	-1	ENSMUST00000027795	1375	-1	ENSMUST00000029444	12692	-1	ENSMUST00000030811	3240	-1	ENSMUST00000032372	2405	-1	ENSMUST00000034094	2889	-1
ENSMUST00000112346	778	1	ENSMUST00000019987	41678	-1	ENSMUST00000021467	15410	-1	ENSMUST00000022784	1044	-1	ENSMUST00000024802	2825	-1	ENSMUST00000026170	20088	-1	ENSMUST00000027795	16646	-1	ENSMUST00000029444	13867	-1	ENSMUST00000030811	3474	-1	ENSMUST00000032372	2584	-1	ENSMUST00000034094	2994	-1
ENSMUST00000112346	784	1	ENSMUST00000019987	41784	-1	ENSMUST00000021467	15707	-1	ENSMUST00000022784	10829	-1	ENSMUST00000024802	2991	-1	ENSMUST00000026170	20684	-1	ENSMUST00000027795	17352	-1	ENSMUST00000029444	16945	-1	ENSMUST00000030811	3579	-1	ENSMUST00000032372	2915	-1	ENSMUST00000034094	3016	-1
ENSMUST00000112346	945	1	ENSMUST00000019987	422	-1	ENSMUST00000021467	15840	-1	ENSMUST00000022784	10976	-1	ENSMUST00000024802	3028	-1	ENSMUST00000026170	21089	-1	ENSMUST00000027795	17826	-1	ENSMUST00000029444	19028	-1	ENSMUST00000030811	4219	-1	ENSMUST00000032372	3160	-1	ENSMUST00000034094	3580	-1
ENSMUST00000112346	977	1	ENSMUST00000019987	4324	-1	ENSMUST00000021467	1603	-1	ENSMUST00000022784	11000	-1	ENSMUST00000024802	3195	-1	ENSMUST00000026170	21244	-1	ENSMUST00000027795	18117	-1	ENSMUST00000029444	20355	-1	ENSMUST00000030811	4511	-1	ENSMUST00000032372	3208	-1	ENSMUST00000034094	3809	-1
ENSMUST00000112346	1255	1	ENSMUST00000019987	4598	-1	ENSMUST00000021467	16436	-1	ENSMUST00000022784	11024	-1	ENSMUST00000024802	3252	-1	ENSMUST00000026170	21319	-1	ENSMUST00000027795	18805	-1	ENSMUST00000029444	20733	-1	ENSMUST00000030811	4596	-1	ENSMUST00000032372	3941	-1	ENSMUST00000034094	4048	-1
ENSMUST00000112346	140	1	ENSMUST00000019987	4772	-1	ENSMUST00000021467	16564	-1	ENSMUST00000022784	11031	-1	ENSMUST00000024802	3407	-1	ENSMUST00000026170	21680	-1	ENSMUST00000027795	26520	-1	ENSMUST00000029444	2521	-1	ENSMUST00000030811	462	-1	ENSMUST00000032372	4151	-1	ENSMUST00000034094	4198	-1
ENSMUST00000112346	168	1	ENSMUST00000019987	5047	-1	ENSMUST00000021467	16723	-1	ENSMUST00000022784	1110	-1	ENSMUST00000024802	355	-1	ENSMUST00000026170	2290	-1	ENSMUST00000027795	27240	-1	ENSMUST00000029444	2670	-1	ENSMUST00000030811	4839	-1	ENSMUST00000032372	4298	-1	ENSMUST00000034094	4707	-1
ENSMUST00000112346	393	1	ENSMUST00000019987	5897	-1	ENSMUST00000021467	17036	-1	ENSMUST00000022784	11415	-1	ENSMUST00000024802	3765	-1	ENSMUST00000026170	25289	-1	ENSMUST00000027795	27666	-1	ENSMUST00000029444	28921	-1	ENSMUST00000030811	5149	-1	ENSMUST00000032372	452	-1	ENSMUST00000034094	4865	-1
ENSMUST00000112346	1213	1	ENSMUST00000019987	8455	-1	ENSMUST00000021467	17349	-1	ENSMUST00000022784	11467	-1	ENSMUST00000024802	3790	-1	ENSMUST00000026170	25600	-1	ENSMUST00000027795	29151	-1	ENSMUST00000029444	30783	-1	ENSMUST00000030811	5191	-1	ENSMUST00000032372	4568	-1	ENSMUST00000034094	5077	-1
ENSMUST00000112346	4428	1	ENSMUST00000019987	8577	-1	ENSMUST00000021467	17392	-1	ENSMUST00000022784	11576	-1	ENSMUST00000024802	3825	-1	ENSMUST00000026170	25965	-1	ENSMUST00000027795	3109	-1	ENSMUST00000029444	30982	-1	ENSMUST00000030811	5245	-1	ENSMUST00000032372	4607	-1	ENSMUST00000034094	509	-1
ENSMUST00000112346	4925	1	ENSMUST00000019987	9247	-1	ENSMUST00000021467	1873	-1	ENSMUST00000022784	11828	-1	ENSMUST00000024802	415	-1	ENSMUST00000026170	26304	-1	ENSMUST00000027795	31504	-1	ENSMUST00000029444	31203	-1	ENSMUST00000030811	5562	-1	ENSMUST00000032372	4661	-1	ENSMUST00000034094	5607	-1
ENSMUST00000028426	247164	1	ENSMUST00000019999	10083	-1	ENSMUST00000021467	18875	-1	ENSMUST00000022784	12082	-1	ENSMUST00000024802	4221	-1	ENSMUST00000026170	26844	-1	ENSMUST00000027795	33166	-1	ENSMUST00000029444	31285	-1	ENSMUST00000030811	5705	-1	ENSMUST00000032372	4825	-1	ENSMUST00000034094	5672	-1
ENSMUST00000028426	247187	1	ENSMUST00000019999	105303	-1	ENSMUST00000021467	19197	-1	ENSMUST00000022784	12143	-1	ENSMUST00000024802	4421	-1	ENSMUST00000026170	27242	-1	ENSMUST00000027795	33803	-1	ENSMUST00000029444	32853	-1	ENSMUST00000030811	6198	-1	ENSMUST00000032372	5323	-1	ENSMUST00000034094	6057	-1
ENSMUST00000102709	867	1	ENSMUST00000019999	105846	-1	ENSMUST00000021467	19526	-1	ENSMUST00000022784	12305	-1	ENSMUST00000024802	4562	-1	ENSMUST00000026170	27301	-1	ENSMUST00000027795	33890	-1	ENSMUST00000029444	32944	-1	ENSMUST00000030811	6405	-1	ENSMUST00000032372	5433	-1	ENSMUST00000034094	6323	-1
ENSMUST00000040915	26371	1	ENSMUST00000019999	106576	-1	ENSMUST00000021467	19571	-1	ENSMUST00000022784	12398	-1	ENSMUST00000024802	4772	-1	ENSMUST00000026170	27438	-1	ENSMUST00000027795	35606	-1	ENSMUST00000029444	3423	-1	ENSMUST00000030811	6605	-1	ENSMUST00000032372	5644	-1	ENSMUST00000034094	6505	-1
ENSMUST00000028494	5999	1	ENSMUST00000019999	107544	-1	ENSMUST00000021467	20703	-1	ENSMUST00000022784	1349	-1	ENSMUST00000024802	4790	-1	ENSMUST00000026170	28247	-1	ENSMUST00000027795	38039	-1	ENSMUST00000029444	34287	-1	ENSMUST00000030811	6728	-1	ENSMUST00000032372	5658	-1	ENSMUST00000034094	6556	-1
ENSMUST00000028494	6106	1	ENSMUST00000019999	109842	-1	ENSMUST00000021467	20863	-1	ENSMUST00000022784	1788	-1	ENSMUST00000024802	4996	-1	ENSMUST00000026170	30285	-1	ENSMUST00000027795	39902	-1	ENSMUST00000029444	34466	-1	ENSMUST00000030811	6955	-1	ENSMUST00000032372	6055	-1	ENSMUST00000034094	6595	-1
ENSMUST00000028494	7199	1	ENSMUST00000019999	113001	-1	ENSMUST00000021467	20946	-1	ENSMUST00000022784	2308	-1	ENSMUST00000024802	5195	-1	ENSMUST00000026170	30533	-1	ENSMUST00000027795	49353	-1	ENSMUST00000029444	34647	-1	ENSMUST00000030811	7002	-1	ENSMUST00000032372	6216	-1	ENSMUST00000034094	6729	-1
ENSMUST00000028494	7209	1	ENSMUST00000019999	113169	-1	ENSMUST00000021467	21150	-1	ENSMUST00000022784	2454	-1	ENSMUST00000024802	5338	-1	ENSMUST00000026170	30729	-1	ENSMUST00000027795	49440	-1	ENSMUST00000029444	34992	-1	ENSMUST00000030811	7256	-1	ENSMUST00000032372	6990	-1	ENSMUST00000034094	6854	-1
ENSMUST00000028494	7455	1	ENSMUST00000019999	114556	-1	ENSMUST00000021467	21317	-1	ENSMUST00000022784	2671	-1	ENSMUST00000024802	5390	-1	ENSMUST00000026170	30902	-1	ENSMUST00000027795	50387	-1	ENSMUST00000029444	35811	-1	ENSMUST00000030811	7324	-1	ENSMUST00000032372	7365	-1	ENSMUST00000034094	6943	-1
ENSMUST00000053087	1500	1	ENSMUST00000019999	114580	-1	ENSMUST00000021467	21565	-1	ENSMUST00000022784	3056	-1	ENSMUST00000024802	5638	-1	ENSMUST00000026170	30948	-1	ENSMUST00000027795	51947	-1	ENSMUST00000029444	36121	-1	ENSMUST00000030811	7419	-1	ENSMUST00000032372	7661	-1	ENSMUST00000034094	6948	-1
ENSMUST00000053087	1822	1	ENSMUST00000019999	115527	-1	ENSMUST00000021467	2295	-1	ENSMUST00000022784	3063	-1	ENSMUST00000024802	5646	-1	ENSMUST00000026170	32340	-1	ENSMUST00000027795	52118	-1	ENSMUST00000029444	3795	-1	ENSMUST00000030811	7558	-1	ENSMUST00000032372	8044	-1	ENSMUST00000034094	7281	-1
ENSMUST00000053087	2040	1	ENSMUST00000019999	116438	-1	ENSMUST00000021467	2314	-1	ENSMUST00000022784	37	-1	ENSMUST00000024802	597	-1	ENSMUST00000026170	33801	-1	ENSMUST00000027795	55197	-1	ENSMUST00000029444	38212	-1	ENSMUST00000030811	7821	-1	ENSMUST00000032372	8130	-1	ENSMUST00000034094	736	-1
ENSMUST00000053087	2080	1	ENSMUST00000019999	116913	-1	ENSMUST00000021467	2398	-1	ENSMUST00000022784	3937	-1	ENSMUST00000024802	6045	-1	ENSMUST00000026170	33837	-1	ENSMUST00000027795	56556	-1	ENSMUST00000029444	42047	-1	ENSMUST00000030811	7938	-1	ENSMUST00000032372	8788	-1	ENSMUST00000034094	7497	-1
ENSMUST00000112251	76104	1	ENSMUST00000019999	118539	-1	ENSMUST00000021467	2485	-1	ENSMUST00000022784	4025	-1	ENSMUST00000024802	6114	-1	ENSMUST00000026170	34490	-1	ENSMUST00000027795	56763	-1	ENSMUST00000029444	42869	-1	ENSMUST00000030811	8381	-1	ENSMUST00000032372	8903	-1	ENSMUST00000034094	7543	-1
ENSMUST00000112251	76116	1	ENSMUST00000019999	118656	-1	ENSMUST00000021467	2500	-1	ENSMUST00000022784	4494	-1	ENSMUST00000024802	6187	-1	ENSMUST00000026170	36179	-1	ENSMUST00000027795	58014	-1	ENSMUST00000029444	44561	-1	ENSMUST00000030811	8412	-1	ENSMUST00000032372	905	-1	ENSMUST00000034094	786	-1
ENSMUST00000112251	76133	1	ENSMUST00000019999	119752	-1	ENSMUST00000021467	2621	-1	ENSMUST00000022784	4538	-1	ENSMUST00000024802	6502	-1	ENSMUST00000026170	37398	-1	ENSMUST00000027795	58561	-1	ENSMUST00000029444	44776	-1	ENSMUST00000030811	8426	-1	ENSMUST00000032372	9226	-1	ENSMUST00000034094	7891	-1
ENSMUST00000100043	2341	1	ENSMUST00000019999	124632	-1	ENSMUST00000021467	3484	-1	ENSMUST00000022784	4644	-1	ENSMUST00000024802	6524	-1	ENSMUST00000026170	37499	-1	ENSMUST00000027795	59427	-1	ENSMUST00000029444	45806	-1	ENSMUST00000030811	8459	-1	ENSMUST00000032372	9869	-1	ENSMUST00000034094	7912	-1
ENSMUST00000038584	1099	1	ENSMUST00000019999	128237	-1	ENSMUST00000021467	359	-1	ENSMUST00000022784	4676	-1	ENSMUST00000024802	680	-1	ENSMUST00000026170	38420	-1	ENSMUST00000027795	5987	-1	ENSMUST00000029444	4624	-1	ENSMUST00000030811	8473	-1	ENSMUST00000032374	1039	-1	ENSMUST00000034094	798	-1
ENSMUST00000038584	1415	1	ENSMUST00000019999	129385	-1	ENSMUST00000021467	3611	-1	ENSMUST00000022784	4738	-1	ENSMUST00000024802	7022	-1	ENSMUST00000026170	39539	-1	ENSMUST00000027795	65840	-1	ENSMUST00000029444	46449	-1	ENSMUST00000030811	8483	-1	ENSMUST00000032374	1174	-1	ENSMUST00000034094	8043	-1
ENSMUST00000038584	1421	1	ENSMUST00000019999	129616	-1	ENSMUST00000021467	3893	-1	ENSMUST00000022784	4973	-1	ENSMUST00000024802	7172	-1	ENSMUST00000026170	40783	-1	ENSMUST00000027795	66318	-1	ENSMUST00000029444	47648	-1	ENSMUST00000030811	8613	-1	ENSMUST00000032374	1276	-1	ENSMUST00000034094	8345	-1
ENSMUST00000038584	1463	1	ENSMUST00000019999	130016	-1	ENSMUST00000021467	3907	-1	ENSMUST00000022784	5071	-1	ENSMUST00000024802	7410	-1	ENSMUST00000026170	42134	-1	ENSMUST00000027795	68185	-1	ENSMUST00000029444	49738	-1	ENSMUST00000030811	881	-1	ENSMUST00000032374	1609	-1	ENSMUST00000034094	8360	-1
ENSMUST00000038584	1486	1	ENSMUST00000019999	13072	-1	ENSMUST00000021467	4771	-1	ENSMUST00000022784	5084	-1	ENSMUST00000024802	7792	-1	ENSMUST00000026170	4293	-1	ENSMUST00000027795	68949	-1	ENSMUST00000029444	50812	-1	ENSMUST00000030811	9019	-1	ENSMUST00000032374	1923	-1	ENSMUST00000034094	844	-1
ENSMUST00000038584	1510	1	ENSMUST00000019999	135344	-1	ENSMUST00000021467	4806	-1	ENSMUST00000022784	533	-1	ENSMUST00000024802	7810	-1	ENSMUST00000026170	43283	-1	ENSMUST00000027795	71494	-1	ENSMUST00000029444	5104	-1	ENSMUST00000030811	9891	-1	ENSMUST00000032374	2002	-1	ENSMUST00000034094	8472	-1
ENSMUST00000038584	1563	1	ENSMUST00000019999	145897	-1	ENSMUST00000021467	5835	-1	ENSMUST00000022784	546	-1	ENSMUST00000024802	7891	-1	ENSMUST00000026170	4335	-1	ENSMUST00000027795	72316	-1	ENSMUST00000029444	51122	-1	ENSMUST00000030816	10095	-1	ENSMUST00000032374	2036	-1	ENSMUST00000034094	9111	-1
ENSMUST00000038584	1583	1	ENSMUST00000019999	146835	-1	ENSMUST00000021467	6531	-1	ENSMUST00000022784	5464	-1	ENSMUST00000024802	8061	-1	ENSMUST00000026170	43409	-1	ENSMUST00000027795	72844	-1	ENSMUST00000029444	52714	-1	ENSMUST00000030816	10742	-1	ENSMUST00000032374	2103	-1	ENSMUST00000034094	9202	-1
ENSMUST00000038584	1621	1	ENSMUST00000019999	147258	-1	ENSMUST00000021467	6809	-1	ENSMUST00000022784	551	-1	ENSMUST00000024802	8209	-1	ENSMUST00000026170	44601	-1	ENSMUST00000027795	77485	-1	ENSMUST00000029444	54561	-1	ENSMUST00000030816	10938	-1	ENSMUST00000032374	2131	-1	ENSMUST00000034094	9480	-1
ENSMUST00000038584	1155	1	ENSMUST00000019999	151300	-1	ENSMUST00000021467	8212	-1	ENSMUST00000022784	5768	-1	ENSMUST00000024802	8738	-1	ENSMUST00000026170	44923	-1	ENSMUST00000027795	77829	-1	ENSMUST00000029444	55071	-1	ENSMUST00000030816	11181	-1	ENSMUST00000032374	2153	-1	ENSMUST00000034094	9580	-1
ENSMUST00000038584	1340	1	ENSMUST00000019999	155610	-1	ENSMUST00000021506	1054	-1	ENSMUST00000022784	5899	-1	ENSMUST00000024802	9001	-1	ENSMUST00000026170	45276	-1	ENSMUST00000027795	81681	-1	ENSMUST00000029444	57324	-1	ENSMUST00000030816	11385	-1	ENSMUST00000032374	2230	-1	ENSMUST00000034094	9639	-1
ENSMUST00000154704	34326	1	ENSMUST00000019999	15896	-1	ENSMUST00000021506	1063	-1	ENSMUST00000022784	6481	-1	ENSMUST00000024802	9112	-1	ENSMUST00000026170	46638	-1	ENSMUST00000027795	83669	-1	ENSMUST00000029444	57526	-1	ENSMUST00000030816	1168	-1	ENSMUST00000032374	2382	-1	ENSMUST00000034094	9682	-1
ENSMUST00000028403	20891	1	ENSMUST00000019999	1715	-1	ENSMUST00000021506	1178	-1	ENSMUST00000022784	6510	-1	ENSMUST00000024802	9406	-1	ENSMUST00000026170	48132	-1	ENSMUST00000027795	84321	-1	ENSMUST00000029444	57780	-1	ENSMUST00000030816	11899	-1	ENSMUST00000032374	2566	-1	ENSMUST00000034094	9766	-1
ENSMUST00000028403	24478	1	ENSMUST00000019999	23266	-1	ENSMUST00000021506	119	-1	ENSMUST00000022784	6765	-1	ENSMUST00000024802	9621	-1	ENSMUST00000026170	48924	-1	ENSMUST00000027795	86159	-1	ENSMUST00000029444	58211	-1	ENSMUST00000030816	1190	-1	ENSMUST00000032374	2580	-1	ENSMUST00000034096	1061	-1
ENSMUST00000028403	24714	1	ENSMUST00000019999	23478	-1	ENSMUST00000021506	1212	-1	ENSMUST00000022784	7250	-1	ENSMUST00000024802	9638	-1	ENSMUST00000026170	49095	-1	ENSMUST00000027795	86989	-1	ENSMUST00000029444	5839	-1	ENSMUST00000030816	12328	-1	ENSMUST00000032374	2609	-1	ENSMUST00000034096	1070	-1
ENSMUST00000151937	3842	1	ENSMUST00000019999	24247	-1	ENSMUST00000021506	1300	-1	ENSMUST00000022784	7259	-1	ENSMUST00000024802	9948	-1	ENSMUST00000026170	49453	-1	ENSMUST00000027795	88301	-1	ENSMUST00000029444	59380	-1	ENSMUST00000030816	12507	-1	ENSMUST00000032374	2646	-1	ENSMUST00000034096	1202	-1
ENSMUST00000151937	3873	1	ENSMUST00000019999	25092	-1	ENSMUST00000021506	1450	-1	ENSMUST00000022784	7415	-1	ENSMUST00000024811	1128	-1	ENSMUST00000026170	50941	-1	ENSMUST00000027795	9006	-1	ENSMUST00000029444	59428	-1	ENSMUST00000030816	1266	-1	ENSMUST00000032374	2674	-1	ENSMUST00000034096	1249	-1
ENSMUST00000037119	1273	1	ENSMUST00000019999	28943	-1	ENSMUST00000021506	1675	-1	ENSMUST00000022784	7588	-1	ENSMUST00000024811	1197	-1	ENSMUST00000026170	51265	-1	ENSMUST00000027795	90807	-1	ENSMUST00000029444	597	-1	ENSMUST00000030816	12682	-1	ENSMUST00000032374	2690	-1	ENSMUST00000034096	1318	-1
ENSMUST00000037119	2733	1	ENSMUST00000019999	3016	-1	ENSMUST00000021506	1767	-1	ENSMUST00000022784	7669	-1	ENSMUST00000024811	1212	-1	ENSMUST00000026170	51406	-1	ENSMUST00000027795	93319	-1	ENSMUST00000029444	60130	-1	ENSMUST00000030816	13066	-1	ENSMUST00000032374	2845	-1	ENSMUST00000034096	1408	-1
ENSMUST00000037119	2784	1	ENSMUST00000019999	32096	-1	ENSMUST00000021506	2046	-1	ENSMUST00000022784	7679	-1	ENSMUST00000024811	1396	-1	ENSMUST00000026170	51657	-1	ENSMUST00000027795	93419	-1	ENSMUST00000029444	63253	-1	ENSMUST00000030816	13135	-1	ENSMUST00000032374	287	-1	ENSMUST00000034096	1456	-1
ENSMUST00000037119	2821	1	ENSMUST00000019999	4023	-1	ENSMUST00000021506	2070	-1	ENSMUST00000022784	7765	-1	ENSMUST00000024811	1704	-1	ENSMUST00000026170	52163	-1	ENSMUST00000027795	95884	-1	ENSMUST00000029444	69255	-1	ENSMUST00000030816	13152	-1	ENSMUST00000032374	3021	-1	ENSMUST00000034096	1563	-1
ENSMUST00000037119	2836	1	ENSMUST00000019999	4029	-1	ENSMUST00000021506	2100	-1	ENSMUST00000022784	795	-1	ENSMUST00000024811	1991	-1	ENSMUST00000026170	5217	-1	ENSMUST00000027809	10076	-1	ENSMUST00000029444	70369	-1	ENSMUST00000030816	13301	-1	ENSMUST00000032374	3412	-1	ENSMUST00000034096	1610	-1
ENSMUST00000037119	3637	1	ENSMUST00000019999	46297	-1	ENSMUST00000021506	2387	-1	ENSMUST00000022784	8064	-1	ENSMUST00000024811	2007	-1	ENSMUST00000026170	6315	-1	ENSMUST00000027809	10136	-1	ENSMUST00000029444	7161	-1	ENSMUST00000030816	13400	-1	ENSMUST00000032374	3448	-1	ENSMUST00000034096	1730	-1
ENSMUST00000037119	4027	1	ENSMUST00000019999	47275	-1	ENSMUST00000021506	2518	-1	ENSMUST00000022784	8074	-1	ENSMUST00000024811	2014	-1	ENSMUST00000026170	6550	-1	ENSMUST00000027809	10872	-1	ENSMUST00000029444	72844	-1	ENSMUST00000030816	13458	-1	ENSMUST00000032374	3909	-1	ENSMUST00000034096	1808	-1
ENSMUST00000037119	4074	1	ENSMUST00000019999	5273	-1	ENSMUST00000021506	2529	-1	ENSMUST00000022784	8321	-1	ENSMUST00000024811	2208	-1	ENSMUST00000026170	7658	-1	ENSMUST00000027809	11174	-1	ENSMUST00000029444	7313	-1	ENSMUST00000030816	13666	-1	ENSMUST00000032374	3967	-1	ENSMUST00000034096	1839	-1
ENSMUST00000037119	4123	1	ENSMUST00000019999	5684	-1	ENSMUST00000021506	2818	-1	ENSMUST00000022784	8750	-1	ENSMUST00000024811	2229	-1	ENSMUST00000026170	8769	-1	ENSMUST00000027809	11307	-1	ENSMUST00000029444	75804	-1	ENSMUST00000030816	13802	-1	ENSMUST00000032374	4125	-1	ENSMUST00000034096	1875	-1
ENSMUST00000037119	4164	1	ENSMUST00000019999	5861	-1	ENSMUST00000021506	3244	-1	ENSMUST00000022784	9073	-1	ENSMUST00000024811	2411	-1	ENSMUST00000026188	10199	-1	ENSMUST00000027809	11902	-1	ENSMUST00000029444	77043	-1	ENSMUST00000030816	14139	-1	ENSMUST00000032374	4130	-1	ENSMUST00000034096	1880	-1
ENSMUST00000037119	4185	1	ENSMUST00000019999	60329	-1	ENSMUST00000021506	3416	-1	ENSMUST00000022784	9080	-1	ENSMUST00000024811	2649	-1	ENSMUST00000026188	10622	-1	ENSMUST00000027809	12549	-1	ENSMUST00000029444	77628	-1	ENSMUST00000030816	14181	-1	ENSMUST00000032374	4155	-1	ENSMUST00000034096	1887	-1
ENSMUST00000037119	4416	1	ENSMUST00000019999	65080	-1	ENSMUST00000021506	3431	-1	ENSMUST00000022784	978	-1	ENSMUST00000024811	2689	-1	ENSMUST00000026188	10736	-1	ENSMUST00000027809	12634	-1	ENSMUST00000029444	8662	-1	ENSMUST00000030816	14389	-1	ENSMUST00000032374	4182	-1	ENSMUST00000034096	2066	-1
ENSMUST00000037119	4700	1	ENSMUST00000019999	73344	-1	ENSMUST00000021506	3620	-1	ENSMUST00000022784	9807	-1	ENSMUST00000024811	2847	-1	ENSMUST00000026188	1193	-1	ENSMUST00000027809	13108	-1	ENSMUST00000029444	8812	-1	ENSMUST00000030816	15180	-1	ENSMUST00000032374	4195	-1	ENSMUST00000034096	2111	-1
ENSMUST00000037119	4739	1	ENSMUST00000019999	73839	-1	ENSMUST00000021506	3689	-1	ENSMUST00000022784	9869	-1	ENSMUST00000024811	2863	-1	ENSMUST00000026188	16118	-1	ENSMUST00000027809	13285	-1	ENSMUST00000029444	8874	-1	ENSMUST00000030816	1546	-1	ENSMUST00000032374	43	-1	ENSMUST00000034096	2132	-1
ENSMUST00000037119	4756	1	ENSMUST00000019999	74224	-1	ENSMUST00000021506	3740	-1	ENSMUST00000022784	9935	-1	ENSMUST00000024811	3004	-1	ENSMUST00000026188	16880	-1	ENSMUST00000027809	13853	-1	ENSMUST00000029447	1033	-1	ENSMUST00000030816	1550	-1	ENSMUST00000032374	4364	-1	ENSMUST00000034096	2264	-1
ENSMUST00000037119	4909	1	ENSMUST00000019999	74324	-1	ENSMUST00000021506	3887	-1	ENSMUST00000022786	1051	-1	ENSMUST00000024811	3075	-1	ENSMUST00000026188	18831	-1	ENSMUST00000027809	14174	-1	ENSMUST00000029447	1086	-1	ENSMUST00000030816	15695	-1	ENSMUST00000032374	4415	-1	ENSMUST00000034096	2320	-1
ENSMUST00000037119	5073	1	ENSMUST00000019999	75487	-1	ENSMUST00000021506	4076	-1	ENSMUST00000022786	115	-1	ENSMUST00000024811	3102	-1	ENSMUST00000026188	19542	-1	ENSMUST00000027809	14223	-1	ENSMUST00000029447	1161	-1	ENSMUST00000030816	15763	-1	ENSMUST00000032374	4443	-1	ENSMUST00000034096	2375	-1
ENSMUST00000037119	5170	1	ENSMUST00000019999	779	-1	ENSMUST00000021506	4203	-1	ENSMUST00000022786	1166	-1	ENSMUST00000024811	3122	-1	ENSMUST00000026188	19677	-1	ENSMUST00000027809	14591	-1	ENSMUST00000029447	1165	-1	ENSMUST00000030816	16053	-1	ENSMUST00000032374	4458	-1	ENSMUST00000034096	2412	-1
ENSMUST00000024159	1101	1	ENSMUST00000019999	78943	-1	ENSMUST00000021506	4503	-1	ENSMUST00000022786	12238	-1	ENSMUST00000024811	3237	-1	ENSMUST00000026188	19977	-1	ENSMUST00000027809	15227	-1	ENSMUST00000029447	1284	-1	ENSMUST00000030816	16280	-1	ENSMUST00000032374	4478	-1	ENSMUST00000034096	2416	-1
ENSMUST00000024159	1112	1	ENSMUST00000019999	79374	-1	ENSMUST00000021506	4594	-1	ENSMUST00000022786	12328	-1	ENSMUST00000024811	3253	-1	ENSMUST00000026188	20662	-1	ENSMUST00000027809	16028	-1	ENSMUST00000029447	1337	-1	ENSMUST00000030816	2334	-1	ENSMUST00000032374	4824	-1	ENSMUST00000034096	2576	-1
ENSMUST00000028522	69158	1	ENSMUST00000019999	87174	-1	ENSMUST00000021506	4638	-1	ENSMUST00000022786	12620	-1	ENSMUST00000024811	3500	-1	ENSMUST00000026188	26199	-1	ENSMUST00000027809	16968	-1	ENSMUST00000029447	1471	-1	ENSMUST00000030816	2363	-1	ENSMUST00000032374	487	-1	ENSMUST00000034096	2611	-1
ENSMUST00000028522	69239	1	ENSMUST00000019999	88464	-1	ENSMUST00000021506	4781	-1	ENSMUST00000022786	1281	-1	ENSMUST00000024811	3601	-1	ENSMUST00000026188	27370	-1	ENSMUST00000027809	1701	-1	ENSMUST00000029447	1625	-1	ENSMUST00000030816	2564	-1	ENSMUST00000032374	5328	-1	ENSMUST00000034096	2681	-1
ENSMUST00000006669	27764	1	ENSMUST00000019999	9184	-1	ENSMUST00000021506	4795	-1	ENSMUST00000022786	12958	-1	ENSMUST00000024811	3695	-1	ENSMUST00000026188	31760	-1	ENSMUST00000027809	17301	-1	ENSMUST00000029447	1666	-1	ENSMUST00000030816	2847	-1	ENSMUST00000032374	5408	-1	ENSMUST00000034096	2704	-1
ENSMUST00000171878	275118	1	ENSMUST00000019999	93278	-1	ENSMUST00000021506	4885	-1	ENSMUST00000022786	13153	-1	ENSMUST00000024811	3734	-1	ENSMUST00000026188	32066	-1	ENSMUST00000027809	17629	-1	ENSMUST00000029447	173	-1	ENSMUST00000030816	3147	-1	ENSMUST00000032374	542	-1	ENSMUST00000034096	2725	-1
ENSMUST00000171878	275319	1	ENSMUST00000019999	93952	-1	ENSMUST00000021506	4912	-1	ENSMUST00000022786	13579	-1	ENSMUST00000024811	3753	-1	ENSMUST00000026188	35657	-1	ENSMUST00000027809	17744	-1	ENSMUST00000029447	1732	-1	ENSMUST00000030816	3391	-1	ENSMUST00000032374	5490	-1	ENSMUST00000034096	2781	-1
ENSMUST00000171878	275238	1	ENSMUST00000019999	94532	-1	ENSMUST00000021506	5555	-1	ENSMUST00000022786	13667	-1	ENSMUST00000024811	3816	-1	ENSMUST00000026188	35897	-1	ENSMUST00000027809	19301	-1	ENSMUST00000029447	1879	-1	ENSMUST00000030816	3759	-1	ENSMUST00000032374	5661	-1	ENSMUST00000034096	2838	-1
ENSMUST00000102689	1738	1	ENSMUST00000019999	98355	-1	ENSMUST00000021506	574	-1	ENSMUST00000022786	1387	-1	ENSMUST00000024811	3851	-1	ENSMUST00000026188	36156	-1	ENSMUST00000027809	21146	-1	ENSMUST00000029447	1956	-1	ENSMUST00000030816	3955	-1	ENSMUST00000032374	5682	-1	ENSMUST00000034096	2963	-1
ENSMUST00000102689	33950	1	ENSMUST00000020017	11911	-1	ENSMUST00000021506	6130	-1	ENSMUST00000022786	14274	-1	ENSMUST00000024811	3962	-1	ENSMUST00000026188	36973	-1	ENSMUST00000027809	21196	-1	ENSMUST00000029447	2079	-1	ENSMUST00000030816	3990	-1	ENSMUST00000032374	5828	-1	ENSMUST00000034096	3054	-1
ENSMUST00000102689	33984	1	ENSMUST00000020017	13356	-1	ENSMUST00000021506	6228	-1	ENSMUST00000022786	14584	-1	ENSMUST00000024811	4026	-1	ENSMUST00000026188	37845	-1	ENSMUST00000027809	21526	-1	ENSMUST00000029447	3328	-1	ENSMUST00000030816	4003	-1	ENSMUST00000032374	584	-1	ENSMUST00000034096	363	-1
ENSMUST00000102689	34110	1	ENSMUST00000020017	13943	-1	ENSMUST00000021506	6308	-1	ENSMUST00000022786	14796	-1	ENSMUST00000024811	4035	-1	ENSMUST00000026188	3787	-1	ENSMUST00000027809	21755	-1	ENSMUST00000029447	3387	-1	ENSMUST00000030816	420	-1	ENSMUST00000032374	5951	-1	ENSMUST00000034096	592	-1
ENSMUST00000102689	34448	1	ENSMUST00000020017	14747	-1	ENSMUST00000021506	6369	-1	ENSMUST00000022786	15037	-1	ENSMUST00000024811	4049	-1	ENSMUST00000026188	37967	-1	ENSMUST00000027809	23183	-1	ENSMUST00000029447	366	-1	ENSMUST00000030816	4353	-1	ENSMUST00000032374	5975	-1	ENSMUST00000034096	618	-1
ENSMUST00000102689	34486	1	ENSMUST00000020017	1656	-1	ENSMUST00000021506	6435	-1	ENSMUST00000022786	15183	-1	ENSMUST00000024811	4088	-1	ENSMUST00000026188	38454	-1	ENSMUST00000027809	23356	-1	ENSMUST00000029447	3682	-1	ENSMUST00000030816	4628	-1	ENSMUST00000032374	5989	-1	ENSMUST00000034096	832	-1
ENSMUST00000102689	34534	1	ENSMUST00000020017	17364	-1	ENSMUST00000021506	6482	-1	ENSMUST00000022786	15336	-1	ENSMUST00000024811	4134	-1	ENSMUST00000026188	39682	-1	ENSMUST00000027809	24246	-1	ENSMUST00000029447	3948	-1	ENSMUST00000030816	4692	-1	ENSMUST00000032374	6206	-1	ENSMUST00000034096	898	-1
ENSMUST00000102689	34713	1	ENSMUST00000020017	1916	-1	ENSMUST00000021506	6578	-1	ENSMUST00000022786	16044	-1	ENSMUST00000024811	4214	-1	ENSMUST00000026188	40664	-1	ENSMUST00000027809	24369	-1	ENSMUST00000029447	4045	-1	ENSMUST00000030816	5288	-1	ENSMUST00000032374	623	-1	ENSMUST00000034096	930	-1
ENSMUST00000102689	1763	1	ENSMUST00000020017	19428	-1	ENSMUST00000021506	6717	-1	ENSMUST00000022786	16725	-1	ENSMUST00000024811	4232	-1	ENSMUST00000026188	42502	-1	ENSMUST00000027809	2481	-1	ENSMUST00000029447	4106	-1	ENSMUST00000030816	5466	-1	ENSMUST00000032374	6327	-1	ENSMUST00000034096	958	-1
ENSMUST00000102689	33991	1	ENSMUST00000020017	1979	-1	ENSMUST00000021506	6886	-1	ENSMUST00000022786	17054	-1	ENSMUST00000024811	4282	-1	ENSMUST00000026188	43889	-1	ENSMUST00000027809	24831	-1	ENSMUST00000029447	4155	-1	ENSMUST00000030816	591	-1	ENSMUST00000032374	6371	-1	ENSMUST00000034096	999	-1
ENSMUST00000102689	34002	1	ENSMUST00000020017	21428	-1	ENSMUST00000021506	703	-1	ENSMUST00000022786	17188	-1	ENSMUST00000024811	4305	-1	ENSMUST00000026188	44820	-1	ENSMUST00000027809	25625	-1	ENSMUST00000029447	4187	-1	ENSMUST00000030816	608	-1	ENSMUST00000032374	833	-1	ENSMUST00000034111	101449	-1
ENSMUST00000102689	34008	1	ENSMUST00000020017	21477	-1	ENSMUST00000021506	7235	-1	ENSMUST00000022786	17400	-1	ENSMUST00000024811	4364	-1	ENSMUST00000026188	45239	-1	ENSMUST00000027809	25642	-1	ENSMUST00000029447	4410	-1	ENSMUST00000030816	7004	-1	ENSMUST00000032386	1102	-1	ENSMUST00000034111	102882	-1
ENSMUST00000090813	2416	1	ENSMUST00000020017	21574	-1	ENSMUST00000021506	7266	-1	ENSMUST00000022786	17548	-1	ENSMUST00000024811	4421	-1	ENSMUST00000026188	46298	-1	ENSMUST00000027809	25809	-1	ENSMUST00000029447	457	-1	ENSMUST00000030816	7286	-1	ENSMUST00000032386	1120	-1	ENSMUST00000034111	105584	-1
ENSMUST00000090813	3146	1	ENSMUST00000020017	22769	-1	ENSMUST00000021506	7492	-1	ENSMUST00000022786	17796	-1	ENSMUST00000024811	4602	-1	ENSMUST00000026188	46389	-1	ENSMUST00000027809	26093	-1	ENSMUST00000029447	514	-1	ENSMUST00000030816	7732	-1	ENSMUST00000032386	1127	-1	ENSMUST00000034111	10991	-1
ENSMUST00000090811	7046	1	ENSMUST00000020017	22996	-1	ENSMUST00000021506	7589	-1	ENSMUST00000022786	1795	-1	ENSMUST00000024811	689	-1	ENSMUST00000026188	4674	-1	ENSMUST00000027809	26224	-1	ENSMUST00000029447	5272	-1	ENSMUST00000030816	8181	-1	ENSMUST00000032386	1168	-1	ENSMUST00000034111	117771	-1
ENSMUST00000090811	7946	1	ENSMUST00000020017	24702	-1	ENSMUST00000021506	963	-1	ENSMUST00000022786	18663	-1	ENSMUST00000024811	734	-1	ENSMUST00000026188	47093	-1	ENSMUST00000027809	26271	-1	ENSMUST00000029447	529	-1	ENSMUST00000030816	849	-1	ENSMUST00000032386	1389	-1	ENSMUST00000034111	123705	-1
ENSMUST00000076463	1957	1	ENSMUST00000020017	2510	-1	ENSMUST00000021522	1412	-1	ENSMUST00000022786	18707	-1	ENSMUST00000024811	781	-1	ENSMUST00000026188	47530	-1	ENSMUST00000027809	27329	-1	ENSMUST00000029447	5506	-1	ENSMUST00000030816	8570	-1	ENSMUST00000032386	192	-1	ENSMUST00000034111	123989	-1
ENSMUST00000076463	2141	1	ENSMUST00000020017	27368	-1	ENSMUST00000021522	1469	-1	ENSMUST00000022786	1920	-1	ENSMUST00000024811	909	-1	ENSMUST00000026188	47706	-1	ENSMUST00000027809	27840	-1	ENSMUST00000029447	5537	-1	ENSMUST00000030816	9115	-1	ENSMUST00000032386	1931	-1	ENSMUST00000034111	127998	-1
ENSMUST00000112024	2411	1	ENSMUST00000020017	27695	-1	ENSMUST00000021522	1482	-1	ENSMUST00000022786	19242	-1	ENSMUST00000024811	985	-1	ENSMUST00000026188	48635	-1	ENSMUST00000027809	28835	-1	ENSMUST00000029447	5651	-1	ENSMUST00000030816	9352	-1	ENSMUST00000032386	2108	-1	ENSMUST00000034111	137730	-1
ENSMUST00000100009	2393	1	ENSMUST00000020017	27936	-1	ENSMUST00000021522	1512	-1	ENSMUST00000022786	1936	-1	ENSMUST00000024816	10491	-1	ENSMUST00000026188	48903	-1	ENSMUST00000027809	28903	-1	ENSMUST00000029447	5673	-1	ENSMUST00000030816	9646	-1	ENSMUST00000032386	2211	-1	ENSMUST00000034111	139082	-1
ENSMUST00000053932	20601	1	ENSMUST00000020017	29403	-1	ENSMUST00000021522	1686	-1	ENSMUST00000022786	19819	-1	ENSMUST00000024816	11275	-1	ENSMUST00000026188	50127	-1	ENSMUST00000027809	29243	-1	ENSMUST00000029447	5688	-1	ENSMUST00000030816	9965	-1	ENSMUST00000032386	2403	-1	ENSMUST00000034111	140543	-1
ENSMUST00000102672	729	1	ENSMUST00000020017	29549	-1	ENSMUST00000021522	1760	-1	ENSMUST00000022786	20625	-1	ENSMUST00000024816	11385	-1	ENSMUST00000026188	50493	-1	ENSMUST00000027809	30150	-1	ENSMUST00000029447	5834	-1	ENSMUST00000030826	10186	-1	ENSMUST00000032386	255	-1	ENSMUST00000034111	143184	-1
ENSMUST00000102672	932	1	ENSMUST00000020017	29955	-1	ENSMUST00000021522	1795	-1	ENSMUST00000022786	20909	-1	ENSMUST00000024816	13386	-1	ENSMUST00000026188	50677	-1	ENSMUST00000027809	3174	-1	ENSMUST00000029447	5995	-1	ENSMUST00000030826	10521	-1	ENSMUST00000032386	2708	-1	ENSMUST00000034111	147423	-1
ENSMUST00000102672	936	1	ENSMUST00000020017	30973	-1	ENSMUST00000021522	2010	-1	ENSMUST00000022786	20956	-1	ENSMUST00000024816	14379	-1	ENSMUST00000026188	51495	-1	ENSMUST00000027809	3904	-1	ENSMUST00000029447	6071	-1	ENSMUST00000030826	10759	-1	ENSMUST00000032386	279	-1	ENSMUST00000034111	150544	-1
ENSMUST00000102672	1248	1	ENSMUST00000020017	335	-1	ENSMUST00000021522	2038	-1	ENSMUST00000022786	2136	-1	ENSMUST00000024816	15252	-1	ENSMUST00000026188	52477	-1	ENSMUST00000027809	4767	-1	ENSMUST00000029447	6171	-1	ENSMUST00000030826	11009	-1	ENSMUST00000032386	3011	-1	ENSMUST00000034111	15493	-1
ENSMUST00000102672	1596	1	ENSMUST00000020017	34093	-1	ENSMUST00000021522	2154	-1	ENSMUST00000022786	21442	-1	ENSMUST00000024816	15486	-1	ENSMUST00000026188	53105	-1	ENSMUST00000027809	6312	-1	ENSMUST00000029447	6242	-1	ENSMUST00000030826	11108	-1	ENSMUST00000032386	3386	-1	ENSMUST00000034111	157593	-1
ENSMUST00000102672	3813	1	ENSMUST00000020017	34507	-1	ENSMUST00000021522	2538	-1	ENSMUST00000022786	21628	-1	ENSMUST00000024816	16015	-1	ENSMUST00000026188	53760	-1	ENSMUST00000027809	6755	-1	ENSMUST00000029447	6291	-1	ENSMUST00000030826	1124	-1	ENSMUST00000032386	3723	-1	ENSMUST00000034111	159155	-1
ENSMUST00000102672	3837	1	ENSMUST00000020017	35768	-1	ENSMUST00000021522	2655	-1	ENSMUST00000022786	22241	-1	ENSMUST00000024816	16028	-1	ENSMUST00000026188	55342	-1	ENSMUST00000027809	6828	-1	ENSMUST00000029447	6332	-1	ENSMUST00000030826	11793	-1	ENSMUST00000032386	4017	-1	ENSMUST00000034111	163558	-1
ENSMUST00000099996	689	1	ENSMUST00000020017	36238	-1	ENSMUST00000021522	2818	-1	ENSMUST00000022786	237	-1	ENSMUST00000024816	16192	-1	ENSMUST00000026188	55643	-1	ENSMUST00000027809	7000	-1	ENSMUST00000029447	6373	-1	ENSMUST00000030826	1261	-1	ENSMUST00000032386	4202	-1	ENSMUST00000034111	165854	-1
ENSMUST00000099996	1242	1	ENSMUST00000020017	37297	-1	ENSMUST00000021522	2989	-1	ENSMUST00000022786	2787	-1	ENSMUST00000024816	1656	-1	ENSMUST00000026188	56652	-1	ENSMUST00000027809	7270	-1	ENSMUST00000029447	6676	-1	ENSMUST00000030826	1321	-1	ENSMUST00000032386	4587	-1	ENSMUST00000034111	166833	-1
ENSMUST00000099996	1390	1	ENSMUST00000020017	37891	-1	ENSMUST00000021522	3110	-1	ENSMUST00000022786	2938	-1	ENSMUST00000024816	16610	-1	ENSMUST00000026188	58222	-1	ENSMUST00000027809	7379	-1	ENSMUST00000029447	6811	-1	ENSMUST00000030826	13379	-1	ENSMUST00000032386	4635	-1	ENSMUST00000034111	169965	-1
ENSMUST00000099996	1415	1	ENSMUST00000020017	38178	-1	ENSMUST00000021522	3133	-1	ENSMUST00000022786	3123	-1	ENSMUST00000024816	16790	-1	ENSMUST00000026188	60890	-1	ENSMUST00000027809	8435	-1	ENSMUST00000029447	6844	-1	ENSMUST00000030826	13399	-1	ENSMUST00000032386	4690	-1	ENSMUST00000034111	178365	-1
ENSMUST00000099994	776	1	ENSMUST00000020017	39241	-1	ENSMUST00000021522	3593	-1	ENSMUST00000022786	4302	-1	ENSMUST00000024816	17056	-1	ENSMUST00000026188	64174	-1	ENSMUST00000027809	9649	-1	ENSMUST00000029447	6998	-1	ENSMUST00000030826	13696	-1	ENSMUST00000032386	4740	-1	ENSMUST00000034111	181526	-1
ENSMUST00000099994	1839	1	ENSMUST00000020017	39461	-1	ENSMUST00000021522	3626	-1	ENSMUST00000022786	435	-1	ENSMUST00000024816	17089	-1	ENSMUST00000026188	64733	-1	ENSMUST00000027809	9655	-1	ENSMUST00000029447	7291	-1	ENSMUST00000030826	13763	-1	ENSMUST00000032386	4837	-1	ENSMUST00000034111	186540	-1
ENSMUST00000111929	189426	1	ENSMUST00000020017	40344	-1	ENSMUST00000021522	3742	-1	ENSMUST00000022786	4418	-1	ENSMUST00000024816	17650	-1	ENSMUST00000026188	65017	-1	ENSMUST00000027824	1049	-1	ENSMUST00000029447	7920	-1	ENSMUST00000030826	14173	-1	ENSMUST00000032386	4875	-1	ENSMUST00000034111	192194	-1
ENSMUST00000111929	189446	1	ENSMUST00000020017	40415	-1	ENSMUST00000021522	3837	-1	ENSMUST00000022786	4431	-1	ENSMUST00000024816	18132	-1	ENSMUST00000026188	65548	-1	ENSMUST00000027824	108	-1	ENSMUST00000029447	7933	-1	ENSMUST00000030826	14309	-1	ENSMUST00000032386	4882	-1	ENSMUST00000034111	200991	-1
ENSMUST00000111929	189766	1	ENSMUST00000020017	4110	-1	ENSMUST00000021522	3913	-1	ENSMUST00000022786	4936	-1	ENSMUST00000024816	18367	-1	ENSMUST00000026188	66819	-1	ENSMUST00000027824	137	-1	ENSMUST00000029447	801	-1	ENSMUST00000030826	14594	-1	ENSMUST00000032386	4947	-1	ENSMUST00000034111	203192	-1
ENSMUST00000111929	192690	1	ENSMUST00000020017	42849	-1	ENSMUST00000021522	3940	-1	ENSMUST00000022786	5993	-1	ENSMUST00000024816	18920	-1	ENSMUST00000026188	67052	-1	ENSMUST00000027824	161	-1	ENSMUST00000029447	854	-1	ENSMUST00000030826	1465	-1	ENSMUST00000032386	4955	-1	ENSMUST00000034111	204224	-1
ENSMUST00000111929	193457	1	ENSMUST00000020017	43319	-1	ENSMUST00000021522	3998	-1	ENSMUST00000022786	6096	-1	ENSMUST00000024816	19272	-1	ENSMUST00000026188	67404	-1	ENSMUST00000027824	172	-1	ENSMUST00000029447	874	-1	ENSMUST00000030826	14818	-1	ENSMUST00000032386	4975	-1	ENSMUST00000034111	213878	-1
ENSMUST00000049544	690	1	ENSMUST00000020017	44390	-1	ENSMUST00000021522	4225	-1	ENSMUST00000022786	6584	-1	ENSMUST00000024816	19329	-1	ENSMUST00000026188	67736	-1	ENSMUST00000027824	231	-1	ENSMUST00000029447	970	-1	ENSMUST00000030826	15068	-1	ENSMUST00000032386	5018	-1	ENSMUST00000034111	216225	-1
ENSMUST00000111831	490	1	ENSMUST00000020017	45247	-1	ENSMUST00000021522	4333	-1	ENSMUST00000022786	6627	-1	ENSMUST00000024816	20384	-1	ENSMUST00000026188	70044	-1	ENSMUST00000027824	345	-1	ENSMUST00000029459	10326	-1	ENSMUST00000030826	15206	-1	ENSMUST00000032386	5072	-1	ENSMUST00000034111	219318	-1
ENSMUST00000028398	0	1	ENSMUST00000020017	45430	-1	ENSMUST00000021522	4354	-1	ENSMUST00000022786	6813	-1	ENSMUST00000024816	2174	-1	ENSMUST00000026188	70861	-1	ENSMUST00000027824	386	-1	ENSMUST00000029459	10427	-1	ENSMUST00000030826	15218	-1	ENSMUST00000032386	5186	-1	ENSMUST00000034111	23536	-1
ENSMUST00000028395	72513	1	ENSMUST00000020017	45850	-1	ENSMUST00000021522	4372	-1	ENSMUST00000022786	7113	-1	ENSMUST00000024816	22027	-1	ENSMUST00000026188	72034	-1	ENSMUST00000027824	452	-1	ENSMUST00000029459	11876	-1	ENSMUST00000030826	15231	-1	ENSMUST00000032386	5360	-1	ENSMUST00000034111	24181	-1
ENSMUST00000041099	1391	1	ENSMUST00000020017	4641	-1	ENSMUST00000021522	4389	-1	ENSMUST00000022786	7428	-1	ENSMUST00000024816	22573	-1	ENSMUST00000026188	72302	-1	ENSMUST00000027824	462	-1	ENSMUST00000029459	12186	-1	ENSMUST00000030826	16035	-1	ENSMUST00000032386	5646	-1	ENSMUST00000034111	26508	-1
ENSMUST00000041099	1709	1	ENSMUST00000020017	47005	-1	ENSMUST00000021522	4570	-1	ENSMUST00000022786	7921	-1	ENSMUST00000024816	24400	-1	ENSMUST00000026196	10412	-1	ENSMUST00000027824	510	-1	ENSMUST00000029459	12326	-1	ENSMUST00000030826	16313	-1	ENSMUST00000032386	5660	-1	ENSMUST00000034111	2788	-1
ENSMUST00000041099	1730	1	ENSMUST00000020017	47454	-1	ENSMUST00000021522	4606	-1	ENSMUST00000022786	795	-1	ENSMUST00000024816	25764	-1	ENSMUST00000026196	11401	-1	ENSMUST00000027824	565	-1	ENSMUST00000029459	12821	-1	ENSMUST00000030826	16712	-1	ENSMUST00000032386	584	-1	ENSMUST00000034111	30817	-1
ENSMUST00000041099	1938	1	ENSMUST00000020017	48092	-1	ENSMUST00000021522	4652	-1	ENSMUST00000022786	7995	-1	ENSMUST00000024816	26151	-1	ENSMUST00000026196	11510	-1	ENSMUST00000027824	739	-1	ENSMUST00000029459	14045	-1	ENSMUST00000030826	16925	-1	ENSMUST00000032386	59	-1	ENSMUST00000034111	3328	-1
ENSMUST00000028393	22213	1	ENSMUST00000020017	48513	-1	ENSMUST00000021522	4690	-1	ENSMUST00000022786	9358	-1	ENSMUST00000024816	26312	-1	ENSMUST00000026196	11544	-1	ENSMUST00000027824	753	-1	ENSMUST00000029459	15321	-1	ENSMUST00000030826	17313	-1	ENSMUST00000032386	5918	-1	ENSMUST00000034111	34213	-1
ENSMUST00000028393	22705	1	ENSMUST00000020017	4925	-1	ENSMUST00000021522	4961	-1	ENSMUST00000022786	9580	-1	ENSMUST00000024816	27809	-1	ENSMUST00000026196	12189	-1	ENSMUST00000027824	819	-1	ENSMUST00000029459	15330	-1	ENSMUST00000030826	17369	-1	ENSMUST00000032386	5980	-1	ENSMUST00000034111	35046	-1
ENSMUST00000102655	117	1	ENSMUST00000020017	49778	-1	ENSMUST00000021522	506	-1	ENSMUST00000022793	11604	-1	ENSMUST00000024816	2885	-1	ENSMUST00000026196	12804	-1	ENSMUST00000027824	82	-1	ENSMUST00000029459	15502	-1	ENSMUST00000030826	17912	-1	ENSMUST00000032386	6070	-1	ENSMUST00000034111	38724	-1
ENSMUST00000102655	1476	1	ENSMUST00000020017	50227	-1	ENSMUST00000021522	5103	-1	ENSMUST00000022793	13124	-1	ENSMUST00000024816	29895	-1	ENSMUST00000026196	12830	-1	ENSMUST00000027824	830	-1	ENSMUST00000029459	15668	-1	ENSMUST00000030826	18147	-1	ENSMUST00000032386	6080	-1	ENSMUST00000034111	38937	-1
ENSMUST00000102655	2010	1	ENSMUST00000020017	51322	-1	ENSMUST00000021522	5111	-1	ENSMUST00000022793	14017	-1	ENSMUST00000024816	30500	-1	ENSMUST00000026196	12974	-1	ENSMUST00000027824	840	-1	ENSMUST00000029459	16040	-1	ENSMUST00000030826	19210	-1	ENSMUST00000032386	6091	-1	ENSMUST00000034111	44800	-1
ENSMUST00000028392	1913	1	ENSMUST00000020017	51964	-1	ENSMUST00000021522	5305	-1	ENSMUST00000022793	15370	-1	ENSMUST00000024816	30885	-1	ENSMUST00000026196	13527	-1	ENSMUST00000027824	903	-1	ENSMUST00000029459	16127	-1	ENSMUST00000030826	19304	-1	ENSMUST00000032386	6233	-1	ENSMUST00000034111	45132	-1
ENSMUST00000028392	37724	1	ENSMUST00000020017	53408	-1	ENSMUST00000021522	5594	-1	ENSMUST00000022793	16511	-1	ENSMUST00000024816	30975	-1	ENSMUST00000026196	13657	-1	ENSMUST00000027824	967	-1	ENSMUST00000029459	16533	-1	ENSMUST00000030826	19341	-1	ENSMUST00000032386	6253	-1	ENSMUST00000034111	4598	-1
ENSMUST00000028392	37744	1	ENSMUST00000020017	5460	-1	ENSMUST00000021522	5741	-1	ENSMUST00000022793	18390	-1	ENSMUST00000024816	31072	-1	ENSMUST00000026196	14129	-1	ENSMUST00000027824	976	-1	ENSMUST00000029459	16839	-1	ENSMUST00000030826	19754	-1	ENSMUST00000032386	6511	-1	ENSMUST00000034111	46410	-1
ENSMUST00000028389	1349	1	ENSMUST00000020017	5604	-1	ENSMUST00000021522	5782	-1	ENSMUST00000022793	18759	-1	ENSMUST00000024816	31996	-1	ENSMUST00000026196	14291	-1	ENSMUST00000027826	1093	-1	ENSMUST00000029459	17307	-1	ENSMUST00000030826	20921	-1	ENSMUST00000032386	6569	-1	ENSMUST00000034111	46451	-1
ENSMUST00000047527	203160	1	ENSMUST00000020017	6969	-1	ENSMUST00000021522	5894	-1	ENSMUST00000022793	19108	-1	ENSMUST00000024816	33815	-1	ENSMUST00000026196	14684	-1	ENSMUST00000027826	1120	-1	ENSMUST00000029459	17387	-1	ENSMUST00000030826	20988	-1	ENSMUST00000032386	6849	-1	ENSMUST00000034111	46715	-1
ENSMUST00000047527	203852	1	ENSMUST00000020017	7191	-1	ENSMUST00000021522	5911	-1	ENSMUST00000022793	19230	-1	ENSMUST00000024816	33898	-1	ENSMUST00000026196	14741	-1	ENSMUST00000027826	1292	-1	ENSMUST00000029459	19233	-1	ENSMUST00000030826	2185	-1	ENSMUST00000032386	7043	-1	ENSMUST00000034111	52577	-1
ENSMUST00000047527	204114	1	ENSMUST00000020017	7217	-1	ENSMUST00000021522	5942	-1	ENSMUST00000022793	20177	-1	ENSMUST00000024816	34951	-1	ENSMUST00000026196	15173	-1	ENSMUST00000027826	1326	-1	ENSMUST00000029459	19624	-1	ENSMUST00000030826	2221	-1	ENSMUST00000032386	7182	-1	ENSMUST00000034111	58235	-1
ENSMUST00000047527	204747	1	ENSMUST00000020017	8150	-1	ENSMUST00000021522	6116	-1	ENSMUST00000022793	20383	-1	ENSMUST00000024816	35466	-1	ENSMUST00000026196	15707	-1	ENSMUST00000027826	1337	-1	ENSMUST00000029459	19708	-1	ENSMUST00000030826	23007	-1	ENSMUST00000032386	7300	-1	ENSMUST00000034111	63657	-1
ENSMUST00000047527	205284	1	ENSMUST00000020027	10793	-1	ENSMUST00000021522	6133	-1	ENSMUST00000022793	20393	-1	ENSMUST00000024816	36497	-1	ENSMUST00000026196	15719	-1	ENSMUST00000027826	1397	-1	ENSMUST00000029459	20559	-1	ENSMUST00000030826	23839	-1	ENSMUST00000032386	7312	-1	ENSMUST00000034111	68726	-1
ENSMUST00000047527	205308	1	ENSMUST00000020027	11370	-1	ENSMUST00000021522	6250	-1	ENSMUST00000022793	20680	-1	ENSMUST00000024816	37078	-1	ENSMUST00000026196	15930	-1	ENSMUST00000027826	1428	-1	ENSMUST00000029459	21931	-1	ENSMUST00000030826	24193	-1	ENSMUST00000032398	10064	-1	ENSMUST00000034111	7611	-1
ENSMUST00000047527	205348	1	ENSMUST00000020027	11734	-1	ENSMUST00000021522	6256	-1	ENSMUST00000022793	20876	-1	ENSMUST00000024816	37159	-1	ENSMUST00000026196	15970	-1	ENSMUST00000027826	146	-1	ENSMUST00000029459	22178	-1	ENSMUST00000030826	24560	-1	ENSMUST00000032398	10121	-1	ENSMUST00000034111	78223	-1
ENSMUST00000047527	205369	1	ENSMUST00000020027	12265	-1	ENSMUST00000021522	6819	-1	ENSMUST00000022793	21791	-1	ENSMUST00000024816	37434	-1	ENSMUST00000026196	16124	-1	ENSMUST00000027826	1490	-1	ENSMUST00000029459	23051	-1	ENSMUST00000030826	2810	-1	ENSMUST00000032398	10508	-1	ENSMUST00000034111	85223	-1
ENSMUST00000047527	205385	1	ENSMUST00000020027	12303	-1	ENSMUST00000021522	7659	-1	ENSMUST00000022793	22856	-1	ENSMUST00000024816	37760	-1	ENSMUST00000026196	16194	-1	ENSMUST00000027826	1512	-1	ENSMUST00000029459	23675	-1	ENSMUST00000030826	4007	-1	ENSMUST00000032398	10681	-1	ENSMUST00000034111	85821	-1
ENSMUST00000047527	205417	1	ENSMUST00000020027	1268	-1	ENSMUST00000021522	7746	-1	ENSMUST00000022793	24518	-1	ENSMUST00000024816	38833	-1	ENSMUST00000026196	16403	-1	ENSMUST00000027826	1522	-1	ENSMUST00000029459	24007	-1	ENSMUST00000030826	4373	-1	ENSMUST00000032398	10907	-1	ENSMUST00000034111	86938	-1
ENSMUST00000047527	205424	1	ENSMUST00000020027	12798	-1	ENSMUST00000021522	776	-1	ENSMUST00000022793	24539	-1	ENSMUST00000024816	39297	-1	ENSMUST00000026196	16698	-1	ENSMUST00000027826	1582	-1	ENSMUST00000029459	24115	-1	ENSMUST00000030826	4501	-1	ENSMUST00000032398	10977	-1	ENSMUST00000034111	87656	-1
ENSMUST00000047527	205459	1	ENSMUST00000020027	12881	-1	ENSMUST00000021522	7977	-1	ENSMUST00000022793	24857	-1	ENSMUST00000024816	39695	-1	ENSMUST00000026196	17564	-1	ENSMUST00000027826	1617	-1	ENSMUST00000029459	24668	-1	ENSMUST00000030826	4559	-1	ENSMUST00000032398	10984	-1	ENSMUST00000034111	93434	-1
ENSMUST00000047527	206001	1	ENSMUST00000020027	12981	-1	ENSMUST00000021522	8086	-1	ENSMUST00000022793	25250	-1	ENSMUST00000024816	39778	-1	ENSMUST00000026196	17840	-1	ENSMUST00000027826	1700	-1	ENSMUST00000029459	25027	-1	ENSMUST00000030826	5185	-1	ENSMUST00000032398	11704	-1	ENSMUST00000034111	93706	-1
ENSMUST00000047527	206293	1	ENSMUST00000020027	1313	-1	ENSMUST00000021522	8111	-1	ENSMUST00000022793	25709	-1	ENSMUST00000024816	41099	-1	ENSMUST00000026196	18502	-1	ENSMUST00000027826	1758	-1	ENSMUST00000029459	25305	-1	ENSMUST00000030826	5288	-1	ENSMUST00000032398	11916	-1	ENSMUST00000034111	95637	-1
ENSMUST00000047527	206326	1	ENSMUST00000020027	13316	-1	ENSMUST00000021522	8199	-1	ENSMUST00000022793	25948	-1	ENSMUST00000024816	41171	-1	ENSMUST00000026196	18811	-1	ENSMUST00000027826	1775	-1	ENSMUST00000029459	25584	-1	ENSMUST00000030826	5362	-1	ENSMUST00000032398	12027	-1	ENSMUST00000034111	95745	-1
ENSMUST00000081591	19617	1	ENSMUST00000020027	13607	-1	ENSMUST00000021522	863	-1	ENSMUST00000022793	27515	-1	ENSMUST00000024816	42859	-1	ENSMUST00000026196	19328	-1	ENSMUST00000027826	2079	-1	ENSMUST00000029459	25706	-1	ENSMUST00000030826	5544	-1	ENSMUST00000032398	12493	-1	ENSMUST00000034111	95761	-1
ENSMUST00000028499	79016	1	ENSMUST00000020027	13635	-1	ENSMUST00000021530	10098	-1	ENSMUST00000022793	2812	-1	ENSMUST00000024816	4293	-1	ENSMUST00000026196	19336	-1	ENSMUST00000027826	2127	-1	ENSMUST00000029459	27183	-1	ENSMUST00000030826	5565	-1	ENSMUST00000032398	13332	-1	ENSMUST00000034111	96086	-1
ENSMUST00000028499	79462	1	ENSMUST00000020027	13747	-1	ENSMUST00000021530	10422	-1	ENSMUST00000022793	28163	-1	ENSMUST00000024816	45367	-1	ENSMUST00000026196	19511	-1	ENSMUST00000027826	2143	-1	ENSMUST00000029459	27514	-1	ENSMUST00000030826	6562	-1	ENSMUST00000032398	13565	-1	ENSMUST00000034111	99162	-1
ENSMUST00000051454	67077	1	ENSMUST00000020027	13821	-1	ENSMUST00000021530	10777	-1	ENSMUST00000022793	29065	-1	ENSMUST00000024816	4846	-1	ENSMUST00000026196	1997	-1	ENSMUST00000027826	2191	-1	ENSMUST00000029459	27854	-1	ENSMUST00000030826	688	-1	ENSMUST00000032398	13741	-1	ENSMUST00000034115	1032	-1
ENSMUST00000051454	67449	1	ENSMUST00000020027	13977	-1	ENSMUST00000021530	10808	-1	ENSMUST00000022793	29768	-1	ENSMUST00000024816	4950	-1	ENSMUST00000026196	20894	-1	ENSMUST00000027826	230	-1	ENSMUST00000029459	28541	-1	ENSMUST00000030826	6982	-1	ENSMUST00000032398	13779	-1	ENSMUST00000034115	105	-1
ENSMUST00000051454	67551	1	ENSMUST00000020027	14328	-1	ENSMUST00000021530	11676	-1	ENSMUST00000022793	29931	-1	ENSMUST00000024816	5566	-1	ENSMUST00000026196	21582	-1	ENSMUST00000027826	244	-1	ENSMUST00000029459	28704	-1	ENSMUST00000030826	7361	-1	ENSMUST00000032398	1405	-1	ENSMUST00000034115	1356	-1
ENSMUST00000051454	67812	1	ENSMUST00000020027	15137	-1	ENSMUST00000021530	11887	-1	ENSMUST00000022793	30005	-1	ENSMUST00000024816	5653	-1	ENSMUST00000026196	21918	-1	ENSMUST00000027826	286	-1	ENSMUST00000029459	29501	-1	ENSMUST00000030826	8156	-1	ENSMUST00000032398	14306	-1	ENSMUST00000034115	1440	-1
ENSMUST00000051454	67881	1	ENSMUST00000020027	15273	-1	ENSMUST00000021530	12095	-1	ENSMUST00000022793	3077	-1	ENSMUST00000024816	7500	-1	ENSMUST00000026196	21950	-1	ENSMUST00000027826	308	-1	ENSMUST00000029459	31416	-1	ENSMUST00000030826	8423	-1	ENSMUST00000032398	1434	-1	ENSMUST00000034115	1449	-1
ENSMUST00000051454	67899	1	ENSMUST00000020027	15419	-1	ENSMUST00000021530	12192	-1	ENSMUST00000022793	32745	-1	ENSMUST00000024816	9074	-1	ENSMUST00000026196	2246	-1	ENSMUST00000027826	34	-1	ENSMUST00000029459	32060	-1	ENSMUST00000030826	8629	-1	ENSMUST00000032398	14548	-1	ENSMUST00000034115	1502	-1
ENSMUST00000051454	68218	1	ENSMUST00000020027	15767	-1	ENSMUST00000021530	12245	-1	ENSMUST00000022793	33171	-1	ENSMUST00000024816	9710	-1	ENSMUST00000026196	22586	-1	ENSMUST00000027826	474	-1	ENSMUST00000029459	3620	-1	ENSMUST00000030826	9168	-1	ENSMUST00000032398	14896	-1	ENSMUST00000034115	1912	-1
ENSMUST00000051454	68682	1	ENSMUST00000020027	15942	-1	ENSMUST00000021530	13018	-1	ENSMUST00000022793	33706	-1	ENSMUST00000024816	9854	-1	ENSMUST00000026196	22861	-1	ENSMUST00000027826	504	-1	ENSMUST00000029459	37450	-1	ENSMUST00000030830	10564	-1	ENSMUST00000032398	15187	-1	ENSMUST00000034115	1958	-1
ENSMUST00000074262	2920	1	ENSMUST00000020027	16116	-1	ENSMUST00000021530	13453	-1	ENSMUST00000022793	34756	-1	ENSMUST00000024829	1001	-1	ENSMUST00000026196	22878	-1	ENSMUST00000027826	516	-1	ENSMUST00000029459	38333	-1	ENSMUST00000030830	10671	-1	ENSMUST00000032398	15203	-1	ENSMUST00000034115	2010	-1
ENSMUST00000074262	2941	1	ENSMUST00000020027	16284	-1	ENSMUST00000021530	14738	-1	ENSMUST00000022793	35309	-1	ENSMUST00000024829	10823	-1	ENSMUST00000026196	23898	-1	ENSMUST00000027826	716	-1	ENSMUST00000029459	3906	-1	ENSMUST00000030830	11019	-1	ENSMUST00000032398	15910	-1	ENSMUST00000034115	202	-1
ENSMUST00000074262	2951	1	ENSMUST00000020027	16318	-1	ENSMUST00000021530	15856	-1	ENSMUST00000022793	36419	-1	ENSMUST00000024829	10879	-1	ENSMUST00000026196	24292	-1	ENSMUST00000027826	722	-1	ENSMUST00000029459	39256	-1	ENSMUST00000030830	1199	-1	ENSMUST00000032398	16050	-1	ENSMUST00000034115	2029	-1
ENSMUST00000074262	2439	1	ENSMUST00000020027	16455	-1	ENSMUST00000021530	16019	-1	ENSMUST00000022793	36708	-1	ENSMUST00000024829	11909	-1	ENSMUST00000026196	2867	-1	ENSMUST00000027826	81	-1	ENSMUST00000029459	40857	-1	ENSMUST00000030830	12073	-1	ENSMUST00000032398	170	-1	ENSMUST00000034115	2035	-1
ENSMUST00000111711	1937	1	ENSMUST00000020027	16468	-1	ENSMUST00000021530	16183	-1	ENSMUST00000022793	36782	-1	ENSMUST00000024829	12474	-1	ENSMUST00000026196	2874	-1	ENSMUST00000027826	818	-1	ENSMUST00000029459	41205	-1	ENSMUST00000030830	12999	-1	ENSMUST00000032398	17662	-1	ENSMUST00000034115	2089	-1
ENSMUST00000111694	2224	1	ENSMUST00000020027	16619	-1	ENSMUST00000021530	16218	-1	ENSMUST00000022793	36885	-1	ENSMUST00000024829	13945	-1	ENSMUST00000026196	388	-1	ENSMUST00000027826	907	-1	ENSMUST00000029459	41562	-1	ENSMUST00000030830	13711	-1	ENSMUST00000032398	18212	-1	ENSMUST00000034115	2111	-1
ENSMUST00000111694	2408	1	ENSMUST00000020027	1717	-1	ENSMUST00000021530	17107	-1	ENSMUST00000022793	37178	-1	ENSMUST00000024829	14751	-1	ENSMUST00000026196	4040	-1	ENSMUST00000027839	10880	-1	ENSMUST00000029459	42225	-1	ENSMUST00000030830	14185	-1	ENSMUST00000032398	18253	-1	ENSMUST00000034115	2124	-1
ENSMUST00000111694	2415	1	ENSMUST00000020027	1906	-1	ENSMUST00000021530	18395	-1	ENSMUST00000022793	37420	-1	ENSMUST00000024829	16553	-1	ENSMUST00000026196	463	-1	ENSMUST00000027839	11076	-1	ENSMUST00000029459	43482	-1	ENSMUST00000030830	14257	-1	ENSMUST00000032398	18280	-1	ENSMUST00000034115	2177	-1
ENSMUST00000111694	2460	1	ENSMUST00000020027	2257	-1	ENSMUST00000021530	18869	-1	ENSMUST00000022793	38495	-1	ENSMUST00000024829	16726	-1	ENSMUST00000026196	5079	-1	ENSMUST00000027839	11488	-1	ENSMUST00000029459	43891	-1	ENSMUST00000030830	14434	-1	ENSMUST00000032398	18304	-1	ENSMUST00000034115	2222	-1
ENSMUST00000111694	2590	1	ENSMUST00000020027	2537	-1	ENSMUST00000021530	20659	-1	ENSMUST00000022793	38579	-1	ENSMUST00000024829	18506	-1	ENSMUST00000026196	5654	-1	ENSMUST00000027839	12237	-1	ENSMUST00000029459	44258	-1	ENSMUST00000030830	14806	-1	ENSMUST00000032398	18308	-1	ENSMUST00000034115	2245	-1
ENSMUST00000111694	2728	1	ENSMUST00000020027	2933	-1	ENSMUST00000021530	20899	-1	ENSMUST00000022793	39292	-1	ENSMUST00000024829	18700	-1	ENSMUST00000026196	5806	-1	ENSMUST00000027839	12320	-1	ENSMUST00000029459	4949	-1	ENSMUST00000030830	16079	-1	ENSMUST00000032398	18369	-1	ENSMUST00000034115	2376	-1
ENSMUST00000111694	2238	1	ENSMUST00000020027	3125	-1	ENSMUST00000021530	22615	-1	ENSMUST00000022793	41596	-1	ENSMUST00000024829	18738	-1	ENSMUST00000026196	6016	-1	ENSMUST00000027839	12799	-1	ENSMUST00000029459	5563	-1	ENSMUST00000030830	16936	-1	ENSMUST00000032398	18426	-1	ENSMUST00000034115	2416	-1
ENSMUST00000102645	8546	1	ENSMUST00000020027	3943	-1	ENSMUST00000021530	22844	-1	ENSMUST00000022793	41648	-1	ENSMUST00000024829	19681	-1	ENSMUST00000026196	6794	-1	ENSMUST00000027839	12857	-1	ENSMUST00000029459	7024	-1	ENSMUST00000030830	17014	-1	ENSMUST00000032398	18704	-1	ENSMUST00000034115	2576	-1
ENSMUST00000035840	23034	1	ENSMUST00000020027	4243	-1	ENSMUST00000021530	23445	-1	ENSMUST00000022793	42671	-1	ENSMUST00000024829	19906	-1	ENSMUST00000026196	6847	-1	ENSMUST00000027839	16230	-1	ENSMUST00000029459	9427	-1	ENSMUST00000030830	17292	-1	ENSMUST00000032398	18908	-1	ENSMUST00000034115	261	-1
ENSMUST00000035840	23040	1	ENSMUST00000020027	4294	-1	ENSMUST00000021530	24417	-1	ENSMUST00000022793	42896	-1	ENSMUST00000024829	20022	-1	ENSMUST00000026196	6973	-1	ENSMUST00000027839	16697	-1	ENSMUST00000029459	9743	-1	ENSMUST00000030830	17410	-1	ENSMUST00000032398	18922	-1	ENSMUST00000034115	2669	-1
ENSMUST00000035840	23054	1	ENSMUST00000020027	4323	-1	ENSMUST00000021530	25244	-1	ENSMUST00000022793	43698	-1	ENSMUST00000024829	20951	-1	ENSMUST00000026196	7813	-1	ENSMUST00000027839	17586	-1	ENSMUST00000029459	9889	-1	ENSMUST00000030830	17478	-1	ENSMUST00000032398	19131	-1	ENSMUST00000034115	2692	-1
ENSMUST00000035840	23133	1	ENSMUST00000020027	4763	-1	ENSMUST00000021530	25438	-1	ENSMUST00000022793	43834	-1	ENSMUST00000024829	21119	-1	ENSMUST00000026196	8039	-1	ENSMUST00000027839	17721	-1	ENSMUST00000029476	10107	-1	ENSMUST00000030830	1775	-1	ENSMUST00000032398	20157	-1	ENSMUST00000034115	2725	-1
ENSMUST00000035840	23289	1	ENSMUST00000020027	4894	-1	ENSMUST00000021530	28411	-1	ENSMUST00000022793	44185	-1	ENSMUST00000024829	21735	-1	ENSMUST00000026196	8799	-1	ENSMUST00000027839	19077	-1	ENSMUST00000029476	10318	-1	ENSMUST00000030830	17769	-1	ENSMUST00000032398	20284	-1	ENSMUST00000034115	2777	-1
ENSMUST00000035840	23384	1	ENSMUST00000020027	5045	-1	ENSMUST00000021530	28792	-1	ENSMUST00000022793	44330	-1	ENSMUST00000024829	22287	-1	ENSMUST00000026196	8897	-1	ENSMUST00000027839	22157	-1	ENSMUST00000029476	11171	-1	ENSMUST00000030830	18195	-1	ENSMUST00000032398	21113	-1	ENSMUST00000034115	2846	-1
ENSMUST00000035840	23408	1	ENSMUST00000020027	5413	-1	ENSMUST00000021530	29047	-1	ENSMUST00000022793	5955	-1	ENSMUST00000024829	24264	-1	ENSMUST00000026196	9483	-1	ENSMUST00000027839	23267	-1	ENSMUST00000029476	1163	-1	ENSMUST00000030830	18289	-1	ENSMUST00000032398	21148	-1	ENSMUST00000034115	2873	-1
ENSMUST00000035840	23419	1	ENSMUST00000020027	5689	-1	ENSMUST00000021530	29185	-1	ENSMUST00000022793	7019	-1	ENSMUST00000024829	24461	-1	ENSMUST00000026196	9611	-1	ENSMUST00000027839	24046	-1	ENSMUST00000029476	11885	-1	ENSMUST00000030830	18355	-1	ENSMUST00000032398	21668	-1	ENSMUST00000034115	2895	-1
ENSMUST00000035840	23443	1	ENSMUST00000020027	5735	-1	ENSMUST00000021530	29307	-1	ENSMUST00000022793	7602	-1	ENSMUST00000024829	24860	-1	ENSMUST00000026196	963	-1	ENSMUST00000027839	24897	-1	ENSMUST00000029476	12466	-1	ENSMUST00000030830	1864	-1	ENSMUST00000032398	2607	-1	ENSMUST00000034115	2904	-1
ENSMUST00000035840	1065	1	ENSMUST00000020027	6466	-1	ENSMUST00000021530	29326	-1	ENSMUST00000022793	7684	-1	ENSMUST00000024829	24968	-1	ENSMUST00000026199	10581	-1	ENSMUST00000027839	24924	-1	ENSMUST00000029476	13273	-1	ENSMUST00000030830	19153	-1	ENSMUST00000032398	2895	-1	ENSMUST00000034115	3016	-1
ENSMUST00000035840	1212	1	ENSMUST00000020027	6612	-1	ENSMUST00000021530	29625	-1	ENSMUST00000022793	8452	-1	ENSMUST00000024829	25240	-1	ENSMUST00000026199	10904	-1	ENSMUST00000027839	25984	-1	ENSMUST00000029476	13600	-1	ENSMUST00000030830	19396	-1	ENSMUST00000032398	3010	-1	ENSMUST00000034115	3035	-1
ENSMUST00000165219	1349	1	ENSMUST00000020027	7018	-1	ENSMUST00000021530	29855	-1	ENSMUST00000022793	9387	-1	ENSMUST00000024829	25840	-1	ENSMUST00000026199	11224	-1	ENSMUST00000027839	26157	-1	ENSMUST00000029476	13643	-1	ENSMUST00000030830	19835	-1	ENSMUST00000032398	3318	-1	ENSMUST00000034115	3257	-1
ENSMUST00000165219	1376	1	ENSMUST00000020027	7510	-1	ENSMUST00000021530	31048	-1	ENSMUST00000022793	962	-1	ENSMUST00000024829	25877	-1	ENSMUST00000026199	11325	-1	ENSMUST00000027839	27427	-1	ENSMUST00000029476	13652	-1	ENSMUST00000030830	1996	-1	ENSMUST00000032398	3661	-1	ENSMUST00000034115	3343	-1
ENSMUST00000165219	1849	1	ENSMUST00000020027	7551	-1	ENSMUST00000021530	32650	-1	ENSMUST00000022819	1439	-1	ENSMUST00000024829	25961	-1	ENSMUST00000026199	11363	-1	ENSMUST00000027839	29524	-1	ENSMUST00000029476	14228	-1	ENSMUST00000030830	2040	-1	ENSMUST00000032398	3761	-1	ENSMUST00000034115	3624	-1
ENSMUST00000165219	1938	1	ENSMUST00000020027	7977	-1	ENSMUST00000021530	33392	-1	ENSMUST00000022819	2314	-1	ENSMUST00000024829	26050	-1	ENSMUST00000026199	11613	-1	ENSMUST00000027839	30059	-1	ENSMUST00000029476	1437	-1	ENSMUST00000030830	21150	-1	ENSMUST00000032398	3812	-1	ENSMUST00000034115	577	-1
ENSMUST00000165219	3797	1	ENSMUST00000020027	8261	-1	ENSMUST00000021530	33414	-1	ENSMUST00000022819	2548	-1	ENSMUST00000024829	2632	-1	ENSMUST00000026199	11665	-1	ENSMUST00000027839	31997	-1	ENSMUST00000029476	14553	-1	ENSMUST00000030830	2211	-1	ENSMUST00000032398	4368	-1	ENSMUST00000034115	699	-1
ENSMUST00000165219	1895	1	ENSMUST00000020027	8756	-1	ENSMUST00000021530	33436	-1	ENSMUST00000022819	267	-1	ENSMUST00000024829	28064	-1	ENSMUST00000026199	12159	-1	ENSMUST00000027839	32704	-1	ENSMUST00000029476	14882	-1	ENSMUST00000030830	2224	-1	ENSMUST00000032398	5362	-1	ENSMUST00000034115	71	-1
ENSMUST00000165219	1930	1	ENSMUST00000020027	8876	-1	ENSMUST00000021530	33455	-1	ENSMUST00000022819	2869	-1	ENSMUST00000024829	29798	-1	ENSMUST00000026199	12168	-1	ENSMUST00000027839	33489	-1	ENSMUST00000029476	15393	-1	ENSMUST00000030830	24170	-1	ENSMUST00000032398	5843	-1	ENSMUST00000034131	11237	-1
ENSMUST00000151799	183	1	ENSMUST00000020027	9064	-1	ENSMUST00000021530	33807	-1	ENSMUST00000022819	3606	-1	ENSMUST00000024829	30604	-1	ENSMUST00000026199	12434	-1	ENSMUST00000027839	33937	-1	ENSMUST00000029476	16510	-1	ENSMUST00000030830	2437	-1	ENSMUST00000032398	5877	-1	ENSMUST00000034131	1267	-1
ENSMUST00000151799	198	1	ENSMUST00000020027	9411	-1	ENSMUST00000021530	34388	-1	ENSMUST00000022819	3911	-1	ENSMUST00000024829	31509	-1	ENSMUST00000026199	12588	-1	ENSMUST00000027839	34179	-1	ENSMUST00000029476	16558	-1	ENSMUST00000030830	24903	-1	ENSMUST00000032398	6680	-1	ENSMUST00000034131	13750	-1
ENSMUST00000151799	8786	1	ENSMUST00000020034	11180	-1	ENSMUST00000021530	35044	-1	ENSMUST00000022819	413	-1	ENSMUST00000024829	31561	-1	ENSMUST00000026199	135	-1	ENSMUST00000027839	34234	-1	ENSMUST00000029476	17474	-1	ENSMUST00000030830	25201	-1	ENSMUST00000032398	6915	-1	ENSMUST00000034131	1407	-1
ENSMUST00000057019	779	1	ENSMUST00000020034	11308	-1	ENSMUST00000021530	35126	-1	ENSMUST00000022819	463	-1	ENSMUST00000024829	31577	-1	ENSMUST00000026199	13551	-1	ENSMUST00000027839	35645	-1	ENSMUST00000029476	17639	-1	ENSMUST00000030830	25296	-1	ENSMUST00000032398	7943	-1	ENSMUST00000034131	14533	-1
ENSMUST00000057019	3426	1	ENSMUST00000020034	12549	-1	ENSMUST00000021530	35608	-1	ENSMUST00000022819	4794	-1	ENSMUST00000024829	31659	-1	ENSMUST00000026199	13896	-1	ENSMUST00000027839	36820	-1	ENSMUST00000029476	18284	-1	ENSMUST00000030830	25901	-1	ENSMUST00000032398	8553	-1	ENSMUST00000034131	15404	-1
ENSMUST00000057019	3435	1	ENSMUST00000020034	1259	-1	ENSMUST00000021530	35646	-1	ENSMUST00000022819	5127	-1	ENSMUST00000024829	3227	-1	ENSMUST00000026199	13971	-1	ENSMUST00000027839	37242	-1	ENSMUST00000029476	18322	-1	ENSMUST00000030830	26799	-1	ENSMUST00000032398	8661	-1	ENSMUST00000034131	1547	-1
ENSMUST00000111601	1123	1	ENSMUST00000020034	12909	-1	ENSMUST00000021530	35725	-1	ENSMUST00000022819	5270	-1	ENSMUST00000024829	32774	-1	ENSMUST00000026199	1445	-1	ENSMUST00000027839	3742	-1	ENSMUST00000029476	18618	-1	ENSMUST00000030830	27637	-1	ENSMUST00000032398	9467	-1	ENSMUST00000034131	15518	-1
ENSMUST00000111601	1560	1	ENSMUST00000020034	13284	-1	ENSMUST00000021530	365	-1	ENSMUST00000022819	5502	-1	ENSMUST00000024829	33003	-1	ENSMUST00000026199	14497	-1	ENSMUST00000027839	39672	-1	ENSMUST00000029476	18649	-1	ENSMUST00000030830	27752	-1	ENSMUST00000032398	9795	-1	ENSMUST00000034131	15769	-1
ENSMUST00000111601	1888	1	ENSMUST00000020034	13289	-1	ENSMUST00000021530	36779	-1	ENSMUST00000022819	5584	-1	ENSMUST00000024829	37635	-1	ENSMUST00000026199	14634	-1	ENSMUST00000027839	40550	-1	ENSMUST00000029476	18808	-1	ENSMUST00000030830	27842	-1	ENSMUST00000032399	10215	-1	ENSMUST00000034131	15802	-1
ENSMUST00000111601	2077	1	ENSMUST00000020034	1343	-1	ENSMUST00000021530	3994	-1	ENSMUST00000022819	5916	-1	ENSMUST00000024829	39191	-1	ENSMUST00000026199	15043	-1	ENSMUST00000027839	40736	-1	ENSMUST00000029476	18818	-1	ENSMUST00000030830	28053	-1	ENSMUST00000032399	10220	-1	ENSMUST00000034131	15890	-1
ENSMUST00000111601	2240	1	ENSMUST00000020034	13982	-1	ENSMUST00000021530	4105	-1	ENSMUST00000022819	6036	-1	ENSMUST00000024829	40429	-1	ENSMUST00000026199	15066	-1	ENSMUST00000027839	4169	-1	ENSMUST00000029476	18826	-1	ENSMUST00000030830	28747	-1	ENSMUST00000032399	11216	-1	ENSMUST00000034131	16275	-1
ENSMUST00000111601	2459	1	ENSMUST00000020034	14718	-1	ENSMUST00000021530	4279	-1	ENSMUST00000022819	6079	-1	ENSMUST00000024829	41376	-1	ENSMUST00000026199	15299	-1	ENSMUST00000027839	42302	-1	ENSMUST00000029476	19609	-1	ENSMUST00000030830	28757	-1	ENSMUST00000032399	11544	-1	ENSMUST00000034131	16991	-1
ENSMUST00000111601	3083	1	ENSMUST00000020034	14901	-1	ENSMUST00000021530	5340	-1	ENSMUST00000022819	6157	-1	ENSMUST00000024829	42702	-1	ENSMUST00000026199	15350	-1	ENSMUST00000027839	4278	-1	ENSMUST00000029476	19714	-1	ENSMUST00000030830	3832	-1	ENSMUST00000032399	12165	-1	ENSMUST00000034131	18196	-1
ENSMUST00000111601	8156	1	ENSMUST00000020034	14922	-1	ENSMUST00000021530	5645	-1	ENSMUST00000022819	6207	-1	ENSMUST00000024829	433	-1	ENSMUST00000026199	15534	-1	ENSMUST00000027839	43699	-1	ENSMUST00000029476	20089	-1	ENSMUST00000030830	3983	-1	ENSMUST00000032399	12195	-1	ENSMUST00000034131	18284	-1
ENSMUST00000111601	8199	1	ENSMUST00000020034	15117	-1	ENSMUST00000021530	6397	-1	ENSMUST00000022819	630	-1	ENSMUST00000024829	4390	-1	ENSMUST00000026199	1674	-1	ENSMUST00000027839	44905	-1	ENSMUST00000029476	20143	-1	ENSMUST00000030830	4680	-1	ENSMUST00000032399	12436	-1	ENSMUST00000034131	18329	-1
ENSMUST00000111601	8421	1	ENSMUST00000020034	15735	-1	ENSMUST00000021530	6822	-1	ENSMUST00000022819	6408	-1	ENSMUST00000024829	44847	-1	ENSMUST00000026199	1760	-1	ENSMUST00000027839	45274	-1	ENSMUST00000029476	2034	-1	ENSMUST00000030830	5451	-1	ENSMUST00000032399	13378	-1	ENSMUST00000034131	18762	-1
ENSMUST00000111601	8433	1	ENSMUST00000020034	16582	-1	ENSMUST00000021530	6827	-1	ENSMUST00000022819	6493	-1	ENSMUST00000024829	46691	-1	ENSMUST00000026199	1803	-1	ENSMUST00000027839	46248	-1	ENSMUST00000029476	20375	-1	ENSMUST00000030830	5759	-1	ENSMUST00000032399	14370	-1	ENSMUST00000034131	19185	-1
ENSMUST00000062360	7451	1	ENSMUST00000020034	16888	-1	ENSMUST00000021530	7246	-1	ENSMUST00000022819	6506	-1	ENSMUST00000024829	48204	-1	ENSMUST00000026199	2197	-1	ENSMUST00000027839	46505	-1	ENSMUST00000029476	20524	-1	ENSMUST00000030830	5950	-1	ENSMUST00000032399	14649	-1	ENSMUST00000034131	20018	-1
ENSMUST00000036860	4646	1	ENSMUST00000020034	16920	-1	ENSMUST00000021530	7589	-1	ENSMUST00000022819	6553	-1	ENSMUST00000024829	48472	-1	ENSMUST00000026199	2270	-1	ENSMUST00000027839	46592	-1	ENSMUST00000029476	20537	-1	ENSMUST00000030830	6018	-1	ENSMUST00000032399	14672	-1	ENSMUST00000034131	20134	-1
ENSMUST00000090682	1254	1	ENSMUST00000020034	1746	-1	ENSMUST00000021530	8634	-1	ENSMUST00000022819	6614	-1	ENSMUST00000024829	4856	-1	ENSMUST00000026199	2897	-1	ENSMUST00000027839	48438	-1	ENSMUST00000029476	20597	-1	ENSMUST00000030830	6822	-1	ENSMUST00000032399	15144	-1	ENSMUST00000034131	2068	-1
ENSMUST00000090682	4653	1	ENSMUST00000020034	17671	-1	ENSMUST00000021530	8859	-1	ENSMUST00000022819	6632	-1	ENSMUST00000024829	49243	-1	ENSMUST00000026199	3175	-1	ENSMUST00000027839	48628	-1	ENSMUST00000029476	20906	-1	ENSMUST00000030830	717	-1	ENSMUST00000032399	1539	-1	ENSMUST00000034131	20873	-1
ENSMUST00000090682	4750	1	ENSMUST00000020034	18351	-1	ENSMUST00000021530	9048	-1	ENSMUST00000022819	6732	-1	ENSMUST00000024829	4936	-1	ENSMUST00000026199	3268	-1	ENSMUST00000027839	487	-1	ENSMUST00000029476	21438	-1	ENSMUST00000030830	8026	-1	ENSMUST00000032399	1597	-1	ENSMUST00000034131	21721	-1
ENSMUST00000090682	4772	1	ENSMUST00000020034	19133	-1	ENSMUST00000021530	923	-1	ENSMUST00000022819	701	-1	ENSMUST00000024829	49501	-1	ENSMUST00000026199	3572	-1	ENSMUST00000027839	49570	-1	ENSMUST00000029476	21678	-1	ENSMUST00000030830	8328	-1	ENSMUST00000032399	16483	-1	ENSMUST00000034131	21869	-1
ENSMUST00000090682	4797	1	ENSMUST00000020034	19405	-1	ENSMUST00000021530	9392	-1	ENSMUST00000022819	7047	-1	ENSMUST00000024829	50879	-1	ENSMUST00000026199	3786	-1	ENSMUST00000027839	50829	-1	ENSMUST00000029476	21875	-1	ENSMUST00000030830	8554	-1	ENSMUST00000032399	17036	-1	ENSMUST00000034131	22306	-1
ENSMUST00000090682	5322	1	ENSMUST00000020034	19897	-1	ENSMUST00000021544	10093	-1	ENSMUST00000022819	7125	-1	ENSMUST00000024829	51478	-1	ENSMUST00000026199	3860	-1	ENSMUST00000027839	50981	-1	ENSMUST00000029476	2520	-1	ENSMUST00000030830	91	-1	ENSMUST00000032399	17138	-1	ENSMUST00000034131	24012	-1
ENSMUST00000090682	5541	1	ENSMUST00000020034	22198	-1	ENSMUST00000021544	10261	-1	ENSMUST00000022819	7151	-1	ENSMUST00000024829	51645	-1	ENSMUST00000026199	4509	-1	ENSMUST00000027839	51373	-1	ENSMUST00000029476	3502	-1	ENSMUST00000030830	9468	-1	ENSMUST00000032399	1718	-1	ENSMUST00000034131	24032	-1
ENSMUST00000090682	5548	1	ENSMUST00000020034	2297	-1	ENSMUST00000021544	10335	-1	ENSMUST00000022819	7172	-1	ENSMUST00000024829	51951	-1	ENSMUST00000026199	4927	-1	ENSMUST00000027839	51385	-1	ENSMUST00000029476	3660	-1	ENSMUST00000030830	9789	-1	ENSMUST00000032399	1752	-1	ENSMUST00000034131	24976	-1
ENSMUST00000090682	1279	1	ENSMUST00000020034	23355	-1	ENSMUST00000021544	1073	-1	ENSMUST00000022819	7224	-1	ENSMUST00000024829	52827	-1	ENSMUST00000026199	5163	-1	ENSMUST00000027839	52284	-1	ENSMUST00000029476	3677	-1	ENSMUST00000030839	10213	-1	ENSMUST00000032399	17590	-1	ENSMUST00000034131	25541	-1
ENSMUST00000111461	421	1	ENSMUST00000020034	24165	-1	ENSMUST00000021544	10800	-1	ENSMUST00000022819	7301	-1	ENSMUST00000024829	52928	-1	ENSMUST00000026199	5213	-1	ENSMUST00000027839	54598	-1	ENSMUST00000029476	3797	-1	ENSMUST00000030839	10574	-1	ENSMUST00000032399	18832	-1	ENSMUST00000034131	25767	-1
ENSMUST00000111461	404	1	ENSMUST00000020034	24570	-1	ENSMUST00000021544	11269	-1	ENSMUST00000022819	7371	-1	ENSMUST00000024829	54931	-1	ENSMUST00000026199	5218	-1	ENSMUST00000027839	56352	-1	ENSMUST00000029476	4107	-1	ENSMUST00000030839	107	-1	ENSMUST00000032399	19233	-1	ENSMUST00000034131	25781	-1
ENSMUST00000111461	411	1	ENSMUST00000020034	25548	-1	ENSMUST00000021544	11637	-1	ENSMUST00000022819	7419	-1	ENSMUST00000024829	5526	-1	ENSMUST00000026199	5460	-1	ENSMUST00000027839	57682	-1	ENSMUST00000029476	469	-1	ENSMUST00000030839	10915	-1	ENSMUST00000032399	19780	-1	ENSMUST00000034131	27805	-1
ENSMUST00000077941	93	1	ENSMUST00000020034	25577	-1	ENSMUST00000021544	11967	-1	ENSMUST00000022819	7778	-1	ENSMUST00000024829	56631	-1	ENSMUST00000026199	5537	-1	ENSMUST00000027839	58761	-1	ENSMUST00000029476	480	-1	ENSMUST00000030839	11565	-1	ENSMUST00000032399	19915	-1	ENSMUST00000034131	27934	-1
ENSMUST00000002172	7917	1	ENSMUST00000020034	27033	-1	ENSMUST00000021544	12083	-1	ENSMUST00000022819	7848	-1	ENSMUST00000024829	5852	-1	ENSMUST00000026199	5699	-1	ENSMUST00000027839	58790	-1	ENSMUST00000029476	4838	-1	ENSMUST00000030839	1172	-1	ENSMUST00000032399	20603	-1	ENSMUST00000034131	28374	-1
ENSMUST00000002172	8282	1	ENSMUST00000020034	27305	-1	ENSMUST00000021544	12480	-1	ENSMUST00000022819	8402	-1	ENSMUST00000024829	6815	-1	ENSMUST00000026199	5777	-1	ENSMUST00000027839	5892	-1	ENSMUST00000029476	5122	-1	ENSMUST00000030839	11848	-1	ENSMUST00000032399	21083	-1	ENSMUST00000034131	29592	-1
ENSMUST00000002172	8321	1	ENSMUST00000020034	27600	-1	ENSMUST00000021544	13099	-1	ENSMUST00000022819	8510	-1	ENSMUST00000024829	9376	-1	ENSMUST00000026199	594	-1	ENSMUST00000027839	6523	-1	ENSMUST00000029476	549	-1	ENSMUST00000030839	12522	-1	ENSMUST00000032399	21139	-1	ENSMUST00000034131	30841	-1
ENSMUST00000002172	8376	1	ENSMUST00000020034	27861	-1	ENSMUST00000021544	13436	-1	ENSMUST00000022819	8679	-1	ENSMUST00000024839	10079	-1	ENSMUST00000026199	6023	-1	ENSMUST00000027839	8422	-1	ENSMUST00000029476	6042	-1	ENSMUST00000030839	13901	-1	ENSMUST00000032399	22008	-1	ENSMUST00000034131	31559	-1
ENSMUST00000002172	8429	1	ENSMUST00000020034	27927	-1	ENSMUST00000021544	13494	-1	ENSMUST00000022819	9078	-1	ENSMUST00000024839	1023	-1	ENSMUST00000026199	7325	-1	ENSMUST00000027839	9469	-1	ENSMUST00000029476	6134	-1	ENSMUST00000030839	14613	-1	ENSMUST00000032399	2298	-1	ENSMUST00000034131	32225	-1
ENSMUST00000002172	8466	1	ENSMUST00000020034	28691	-1	ENSMUST00000021544	14105	-1	ENSMUST00000022819	908	-1	ENSMUST00000024839	10243	-1	ENSMUST00000026199	8101	-1	ENSMUST00000027839	9718	-1	ENSMUST00000029476	6436	-1	ENSMUST00000030839	14715	-1	ENSMUST00000032399	2371	-1	ENSMUST00000034131	32671	-1
ENSMUST00000002172	8486	1	ENSMUST00000020034	28824	-1	ENSMUST00000021544	14185	-1	ENSMUST00000022819	9162	-1	ENSMUST00000024839	10250	-1	ENSMUST00000026199	8143	-1	ENSMUST00000027839	9856	-1	ENSMUST00000029476	7017	-1	ENSMUST00000030839	15023	-1	ENSMUST00000032399	25681	-1	ENSMUST00000034131	32903	-1
ENSMUST00000002172	8497	1	ENSMUST00000020034	29687	-1	ENSMUST00000021544	14729	-1	ENSMUST00000022819	9325	-1	ENSMUST00000024839	10460	-1	ENSMUST00000026199	8334	-1	ENSMUST00000027846	10031	-1	ENSMUST00000029476	7094	-1	ENSMUST00000030839	15288	-1	ENSMUST00000032399	25742	-1	ENSMUST00000034131	32967	-1
ENSMUST00000002172	9178	1	ENSMUST00000020034	30736	-1	ENSMUST00000021544	14826	-1	ENSMUST00000022819	9524	-1	ENSMUST00000024839	10629	-1	ENSMUST00000026199	8597	-1	ENSMUST00000027846	1018	-1	ENSMUST00000029476	7222	-1	ENSMUST00000030839	15778	-1	ENSMUST00000032399	26437	-1	ENSMUST00000034131	33840	-1
ENSMUST00000002172	8080	1	ENSMUST00000020034	32064	-1	ENSMUST00000021544	15083	-1	ENSMUST00000022819	953	-1	ENSMUST00000024839	10678	-1	ENSMUST00000026199	8608	-1	ENSMUST00000027846	10200	-1	ENSMUST00000029476	754	-1	ENSMUST00000030839	16714	-1	ENSMUST00000032399	26932	-1	ENSMUST00000034131	34080	-1
ENSMUST00000002172	9186	1	ENSMUST00000020034	32102	-1	ENSMUST00000021544	15806	-1	ENSMUST00000022831	10237	-1	ENSMUST00000024839	11203	-1	ENSMUST00000026199	8876	-1	ENSMUST00000027846	1032	-1	ENSMUST00000029476	7909	-1	ENSMUST00000030839	18717	-1	ENSMUST00000032399	27175	-1	ENSMUST00000034131	35083	-1
ENSMUST00000028689	54419	1	ENSMUST00000020034	32548	-1	ENSMUST00000021544	15944	-1	ENSMUST00000022831	10348	-1	ENSMUST00000024839	11350	-1	ENSMUST00000026199	9104	-1	ENSMUST00000027846	10347	-1	ENSMUST00000029476	8081	-1	ENSMUST00000030839	19688	-1	ENSMUST00000032399	27417	-1	ENSMUST00000034131	3550	-1
ENSMUST00000028689	54430	1	ENSMUST00000020034	32735	-1	ENSMUST00000021544	16177	-1	ENSMUST00000022831	10729	-1	ENSMUST00000024839	1353	-1	ENSMUST00000026199	9274	-1	ENSMUST00000027846	10687	-1	ENSMUST00000029476	8119	-1	ENSMUST00000030839	20464	-1	ENSMUST00000032399	29046	-1	ENSMUST00000034131	35700	-1
ENSMUST00000111338	93368	1	ENSMUST00000020034	33011	-1	ENSMUST00000021544	16280	-1	ENSMUST00000022831	10778	-1	ENSMUST00000024839	1488	-1	ENSMUST00000026199	9364	-1	ENSMUST00000027846	10761	-1	ENSMUST00000029476	8523	-1	ENSMUST00000030839	23282	-1	ENSMUST00000032399	29113	-1	ENSMUST00000034131	3602	-1
ENSMUST00000111338	93570	1	ENSMUST00000020034	4054	-1	ENSMUST00000021544	16621	-1	ENSMUST00000022831	10797	-1	ENSMUST00000024839	1719	-1	ENSMUST00000026208	10619	-1	ENSMUST00000027846	11826	-1	ENSMUST00000029476	8592	-1	ENSMUST00000030839	23738	-1	ENSMUST00000032399	29193	-1	ENSMUST00000034131	36244	-1
ENSMUST00000111338	93627	1	ENSMUST00000020034	4973	-1	ENSMUST00000021544	16639	-1	ENSMUST00000022831	10818	-1	ENSMUST00000024839	1931	-1	ENSMUST00000026208	1115	-1	ENSMUST00000027846	12641	-1	ENSMUST00000029476	8873	-1	ENSMUST00000030839	24181	-1	ENSMUST00000032399	29327	-1	ENSMUST00000034131	36755	-1
ENSMUST00000111338	93655	1	ENSMUST00000020034	4982	-1	ENSMUST00000021544	1705	-1	ENSMUST00000022831	11153	-1	ENSMUST00000024839	1938	-1	ENSMUST00000026208	11460	-1	ENSMUST00000027846	12712	-1	ENSMUST00000029476	9441	-1	ENSMUST00000030839	25005	-1	ENSMUST00000032399	29481	-1	ENSMUST00000034131	3687	-1
ENSMUST00000111338	93420	1	ENSMUST00000020034	5189	-1	ENSMUST00000021544	1723	-1	ENSMUST00000022831	11333	-1	ENSMUST00000024839	2175	-1	ENSMUST00000026208	12109	-1	ENSMUST00000027846	12861	-1	ENSMUST00000029476	9968	-1	ENSMUST00000030839	25674	-1	ENSMUST00000032399	29941	-1	ENSMUST00000034131	37058	-1
ENSMUST00000111333	1480	1	ENSMUST00000020034	5590	-1	ENSMUST00000021544	17413	-1	ENSMUST00000022831	11352	-1	ENSMUST00000024839	2321	-1	ENSMUST00000026208	1229	-1	ENSMUST00000027846	12870	-1	ENSMUST00000029477	10749	-1	ENSMUST00000030839	26210	-1	ENSMUST00000032399	30337	-1	ENSMUST00000034131	37821	-1
ENSMUST00000111333	1834	1	ENSMUST00000020034	6022	-1	ENSMUST00000021544	17940	-1	ENSMUST00000022831	11385	-1	ENSMUST00000024839	2362	-1	ENSMUST00000026208	12643	-1	ENSMUST00000027846	13259	-1	ENSMUST00000029477	10986	-1	ENSMUST00000030839	26831	-1	ENSMUST00000032399	30385	-1	ENSMUST00000034131	38280	-1
ENSMUST00000028678	1413	1	ENSMUST00000020034	6107	-1	ENSMUST00000021544	17992	-1	ENSMUST00000022831	1157	-1	ENSMUST00000024839	2400	-1	ENSMUST00000026208	13165	-1	ENSMUST00000027846	13444	-1	ENSMUST00000029477	1116	-1	ENSMUST00000030839	26996	-1	ENSMUST00000032399	31476	-1	ENSMUST00000034131	38961	-1
ENSMUST00000028678	1578	1	ENSMUST00000020034	6887	-1	ENSMUST00000021544	18135	-1	ENSMUST00000022831	11755	-1	ENSMUST00000024839	2410	-1	ENSMUST00000026208	14570	-1	ENSMUST00000027846	1345	-1	ENSMUST00000029477	11335	-1	ENSMUST00000030839	28849	-1	ENSMUST00000032399	31588	-1	ENSMUST00000034131	3940	-1
ENSMUST00000028678	1619	1	ENSMUST00000020034	7253	-1	ENSMUST00000021544	1873	-1	ENSMUST00000022831	11782	-1	ENSMUST00000024839	2539	-1	ENSMUST00000026208	14742	-1	ENSMUST00000027846	13870	-1	ENSMUST00000029477	11933	-1	ENSMUST00000030839	30962	-1	ENSMUST00000032399	3170	-1	ENSMUST00000034131	4203	-1
ENSMUST00000028678	1641	1	ENSMUST00000020034	733	-1	ENSMUST00000021544	2062	-1	ENSMUST00000022831	1553	-1	ENSMUST00000024839	2839	-1	ENSMUST00000026208	15250	-1	ENSMUST00000027846	13908	-1	ENSMUST00000029477	12468	-1	ENSMUST00000030839	3144	-1	ENSMUST00000032399	32371	-1	ENSMUST00000034131	4210	-1
ENSMUST00000028678	1662	1	ENSMUST00000020034	8014	-1	ENSMUST00000021544	2311	-1	ENSMUST00000022831	1583	-1	ENSMUST00000024839	3160	-1	ENSMUST00000026208	163	-1	ENSMUST00000027846	14002	-1	ENSMUST00000029477	12845	-1	ENSMUST00000030839	31753	-1	ENSMUST00000032399	32529	-1	ENSMUST00000034131	5015	-1
ENSMUST00000028678	1384	1	ENSMUST00000020034	8096	-1	ENSMUST00000021544	2323	-1	ENSMUST00000022831	1624	-1	ENSMUST00000024839	3202	-1	ENSMUST00000026208	16454	-1	ENSMUST00000027846	14075	-1	ENSMUST00000029477	13176	-1	ENSMUST00000030839	32569	-1	ENSMUST00000032399	33421	-1	ENSMUST00000034131	5146	-1
ENSMUST00000045705	42678	1	ENSMUST00000020034	8259	-1	ENSMUST00000021544	2540	-1	ENSMUST00000022831	1789	-1	ENSMUST00000024839	3226	-1	ENSMUST00000026208	16777	-1	ENSMUST00000027846	14224	-1	ENSMUST00000029477	13580	-1	ENSMUST00000030839	33082	-1	ENSMUST00000032399	5235	-1	ENSMUST00000034131	5759	-1
ENSMUST00000045705	42694	1	ENSMUST00000020034	8413	-1	ENSMUST00000021544	4025	-1	ENSMUST00000022831	1810	-1	ENSMUST00000024839	3264	-1	ENSMUST00000026208	16870	-1	ENSMUST00000027846	144	-1	ENSMUST00000029477	14709	-1	ENSMUST00000030839	33811	-1	ENSMUST00000032399	5279	-1	ENSMUST00000034131	6456	-1
ENSMUST00000045705	43384	1	ENSMUST00000020034	8826	-1	ENSMUST00000021544	4641	-1	ENSMUST00000022831	2110	-1	ENSMUST00000024839	3405	-1	ENSMUST00000026208	19313	-1	ENSMUST00000027846	14436	-1	ENSMUST00000029477	14733	-1	ENSMUST00000030839	35124	-1	ENSMUST00000032399	5526	-1	ENSMUST00000034131	6959	-1
ENSMUST00000045705	43456	1	ENSMUST00000020102	1038	-1	ENSMUST00000021544	4704	-1	ENSMUST00000022831	2237	-1	ENSMUST00000024839	3647	-1	ENSMUST00000026208	19784	-1	ENSMUST00000027846	1481	-1	ENSMUST00000029477	16448	-1	ENSMUST00000030839	37136	-1	ENSMUST00000032399	6218	-1	ENSMUST00000034131	8002	-1
ENSMUST00000045705	187494	1	ENSMUST00000020102	10506	-1	ENSMUST00000021544	4864	-1	ENSMUST00000022831	2823	-1	ENSMUST00000024839	388	-1	ENSMUST00000026208	20900	-1	ENSMUST00000027846	1526	-1	ENSMUST00000029477	16455	-1	ENSMUST00000030839	37329	-1	ENSMUST00000032399	6242	-1	ENSMUST00000034131	8492	-1
ENSMUST00000045705	187662	1	ENSMUST00000020102	10737	-1	ENSMUST00000021544	4945	-1	ENSMUST00000022831	2828	-1	ENSMUST00000024839	4375	-1	ENSMUST00000026208	21456	-1	ENSMUST00000027846	1531	-1	ENSMUST00000029477	17207	-1	ENSMUST00000030839	37665	-1	ENSMUST00000032399	8438	-1	ENSMUST00000034131	8505	-1
ENSMUST00000045705	187669	1	ENSMUST00000020102	10979	-1	ENSMUST00000021544	5231	-1	ENSMUST00000022831	2929	-1	ENSMUST00000024839	4605	-1	ENSMUST00000026208	21694	-1	ENSMUST00000027846	1998	-1	ENSMUST00000029477	19085	-1	ENSMUST00000030839	37795	-1	ENSMUST00000032399	8569	-1	ENSMUST00000034132	1127	-1
ENSMUST00000045705	187956	1	ENSMUST00000020102	11196	-1	ENSMUST00000021544	5248	-1	ENSMUST00000022831	3331	-1	ENSMUST00000024839	4870	-1	ENSMUST00000026208	22201	-1	ENSMUST00000027846	2022	-1	ENSMUST00000029477	19119	-1	ENSMUST00000030839	38890	-1	ENSMUST00000032399	8596	-1	ENSMUST00000034132	1134	-1
ENSMUST00000045705	187971	1	ENSMUST00000020102	13362	-1	ENSMUST00000021544	5487	-1	ENSMUST00000022831	3412	-1	ENSMUST00000024839	5018	-1	ENSMUST00000026208	22364	-1	ENSMUST00000027846	21	-1	ENSMUST00000029477	20294	-1	ENSMUST00000030839	39635	-1	ENSMUST00000032399	8730	-1	ENSMUST00000034132	1156	-1
ENSMUST00000045705	187984	1	ENSMUST00000020102	13904	-1	ENSMUST00000021544	6188	-1	ENSMUST00000022831	3865	-1	ENSMUST00000024839	5642	-1	ENSMUST00000026208	2372	-1	ENSMUST00000027846	2934	-1	ENSMUST00000029477	2045	-1	ENSMUST00000030839	40579	-1	ENSMUST00000032399	9352	-1	ENSMUST00000034132	1322	-1
ENSMUST00000045705	188145	1	ENSMUST00000020102	14087	-1	ENSMUST00000021544	7246	-1	ENSMUST00000022831	3929	-1	ENSMUST00000024839	5811	-1	ENSMUST00000026208	23916	-1	ENSMUST00000027846	3281	-1	ENSMUST00000029477	22934	-1	ENSMUST00000030839	40816	-1	ENSMUST00000032399	9868	-1	ENSMUST00000034132	1456	-1
ENSMUST00000045705	187650	1	ENSMUST00000020102	14793	-1	ENSMUST00000021544	7667	-1	ENSMUST00000022831	3947	-1	ENSMUST00000024839	6096	-1	ENSMUST00000026208	25118	-1	ENSMUST00000027846	3752	-1	ENSMUST00000029477	23081	-1	ENSMUST00000030839	41372	-1	ENSMUST00000032399	9938	-1	ENSMUST00000034132	1626	-1
ENSMUST00000170432	6711	1	ENSMUST00000020102	15080	-1	ENSMUST00000021544	8701	-1	ENSMUST00000022831	4248	-1	ENSMUST00000024839	6235	-1	ENSMUST00000026208	25285	-1	ENSMUST00000027846	3892	-1	ENSMUST00000029477	25015	-1	ENSMUST00000030839	41945	-1	ENSMUST00000032410	10117	-1	ENSMUST00000034132	1647	-1
ENSMUST00000170432	6838	1	ENSMUST00000020102	15496	-1	ENSMUST00000021544	8764	-1	ENSMUST00000022831	4591	-1	ENSMUST00000024839	6355	-1	ENSMUST00000026208	2574	-1	ENSMUST00000027846	396	-1	ENSMUST00000029477	2568	-1	ENSMUST00000030839	42678	-1	ENSMUST00000032410	10452	-1	ENSMUST00000034132	173	-1
ENSMUST00000170432	7078	1	ENSMUST00000020102	16609	-1	ENSMUST00000021544	8827	-1	ENSMUST00000022831	460	-1	ENSMUST00000024839	6882	-1	ENSMUST00000026208	26020	-1	ENSMUST00000027846	4158	-1	ENSMUST00000029477	25931	-1	ENSMUST00000030839	4310	-1	ENSMUST00000032410	10681	-1	ENSMUST00000034132	2264	-1
ENSMUST00000111303	266	1	ENSMUST00000020102	17461	-1	ENSMUST00000021544	9195	-1	ENSMUST00000022831	4645	-1	ENSMUST00000024839	7070	-1	ENSMUST00000026208	27582	-1	ENSMUST00000027846	455	-1	ENSMUST00000029477	25981	-1	ENSMUST00000030839	44935	-1	ENSMUST00000032410	10852	-1	ENSMUST00000034132	2291	-1
ENSMUST00000111303	415	1	ENSMUST00000020102	17477	-1	ENSMUST00000021544	9471	-1	ENSMUST00000022831	5332	-1	ENSMUST00000024839	7298	-1	ENSMUST00000026208	28213	-1	ENSMUST00000027846	4597	-1	ENSMUST00000029477	26203	-1	ENSMUST00000030839	45641	-1	ENSMUST00000032410	11152	-1	ENSMUST00000034132	2523	-1
ENSMUST00000111303	543	1	ENSMUST00000020102	17510	-1	ENSMUST00000021544	9761	-1	ENSMUST00000022831	5928	-1	ENSMUST00000024839	7375	-1	ENSMUST00000026208	28326	-1	ENSMUST00000027846	4812	-1	ENSMUST00000029477	26443	-1	ENSMUST00000030839	45730	-1	ENSMUST00000032410	11288	-1	ENSMUST00000034132	2899	-1
ENSMUST00000150482	15697	1	ENSMUST00000020102	17770	-1	ENSMUST00000021544	9844	-1	ENSMUST00000022831	5949	-1	ENSMUST00000024839	7417	-1	ENSMUST00000026208	28443	-1	ENSMUST00000027846	4978	-1	ENSMUST00000029477	26830	-1	ENSMUST00000030839	4638	-1	ENSMUST00000032410	11793	-1	ENSMUST00000034132	3081	-1
ENSMUST00000150482	15923	1	ENSMUST00000020102	18746	-1	ENSMUST00000021544	9918	-1	ENSMUST00000022831	5961	-1	ENSMUST00000024839	7661	-1	ENSMUST00000026208	31140	-1	ENSMUST00000027846	5212	-1	ENSMUST00000029477	27076	-1	ENSMUST00000030839	46807	-1	ENSMUST00000032410	11831	-1	ENSMUST00000034132	3268	-1
ENSMUST00000150482	16059	1	ENSMUST00000020102	19511	-1	ENSMUST00000021544	9960	-1	ENSMUST00000022831	6047	-1	ENSMUST00000024839	8113	-1	ENSMUST00000026208	32168	-1	ENSMUST00000027846	5495	-1	ENSMUST00000029477	27173	-1	ENSMUST00000030839	47813	-1	ENSMUST00000032410	1192	-1	ENSMUST00000034132	3304	-1
ENSMUST00000150482	18813	1	ENSMUST00000020102	1957	-1	ENSMUST00000021567	101603	-1	ENSMUST00000022831	6161	-1	ENSMUST00000024839	8291	-1	ENSMUST00000026208	33860	-1	ENSMUST00000027846	5629	-1	ENSMUST00000029477	29438	-1	ENSMUST00000030839	4942	-1	ENSMUST00000032410	1339	-1	ENSMUST00000034132	3446	-1
ENSMUST00000090586	138783	1	ENSMUST00000020102	19726	-1	ENSMUST00000021567	102391	-1	ENSMUST00000022831	6368	-1	ENSMUST00000024839	8321	-1	ENSMUST00000026208	34736	-1	ENSMUST00000027846	5703	-1	ENSMUST00000029477	30603	-1	ENSMUST00000030839	4999	-1	ENSMUST00000032410	1517	-1	ENSMUST00000034132	3529	-1
ENSMUST00000090586	138834	1	ENSMUST00000020102	21346	-1	ENSMUST00000021567	103601	-1	ENSMUST00000022831	6587	-1	ENSMUST00000024839	8489	-1	ENSMUST00000026208	35046	-1	ENSMUST00000027846	6181	-1	ENSMUST00000029477	30632	-1	ENSMUST00000030839	5644	-1	ENSMUST00000032410	176	-1	ENSMUST00000034132	438	-1
ENSMUST00000090586	138862	1	ENSMUST00000020102	21527	-1	ENSMUST00000021567	104937	-1	ENSMUST00000022831	6912	-1	ENSMUST00000024839	8642	-1	ENSMUST00000026208	35622	-1	ENSMUST00000027846	6673	-1	ENSMUST00000029477	3076	-1	ENSMUST00000030839	5927	-1	ENSMUST00000032410	1875	-1	ENSMUST00000034132	44	-1
ENSMUST00000090586	139055	1	ENSMUST00000020102	21581	-1	ENSMUST00000021567	105698	-1	ENSMUST00000022831	7093	-1	ENSMUST00000024839	8898	-1	ENSMUST00000026208	35669	-1	ENSMUST00000027846	6695	-1	ENSMUST00000029477	30977	-1	ENSMUST00000030839	862	-1	ENSMUST00000032410	1968	-1	ENSMUST00000034132	4569	-1
ENSMUST00000090586	139112	1	ENSMUST00000020102	2167	-1	ENSMUST00000021567	105912	-1	ENSMUST00000022831	7157	-1	ENSMUST00000024839	8917	-1	ENSMUST00000026208	36043	-1	ENSMUST00000027846	6920	-1	ENSMUST00000029477	31115	-1	ENSMUST00000030839	8718	-1	ENSMUST00000032410	1991	-1	ENSMUST00000034132	4598	-1
ENSMUST00000090559	1229	1	ENSMUST00000020102	21746	-1	ENSMUST00000021567	105987	-1	ENSMUST00000022831	7624	-1	ENSMUST00000024839	8941	-1	ENSMUST00000026208	36966	-1	ENSMUST00000027846	7126	-1	ENSMUST00000029477	31540	-1	ENSMUST00000030839	9749	-1	ENSMUST00000032410	2308	-1	ENSMUST00000034132	478	-1
ENSMUST00000067631	1692	1	ENSMUST00000020102	22528	-1	ENSMUST00000021567	107241	-1	ENSMUST00000022831	7757	-1	ENSMUST00000024839	9251	-1	ENSMUST00000026208	37748	-1	ENSMUST00000027846	7785	-1	ENSMUST00000029477	31641	-1	ENSMUST00000030841	10345	-1	ENSMUST00000032410	2460	-1	ENSMUST00000034132	4873	-1
ENSMUST00000065797	3	1	ENSMUST00000020102	2425	-1	ENSMUST00000021567	108194	-1	ENSMUST00000022831	807	-1	ENSMUST00000024839	936	-1	ENSMUST00000026208	38674	-1	ENSMUST00000027846	7801	-1	ENSMUST00000029477	31838	-1	ENSMUST00000030841	11367	-1	ENSMUST00000032410	2656	-1	ENSMUST00000034132	4915	-1
ENSMUST00000065797	13843	1	ENSMUST00000020102	24573	-1	ENSMUST00000021567	111999	-1	ENSMUST00000022831	8098	-1	ENSMUST00000024839	9452	-1	ENSMUST00000026208	38706	-1	ENSMUST00000027846	7986	-1	ENSMUST00000029477	32200	-1	ENSMUST00000030841	1255	-1	ENSMUST00000032410	2745	-1	ENSMUST00000034132	51	-1
ENSMUST00000065797	13996	1	ENSMUST00000020102	26991	-1	ENSMUST00000021567	114627	-1	ENSMUST00000022831	8137	-1	ENSMUST00000024839	9472	-1	ENSMUST00000026208	38790	-1	ENSMUST00000027846	8430	-1	ENSMUST00000029477	33241	-1	ENSMUST00000030841	15546	-1	ENSMUST00000032410	2830	-1	ENSMUST00000034132	5220	-1
ENSMUST00000065797	14017	1	ENSMUST00000020102	27837	-1	ENSMUST00000021567	120484	-1	ENSMUST00000022831	8284	-1	ENSMUST00000024839	9490	-1	ENSMUST00000026208	39403	-1	ENSMUST00000027846	8519	-1	ENSMUST00000029477	34096	-1	ENSMUST00000030841	17584	-1	ENSMUST00000032410	3096	-1	ENSMUST00000034132	5260	-1
ENSMUST00000065797	14044	1	ENSMUST00000020102	27995	-1	ENSMUST00000021567	121137	-1	ENSMUST00000022831	8929	-1	ENSMUST00000024839	9984	-1	ENSMUST00000026208	40460	-1	ENSMUST00000027846	9200	-1	ENSMUST00000029477	35718	-1	ENSMUST00000030841	18500	-1	ENSMUST00000032410	3231	-1	ENSMUST00000034132	5403	-1
ENSMUST00000065797	14097	1	ENSMUST00000020102	29070	-1	ENSMUST00000021567	122138	-1	ENSMUST00000022831	9366	-1	ENSMUST00000024840	104545	-1	ENSMUST00000026208	41641	-1	ENSMUST00000027846	9233	-1	ENSMUST00000029477	36347	-1	ENSMUST00000030841	18796	-1	ENSMUST00000032410	3284	-1	ENSMUST00000034132	5553	-1
ENSMUST00000065797	14122	1	ENSMUST00000020102	30659	-1	ENSMUST00000021567	122396	-1	ENSMUST00000022831	9553	-1	ENSMUST00000024840	109115	-1	ENSMUST00000026208	42005	-1	ENSMUST00000027846	9629	-1	ENSMUST00000029477	36706	-1	ENSMUST00000030841	18818	-1	ENSMUST00000032410	3450	-1	ENSMUST00000034132	5688	-1
ENSMUST00000065797	14214	1	ENSMUST00000020102	31175	-1	ENSMUST00000021567	122911	-1	ENSMUST00000022831	9975	-1	ENSMUST00000024840	113651	-1	ENSMUST00000026208	42827	-1	ENSMUST00000027846	9727	-1	ENSMUST00000029477	36755	-1	ENSMUST00000030841	19284	-1	ENSMUST00000032410	3472	-1	ENSMUST00000034132	5822	-1
ENSMUST00000065797	14479	1	ENSMUST00000020102	32316	-1	ENSMUST00000021567	124051	-1	ENSMUST00000022855	10044	-1	ENSMUST00000024840	115219	-1	ENSMUST00000026208	42839	-1	ENSMUST00000027846	9733	-1	ENSMUST00000029477	37238	-1	ENSMUST00000030841	21027	-1	ENSMUST00000032410	3562	-1	ENSMUST00000034132	6212	-1
ENSMUST00000065797	14644	1	ENSMUST00000020102	34184	-1	ENSMUST00000021567	125370	-1	ENSMUST00000022855	10135	-1	ENSMUST00000024840	120571	-1	ENSMUST00000026208	42894	-1	ENSMUST00000027846	9868	-1	ENSMUST00000029477	38104	-1	ENSMUST00000030841	23437	-1	ENSMUST00000032410	3730	-1	ENSMUST00000034132	623	-1
ENSMUST00000065797	14657	1	ENSMUST00000020102	34408	-1	ENSMUST00000021567	126481	-1	ENSMUST00000022855	10219	-1	ENSMUST00000024840	121059	-1	ENSMUST00000026208	43464	-1	ENSMUST00000027846	9930	-1	ENSMUST00000029477	38146	-1	ENSMUST00000030841	24748	-1	ENSMUST00000032410	3775	-1	ENSMUST00000034132	6333	-1
ENSMUST00000028648	38609	1	ENSMUST00000020102	36741	-1	ENSMUST00000021567	127737	-1	ENSMUST00000022855	10620	-1	ENSMUST00000024840	121114	-1	ENSMUST00000026208	44211	-1	ENSMUST00000027863	10349	-1	ENSMUST00000029477	38551	-1	ENSMUST00000030841	27243	-1	ENSMUST00000032410	3789	-1	ENSMUST00000034132	6436	-1
ENSMUST00000028648	38677	1	ENSMUST00000020102	38155	-1	ENSMUST00000021567	129507	-1	ENSMUST00000022855	10992	-1	ENSMUST00000024840	123156	-1	ENSMUST00000026208	45651	-1	ENSMUST00000027863	10690	-1	ENSMUST00000029477	38705	-1	ENSMUST00000030841	27892	-1	ENSMUST00000032410	3810	-1	ENSMUST00000034132	6517	-1
ENSMUST00000028648	38775	1	ENSMUST00000020102	38213	-1	ENSMUST00000021567	130875	-1	ENSMUST00000022855	1133	-1	ENSMUST00000024840	123609	-1	ENSMUST00000026208	45913	-1	ENSMUST00000027863	11206	-1	ENSMUST00000029477	39164	-1	ENSMUST00000030841	28833	-1	ENSMUST00000032410	3988	-1	ENSMUST00000034132	6526	-1
ENSMUST00000028648	38790	1	ENSMUST00000020102	3896	-1	ENSMUST00000021567	131554	-1	ENSMUST00000022855	1195	-1	ENSMUST00000024840	13481	-1	ENSMUST00000026208	46964	-1	ENSMUST00000027863	11765	-1	ENSMUST00000029477	40831	-1	ENSMUST00000030841	30005	-1	ENSMUST00000032410	4118	-1	ENSMUST00000034132	6608	-1
ENSMUST00000111274	7056	1	ENSMUST00000020102	39634	-1	ENSMUST00000021567	131986	-1	ENSMUST00000022855	1224	-1	ENSMUST00000024840	135341	-1	ENSMUST00000026208	48713	-1	ENSMUST00000027863	11849	-1	ENSMUST00000029477	4140	-1	ENSMUST00000030841	30475	-1	ENSMUST00000032410	4288	-1	ENSMUST00000034132	6674	-1
ENSMUST00000111274	8528	1	ENSMUST00000020102	41585	-1	ENSMUST00000021567	133054	-1	ENSMUST00000022855	1238	-1	ENSMUST00000024840	136138	-1	ENSMUST00000026208	49243	-1	ENSMUST00000027863	12144	-1	ENSMUST00000029477	44030	-1	ENSMUST00000030841	30836	-1	ENSMUST00000032410	4413	-1	ENSMUST00000034132	6805	-1
ENSMUST00000129661	156	1	ENSMUST00000020102	4272	-1	ENSMUST00000021567	133683	-1	ENSMUST00000022855	1287	-1	ENSMUST00000024840	139161	-1	ENSMUST00000026208	50080	-1	ENSMUST00000027863	12262	-1	ENSMUST00000029477	44253	-1	ENSMUST00000030841	31371	-1	ENSMUST00000032410	5372	-1	ENSMUST00000034132	7102	-1
ENSMUST00000028617	4315	1	ENSMUST00000020102	434	-1	ENSMUST00000021567	136218	-1	ENSMUST00000022855	1351	-1	ENSMUST00000024840	140288	-1	ENSMUST00000026208	52445	-1	ENSMUST00000027863	13692	-1	ENSMUST00000029477	45119	-1	ENSMUST00000030841	31826	-1	ENSMUST00000032410	5543	-1	ENSMUST00000034132	7272	-1
ENSMUST00000135431	1148875	1	ENSMUST00000020102	43475	-1	ENSMUST00000021567	137773	-1	ENSMUST00000022855	1413	-1	ENSMUST00000024840	142376	-1	ENSMUST00000026208	52901	-1	ENSMUST00000027863	14052	-1	ENSMUST00000029477	45185	-1	ENSMUST00000030841	31980	-1	ENSMUST00000032410	556	-1	ENSMUST00000034132	7388	-1
ENSMUST00000135431	1149927	1	ENSMUST00000020102	43842	-1	ENSMUST00000021567	13869	-1	ENSMUST00000022855	2029	-1	ENSMUST00000024840	147793	-1	ENSMUST00000026208	52959	-1	ENSMUST00000027863	14486	-1	ENSMUST00000029477	488	-1	ENSMUST00000030841	32054	-1	ENSMUST00000032410	5735	-1	ENSMUST00000034132	7615	-1
ENSMUST00000135431	1150025	1	ENSMUST00000020102	44089	-1	ENSMUST00000021567	138764	-1	ENSMUST00000022855	2486	-1	ENSMUST00000024840	150024	-1	ENSMUST00000026208	55396	-1	ENSMUST00000027863	14502	-1	ENSMUST00000029477	5976	-1	ENSMUST00000030841	32059	-1	ENSMUST00000032410	5743	-1	ENSMUST00000034132	7738	-1
ENSMUST00000135431	1150070	1	ENSMUST00000020102	45383	-1	ENSMUST00000021567	14885	-1	ENSMUST00000022855	2607	-1	ENSMUST00000024840	15091	-1	ENSMUST00000026208	8078	-1	ENSMUST00000027863	14566	-1	ENSMUST00000029477	7858	-1	ENSMUST00000030841	32174	-1	ENSMUST00000032410	6045	-1	ENSMUST00000034132	7972	-1
ENSMUST00000135431	1311236	1	ENSMUST00000020102	4560	-1	ENSMUST00000021567	19107	-1	ENSMUST00000022855	2747	-1	ENSMUST00000024840	15230	-1	ENSMUST00000026208	9246	-1	ENSMUST00000027863	15169	-1	ENSMUST00000029477	7875	-1	ENSMUST00000030841	32929	-1	ENSMUST00000032410	6103	-1	ENSMUST00000034132	8242	-1
ENSMUST00000135431	1311242	1	ENSMUST00000020102	45662	-1	ENSMUST00000021567	22377	-1	ENSMUST00000022855	2770	-1	ENSMUST00000024840	153222	-1	ENSMUST00000026209	10421	-1	ENSMUST00000027863	15761	-1	ENSMUST00000029477	7882	-1	ENSMUST00000030841	34412	-1	ENSMUST00000032410	6433	-1	ENSMUST00000034132	8435	-1
ENSMUST00000135431	1311252	1	ENSMUST00000020102	45800	-1	ENSMUST00000021567	22723	-1	ENSMUST00000022855	2870	-1	ENSMUST00000024840	154675	-1	ENSMUST00000026209	1229	-1	ENSMUST00000027863	15981	-1	ENSMUST00000029477	8497	-1	ENSMUST00000030841	34467	-1	ENSMUST00000032410	6474	-1	ENSMUST00000034132	8561	-1
ENSMUST00000135431	1311309	1	ENSMUST00000020102	47135	-1	ENSMUST00000021567	24630	-1	ENSMUST00000022855	2981	-1	ENSMUST00000024840	155712	-1	ENSMUST00000026209	14120	-1	ENSMUST00000027863	16282	-1	ENSMUST00000029477	9851	-1	ENSMUST00000030841	37086	-1	ENSMUST00000032410	6817	-1	ENSMUST00000034132	858	-1
ENSMUST00000135431	1311395	1	ENSMUST00000020102	48	-1	ENSMUST00000021567	27518	-1	ENSMUST00000022855	302	-1	ENSMUST00000024840	156849	-1	ENSMUST00000026209	14977	-1	ENSMUST00000027863	16293	-1	ENSMUST00000029477	9951	-1	ENSMUST00000030841	3825	-1	ENSMUST00000032410	7039	-1	ENSMUST00000034136	10867	-1
ENSMUST00000135431	1311503	1	ENSMUST00000020102	4912	-1	ENSMUST00000021567	27955	-1	ENSMUST00000022855	334	-1	ENSMUST00000024840	158615	-1	ENSMUST00000026209	1523	-1	ENSMUST00000027863	16318	-1	ENSMUST00000029482	10689	-1	ENSMUST00000030841	38299	-1	ENSMUST00000032410	705	-1	ENSMUST00000034136	11797	-1
ENSMUST00000135431	1311773	1	ENSMUST00000020102	5411	-1	ENSMUST00000021567	31015	-1	ENSMUST00000022855	3495	-1	ENSMUST00000024840	158708	-1	ENSMUST00000026209	15784	-1	ENSMUST00000027863	16388	-1	ENSMUST00000029482	11315	-1	ENSMUST00000030841	41652	-1	ENSMUST00000032410	7186	-1	ENSMUST00000034136	12726	-1
ENSMUST00000135431	1311815	1	ENSMUST00000020102	5665	-1	ENSMUST00000021567	31947	-1	ENSMUST00000022855	3815	-1	ENSMUST00000024840	159194	-1	ENSMUST00000026209	15815	-1	ENSMUST00000027863	16805	-1	ENSMUST00000029482	11440	-1	ENSMUST00000030841	41754	-1	ENSMUST00000032410	741	-1	ENSMUST00000034136	15240	-1
ENSMUST00000135431	1311866	1	ENSMUST00000020102	577	-1	ENSMUST00000021567	32522	-1	ENSMUST00000022855	3856	-1	ENSMUST00000024840	1596	-1	ENSMUST00000026209	17304	-1	ENSMUST00000027863	17059	-1	ENSMUST00000029482	12026	-1	ENSMUST00000030841	41958	-1	ENSMUST00000032410	760	-1	ENSMUST00000034136	15950	-1
ENSMUST00000135431	1312036	1	ENSMUST00000020102	6003	-1	ENSMUST00000021567	33480	-1	ENSMUST00000022855	414	-1	ENSMUST00000024840	159856	-1	ENSMUST00000026209	18239	-1	ENSMUST00000027863	17313	-1	ENSMUST00000029482	12417	-1	ENSMUST00000030841	43965	-1	ENSMUST00000032410	8019	-1	ENSMUST00000034136	16051	-1
ENSMUST00000135431	1312243	1	ENSMUST00000020102	7251	-1	ENSMUST00000021567	33632	-1	ENSMUST00000022855	4587	-1	ENSMUST00000024840	20182	-1	ENSMUST00000026209	18841	-1	ENSMUST00000027863	17417	-1	ENSMUST00000029482	12948	-1	ENSMUST00000030841	44205	-1	ENSMUST00000032410	8146	-1	ENSMUST00000034136	16373	-1
ENSMUST00000135431	1312251	1	ENSMUST00000020102	8453	-1	ENSMUST00000021567	37639	-1	ENSMUST00000022855	470	-1	ENSMUST00000024840	42175	-1	ENSMUST00000026209	197	-1	ENSMUST00000027863	17894	-1	ENSMUST00000029482	13394	-1	ENSMUST00000030841	4463	-1	ENSMUST00000032410	8416	-1	ENSMUST00000034136	1661	-1
ENSMUST00000135431	1312372	1	ENSMUST00000020102	9192	-1	ENSMUST00000021567	40176	-1	ENSMUST00000022855	5175	-1	ENSMUST00000024840	46555	-1	ENSMUST00000026209	19981	-1	ENSMUST00000027863	18289	-1	ENSMUST00000029482	13505	-1	ENSMUST00000030841	44638	-1	ENSMUST00000032410	8737	-1	ENSMUST00000034136	16631	-1
ENSMUST00000135431	1312535	1	ENSMUST00000020102	9726	-1	ENSMUST00000021567	45273	-1	ENSMUST00000022855	5375	-1	ENSMUST00000024840	47986	-1	ENSMUST00000026209	20154	-1	ENSMUST00000027863	18528	-1	ENSMUST00000029482	13957	-1	ENSMUST00000030841	4548	-1	ENSMUST00000032410	883	-1	ENSMUST00000034136	16832	-1
ENSMUST00000135431	1312549	1	ENSMUST00000020106	104535	-1	ENSMUST00000021567	48506	-1	ENSMUST00000022855	5805	-1	ENSMUST00000024840	50779	-1	ENSMUST00000026209	21136	-1	ENSMUST00000027863	18802	-1	ENSMUST00000029482	1420	-1	ENSMUST00000030841	4626	-1	ENSMUST00000032410	890	-1	ENSMUST00000034136	16901	-1
ENSMUST00000135431	1312555	1	ENSMUST00000020106	105408	-1	ENSMUST00000021567	50340	-1	ENSMUST00000022855	6085	-1	ENSMUST00000024840	51208	-1	ENSMUST00000026209	2148	-1	ENSMUST00000027863	18905	-1	ENSMUST00000029482	14217	-1	ENSMUST00000030841	46650	-1	ENSMUST00000032410	8972	-1	ENSMUST00000034136	17804	-1
ENSMUST00000135431	1312595	1	ENSMUST00000020106	106641	-1	ENSMUST00000021567	51163	-1	ENSMUST00000022855	6709	-1	ENSMUST00000024840	51751	-1	ENSMUST00000026209	21929	-1	ENSMUST00000027863	19199	-1	ENSMUST00000029482	14504	-1	ENSMUST00000030841	46932	-1	ENSMUST00000032410	9130	-1	ENSMUST00000034136	19219	-1
ENSMUST00000135431	1312649	1	ENSMUST00000020106	109913	-1	ENSMUST00000021567	53636	-1	ENSMUST00000022855	674	-1	ENSMUST00000024840	52836	-1	ENSMUST00000026209	23924	-1	ENSMUST00000027863	19912	-1	ENSMUST00000029482	15796	-1	ENSMUST00000030841	47486	-1	ENSMUST00000032410	946	-1	ENSMUST00000034136	19372	-1
ENSMUST00000135431	1312697	1	ENSMUST00000020106	112015	-1	ENSMUST00000021567	53671	-1	ENSMUST00000022855	7097	-1	ENSMUST00000024840	54634	-1	ENSMUST00000026209	24957	-1	ENSMUST00000027863	20013	-1	ENSMUST00000029482	16524	-1	ENSMUST00000030841	47792	-1	ENSMUST00000032410	9460	-1	ENSMUST00000034136	19506	-1
ENSMUST00000135431	1312751	1	ENSMUST00000020106	119404	-1	ENSMUST00000021567	54421	-1	ENSMUST00000022855	711	-1	ENSMUST00000024840	54817	-1	ENSMUST00000026209	25288	-1	ENSMUST00000027863	20034	-1	ENSMUST00000029482	16741	-1	ENSMUST00000030841	49054	-1	ENSMUST00000032410	9874	-1	ENSMUST00000034136	20653	-1
ENSMUST00000135431	1312774	1	ENSMUST00000020106	121720	-1	ENSMUST00000021567	56827	-1	ENSMUST00000022855	7117	-1	ENSMUST00000024840	55806	-1	ENSMUST00000026209	26221	-1	ENSMUST00000027863	2091	-1	ENSMUST00000029482	17101	-1	ENSMUST00000030841	49291	-1	ENSMUST00000032413	10937	-1	ENSMUST00000034136	20859	-1
ENSMUST00000135431	1312828	1	ENSMUST00000020106	124097	-1	ENSMUST00000021567	57417	-1	ENSMUST00000022855	7125	-1	ENSMUST00000024840	60815	-1	ENSMUST00000026209	29616	-1	ENSMUST00000027863	20957	-1	ENSMUST00000029482	17357	-1	ENSMUST00000030841	50730	-1	ENSMUST00000032413	11014	-1	ENSMUST00000034136	20931	-1
ENSMUST00000004949	18940	1	ENSMUST00000020106	128160	-1	ENSMUST00000021567	60710	-1	ENSMUST00000022855	7151	-1	ENSMUST00000024840	65479	-1	ENSMUST00000026209	31244	-1	ENSMUST00000027863	2241	-1	ENSMUST00000029482	17624	-1	ENSMUST00000030841	51309	-1	ENSMUST00000032413	12103	-1	ENSMUST00000034136	21281	-1
ENSMUST00000004949	22402	1	ENSMUST00000020106	129967	-1	ENSMUST00000021567	69633	-1	ENSMUST00000022855	7508	-1	ENSMUST00000024840	65724	-1	ENSMUST00000026209	31463	-1	ENSMUST00000027863	2542	-1	ENSMUST00000029482	17672	-1	ENSMUST00000030841	51952	-1	ENSMUST00000032413	12783	-1	ENSMUST00000034136	21767	-1
ENSMUST00000004949	18488	1	ENSMUST00000020106	130820	-1	ENSMUST00000021567	71165	-1	ENSMUST00000022855	7833	-1	ENSMUST00000024840	66296	-1	ENSMUST00000026209	3156	-1	ENSMUST00000027863	3066	-1	ENSMUST00000029482	19493	-1	ENSMUST00000030841	54376	-1	ENSMUST00000032413	13787	-1	ENSMUST00000034136	21775	-1
ENSMUST00000028584	14866	1	ENSMUST00000020106	130978	-1	ENSMUST00000021567	7636	-1	ENSMUST00000022855	7924	-1	ENSMUST00000024840	6696	-1	ENSMUST00000026209	31646	-1	ENSMUST00000027863	3528	-1	ENSMUST00000029482	20848	-1	ENSMUST00000030841	56163	-1	ENSMUST00000032413	13844	-1	ENSMUST00000034136	2245	-1
ENSMUST00000102573	4087	1	ENSMUST00000020106	142550	-1	ENSMUST00000021567	78055	-1	ENSMUST00000022855	7939	-1	ENSMUST00000024840	67315	-1	ENSMUST00000026209	32017	-1	ENSMUST00000027863	3972	-1	ENSMUST00000029482	2104	-1	ENSMUST00000030841	56897	-1	ENSMUST00000032413	13955	-1	ENSMUST00000034136	22809	-1
ENSMUST00000099678	257	1	ENSMUST00000020106	143237	-1	ENSMUST00000021567	82563	-1	ENSMUST00000022855	794	-1	ENSMUST00000024840	68984	-1	ENSMUST00000026209	32438	-1	ENSMUST00000027863	413	-1	ENSMUST00000029482	23017	-1	ENSMUST00000030841	56997	-1	ENSMUST00000032413	14350	-1	ENSMUST00000034136	23240	-1
ENSMUST00000099678	365	1	ENSMUST00000020106	14335	-1	ENSMUST00000021567	87024	-1	ENSMUST00000022855	7978	-1	ENSMUST00000024840	72628	-1	ENSMUST00000026209	3285	-1	ENSMUST00000027863	4545	-1	ENSMUST00000029482	23656	-1	ENSMUST00000030841	57933	-1	ENSMUST00000032413	14464	-1	ENSMUST00000034136	2331	-1
ENSMUST00000099678	884	1	ENSMUST00000020106	14462	-1	ENSMUST00000021567	90445	-1	ENSMUST00000022855	8106	-1	ENSMUST00000024840	74225	-1	ENSMUST00000026209	3390	-1	ENSMUST00000027863	4638	-1	ENSMUST00000029482	23742	-1	ENSMUST00000030841	58197	-1	ENSMUST00000032413	17925	-1	ENSMUST00000034136	24034	-1
ENSMUST00000099678	912	1	ENSMUST00000020106	144749	-1	ENSMUST00000021567	97372	-1	ENSMUST00000022855	8343	-1	ENSMUST00000024840	81697	-1	ENSMUST00000026209	3466	-1	ENSMUST00000027863	4702	-1	ENSMUST00000029482	25397	-1	ENSMUST00000030841	59153	-1	ENSMUST00000032413	18214	-1	ENSMUST00000034136	2448	-1
ENSMUST00000099678	956	1	ENSMUST00000020106	145853	-1	ENSMUST00000021567	99888	-1	ENSMUST00000022855	8484	-1	ENSMUST00000024840	86848	-1	ENSMUST00000026209	34677	-1	ENSMUST00000027863	4830	-1	ENSMUST00000029482	25805	-1	ENSMUST00000030841	663	-1	ENSMUST00000032413	18904	-1	ENSMUST00000034136	24778	-1
ENSMUST00000099678	1152	1	ENSMUST00000020106	150900	-1	ENSMUST00000021574	10067	-1	ENSMUST00000022855	849	-1	ENSMUST00000024840	89394	-1	ENSMUST00000026209	34880	-1	ENSMUST00000027863	4977	-1	ENSMUST00000029482	26359	-1	ENSMUST00000030841	6884	-1	ENSMUST00000032413	19027	-1	ENSMUST00000034136	24830	-1
ENSMUST00000099678	1161	1	ENSMUST00000020106	153180	-1	ENSMUST00000021574	1031	-1	ENSMUST00000022855	8562	-1	ENSMUST00000024840	89604	-1	ENSMUST00000026209	36267	-1	ENSMUST00000027863	5147	-1	ENSMUST00000029482	2806	-1	ENSMUST00000030841	7515	-1	ENSMUST00000032413	19309	-1	ENSMUST00000034136	24972	-1
ENSMUST00000099678	1209	1	ENSMUST00000020106	157209	-1	ENSMUST00000021574	10396	-1	ENSMUST00000022855	8584	-1	ENSMUST00000024840	89698	-1	ENSMUST00000026209	401	-1	ENSMUST00000027863	5255	-1	ENSMUST00000029482	28448	-1	ENSMUST00000030841	8212	-1	ENSMUST00000032413	1938	-1	ENSMUST00000034136	24996	-1
ENSMUST00000099678	1248	1	ENSMUST00000020106	162488	-1	ENSMUST00000021574	10560	-1	ENSMUST00000022855	8634	-1	ENSMUST00000024840	92442	-1	ENSMUST00000026209	40415	-1	ENSMUST00000027863	5906	-1	ENSMUST00000029482	28891	-1	ENSMUST00000030841	832	-1	ENSMUST00000032413	19939	-1	ENSMUST00000034136	25010	-1
ENSMUST00000099678	1278	1	ENSMUST00000020106	163258	-1	ENSMUST00000021574	10862	-1	ENSMUST00000022855	8641	-1	ENSMUST00000024840	92580	-1	ENSMUST00000026209	41115	-1	ENSMUST00000027863	6571	-1	ENSMUST00000029482	29636	-1	ENSMUST00000030841	9885	-1	ENSMUST00000032413	20462	-1	ENSMUST00000034136	25292	-1
ENSMUST00000099678	1299	1	ENSMUST00000020106	165031	-1	ENSMUST00000021574	11270	-1	ENSMUST00000022855	8845	-1	ENSMUST00000024840	94836	-1	ENSMUST00000026209	41331	-1	ENSMUST00000027863	6603	-1	ENSMUST00000029482	29779	-1	ENSMUST00000030842	10074	-1	ENSMUST00000032413	2049	-1	ENSMUST00000034136	25335	-1
ENSMUST00000099678	1320	1	ENSMUST00000020106	172371	-1	ENSMUST00000021574	1135	-1	ENSMUST00000022855	9137	-1	ENSMUST00000024840	97085	-1	ENSMUST00000026209	42900	-1	ENSMUST00000027863	6783	-1	ENSMUST00000029482	29913	-1	ENSMUST00000030842	107	-1	ENSMUST00000032413	2083	-1	ENSMUST00000034136	25686	-1
ENSMUST00000099678	1354	1	ENSMUST00000020106	172767	-1	ENSMUST00000021574	12146	-1	ENSMUST00000022855	9633	-1	ENSMUST00000024840	99642	-1	ENSMUST00000026209	44134	-1	ENSMUST00000027863	7392	-1	ENSMUST00000029482	30505	-1	ENSMUST00000030842	10796	-1	ENSMUST00000032413	22287	-1	ENSMUST00000034136	26149	-1
ENSMUST00000099678	1987	1	ENSMUST00000020106	175645	-1	ENSMUST00000021574	12293	-1	ENSMUST00000022861	11175	-1	ENSMUST00000024843	100402	-1	ENSMUST00000026209	44439	-1	ENSMUST00000027863	7471	-1	ENSMUST00000029482	3075	-1	ENSMUST00000030842	10976	-1	ENSMUST00000032413	22800	-1	ENSMUST00000034136	26379	-1
[truncated: 6,927 more rows]
